# Supplementary material
Source: PubMed Central journal article supplement (PMC3917326)
Supplement: NIHMS523132-supplement-1_si_001.pdf [file NIHMS523132-supplement-1_si_001.pdf]

*Takáč et al., 2013, SUPPLEMENTAL DATA:*

***Protein extraction for two-dimensional electrophoresis and 2-D LC MS/MS***

The homogenate was resuspended in 0.5 ml of extraction buffer (0.15 M Tris-HCl pH 8.8; 0.4 M EDTA; 0.2% (v/v) 2-mercaptoethanol; 0.9 M sucrose; 25 mM-KCl), thoroughly vortexed and supplemented with 0.5 ml Tris-buffered phenol (pH 8.8). After 30 min of incubation at 4°C, the extract was centrifuged at 8,000g at 4°C for 5 min. The upper phenol phase was collected, and the residual proteins from aqueous phase were re-extracted using extraction buffer and Tris-buffered phenol. Following centrifugation, the phenol phases were combined, and additional extraction buffer was added to maximize the removal of the non-protein compounds. Next, the mixture was intensely mixed, centrifuged, and the phenol phase was collected for protein precipitation. The proteins were precipitated by addition of 5 volumes of 0.1 M ammonium acetate (in 100% methanol) to the phenol phase, and leaving at -20°C overnight. Subsequently, the precipitate was centrifuged at 16,000g at 4°C for 20 min. The supernatant was discarded and the pellet was washed twice with 0.1 M ammonium acetate (in 100% methanol), twice in 80% acetone, and twice in 75% ethanol, consequently. Between washing steps, pellet was thoroughly resuspended and incubated at -20°C for 15 min followed by centrifugation at 12,000g at 4°C for 10 min. Finally, the pellet was air-dried for 10 min.

***2-D electrophoresis***

Proteins (50 µg) were focused on 7 cm long IPG strips (pH range 5-8) using Protean IEF Cell (Bio-Rad) with the following conditions: 150 V for 150 VH, 500 V for 500 VH and 4000 V for 15000 VH including initial active rehydration for 12 hours at 50 V. Next, the protein strips were equilibrated in 1% (w/v) dithiothreitol (DTT) containing equilibration solution (6 M urea; 30% (v/v) glycerin; 70 mM sodium dodecyl sulfate; 0.006% (w/v) bromphenol blue) for

15 min, and subsequently 15 min in equilibration solution containing 2.5% (w/v) iodoacetamide. The strips were applied onto the SDS-gel and sealed with agarose solution (0.5% (w/v) agarose; 0.002% bromphenol blue in 1x SDS running buffer), and separated on 10% SDS-PAGE gels at 80 V.

### **LCQ DecaXp Plus massspectrometer set up**

Globalsetting: Dynamic exclusion “on”, repeat count: 2, repeat duration: 0.5 minutes, exclusion duration: 2.00 minutes; exclusion mass width low = 1.00, high = 2.50; Segment setting: Reject masses: 317.0 and 444.0, Normalized collision energy: 35%, Minimum MS signal:  $10 \times 10^4$ , Minimum MS/MS:  $1 \times 10^4$ , Isolation width (m/z): 3.0. Details of instrument setting: Spray voltage 2.7 kV, Capillary temperature 170°C, AGC (automaticgaincontrol) “on” with MSn Target  $4 \times 10^4$ . Collected spectra (RAW files) were processed by Bioworks 3.1 SR1 (ThermoFinnigan, San Jose; CA) software. The subprogram TurboSequest carried out the protein identification by matching the experimentaldata (masses of parent and fragmented ions/peptides) to those in the database. Search parameters as follows were employed:

DTA Search: Trypsin with two internal cleavage sites, Precursor ( $\Delta$ ) Mass: 1.40 amu, GroupScan: 7, Minimum Group Count: 1, Minimum Ion Count: 15, Charge State: Auto, MSn level: Auto, Peptide: 2.50, Fragment Ions: 0.80, IonSeries: B and Y; Modifications: C=57.05 (differential) for carbamidomethylation of cysteins by iodoacetamide, M= 32.0 (differential) for oxidation of methionines; Charge State Analysis: “off”.

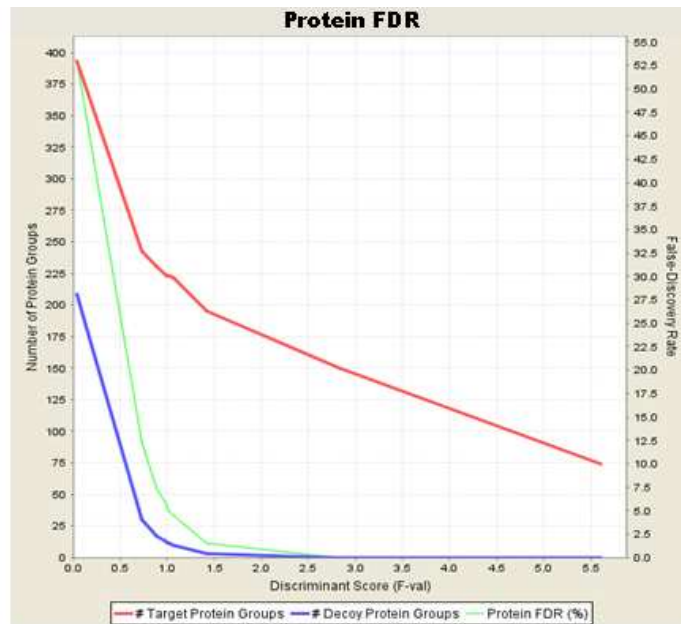

A

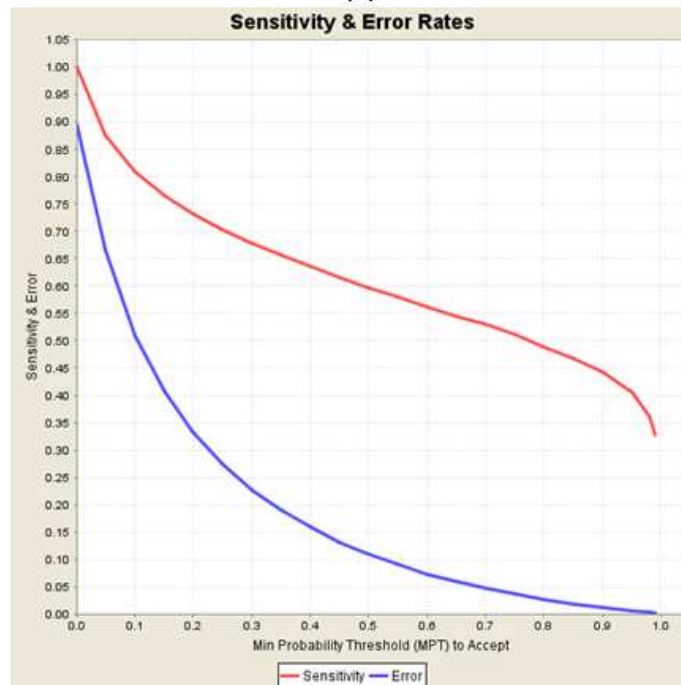

B

**Figure SD 1.** FDR vs. peptide scores (A), and protein probability vs. sensitivity & error (B). Data are shown for total set of identified proteins, as per ProteoIQ software (Premier Biosoft) analysis. **Supplemental Table 1.** The classification of differentially regulated proteins in Arabidopsis roots after LY294002 treatment according KEGG pathways (output of STRING web based application <http://string-db.org>)

| GO_id    | Term                                                   | NumberOfGenes | p-value | p-value_fdr | p-value_bonferroni |
|----------|--------------------------------------------------------|---------------|---------|-------------|--------------------|
| ath00290 | Valine, leucine and isoleucine biosynthesis            | 8             | 1.01E-8 | 1.13E-6     | 1.13E-6            |
| ath00710 | Carbon fixation in photosynthetic organisms            | 7             | 5.61E-5 | 3.14E-3     | 6.29E-3            |
| ath00620 | Pyruvate metabolism                                    | 6             | 3.4E-4  | 1.27E-2     | 3.8E-2             |
| ath00660 | C5-Branched dibasic acid metabolism                    | 2             | 6.98E-4 | 1.95E-2     | 7.82E-2            |
| ath00250 | Alanine, aspartate and glutamate metabolism            | 4             | 3.05E-3 | 6.83E-2     | 3.42E-1            |
| ath00330 | Arginine and proline metabolism                        | 4             | 6.87E-3 | 1.28E-1     | 7.69E-1            |
| ath00010 | Glycolysis / Gluconeogenesis                           | 5             | 9.69E-3 | 1.37E-1     | 1.00E+00           |
| ath00950 | Isoquinoline alkaloid biosynthesis                     | 2             | 9.77E-3 | 1.37E-1     | 1.00E+00           |
| ath00020 | Citrate cycle (TCA cycle)                              | 4             | 1.16E-2 | 1.44E-1     | 1.00E+00           |
| ath00360 | Phenylalanine metabolism                               | 5             | 1.34E-2 | 1.5E-1      | 1.00E+00           |
| ath00270 | Cysteine and methionine metabolism                     | 4             | 1.71E-2 | 1.74E-1     | 1.00E+00           |
| ath00051 | Fructose and mannose metabolism                        | 3             | 2.46E-2 | 2.29E-1     | 1.00E+00           |
| ath00966 | Glucosinolate biosynthesis                             | 2             | 3.4E-2  | 2.93E-1     | 1.00E+00           |
| ath04145 | Phagosome                                              | 3             | 3.9E-2  | 3.06E-1     | 1.00E+00           |
| ath00650 | Butanoate metabolism                                   | 2             | 4.09E-2 | 3.06E-1     | 1.00E+00           |
| ath00960 | Tropane, piperidine and pyridine alkaloid biosynthesis | 2             | 4.46E-2 | 3.12E-1     | 1.00E+00           |
| ath00350 | Tyrosine metabolism                                    | 2             | 5.23E-2 | 3.44E-1     | 1.00E+00           |
| ath00630 | Glyoxylate and dicarboxylate metabolism                | 2             | 6.46E-2 | 4.02E-1     | 1.00E+00           |
| ath00562 | Inositol phosphate metabolism                          | 2             | 1.11E-1 | 6.56E-1     | 1.00E+00           |
| ath00910 | Nitrogen metabolism                                    | 2             | 1.27E-1 | 7.09E-1     | 1.00E+00           |
| ath00400 | Phenylalanine, tyrosine and tryptophan biosynthesis    | 2             | 1.43E-1 | 7.5E-1      | 1.00E+00           |
| ath03010 | Ribosome                                               | 6             | 1.47E-1 | 7.5E-1      | 1.00E+00           |
| ath04146 | Peroxisome                                             | 2             | 1.59E-1 | 7.73E-1     | 1.00E+00           |

|          |                                                       |   |          |          |          |
|----------|-------------------------------------------------------|---|----------|----------|----------|
| ath00190 | Oxidative phosphorylation                             | 4 | 1.82E-1  | 8.48E-1  | 1,00E+00 |
| ath00940 | Phenylpropanoid biosynthesis                          | 3 | 2.29E-1  | 1.00E+00 | 1.00E+00 |
| ath00260 | Glycine, serine and threonine metabolism              | 1 | 1.00E+00 | 1,00E+00 | 1.00E+00 |
| ath00945 | Stilbenoid, diarylheptanoid and gingerol biosynthesis | 1 | 1.00E+00 | 1,00E+00 | 1.00E+00 |
| ath00030 | Pentose phosphate pathway                             | 1 | 1,00E+00 | 1.00E+00 | 1,00E+00 |
| ath00941 | Flavonoid biosynthesis                                | 1 | 1.00E+00 | 1,00E+00 | 1.00E+00 |
| ath00240 | Pyrimidine metabolism                                 | 1 | 1.00E+00 | 1.00E+00 | 1.00E+00 |
| ath00590 | Arachidonic acid metabolism                           | 1 | 1.00E+00 | 1.00E+00 | 1.00E+00 |
| ath00480 | Glutathione metabolism                                | 1 | 1.00E+00 | 1.00E+00 | 1.00E+00 |
| ath03060 | Protein export                                        | 1 | 1.00E+00 | 1.00E+00 | 1.00E+00 |
| ath00380 | Tryptophan metabolism                                 | 1 | 1.00E+00 | 1.00E+00 | 1.00E+00 |
| ath04070 | Phosphatidylinositol signaling system                 | 1 | 1.00E+00 | 1.00E+00 | 1.00E+00 |
| ath00300 | Lysine biosynthesis                                   | 1 | 1.00E+00 | 1.00E+00 | 1.00E+00 |
| ath04140 | Regulation of autophagy                               | 1 | 1.00E+00 | 1.00E+00 | 1.00E+00 |
| ath00450 | Selenoamino acid metabolism                           | 1 | 1.00E+00 | 1.00E+00 | 1.00E+00 |
| ath03050 | Proteasome                                            | 1 | 1.00E+00 | 1.00E+00 | 1.00E+00 |

**Supplemental Table 2.** The comparison of GO annotations (as assigned by Blast2GO application) of differentially regulated proteins after LY294002 and wortmannin treatment in *Arabidopsis* roots.in terms of biological process.

| Level | GO | Term(Acc)  | Term(Name)                                    | wortmannin |        | LY294002 |       |
|-------|----|------------|-----------------------------------------------|------------|--------|----------|-------|
|       |    |            |                                               | #Seq       | Score  | #Seq     | Score |
| 1     |    | GO:0008150 | biological_process                            | 69         | 111.16 | 53       | 77.47 |
| 2     |    | GO:0009987 | cellular process                              | 51         | 50.32  | 30       | 29.8  |
| 2     |    | GO:0050896 | response to stimulus                          | 36         | 39.6   | 24       | 25.8  |
| 2     |    | GO:0008152 | metabolic process                             | 51         | 37.33  | 31       | 21.25 |
| 2     |    | GO:0032501 | multicellular organismal process              | 13         | 7.8    | 9        | 5.4   |
| 2     |    | GO:0032502 | developmental process                         | 13         | 7.8    | 9        | 5.4   |
| 2     |    | GO:0071840 | cellular component organization or biogenesis | 11         | 6.6    | 6        | 3.6   |
| 2     |    | GO:0023052 | signaling                                     | 5          | 3      | -        | -     |
| 2     |    | GO:0051179 | localization                                  | 6          | 2.16   | 4        | 1.44  |
| 2     |    | GO:0065007 | biological regulation                         | 5          | 1.08   |          |       |
| 3     |    | GO:0006950 | response to stress                            | 30         | 30     | 23       | 23    |
| 3     |    | GO:0009628 | response to abiotic stimulus                  | 27         | 27     | 17       | 17    |
| 3     |    | GO:0043170 | macromolecule metabolic process               | -          | -      | 16       | 9.36  |
| 3     |    | GO:0044238 | primary metabolic process                     | -          | -      | 16       | 9.22  |
| 3     |    | GO:0007275 | multicellular organismal development          | 13         | 13     | 9        | 9     |
| 3     |    | GO:0016043 | cellular component organization               | 11         | 11     | 6        | 6     |
| 3     |    | GO:0043170 | macromolecule metabolic process               | 17         | 9.96   | -        | -     |
| 3     |    | GO:0044238 | primary metabolic process                     | 17         | 9.82   | -        | -     |
| 3     |    | GO:0009607 | response to biotic stimulus                   | 6          | 6      | 3        | 3     |
| 3     |    | GO:0051234 | establishment of localization                 | 6          | 3.6    | 4        | 2.4   |
| 3     |    | GO:0007154 | cell communication                            | 5          | 3      | -        | -     |
| 3     |    | GO:0051716 | cellular response to stimulus                 | 5          | 3      | -        | -     |
| 3     |    | GO:0044237 | cellular metabolic process                    | 5          | 2.53   | 3        | 1.33  |
| 3     |    | GO:0050789 | regulation of biological process              | 5          | 1.8    |          |       |
| 3     |    | GO:0006807 | nitrogen compound metabolic process           | 1          | 0.13   | 1        | 0.13  |
| 4     |    | GO:0019538 | protein metabolic process                     | 16         | 16     | 15       | 15    |
| 4     |    | GO:0006810 | transport                                     | 6          | 6      | 4        | 4     |
| 4     |    | GO:0007165 | signal transduction                           | 5          | 5      | -        | -     |

|   |            |                                                  |   |      |   |      |
|---|------------|--------------------------------------------------|---|------|---|------|
| 4 | GO:0006091 | generation of precursor metabolites and energy   | 4 | 4    | 2 | 2    |
| 4 | GO:0050794 | regulation of cellular process                   | 5 | 3    | - | -    |
| 4 | GO:0044260 | cellular macromolecule metabolic process         | 1 | 0.6  | 1 | 0.6  |
| 4 | GO:0006139 | nucleobase-containing compound metabolic process | 1 | 0.36 | 1 | 0.36 |
| 4 | GO:0034641 | cellular nitrogen compound metabolic process     | 1 | 0.22 | 1 | 0.22 |
| 5 | GO:0090304 | nucleic acid metabolic process                   | 1 | 0.6  | 1 | 0.6  |
| 6 | GO:0006259 | DNA metabolic process                            | 1 | 1    | - | -    |
| 6 | GO:0006260 | RNA metabolic process                            | - | -    | 1 | 1    |

**Supplemental Table 3.** The comparison of GO annotations (as assigned by Blast2GO application) of differentially regulated proteins after LY294002 and wortmannin treatment in *Arabidopsis* roots.in terms of molecular function.

| Level | GO Term(Acc) | Term(Name)                                                      | wortmannin |       | LY294002 |       |
|-------|--------------|-----------------------------------------------------------------|------------|-------|----------|-------|
|       |              |                                                                 | #Seq       | Score | #Seq     | Score |
| 1     | GO:0003674   | molecular_function                                              | 69         | 49.7  | 57       | 45.72 |
| 2     | GO:0003824   | catalytic activity                                              | 48         | 36.26 | 36       | 29.03 |
| 2     | GO:0005488   | binding                                                         | 37         | 31.24 | 34       | 30.84 |
| 2     | GO:0005198   | structural molecule activity                                    | 6          | 6     | 6        | 6     |
| 2     | GO:0005215   | transporter activity                                            | 6          | 6     | 2        | 2     |
| 3     | GO:0005515   | protein binding                                                 | 15         | 15    | 18       | 18    |
| 3     | GO:0016740   | transferase activity                                            | 17         | 14.44 | 7        | 5.72  |
| 3     | GO:0016787   | hydrolase activity                                              | 11         | 11    | 11       | 11    |
| 3     | GO:0036094   | small molecule binding                                          | 7          | 4.2   | 5        | 3     |
| 3     | GO:0003676   | nucleic acid binding                                            | 2          | 1.2   | 6        | 5.4   |
| 4     | GO:0000166   | nucleotide binding                                              | 7          | 7     | 5        | 5     |
| 4     | GO:0016772   | transferase activity, transferring phosphorus-containing groups | 4          | 2.4   | 2        | 1.2   |
| 4     | GO:0003677   | DNA binding                                                     | 1          | 1     | 3        | 3     |
| 4     | GO:0003723   | RNA binding                                                     | 1          | 1     | 1        | 1     |
| 5     | GO:0016301   | kinase activity                                                 | 4          | 4     | 2        | 2     |
