# Supplementary material
Source: PubMed Central journal article supplement (PMC3917326)
Supplement: NIHMS523132-supplement-2_si_002.pdf [file NIHMS523132-supplement-2_si_002.pdf]

**Protein Group 1****Expression Quality:**

| Group                 | Group Probability | Num Peptides | % Seq Coverage | Num Spectra |
|-----------------------|-------------------|--------------|----------------|-------------|
| Total (Non-Redundant) | 1                 | 25           | 61.83          | 408.0       |

**Peptides:**

| Observed  | Mr(expt)  | Mr(calc)  | Mass Error (ppm) | Charge | Score | Score Delta | Peptide                            | Group | Replicate |
|-----------|-----------|-----------|------------------|--------|-------|-------------|------------------------------------|-------|-----------|
| 1342.6006 | 2683.1856 | 2683.0537 | 49.15            | 2      | 4.63  | 2.12        | ALDFILGWHLDTTTFGDYPQIMK            | LYK   | rep3      |
| 1341.6643 | 2681.313  | 2683.0537 | 648.77           | 2      | 3.99  | 2.2         | ALDFILGWHLDTTTFGDYPQIMK            | LYT   | rep1      |
| 594.3552  | 1780.0422 | 1779.85   | 108.01           | 3      | 4.73  | 2.84        | CNNDNGDVAVDFFHR : +57.05000 (C1)   | LYK   | rep1      |
| 594.1501  | 1779.427  | 1779.85   | 237.66           | 3      | 4.54  | 2.38        | CNNDNGDVAVDFFHR : +57.05000 (C1)   | LYT   | rep1      |
| 710.0968  | 1418.178  | 1417.6152 | 397              | 2      | 3.51  | 1.31        | DFLSQGVRPSALK                      | LYK   | rep3      |
| 710.4241  | 1418.8326 | 1417.6152 | 858.72           | 2      | 1.95  | 0.25        | DFLSQGVRPSALK                      | LYT   | rep1      |
| 345.8866  | 1034.6363 | 1034.2172 | 405.29           | 3      | 1.9   | 0.37        | DIVGHRLPK                          | LYK   | rep3      |
| 517.9009  | 1033.7862 | 1034.2172 | 416.72           | 2      | 1.64  | 0.61        | DIVGHRLPK                          | LYT   | rep1      |
| 1219.1339 | 3654.3783 | 3654.9197 | 148.13           | 3      | 3.97  | 2.19        | DKYANPEIMIMENGYGEELGASDSVAVGTADHNR | LYT   | rep3      |
| 797.5316  | 2389.5714 | 2389.6687 | 40.72            | 3      | 4.22  | 2.23        | EKGVSQAGVQFYHDLIDELIK              | LYK   | rep1      |
| 797.4911  | 2389.4498 | 2389.6687 | 91.6             | 3      | 3.61  | 1.67        | EKGVSQAGVQFYHDLIDELIK              | LYT   | rep2      |
| 776.9065  | 1551.7974 | 1552.6449 | 545.83           | 2      | 3.44  | 1.61        | EYADFVFQEYGGK                      | LYT   | rep2      |
| 776.9207  | 1551.8257 | 1552.6449 | 527.59           | 2      | 1.27  | 0.27        | EYADFVFQEYGGK                      | LYK   | rep2      |
| 576.7     | 1151.3843 | 1151.3146 | 60.58            | 2      | 2.91  | 1.3         | FGLYYVDFK                          | LYK   | rep1      |
| 576.6324  | 1151.2491 | 1151.3146 | 56.9             | 2      | 2.31  | 0.97        | FGLYYVDFK                          | LYT   | rep2      |
| 1008.079  | 3021.2135 | 3022.2141 | 331.09           | 3      | 5.8   | 3.3         | GGKIGIAHSPAWEAHLADSQDGASIDR        | LYT   | rep1      |
| 626.0041  | 1249.9925 | 1250.4297 | 349.68           | 2      | 3.31  | 1.14        | GPALWDIYCR : +57.05000 (C9)        | LYK   | rep1      |
| 626.5528  | 1251.0899 | 1250.4297 | 527.95           | 2      | 2.89  | 0.71        | GPALWDIYCR : +57.05000 (C9)        | LYT   | rep2      |
| 1066.9229 | 2131.8301 | 2132.3813 | 258.5            | 2      | 4.41  | 0           | GVSQAGVQFYHDLIDELIK                | LYK   | rep2      |
| 1067.5354 | 2133.0552 | 2132.3813 | 316.02           | 2      | 3.46  | 0           | GVSQAGVQFYHDLIDELIK                | LYT   | rep2      |

|           |           |           |         |   |      |      |                                   |     |      |
|-----------|-----------|-----------|---------|---|------|------|-----------------------------------|-----|------|
| 772.6626  | 1543.3096 | 1543.8128 | 325.92  | 2 | 3.25 | 1.49 | HLLSMQEAVCIDK : +57.05000 (C10)   | LYK | rep2 |
| 772.9092  | 1543.8028 | 1543.8128 | 6.47    | 2 | 3.21 | 1.56 | HLLSMQEAVCIDK : +57.05000 (C10)   | LYT | rep3 |
| 797.8588  | 2390.5528 | 2390.6186 | 27.53   | 3 | 6.27 | 4.09 | HWITFNEPWWFSHAGYDVGK              | LYK | rep3 |
| 797.7006  | 2390.0782 | 2390.6186 | 226.06  | 3 | 5.46 | 3.58 | HWITFNEPWWFSHAGYDVGK              | LYT | rep3 |
| 840.3149  | 2517.9213 | 2518.7917 | 345.56  | 3 | 4.84 | 2.85 | HWITFNEPWWFSHAGYDVGKK             | LYT | rep2 |
| 840.3801  | 2518.1169 | 2518.7917 | 267.92  | 3 | 4.72 | 2.9  | HWITFNEPWWFSHAGYDVGKK             | LYK | rep2 |
| 927.7281  | 2780.161  | 2779.9382 | 80.13   | 3 | 6.59 | 3.4  | IGIAHSPAWEAHLADSQDGASIDR          | LYK | rep3 |
| 927.5631  | 2779.665  | 2779.9382 | 97.98   | 3 | 5.72 | 3.6  | IGIAHSPAWEAHLADSQDGASIDR          | LYT | rep2 |
| 430.9002  | 859.7847  | 860.0389  | 295.6   | 2 | 2.46 | 0.74 | MSIAWPR                           | LYT | rep1 |
| 431.0847  | 860.1538  | 860.0389  | 133.62  | 2 | 2.29 | 0.76 | MSIAWPR                           | LYK | rep2 |
| 751.2833  | 2250.8265 | 2251.5076 | 302.49  | 3 | 5.09 | 2.84 | NAQNYAIGSKPLTAALNVYSR             | LYK | rep2 |
| 751.8384  | 2252.4917 | 2251.5076 | 437.09  | 3 | 4.9  | 2.9  | NAQNYAIGSKPLTAALNVYSR             | LYT | rep2 |
| 1124.6803 | 3371.0174 | 3370.6047 | 122.44  | 3 | 5.96 | 3.1  | NGITPFVTVFHWDTPODLEDEYGGFLSER     | LYK | rep3 |
| 1124.5702 | 3370.6871 | 3370.6047 | 24.44   | 3 | 4.42 | 2.05 | NGITPFVTVFHWDTPODLEDEYGGFLSER     | LYT | rep2 |
| 476.2345  | 950.4533  | 950.0107  | 465.9   | 2 | 2.05 | 0.49 | NLNTDAFR                          | LYT | rep1 |
| 475.9542  | 949.8927  | 950.0107  | 124.14  | 2 | 1.27 | 0.28 | NLNTDAFR                          | LYK | rep2 |
| 902.9856  | 2705.9333 | 2706.9702 | 383.05  | 3 | 7.95 | 5.01 | SGYEAYLVTHNLLISHAEAVEAYR          | LYK | rep2 |
| 903.0879  | 2706.2402 | 2706.9702 | 269.68  | 3 | 6.39 | 3.79 | SGYEAYLVT HNLLISHAEAVEAYR         | LYT | rep3 |
| 945.8218  | 2834.4419 | 2835.1431 | 247.32  | 3 | 7.02 | 4.78 | SGYEAYLVTHNLLISHAEAVEAYRK         | LYK | rep3 |
| 945.741   | 2834.1994 | 2835.1431 | 332.83  | 3 | 5.43 | 3.64 | SGYEAYLVTHNLLISHAEAVEAYRK         | LYT | rep2 |
| 873.2347  | 2616.6807 | 2617.9233 | 474.64  | 3 | 5.51 | 3.42 | VKHWITFNEPWWFSHAGYDVGK            | LYK | rep3 |
| 874.1135  | 2619.3171 | 2617.9233 | 532.4   | 3 | 5.07 | 3    | VKHWITFNEPWWFSHAGYDVGK            | LYT | rep1 |
| 763.8975  | 1525.7793 | 1523.715  | 1354.83 | 2 | 1.81 | 0.31 | WMQDSLITWESK                      | LYT | rep3 |
| 1180.7328 | 3539.1749 | 3539.8318 | 185.57  | 3 | 4.35 | 2.72 | YANPEIMIMENGYGEELGASDSVAVGTADHNRK | LYT | rep3 |
| 1180.934  | 3539.7784 | 3539.8318 | 15.08   | 3 | 3.62 | 1.81 | YANPEIMIMENGYGEELGASDSVAVGTADHNRK | LYK | rep1 |
| 390.2817  | 1167.8216 | 1167.3805 | 377.83  | 3 | 2.93 | 0.58 | YKEDIQLMK                         | LYK | rep1 |
| 390.161   | 1167.4596 | 1167.3805 | 67.74   | 3 | 2.82 | 0.28 | YKEDIQLMK                         | LYT | rep2 |

**Matching Genes:**

[NP\\_187537.1](#) (PYK10 (phosphate starvation-response 3.1); hydrolase, hydrolyzing O-glycosyl compounds [Arabidopsis thaliana])

**Protein Group 2****Expression Quality:**

| Group                 | Group Probability | Num Peptides | % Seq Coverage | Num Spectra |
|-----------------------|-------------------|--------------|----------------|-------------|
| Total (Non-Redundant) | 1                 | 17           | 78.19          | 232.0       |

**Peptides:**

| Observed  | Mr(expt)  | Mr(calc)  | Mass Error (ppm) | Charge | Score | Score Delta | Peptide                             | Group | Replicate |
|-----------|-----------|-----------|------------------|--------|-------|-------------|-------------------------------------|-------|-----------|
| 683.482   | 1364.9483 | 1365.5021 | 405.55           | 2      | 2.13  | 0.57        | EEGHKIVGFHGR                        | LYK   | rep3      |
| 683.594   | 1365.1724 | 1365.5021 | 241.42           | 2      | 1.87  | 0.53        | EEGHKIVGFHGR                        | LYT   | rep1      |
| 651.2762  | 1950.8053 | 1951.0593 | 130.21           | 3      | 4.16  | 1.67        | FVYDKSPEEVTGEEHGK                   | LYK   | rep1      |
| 651.2545  | 1950.7401 | 1951.0593 | 163.62           | 3      | 3.85  | 1.68        | FVYDKSPEEVTGEEHGK                   | LYT   | rep3      |
| 844.0955  | 1686.1753 | 1686.741  | 335.3 4          | 2      | 4.2   | 2.17        | GANLWDDGSTHDAVTK                    | LYT   | rep1      |
| 844.6134  | 1687.2112 | 1686.741  | 278.8            | 2      | 3.78  | 1.97        | GANLWDDGSTHDAVTK                    | LYK   | rep2      |
| 1290.7845 | 3869.3302 | 3870.344  | 261.95           | 3      | 5.99  | 3.85        | GRVLPADPFVINHPDEHLVSVEGWYSPEGIIQGIK | LYK   | rep3      |
| 1290.629  | 3868.8636 | 3870.344  | 382.49           | 3      | 5.85  | 3.68        | GRVLPADPFVINHPDEHLVSVEGWYSPEGIIQGIK | LYT   | rep1      |
| 698.8286  | 1395.6416 | 1395.6299 | 8.43             | 2      | 2.38  | 0.26        | IFGSDGSVITMLR                       | LYK   | rep2      |
| 364.8909  | 1091.6491 | 1091.2687 | 348.65           | 3      | 2.71  | 1.4         | IGVHVRPLSN                          | LYK   | rep3      |
| 364.9111  | 1091.7099 | 1091.2687 | 404.35           | 3      | 2.1   | 0.96        | IGVHVRPLSN                          | LYT   | rep2      |
| 1594.6333 | 3187.251  | 3188.6016 | 423.55           | 6.37   | 4.58  |             | IIGFHGSAGGNLNSLGAYFAPLTTTTPLTPAK    | LYK   | rep3      |
| 1063.5367 | 3187.5868 | 3188.6016 | 318.26           | 3      | 4.91  | 2.73        | IIGFHGSAGGNLNSLGAYFAPLTTTTPLTPAK    | LYT   | rep2      |
| 714.4014  | 2140.1806 | 2141.4314 | 584.08           | 3      | 4.98  | 2.7         | IQLAAGIDGIQYVQFDYVK                 | LYK   | rep3      |
| 1072.3069 | 2142.5982 | 2141.4314 | 544.87           | 2      | 2.02  | 0.59        | IQLAAGIDGIQYVQFDYVK                 | LYT   | rep3      |
| 1106.2474 | 3315.7188 | 3316.7744 | 318.25           | 3      | 4.73  | 2.49        | KIIGFHGSAGGNLNSLGAYFAPLTTTTPLTPAK   | LYK   | rep1      |
| 1106.9022 | 3317.6832 | 3316.7744 | 274              | 3      | 4.18  | 1.9 8       | KIIGFHGSAGGNLNSLGAYFAPLTTTTPLTPAK   | LYT   | rep3      |

|           |           |           |        |   |      |      |                                          |     |      |
|-----------|-----------|-----------|--------|---|------|------|------------------------------------------|-----|------|
| 688.4089  | 2062.2033 | 2062.2463 | 20.85  | 3 | 3.79 | 1.6  | KTSDVIGSDEGTHFTLQVK                      | LYT | rep1 |
| 688.4073  | 2062.1986 | 2062.2463 | 23.16  | 3 | 2.13 | 0.34 | KTSDVIGSDEGTHFTLQVK                      | LYK | rep1 |
| 782.1143  | 1562.2129 | 1562.7723 | 357.95 | 2 | 4.31 | 1.65 | KVYVGGQAQDGISAVK                         | LYK | rep3 |
| 782.1397  | 1562.2637 | 1562.7723 | 325.46 | 2 | 4.26 | 1.97 | KVYVGGQAQDGISAVK                         | LYT | rep1 |
| 1201.5432 | 2401.0708 | 2401.6365 | 235.52 | 2 | 2.51 | 1.33 | QTSPFFGLEAGTVFELKEEGHK                   | LYT | rep2 |
| 1201.5642 | 2401.1128 | 2401.6365 | 218.03 | 2 | 2.25 | 0.93 | QTSPFFGLEAGTVFELKEEGHK                   | LYK | rep1 |
| 1537.8743 | 3073.7329 | 3073.3281 | 131.72 | 2 | 4.66 | 2.58 | STLLGFEEFVLDYPSEYITAVDGTYDK              | LYK | rep3 |
| 1537.3562 | 3072.6968 | 3073.3281 | 205.41 | 2 | 3.61 | 1.96 | STLLGFEEFVLDYPSEYITAVDGTYDK              | LYT | rep3 |
| 1484.6307 | 4450.8687 | 4450.9433 | 16.76  | 3 | 5.51 | 3.23 | STLLGFEEFVLDYPSEYITAVDGTYDKIFGSDGSVITMLR | LYK | rep1 |
| 1484.6971 | 4451.068  | 4450.9433 | 28     | 3 | 5.18 | 2.95 | STLLGFEEFVLDYPSEYITAVDGTYDKIFGSDGSVITMLR | LYT | rep2 |
| 967.626   | 1933.2364 | 1934.0734 | 432.76 | 2 | 3.71 | 1.8  | TSDVIGSDEGTHFTLQVK                       | LYK | rep3 |
| 967.7779  | 1933.5401 | 1934.0734 | 275.73 | 2 | 3.59 | 1.82 | TSDVIGSDEGTHFTLQVK                       | LYT | rep3 |
| 1219.4642 | 3655.3692 | 3657.1062 | 474.96 | 3 | 6.94 | 4.91 | VLPADPFVINHPDEHLVSVEGWYSPEGIIQGIK        | LYK | rep3 |
| 1219.8973 | 3656.6685 | 3657.1062 | 119.67 | 3 | 5.84 | 3.75 | VLPADPFVINHPDEHLVSVEGWYSPEGIIQGIK        | LYT | rep3 |
| 718.7205  | 1435.4253 | 1434.5994 | 575.75 | 2 | 3.46 | 1.38 | VYVGGQAQDGISAVK                          | LYT | rep3 |
| 718.1001  | 1434.1846 | 1434.5994 | 289.1  | 2 | 1.45 | 0.3  | VYVGGQAQDGISAVK                          | LYK | rep2 |

**Matching Genes:**

[NP\\_001030710.1](#) (BPP1 (PYK10-BINDING PROTEIN 1) [Arabidopsis thaliana])

---

**Protein Group 3**

**Expression Quality:**

| Group                 | Group Probability | Num Peptides | % Seq Coverage | Num Spectra |
|-----------------------|-------------------|--------------|----------------|-------------|
| Total (Non-Redundant) | 1                 | 20           | 39.74          | 108.0       |

**Peptides:**

| Observed  | Mr(expt)  | Mr(calc)  | Mass Error (ppm) | Charge | Score | Score Delta | Peptide                                                                          | Group | Replicate |
|-----------|-----------|-----------|------------------|--------|-------|-------------|----------------------------------------------------------------------------------|-------|-----------|
| 1192.7984 | 2383.5811 | 2384.7139 | 475.01           | 2      | 2.4   | 0.99        | AAGATWIQLDEPVLVMDLEGQK                                                           | LYT   | rep2      |
| 1038.3452 | 2074.6748 | 2075.2915 | 297.14           | 2      | 4.1   | 2.57        | ALAGQKDEALFSANAAALASR                                                            | LYK   | rep1      |
| 714.4457  | 2140.3136 | 2140.571  | 120.28           | 3      | 2.57  | 0.82        | ALGVDTVPVLVGPVSYLLLSK                                                            | LYT   | rep2      |
| 1081.386  | 2160.7564 | 2161.6013 | 390.88           | 2      | 3.25  | 1.76        | AMTVFWSAMAQSMTSRPMK                                                              | LYT   | rep2      |
| 1081.4846 | 2160.9536 | 2161.6013 | 299.62           | 2      | 2.62  | 1.07        | AMTVFWSAMAQSMTSRPMK                                                              | LYK   | rep2      |
| 600.3817  | 1198.7478 | 1199.316  | 473.76           | 2      | 1.91  | 0.38        | FALESFWDGK                                                                       | LYT   | rep1      |
| 706.7415  | 1411.4673 | 1411.609  | 100.36           | 2      | 2.5   | 1.02        | GGIGVIQIDEAALR                                                                   | LYT   | rep3      |
| 706.7199  | 1411.4241 | 1411.609  | 130.98           | 2      | 2.4   | 1.18        | GGIGVIQIDEAALR                                                                   | LYK   | rep2      |
| 591.698   | 1181.3804 | 1181.3454 | 29.59            | 2      | 2.55  | 0.84        | GVTAFGFDLVR                                                                      | LYT   | rep2      |
| 724.705   | 1447.3943 | 1446.6753 | 497.04           | 2      | 2.33  | 1.02        | HETCYQIALAIK : +57.05000 (C4)                                                    | LYK   | rep2      |
| 802.3881  | 2404.1407 | 2404.6574 | 214.85           | 3      | 5.28  | 3.26        | HETCYQIALAIKDEVEDLEK : +57.05000 (C4)                                            | LYT   | rep2      |
| 802.576   | 2404.7047 | 2404.6574 | 19.68            | 3      | 4.78  | 2.63        | HETCYQIALAIKDEVEDLEK : +57.05000 (C4)                                            | LYK   | rep2      |
| 558.9937  | 1115.9717 | 1116.1838 | 190.03           | 2      | 2.17  | 0.34        | IPSSEEIADR                                                                       | LYT   | rep       |
| 2559.2543 | 1115.9717 | 1116.1838 | 276.95           | 2      | 1.42  | 0.33        | IPSSEEIADR                                                                       | LYK   | rep2      |
| 729.7913  | 1457.5669 | 1457.5914 | 16.8             | 2      | 2.24  | 0.81        | IPSSEEIADRVNK                                                                    | LYT   | rep2      |
| 1635.276  | 4902.8045 | 4903.4007 | 121.58           | 3      | 3.52  | 2.03        | ITNCGVQDSTQIHTHMCYSHFNDDIHSIIDMDADVITIEN<br>SR : +57.05000 (C4); +57.05000 (C17) | LYK   | rep1      |
| 1634.9427 | 4901.8048 | 4903.4007 | 325.47           | 3      | 3.46  | 1.45        | ITNCGVQDSTQIHTHMCYSHFNDDIHSIIDMDADVITIEN<br>SR : +57.05000 (C4); +57.05000 (C17) | LYT   | rep3      |
| 1219.9036 | 2437.7915 | 2438.8708 | 442.54           | 2      | 3.64  | 1.74        | KLNLPIPTTTIGSFQPVELR                                                             | LYT   | rep1      |
| 1220.3255 | 2438.6353 | 2438.8708 | 96.58            | 2      | 3.43  | 1.97        | KLNLPIPTTTIGSFQPVELR                                                             | LYK   | rep2      |

|           |           |           |        |   |      |      |                           |     |      |
|-----------|-----------|-----------|--------|---|------|------|---------------------------|-----|------|
| 997.5152  | 1993.0147 | 1993.1922 | 89.09  | 2 | 4.45 | 0.68 | KSEHAFYLDWAVHSFR          | LYK | rep1 |
| 997.3142  | 1992.6128 | 1993.1922 | 290.7  | 2 | 4.39 | 0.68 | KSEHAFYLDWAVHSFR          | LYT | rep2 |
| 1155.7903 | 2309.565  | 2310.6977 | 490.23 | 2 | 1.83 | 0.53 | LNLPLPTTTTIGSFPQTVELR     | LYK | rep2 |
| 1210.1385 | 2418.2613 | 2418.7102 | 185.61 | 2 | 3.45 | 1.65 | NIWANDFAASLSTLQALEGIVGK   | LYT | rep2 |
| 1210.136  | 2418.2564 | 2418.7102 | 187.62 | 2 | 1.26 | 0.16 | NIWANDFAASLSTLQALEGIVGK   | LYK | rep2 |
| 622.5341  | 1864.5787 | 1865.0194 | 236.3  | 3 | 3.87 | 0.93 | SEHAFYLDWAVHSFR           | LYT | rep2 |
| 622.6361  | 1864.8848 | 1865.0194 | 72.14  | 3 | 3.39 | 0.77 | SEHAFYLDWAVHSFR           | LYK | rep2 |
| 1005.8259 | 3014.4543 | 3014.2737 | 59.93  | 3 | 5.77 | 3.13 | WFDTNYHYIVPELGPEVNFSYASHK | LYT | rep3 |
| 1005.4741 | 3013.3989 | 3014.2737 | 290.21 | 3 | 5.49 | 2.98 | WFDTNYHYIVPELGPEVNFSYASHK | LYK | rep2 |
| 830.7138  | 1659.4119 | 1658.8186 | 357.67 | 2 | 3.72 | 1.84 | YGAGIGPGVYDIHSPR          | LYK | rep1 |
| 553.9995  | 1658.9751 | 1658.8186 | 94.32  | 3 | 3.35 | 1.84 | YGAGIGPGVYDIHSPR          | LYT | rep2 |
| 525.0808  | 1048.146  | 1048.2373 | 87.06  | 2 | 1.62 | 0.37 | YTEVKPALK                 | LYK | rep1 |
| 524.7666  | 1047.5176 | 1048.2373 | 686.56 | 2 | 1.42 | 0.25 | YTEVKPALK                 | LYT | rep1 |

**Matching Genes:**

[NP\\_001078599.1](#) (ATCIMS (COBALAMIN-INDEPENDENT METHIONINE SYNTHASE) [Arabidopsis thaliana])

**Protein Group 4**

**Expression Quality:**

| Group                 | Group Probability | Num Peptides | % Seq Coverage | Num Spectra |
|-----------------------|-------------------|--------------|----------------|-------------|
| Total (Non-Redundant) | 1                 | 18           | 52.88          | 162.0       |

**Peptides:**

| Observed | Mr(expt)  | Mr(calc)  | Mass Error (ppm) | Charge | Score | Score Delta | Peptide        | Group | Replicate |
|----------|-----------|-----------|------------------|--------|-------|-------------|----------------|-------|-----------|
| 696.2669 | 1390.5181 | 1390.5084 | 6.97             | 2      | 3.68  | 2.43        | AHGGFSVFAGVGER | LYT   | rep3      |
| 696.0594 | 1390.1031 | 1390.5084 | 291.51           | 2      | 3.26  | 1.99        | AHGGFSVFAGVGER | LYK   | rep3      |

|           |           |           |         |   |      |      |                                        |     |      |
|-----------|-----------|-----------|---------|---|------|------|----------------------------------------|-----|------|
| 933.571   | 1865.1263 | 1865.0559 | 37.73   | 2 | 1.58 | 0.36 | DAEGQDVLLFIDNIFR                       | LYT | rep3 |
| 1261.3119 | 3780.9122 | 3782.1194 | 319.18  | 3 | 5.6  | 3.09 | ENINSFQGLLDGKYDDLSEQSFYMVGGIDEVAK      | LYT | rep1 |
| 1262.2697 | 3783.7855 | 3782.1194 | 440.52  | 3 | 5.45 | 3.3  | ENINSFQGLLDGKYDDLSEQSFYMVGGIDEVAK      | LYK | rep2 |
| 1270.4095 | 2538.8033 | 2539.7829 | 385.74  | 2 | 1.89 | 0.67 | FEDQEGLPPIMTSLEVQDHPTR                 | LYT | rep1 |
| 532.0341  | 1593.0787 | 1592.8033 | 172.88  | 3 | 3.74 | 1.58 | GEIKTEHYLPIHR                          | LYK | rep3 |
| 796.8714  | 1591.7271 | 1592.8033 | 675.69  | 2 | 2.76 | 1.12 | GEIKTEHYLPIHR                          | LYT | rep1 |
| 1239.6942 | 3716.0592 | 3716.084  | 6.68    | 3 | 2.44 | 0.42 | GSITSVQAIYVPADDLTDPAATTF AHL DATTVLSR  | LYK | rep2 |
| 488.6842  | 975.3528  | 975.1464  | 211.67  | 2 | 2.56 | 0.81 | IGLFGGAGVGK                            | LYT | rep2 |
| 488.6369  | 975.2581  | 975.1464  | 114.53  | 2 | 2.55 | 0.73 | IGLFGGAGVGK                            | LYK | rep2 |
| 693.6851  | 1385.3545 | 1385.5918 | 171.23  | 2 | 2.38 | 0.96 | IMNVLGEPIDER                           | LYT | rep2 |
| 1094.3938 | 2186.772  | 2186.4307 | 156.12  | 2 | 3.45 | 2.12 | IPSAVGYQPTLASDLGALQER                  | LYT | rep2 |
| 1094.0428 | 2186.0699 | 2186.4307 | 165.01  | 2 | 1.33 | 0.1  | IPSAVGYQPTLASDLGALQER                  | LYK | rep2 |
| 1282.2008 | 3843.5789 | 3844.2568 | 176.34  | 3 | 5.61 | 0.25 | KGSITSVQAIYVPADDLTDPAATTF AHL DATTVLSR | LYK | rep1 |
| 1282.1107 | 3843.3087 | 3844.2568 | 246.64  | 3 | 5.29 | 0.14 | KGSITSVQAIYVPADDLTDPAATTF AHL DATTVLSR | LYT | rep3 |
| 761.6341  | 1521.2525 | 1521.8097 | 366.15  | 2 | 3.41 | 1.58 | KVLNTGAPITVPVGR                        | LYT | rep1 |
| 762.2516  | 1522.4876 | 1521.8097 | 445.46  | 2 | 3.12 | 1.21 | KVLNTGAPITVPVGR                        | LYK | rep2 |
| 850.7705  | 1699.5254 | 1699.9586 | 254.82  | 2 | 4.16 | 2.17 | LVLEVSHHLGQNVVR                        | LYK | rep1 |
| 850.7057  | 1699.3958 | 1699.9586 | 331.08  | 2 | 4.08 | 2.5  | LVLEVSHHLGQNVVR                        | LYT | rep2 |
| 624.3185  | 1869.932  | 1868.0865 | 987.87  | 3 | 4.33 | 2.28 | MLSPHILGEEHYNTAR                       | LYK | rep3 |
| 934.6748  | 1867.334  | 1868.0865 | 402.83  | 2 | 3.46 | 1.65 | MLSPHILGEEHYNTAR                       | LYT | rep1 |
| 891.8325  | 2672.4741 | 2673.0139 | 201.95  | 3 | 3.36 | 1.67 | NLQDIIAILGMDELSEDDKLTVAR               | LYK | rep3 |
| 1031.1936 | 2060.3716 | 2061.2583 | 430.16  | 2 | 3.39 | 1.51 | QISELGIYPAVDPLDSTSR                    | LYT | rep1 |
| 389.7349  | 1166.1811 | 1165.3061 | 750.85  | 3 | 3.03 | 1.3  | TEHYLPIHR                              | LYT | rep3 |
| 389.3454  | 1165.0127 | 1165.3061 | 251.8   | 3 | 2.72 | 1.4  | TEHYLPIHR                              | LYK | rep2 |
| 631.9947  | 1261.9737 | 1262.4387 | 368.37  | 2 | 2.5  | 1.23 | TIAMDGTEGLVR                           | LYT | rep1 |
| 633.0215  | 1264.0274 | 1262.4387 | 1258.41 | 2 | 1.44 | 0.18 | TIAMDGTEGLVR                           | LYK | rep3 |
| 713.5703  | 1425.125  | 1425.6341 | 357.11  | 2 | 4.43 | 2.63 | VGLTGLTVAEYFR                          | LYK | rep2 |

|          |           |           |        |   |      |     |               |     |      |
|----------|-----------|-----------|--------|---|------|-----|---------------|-----|------|
| 713.5891 | 1425.1626 | 1425.6341 | 330.74 | 2 | 2.05 | 0.7 | VGLTGLTVAEYFR | LYT | rep2 |
|----------|-----------|-----------|--------|---|------|-----|---------------|-----|------|

**Matching Genes:**

[NP\\_5682.03.1](#) (ATP synthase beta chain 1, mitochondrial [Arabidopsis thaliana])

**Protein Group 5**

**Expression Quality:**

| Group                 | Group Probability | Num Peptides | % Seq Coverage | Num Spectra |
|-----------------------|-------------------|--------------|----------------|-------------|
| Total (Non-Redundant) | 1                 | 18           | 61.24          | 179.0       |

**Peptides:**

| Observed  | Mr(expt)  | Mr(calc)  | Mass Error (ppm) | Charge | Score | Score Delta | Peptide                                                                 | Group | Replicate |
|-----------|-----------|-----------|------------------|--------|-------|-------------|-------------------------------------------------------------------------|-------|-----------|
| 383.9609  | 1148.8593 | 1148.3569 | 437.51           | 3      | 3.08  | 0.68        | AGIALSDKFVK                                                             | LYK   | rep1      |
| 574.9402  | 1147.8648 | 1148.3569 | 428.56           | 2      | 2.92  | 0.53        | AGIALSDKFVK                                                             | LYT   | rep3      |
| 868.5367  | 1735.0577 | 1734.9337 | 71.44            | 2      | 3.7   | 1.72        | DAPMFVVGVEHEEYK                                                         | LYK   | rep3      |
| 1323.4948 | 3967.4608 | 3967.4325 | 7.12             | 3      | 6.06  | 3.69        | DAPMFVVGVEHEEYKSDLDIVSNASCTTNCLAPLAK : +57.05000 (C26); +57.05000 (C30) | LYT   | rep2      |
| 1323.1307 | 3966.3687 | 3967.4325 | 268.13           | 3      | 4.69  | 2.83        | DAPMFVVGVEHEEYKSDLDIVSNASCTTNCLAPLAK : +57.05000 (C26); +57.05000 (C30) | LYK   | rep1      |
| 1017.0491 | 2032.0826 | 2033.3579 | 627.21           | 2      | 5.42  | 3           | FGIVEGLMTTVHSITATQK                                                     | LYK   | rep3      |
| 1017.4654 | 2032.9151 | 2033.3579 | 217.78           | 2      | 4.6   | 2.93        | FGIVEGLMTTVHSITATQK                                                     | LYT   | rep1      |
| 1086.847  | 2171.6783 | 2172.2712 | 272.97           | 2      | 2.49  | 1.05        | GILGYTEDDVVSTDFVGDNR                                                    | LYT   | rep2      |
| 417.4959  | 832.9762  | 832.9501  | 31.42            | 2      | 2.5   | 0.43        | IGINGFGR                                                                | LYK   | rep1      |
| 417.3536  | 832.6916  | 832.9501  | 310.34           | 2      | 2.04  | 0.13        | IGINGFGR                                                                | LYT   | rep1      |
| 393.1338  | 784.252   | 783.9653  | 365.67           | 2      | 2.16  | 0.34        | IGRLVAR                                                                 | LYK   | rep3      |
| 465.2591  | 928.5026  | 928.1312  | 400.14           | 2      | 2.82  | 1.19        | KVVISAPSK                                                               | LYK   | rep3      |
| 464.9182  | 927.8207  | 928.1312  | 334.54           | 2      | 2     | 0.61        | KVVISAPSK                                                               | LYT   | rep3      |



|           |           |           |        |   |      |      |                                                          |      |      |
|-----------|-----------|-----------|--------|---|------|------|----------------------------------------------------------|------|------|
| 406.5302  | 811.0448  | 810.9646  | 98.88  | 2 | 1.86 | 0.42 | LTGMSFR                                                  | LYT  | rep2 |
| 881.9978  | 1761.98   | 1761.8511 | 73.19  | 2 | 3.15 | 1.87 | LVSWYDNEWGYSSR                                           | L YK | rep3 |
| 881.555   | 1761.0943 | 1761.8511 | 429.54 | 2 | 1.11 | 0.13 | LVSWYDNEWGYSSR                                           | LYT  | rep2 |
| 985.9843  | 2954.9293 | 2954.1269 | 271.6  | 3 | 3.08 | 1.43 | NPEDIPWAEAGADYVVESTGVFTDKDK                              | LYK  | rep3 |
| 985.6543  | 2953.9394 | 2954.1269 | 63.48  | 3 | 1.68 | 0.48 | NPEDIPWAEAGADYVVESTGVFTDKDK                              | LYT  | rep1 |
| 1125.7771 | 2249.5386 | 2250.5136 | 433.24 | 2 | 2.3  | 0.23 | SDLDIVSNASCTTNCLAPLAK : +57.05000 (C11); +57.05000 (C15) | LYT  | rep1 |
| 1126.3684 | 2250.7212 | 2250.5136 | 92.25  | 2 | 2.2  | 0.36 | SDLDIVSNASCTTNCLAPLAK : +57.05000 (C11); +57.05000 (C15) | LYK  | rep2 |
| 560.1564  | 1677.4456 | 1677.0033 | 263.78 | 3 | 4.43 | 2.43 | TLLFGEKPVTVFGIR                                          | LYT  | rep3 |
| 839.5547  | 1677.0938 | 1677.0033 | 53.97  | 2 | 4.3  | 2.22 | TLLFGEKPVTVFG IR                                         | LYK  | rep1 |
| 750.292   | 1498.5684 | 1498.7266 | 105.53 | 2 | 2.77 | 1.66 | VPTVDVSVVDLTVR                                           | LYT  | rep2 |
| 750.5342  | 1499.0528 | 1498.7266 | 217.66 | 2 | 2.7  | 1.14 | VPTVDVSVVDLTVR                                           | LYK  | rep3 |
| 571.2775  | 1140.5393 | 1140.4014 | 121    | 2 | 3.43 | 1.68 | VVDLIVHMSK                                               | LYK  | rep1 |
| 571.1421  | 1140.2686 | 1140.4014 | 116.42 | 2 | 2.1  | 0.9  | VVDLIVHMSK                                               | LYT  | rep3 |
| 606.57    | 1211.1243 | 1211.4796 | 293.28 | 2 | 3.52 | 1.64 | VVDLIVHMSKA                                              | LYT  | rep2 |
| 839.5197  | 2515.5355 | 2516.8772 | 533.08 | 3 | 3.5  | 1.75 | VVISAPSKDAPMFVVGNEHEYK                                   | LYT  | rep1 |
| 839.7096  | 2516.1053 | 2516.8772 | 306.68 | 3 | 2.08 | 0.6  | VVISAPSKDAPMFVVGNEHEYK                                   | LYK  | rep1 |
| 560.4716  | 1118.9275 | 1119.191  | 235.44 | 2 | 2.81 | 1.28 | YDSVHGQWK                                                | LYK  | rep3 |
| 560.5179  | 1119.0201 | 1119.191  | 152.76 | 2 | 2.6  | 1.23 | YDSVHGQWK                                                | LYT  | rep3 |

**Matching Genes:**

[NP\\_187062.1](#) (GAPC (GLYCERALDEHYDE-3-PHOSPHATE DEHYDROGENASE C SUBUNIT); glyceraldehyde-3-phosphate dehydrogenase [Arabidopsis thaliana])

**Protein Group 6**

**Expression Quality:**

| Group                 | Group Probability | Num Peptides | % Seq Coverage | Num Spectra |
|-----------------------|-------------------|--------------|----------------|-------------|
| Total (Non-Redundant) | 1                 | 18           | 61.24          | 176.0       |

**Peptides:**

| Observed  | Mr(expt)  | Mr(calc)  | Mass Error (ppm) | Charge | Score | Score Delta | Peptide                                                                 | Group | Replicate |
|-----------|-----------|-----------|------------------|--------|-------|-------------|-------------------------------------------------------------------------|-------|-----------|
| 383.9609  | 1148.8593 | 1148.3569 | 437.51           | 3      | 3.08  | 0.68        | AGIALSDKFVK                                                             | LYK   | rep1      |
| 574.9402  | 1147.8648 | 1148.3569 | 428.56           | 2      | 2.92  | 0.53        | AGIALSDKFVK                                                             | LYT   | rep3      |
| 868.5367  | 1735.0577 | 1734.9337 | 71.44            | 2      | 3.7   | 1.72        | DAPMFVVGVEHEEYK                                                         | LYK   | rep3      |
| 1323.4948 | 3967.4608 | 3967.4325 | 7.12             | 3      | 6.06  | 3.69        | DAPMFVVGVEHEEYKSDLDIVSNASCTTNCLAPLAK : +57.05000 (C26); +57.05000 (C30) | LYT   | rep2      |
| 1323.1307 | 3966.3687 | 3967.4325 | 268.13           | 3      | 4.69  | 2.83        | DAPMFVVGVEHEEYKSDLDIVSNASCTTNCLAPLAK : +57.05000 (C26); +57.05000 (C30) | LYK   | rep1      |
| 1017.0491 | 2032.0826 | 2033.3579 | 627.21           | 2      | 5.42  | 3           | FGIVEGLMTTVHSITATQK                                                     | LYK   | rep3      |
| 1017.4654 | 2032.9151 | 2033.3579 | 217.78           | 2      | 4.6   | 2.93        | FGIVEGLMTTVHSITATQK                                                     | LYT   | rep1      |
| 1086.847  | 2171.6783 | 2172.2712 | 272.97           | 2      | 2.49  | 1.05        | GILGYTEDDVVSTDFVGDNR                                                    | LYT   | rep2      |
| 417.4959  | 832.9762  | 832.9501  | 31.42            | 2      | 2.5   | 0.43        | IGINGFGR                                                                | LYK   | rep1      |
| 417.3536  | 832.6916  | 832.9501  | 310.34           | 2      | 2.04  | 0.13        | IGINGFGR                                                                | LYT   | rep1      |
| 393.1338  | 784.252   | 783.9653  | 365.67           | 2      | 2.16  | 0.34        | IGRLVAR                                                                 | LYK   | rep3      |
| 465.2591  | 928.5026  | 928.1312  | 400.14           | 2      | 2.82  | 1.19        | KVVISAPSK                                                               | LYK   | rep3      |
| 464.9182  | 927.8207  | 928.1312  | 334.54           | 2      | 2     | 0.61        | KVVISAPSK                                                               | LYT   | rep3      |
| 406.5302  | 811.0448  | 810.9646  | 98.88            | 2      | 1.86  | 0.42        | LTGMSFR                                                                 | LYT   | rep2      |
| 881.9978  | 1761.98   | 1761.8511 | 73.19            | 2      | 3.15  | 1.87        | LVSWYDNEWGYSSR                                                          | LYK   | rep3      |
| 881.555   | 1761.0943 | 1761.8511 | 429.54           | 2      | 1.11  | 0.13        | LVSWYDNEWGYSSR                                                          | LYT   | rep2      |
| 975.4181  | 2923.2308 | 2924.1008 | 297.53           | 3      | 3.02  | 1.08        | NPEDIPWGEAGADFVVESTGVFTDKDK                                             | LYK   | rep3      |
| 1463.1165 | 2924.2173 | 2924.1008 | 39.84            | 2      | 1.19  | 0.11        | NPEDIPWGEAGADFVVESTGVFTDKDK                                             | LYT   | rep3      |
| 1125.7771 | 2249.5386 | 2250.5136 | 433.24           | 2      | 2.3   | 0.23        | SDLDIVSNASCTTNCLAPLAK : +57.05000 (C11); +57.05000 (C15)                | LYT   | rep1      |
| 1126.3684 | 2250.7212 | 2250.5136 | 92.25            | 2      | 2.2   | 0.36        | SDLDIVSNASCTTNCLAPLAK : +57.05000 (C11); +57.05000 (C15)                | LYK   | rep2      |
| 560.1564  | 1677.4456 | 1677.0033 | 263.78           | 3      | 4.43  | 2.43        | TLLFGEKPVTVFGIR                                                         | LYT   | rep3      |

|          |           |           |        |   |      |      |                         |     |      |
|----------|-----------|-----------|--------|---|------|------|-------------------------|-----|------|
| 839.5547 | 1677.0938 | 1677.0033 | 53.97  | 2 | 4.3  | 2.22 | TLLFGKEPVTV FGIR        | LYK | rep1 |
| 750.292  | 1498.5684 | 1498.7266 | 105.53 | 2 | 2.77 | 1.66 | VPTVDVSVVDLTVR          | LYT | rep2 |
| 750.5342 | 1499.0528 | 1498.7266 | 217.66 | 2 | 2.7  | 1.14 | VPTVDVSVVDLTVR          | LYK | rep3 |
| 571.2775 | 1140.5393 | 1140.4014 | 121    | 2 | 3.43 | 1.68 | VVDLIVHMSK              | LYK | rep1 |
| 571.1421 | 1140.2686 | 1140.4014 | 116.42 | 2 | 2.1  | 0.9  | VVDLIVHMSK              | LYT | rep3 |
| 606.57   | 1211.1243 | 1211.4796 | 293.28 | 2 | 3.52 | 1.64 | VVDLIVHMSKA             | LYT | rep2 |
| 839.5197 | 2515.5355 | 2516.8772 | 533.08 | 3 | 3.5  | 1.75 | VVISAPSKDAPMFVVGVEHEEYK | LYT | rep1 |
| 839.7096 | 2516.1053 | 2516.8772 | 306.68 | 3 | 2.08 | 0.6  | VVISAPSKDAPMFVVGVEHEEYK | LYK | rep1 |
| 560.4716 | 1118.9275 | 1119.191  | 235.44 | 2 | 2.81 | 1.28 | YDSVHGQWK               | LYK | rep3 |
| 560.5179 | 1119.0201 | 1119.191  | 152.76 | 2 | 2.6  | 1.23 | YDSVHGQWK               | LYT | rep3 |

**Matching Genes:**

[NP\\_172801.1](#) (GAPC-2; glyceraldehyde-3-phosphate dehydrogenase [Arabidopsis thaliana])

**Protein Group 7**

**Expression Quality:**

| Group                 | Group Probability | Num Peptides | % Seq Coverage | Num Spectra |
|-----------------------|-------------------|--------------|----------------|-------------|
| Total (Non-Redundant) | 1                 | 12           | 66.77          | 157.0       |

**Peptides:**

| Observed  | Mr(expt)  | Mr(calc)  | Mass Error (ppm) | Charge | Score | Score Delta | Peptide                                             | Group | Replicate |
|-----------|-----------|-----------|------------------|--------|-------|-------------|-----------------------------------------------------|-------|-----------|
| 694.8766  | 1387.7376 | 1388.5592 | 591.7            | 2      | 3.1   | 1.46        | ASAGQFHMMFAGK                                       | LYT   | rep3      |
| 692.4921  | 2074.4527 | 2074.3367 | 55.95            | 3      | 5.79  | 3.34        | ASAGQFHMMFAGKPHHVSK                                 | LYK   | rep3      |
| 692.5566  | 2074.6464 | 2074.3367 | 149.34           | 3      | 4.36  | 2.08        | ASAGQFHMMFAGKPHHVSK                                 | LYT   | rep2      |
| 1249.5599 | 3745.6563 | 3746.9972 | 357.84           | 3      | 5.3   | 3.19        | ASPGNIQSCDLHEGDWGTVGSIVFWNYVHDGEAK : +57.05000 (C9) | LYT   | rep3      |
| 1250.0868 | 3747.2369 | 3746.9972 | 63.98            | 3      | 4.81  | 2.04        | ASPGNIQSCDLHEGDWGTVGSIVFWNYVHDGEAK : +57.05000 (C9) | LYK   | rep3      |
| 1254.0624 | 3759.1637 | 3761.0238 | 494.59           | 3      | 4.7   | 2.36        | ATPGNIQSCDLHEGDWGTVGSIVFWNYVHDGEAK : +57.05000 (C9) | LYK   | rep3      |

|           |           |           |        |   |      |      |                                                      |     |      |
|-----------|-----------|-----------|--------|---|------|------|------------------------------------------------------|-----|------|
| 1253.9979 | 3758.9703 | 3761.0238 | 546    | 3 | 4.42 | 2.1  | ATPGNIQSCDLHEGDWGTVGSIVFWNYVHDGEAK : +57.05000 (C9)  | LYT | rep3 |
| 830.5576  | 1659.0996 | 1659.9214 | 495.04 | 2 | 3.83 | 2.38 | FHHMFAGKPHHVSK                                       | LYK | rep2 |
| 830.7055  | 1659.3953 | 1659.9214 | 316.93 | 2 | 3.28 | 2.02 | FHHMFAGKPHHVSK                                       | LYT | rep3 |
| 923.4713  | 1844.927  | 1846.0176 | 590.75 | 2 | 5.17 | 3.17 | HGGPGSIVHWHLEYEK                                     | LYK | rep3 |
| 616.3041  | 1845.8888 | 1846.0176 | 69.78  | 3 | 4.5  | 2.58 | HGGPGSIVHWHLEYEK                                     | LYT | rep2 |
| 619.5101  | 1855.5069 | 1855.9693 | 249.16 | 3 | 4.55 | 2.86 | HGGSGSVVHWHFEYEK                                     | LYK | rep2 |
| 619.3712  | 1855.0902 | 1855.9693 | 473.7  | 3 | 4.53 | 2.97 | HGGSGSVVHWHFEYEK                                     | LYT | rep2 |
| 549.3322  | 1644.973  | 1644.8733 | 60.62  | 3 | 4    | 0.44 | IEAVDPEKNLITFR                                       | LYK | rep1 |
| 549.41    | 1645.2066 | 1644.8733 | 202.66 | 3 | 3.31 | 0.48 | IEAVDPEKNLITFR                                       | LYT | rep2 |
| 830.2393  | 1658.4629 | 1658.9    | 263.48 | 2 | 2.15 | 1.05 | IEAVEPEKNLITFR                                       | LYT | rep2 |
| 554.141   | 1659.3995 | 1658.9    | 301.09 | 3 | 2.03 | 0.65 | IEAVEPEKNLITFR                                       | LYK | rep1 |
| 752.2364  | 2253.6859 | 2253.5168 | 75.01  | 3 | 5.22 | 2.88 | INEEV AHPETLLQFAVEVSK                                | LYK | rep1 |
| 1127.2141 | 2252.4126 | 2253.5168 | 489.99 | 2 | 2.88 | 1.4  | INEEV AHPETLLQFAVEVSK                                | LYT | rep3 |
| 1144.9344 | 3431.7799 | 3432.7558 | 284.31 | 3 | 3.96 | 2.09 | INEEV AHPETLLQFAVEVSKEIDEHLLAEE                      | LYK | rep1 |
| 1144.933  | 3431.7755 | 3432.7558 | 285.59 | 3 | 3.31 | 1.79 | INEEV AHPETLLQFAVEVSKEIDEHLLAEE                      | LYT | rep2 |
| 1327.6881 | 3980.0409 | 3982.309  | 569.56 | 3 | 6.49 | 4.24 | ISDEVAHP ETLQFCVEVSQEIDEHLLSEEEVSK : +57.05000 (C15) | LYK | rep3 |
| 1327.9388 | 3980.7931 | 3982.309  | 380.67 | 3 | 4.61 | 2.85 | ISDEVAHPETLLQFCVEVSQEIDEHLLSEEEVSK : +57.05000 (C15) | LYT | rep3 |

**Matching Genes:**

[NP\\_001031265.1](#) (MLP34 (MLP-LIKE PROTEIN 34) [Arabidopsis thaliana])

**Protein Group 8**

**Expression Quality:**

| Group                 | Group Probability | Num Peptides | % Seq Coverage | Num Spectra |
|-----------------------|-------------------|--------------|----------------|-------------|
| Total (Non-Redundant) | 1                 | 15           | 56.15          | 111.0       |

**Peptides:**

| Observed | Mr(expt) | Mr(calc) | Mass Error | Charge | Score | Score Delta | Peptide | Gro | Replic |
|----------|----------|----------|------------|--------|-------|-------------|---------|-----|--------|
|----------|----------|----------|------------|--------|-------|-------------|---------|-----|--------|

|           |           |           | (ppm)  |   |      |      |                                                          | up  | ate  |
|-----------|-----------|-----------|--------|---|------|------|----------------------------------------------------------|-----|------|
| 886.8019  | 2657.3822 | 2657.9658 | 219.6  | 3 | 3.31 | 1.16 | CNVLVNIEQQSPDIAQGVHGLTK : +57.05000 (C1)                 | LYK | rep2 |
| 886.8911  | 2657.6499 | 2657.9658 | 118.88 | 3 | 3.3  | 1.74 | CNVLVNIEQQSPDIAQGVHGLTK : +57.05000 (C1)                 | LYT | rep3 |
| 845.1508  | 1688.2859 | 1688.8815 | 352.62 | 2 | 2.21 | 0.92 | DDPDFTWEVVKPLK                                           | LYT | rep3 |
| 615.8959  | 1229.7762 | 1230.5043 | 591.71 | 2 | 3.05 | 1.35 | EHVIKPVIPAK                                              | LYT | rep3 |
| 616.0539  | 1230.0921 | 1230.5043 | 334.97 | 2 | 2.8  | 1.15 | EHVIKPVIPAK                                              | LYK | rep2 |
| 1397.4005 | 4189.1781 | 4189.6351 | 109.09 | 3 | 4.11 | 2.47 | EIGFISADVGLDADKCNVLVNIEQQSPDIAQGVHGLTK : +57.05000 (C16) | LYT | rep2 |
| 1397.389  | 4189.1436 | 4189.6351 | 117.31 | 3 | 4.03 | 2.49 | EIGFISADVGLDADKCNVLVNIEQQSPDIAQGVHGLTK : +57.05000 (C16) | LYK | rep1 |
| 728.3991  | 1454.7825 | 1453.6077 | 808.23 | 2 | 3.79 | 1.63 | FVIGGPHGDAGLTGR                                          | LYK | rep3 |
| 728.1792  | 1454.3428 | 1453.6077 | 505.75 | 2 | 3.35 | 1.6  | FVIGGPHGDAGLTGR                                          | LYT | rep2 |
| 791.2668  | 1580.5179 | 1581.7805 | 798.24 | 2 | 3.21 | 0.97 | FVIGGPHGDAGLTGRK                                         | LYK | rep3 |
| 791.6436  | 1581.2715 | 1581.7805 | 321.78 | 2 | 3.16 | 1.24 | FVIGGPHGDAGLTGRK                                         | LYT | rep1 |
| 1203.2942 | 2404.5728 | 2405.6301 | 439.52 | 2 | 2.89 | 1.58 | IIIDTYGGWGAHGGGAFSGKDPTK                                 | LYT | rep3 |
| 802.4052  | 2404.192  | 2405.6301 | 597.82 | 3 | 1.32 | 0.22 | IIIDTYGGWGAHGGGAFSGKDPTK                                 | LYK | rep2 |
| 698.3312  | 2091.9701 | 2092.3223 | 168.33 | 3 | 4.54 | 2.5  | KIIIDTYGGWGAHGGGAFSGK                                    | LYK | rep3 |
| 698.36    | 2092.0565 | 2092.3223 | 127.02 | 3 | 3.98 | 2.12 | KIIIDTYGGWGAHGGGAFSGK                                    | LYT | rep3 |
| 1224.0038 | 3668.9879 | 3671.0901 | 572.64 | 3 | 6.79 | 0.1  | KPEDIGAGDQGHMFGYATDETPELMPLTHVLATK                       | LYK | rep3 |
| 1224.6412 | 3670.9002 | 3671.0901 | 51.7 1 | 3 | 4.95 | 0.4  | KPEDIGAGDQGHMFGYATDETPELMPLTHVLATK                       | LYT | rep3 |
| 422.4604  | 842.9051  | 842.9864  | 96.46  | 2 | 1.74 | 0.65 | SVVAAGLAR                                                | LYT | rep2 |
| 490.5493  | 979.0829  | 979.0537  | 29.85  | 2 | 2.05 | 0.91 | TAAYGHFGR                                                | LYK | rep3 |
| 490.4787  | 978.9418  | 979.0537  | 114.28 | 2 | 1.93 | 0.84 | TAAYGHFGR                                                | LYT | rep3 |
| 615.5623  | 1229.1089 | 1229.412  | 246.55 | 2 | 2.26 | 0.81 | TCPWLRPDGK : +57.05000 (C2)                              | LYT | rep3 |
| 509.6957  | 1526.0637 | 1525.8351 | 149.87 | 3 | 3.74 | 0.89 | TGTIPDKDILVLIK                                           | LYK | rep2 |
| 883.9004  | 2648.6777 | 2649.8721 | 450.72 | 3 | 5.18 | 2.81 | VHTVLISTQHDETVTNDEIAADLK                                 | LYT | rep1 |
| 883.871   | 2648.5894 | 2649.8721 | 484.03 | 3 | 3.36 | 1.1  | VHTVLISTQHDETVTNDEIAADLK                                 | LYK | rep3 |
| 881.6313  | 1761.2469 | 1761.8957 | 368.28 | 2 | 2.85 | 0.99 | YLDDNTIFHLNPSGR                                          | LYK | rep2 |

|          |           |           |        |   |      |      |                 |     |      |
|----------|-----------|-----------|--------|---|------|------|-----------------|-----|------|
| 881.7307 | 1761.4458 | 1761.8957 | 255.35 | 2 | 2.72 | 1.06 | YLDDNTIFHLNPSGR | LYT | rep3 |
|----------|-----------|-----------|--------|---|------|------|-----------------|-----|------|

**Matching Genes:**

[NP\\_181225.1](#) (MAT3 (METHIONINE ADENOSYLTRANSFERASE 3); methionine adenosyltransferase [Arabidopsis thaliana])

**Protein Group 9**

**Expression Quality:**

| Group                 | Group Probability | Num Peptides | % Seq Coverage | Num Spectra |
|-----------------------|-------------------|--------------|----------------|-------------|
| Total (Non-Redundant) | 1                 | 16           | 50             | 75.0        |

**Peptides:**

| Observed  | Mr(expt)  | Mr(calc)  | Mass Error (ppm) | Charge | Score | Score Delta | Peptide                                                        | Group | Replicate |
|-----------|-----------|-----------|------------------|--------|-------|-------------|----------------------------------------------------------------|-------|-----------|
| 552.0013  | 1101.9869 | 1101.2439 | 674.66           | 2      | 1.73  | 0.44        | AGWGVMTSHR                                                     | LYK   | rep1      |
| 551.5285  | 1101.0413 | 1101.2439 | 183.96           | 2      | 1.58  | 0.34        | AGWGVMTSHR                                                     | LYT   | rep3      |
| 775.5354  | 1549.0552 | 1549.8199 | 493.43           | 2      | 2.59  | 1.17        | AVGNVNNIIGPALIGK                                               | LYT   | rep2      |
| 775.7251  | 1549.4346 | 1549.8199 | 248.63           | 2      | 1.7   | 0.45        | AVGNVNNIIGPALIGK                                               | LYK   | rep2      |
| 1585.1583 | 4752.4515 | 4753.2663 | 171.42           | 3      | 3.21  | 1.71        | AVGNVNNIIGPALIGKDPTQQT AIDNFMVHELDGTQNEWGWCK : +57.05000 (C42) | LYT   | rep2      |
| 1585.1017 | 4752.2816 | 4753.2663 | 207.17           | 3      | 2.74  | 1.38        | AVGNVNNIIGPALIGKDPTQQT AIDNFMVHELDGTQNEWGWCK : +57.05000 (C42) | LYK   | rep1      |
| 1074.3453 | 3220.0125 | 3221.4612 | 449.69           | 3      | 6.36  | 4.17        | DPTQQT AIDNFMVHELDGTQNEWGWCK : +57.05000 (C26)                 | LYK   | rep1      |
| 1074.7582 | 3221.2511 | 3221.4612 | 65.23            | 3      | 4.57  | 2.6         | DPTQQT AIDNFMVHELDGTQNEWGWCK : +57.05000 (C26)                 | LYT   | rep1      |
| 840.9145  | 1679.8133 | 1680.8209 | 599.49           | 2      | 3.38  | 1.27        | GNPTVEVDIHTSNGIK                                               | LYT   | rep1      |
| 518.0979  | 1034.1802 | 1034.1739 | 6.07             | 2      | 3.11  | 1.36        | HIANLAGNPK                                                     | LYK   | rep3      |
| 517.9981  | 1033.9805 | 1034.1739 | 187.04           | 2      | 1.78  | 0.55        | HIANLAGNPK                                                     | LYT   | rep2      |
| 1003.023  | 2004.0303 | 2004.3011 | 135.12           | 2      | 2.89  | 1.32        | IVLPVPAFNVINGGSHAGNK                                           | LYK   | rep2      |
| 1002.7207 | 2003.4258 | 2004.3011 | 436.72           | 2      | 1.97  | 0.92        | IVLPVPAFNVINGGSHAGNK                                           | LYT   | rep2      |

|           |           |           |         |   |      |      |                                   |     |      |
|-----------|-----------|-----------|---------|---|------|------|-----------------------------------|-----|------|
| 410.9557  | 1229.8438 | 1229.4169 | 347.25  | 3 | 2.89 | 0.75 | KAGWGVMTSHR                       | LYK | rep3 |
| 410.8776  | 1229.6094 | 1229.4169 | 156.61  | 3 | 2.61 | 0.5  | KAGWGVMTSHR                       | LYT | rep2 |
| 927.8659  | 1853.7161 | 1853.2615 | 245.32  | 2 | 1.47 | 0.4  | LAMQEFMILPVGAASFKEAMK             | LYT | rep2 |
| 771.9559  | 2312.8443 | 2312.8242 | 8.7     | 3 | 3.04 | 1.12 | LAMQEFMILPVGAASFKEAMK             | LYK | rep3 |
| 771.6283  | 2311.8614 | 2312.8242 | 416.29  | 3 | 1.87 | 0.35 | LAMQEFMILPVGAASFKEAMK             | LYT | rep3 |
| 751.7813  | 1501.5469 | 1499.8228 | 1149.57 | 2 | 2.15 | 1.07 | LGANAILAVSLAVCK : +57.05000 (C14) | LYK | rep3 |
| 606.8026  | 1211.5896 | 1212.4261 | 689.94  | 2 | 3.07 | 1.29 | MGVEVYHHLK                        | LYK | rep2 |
| 607.0243  | 1212.033  | 1212.4261 | 324.26  | 2 | 3.06 | 1.38 | MGVEVYHHLK                        | LYT | rep2 |
| 1001.4683 | 3001.3813 | 3001.1838 | 65.8    | 3 | 3    | 1.37 | SFVAEYPIVSIE DPFQDDWEHYAK         | LYT | rep1 |
| 1501.3711 | 3000.7266 | 3001.1838 | 152.35  | 2 | 1.87 | 0.56 | SFVAEYPIVSIEDPFQDDWEHYAK          | LYK | rep2 |
| 1126.5865 | 2251.1573 | 2252.4409 | 569.89  | 2 | 2.85 | 1    | SGETEDTFIADLAVGLSTGQIK            | LYK | rep3 |
| 1126.8814 | 2251.7471 | 2252.4409 | 308.02  | 2 | 1.31 | 0.13 | SGETEDTFIADLAVGLSTGQIK            | LYT | rep1 |
| 1163.0677 | 2324.1197 | 2324.3826 | 113.1   | 2 | 3.68 | 1.4  | YGQDATNVGDEGGFAPNIQENK            | LYT | rep1 |
| 1036.4672 | 3106.378  | 3107.311  | 300.26  | 3 | 4.49 | 2.62 | YGQDATNVGDEGGFAPNIQENKEGLELLK     | LYK | rep1 |
| 1036.3373 | 3105.9884 | 3107.311  | 425.66  | 3 | 4.3  | 1.99 | YGQDATNVGDEGGFAPNIQENKEGLELLK     | LYT | rep2 |

**Matching Genes:**

[NP\\_181192.1](#) (LOS2 (Low expression of osmotically responsive genes 1); phosphopyruvate hydratase [Arabidopsis thaliana])

**Protein Group 10**

**Expression Quality:**

| Group                 | Group Probability | Num Peptides | % Seq Coverage | Num Spectra |
|-----------------------|-------------------|--------------|----------------|-------------|
| Total (Non-Redundant) | 1                 | 15           | 29.65          | 102.0       |

**Peptides:**

| Observed | Mr(expt)  | Mr(calc)  | Mass Error (ppm) | Charge | Score | Score Delta | Peptide      | Group | Replicate |
|----------|-----------|-----------|------------------|--------|-------|-------------|--------------|-------|-----------|
| 514.8502 | 1541.5272 | 1540.7486 | 505.3            | 3      | 3.91  | 1.5         | ARFEELNMDLFR | LYT   | rep2      |
| 771.6419 | 1541.2681 | 1540.7486 | 337.15           | 2      | 3.42  | 1.57        | ARFEELNMDLFR | LYK   | rep3      |

|           |           |           |         |   |      |      |                                            |     |      |
|-----------|-----------|-----------|---------|---|------|------|--------------------------------------------|-----|------|
| 838.6761  | 1675.3365 | 1675.6749 | 201.98  | 2 | 3.11 | 1.34 | ATAGDTHLGGEDFDNR                           | LYT | rep1 |
| 838.4655  | 1674.9153 | 1675.6749 | 453.31  | 2 | 3.09 | 1.66 | ATAGDTHLGGEDFDNR                           | LYK | rep1 |
| 616.1834  | 1230.3511 | 1230.3071 | 35.76   | 2 | 1.52 | 0.49 | FSDSSVQSDMK                                | LYT | rep2 |
| 863.955   | 2588.8414 | 2588.8157 | 9.92    | 3 | 2.19 | 0.53 | GEGPAIGIDLGTTYSCVGVWQHDR : +57.05000 (C16) | LYT | rep1 |
| 863.8718  | 2588.592  | 2588.8157 | 86.41   | 3 | 1.7  | 0.5  | GEGPAIGIDLGTTYSCVGVWQHDR : +57.05000 (C16) | LYK | rep2 |
| 830.6215  | 1659.2273 | 1659.8848 | 396.07  | 2 | 3.39 | 1.6  | IINEPTAAAIAYGLDK                           | LYT | rep1 |
| 894.5905  | 1787.1653 | 1788.0577 | 499.09  | 2 | 3.68 | 2.05 | IINEPTAAAIAYGLDKK                          | LYT | rep1 |
| 894.6775  | 1787.3394 | 1788.0577 | 401.74  | 2 | 3.09 | 1.74 | IINEPTAAAIAYGLDKK                          | LYK | rep1 |
| 912.1868  | 1822.3579 | 1823.1255 | 421     | 2 | 3.45 | 1.79 | IQAGPADKPMIYVEYK                           | LYK | rep2 |
| 608.6407  | 1822.8988 | 1823.1255 | 124.35  | 3 | 1.69 | 0.06 | IQAGPADKPMIYVEYK                           | LYT | rep1 |
| 1575.388  | 3148.7603 | 3149.3447 | 185.57  | 2 | 3.97 | 2.65 | KIEDSIEQAIQWLEGNQLAEAEDEFEDK               | LYT | rep1 |
| 1050.5717 | 3148.6915 | 3149.3447 | 207.42  | 3 | 1.61 | 0.07 | KIEDSIEQAIQWLEGNQLAEAEDEFEDK               | LYK | rep3 |
| 901.6586  | 1801.3015 | 1801.0383 | 146.16  | 2 | 3.66 | 1.96 | MDKSTVHDVVLVGGSTR                          | LYT | rep2 |
| 601.2782  | 1800.8111 | 1801.0383 | 126.15  | 3 | 1.54 | 0.37 | MDKSTVHDVVLVGGSTR                          | LYK | rep1 |
| 550.451   | 1648.3297 | 1645.9881 | 1422.58 | 3 | 3.63 | 1.8  | MKELESICNPIIAK : +57.05000 (C8)            | LYT | rep3 |
| 639.9811  | 1277.9466 | 1278.4846 | 420.84  | 2 | 3.06 | 1.48 | MVNHFVQEFK                                 | LYK | rep3 |
| 640.4624  | 1278.9092 | 1278.4846 | 332.12  | 2 | 2.97 | 1.31 | MVNHFVQEFK                                 | LYT | rep2 |
| 717.9392  | 1433.8628 | 1434.671  | 563.32  | 2 | 3.01 | 1.05 | MVNHFVQEFKR                                | LYK | rep1 |
| 717.9734  | 1433.9312 | 1434.671  | 515.67  | 2 | 2.68 | 1.24 | MVNHFVQEFKR                                | LYT | rep3 |
| 602.4823  | 1804.4234 | 1804.0439 | 210.36  | 3 | 2.71 | 0.51 | NQVAMNPVNTVFDAGR                           | LYK | rep1 |
| 602.3204  | 1803.9378 | 1804.0439 | 58.82   | 3 | 2.2  | 0.58 | NQVAMNPVNTVFDAGR                           | LYT | rep1 |
| 714.1084  | 1426.2012 | 1426.5806 | 265.91  | 2 | 3.12 | 1.08 | STVHDVVLVGGSTR                             | LYT | rep1 |
| 714.0083  | 1426.001  | 1426.5806 | 406.25  | 2 | 2.74 | 0.78 | STVHDVVLVGGSTR                             | LYK | rep1 |
| 719.4934  | 1436.9712 | 1436.6169 | 246.62  | 2 | 3.96 | 2.09 | VQQLLQDFFNGK                               | LYT | rep1 |
| 718.9771  | 1435.9385 | 1436.6169 | 472.23  | 2 | 2.31 | 0.95 | VQQLLQDFFNGK                               | LYK | rep2 |

**Matching Genes:**

[NP\\_195870.1](#) (HSC70-1 (heat shock cognate 70 kDa protein 1); ATP binding [Arabidopsis thaliana])



**Protein Group 11****Expression Quality:**

| Group                 | Group Probability | Num Peptides | % Seq Coverage | Num Spectra |
|-----------------------|-------------------|--------------|----------------|-------------|
| Total (Non-Redundant) | 1                 | 13           | 40.98          | 145.0       |

**Peptides:**

| Observed  | Mr(expt)  | Mr(calc)  | Mass Error (ppm) | Charge | Score | Score Delta | Peptide                                                   | Group | Replicate |
|-----------|-----------|-----------|------------------|--------|-------|-------------|-----------------------------------------------------------|-------|-----------|
| 336.8035  | 1007.3869 | 1007.1453 | 239.9            | 3      | 2.89  | 0.46        | ARYDEIHK                                                  | LYK   | rep2      |
| 336.8     | 1007.3765 | 1007.1453 | 229.53           | 3      | 2.48  | 0.44        | ARYDEIHK                                                  | LYT   | rep2      |
| 433.893   | 1298.6555 | 1298.5355 | 92.43            | 3      | 3.09  | 0.58        | EHALLAFTLGVK                                              | LYK   | rep1      |
| 649.9554  | 1297.8951 | 1298.5355 | 493.21           | 2      | 2.86  | 1.15        | EHALLAFTLGVK                                              | LYT   | rep2      |
| 545.9435  | 1634.807  | 1634.8834 | 46.76            | 3      | 3.93  | 1.8         | FHINIVVIGHVDSGK                                           | LYK   | rep2      |
| 546.0201  | 1635.0369 | 1634.8834 | 93.91            | 3      | 3.74  | 1.9         | FHINIVVIGHVDSGK                                           | LYT   | rep2      |
| 913.0785  | 2736.212  | 2737.1289 | 334.98           | 3      | 5.21  | 3.28        | FHINIVVIGHVDSGKSTTTGHLIYK                                 | LYK   | rep3      |
| 913.1637  | 2736.4676 | 2737.1289 | 241.6            | 3      | 3.72  | 2.22        | FHINIVVIGHVDSGKSTTTGHLIYK                                 | LYT   | rep1      |
| 1273.4076 | 3817.1993 | 3819.3041 | 551.1            | 3      | 7.03  | 4.39        | GAANFTSQVIIMNHPGQIGNGYAPVLDCHTSHIAVK :<br>+57.05000 (C28) | LYK   | rep3      |
| 1274.3656 | 3820.0733 | 3819.3041 | 201.4            | 3      | 5.55  | 3.39        | GAANFTSQVIIMNHPGQIGNGYAPVLDCHTSHIAVK<br>:+57.05000 (C28)  | LYT   | rep3      |
| 513.5882  | 1025.1607 | 1025.207  | 45.2             | 2      | 2.64  | 1.33        | IGGIGTVPVGR                                               | LYT   | rep1      |
| 513.4573  | 1024.899  | 1025.207  | 300.48           | 2      | 1.97  | 0.81        | IGGIGTVPVGR                                               | LYK   | rep2      |
| 1140.8059 | 2279.5962 | 2280.6724 | 471.85           | 2      | 4.02  | 2.26        | MTPTKPMVVETFSEYPPLGR                                      | LYK   | rep3      |
| 1141.1609 | 2280.3062 | 2280.6724 | 160.55           | 2      | 3.48  | 1.84        | MTPTKPMVVETFSEYPPLGR                                      | LYT   | rep2      |
| 458.0985  | 914.1813  | 914.1045  | 83.98            | 2      | 1.58  | 0.35        | QTVAVGVK                                                  | LYT   | rep2      |
| 457.9198  | 913.824   | 914.1045  | 306.89           | 2      | 1.04  | 0.12        | QTVAVGVK                                                  | LYK   | rep2      |

|           |           |           |        |   |      |      |                                   |     |      |
|-----------|-----------|-----------|--------|---|------|------|-----------------------------------|-----|------|
| 560.8445  | 1119.6734 | 1120.2604 | 523.98 | 2 | 2.47 | 1.08 | STTTGHLIYK                        | LYK | rep2 |
| 560.9275  | 1119.8394 | 1120.2604 | 375.78 | 2 | 2.45 | 1.11 | STTTGHLIYK                        | LYT | rep3 |
| 1262.3023 | 2522.5889 | 2522.7988 | 83.21  | 2 | 3.01 | 1.29 | SVEMHHESLLEALPGDNVGFNVK           | LYT | rep1 |
| 1261.6155 | 2521.2154 | 2522.7988 | 627.66 | 2 | 2.52 | 0.99 | SVEMHHESLLEALPGDNVGFNVK           | LYK | rep1 |
| 1253.8904 | 2505.7652 | 2506.9873 | 487.49 | 2 | 4.53 | 2.68 | VETGMIKPGMVVTFAPTGLTTEVK          | LYT | rep1 |
| 1253.5916 | 2505.1675 | 2506.9873 | 725.88 | 2 | 4.05 | 2.07 | VETGMIKPGMVVTFAPTGLTTEVK          | LYK | rep3 |
| 484.7415  | 1451.2009 | 1451.6105 | 282.16 | 3 | 3.71 | 1.77 | YYCTVIDAPGHR : +57.05000 (C3)     | LYK | rep1 |
| 484.74    | 1451.1965 | 1451.6105 | 285.18 | 3 | 3.24 | 1.62 | YYCTVIDAPGHR : +57.05000 (C3)     | LYT | rep2 |
| 652.4357  | 1954.2835 | 1955.2042 | 470.88 | 3 | 2    | 0.68 | YYCTVIDAPGHRDFIK : +57.05000 (C3) | LYK | rep1 |

**Matching Genes:**

[NP\\_001030993.1](#) (calmodulin binding / translation elongation factor [Arabidopsis thaliana])

**Protein Group 12**

**Expression Quality:**

| Group                 | Group Probability | Num Peptides | % Seq Coverage | Num Spectra |
|-----------------------|-------------------|--------------|----------------|-------------|
| Total (Non-Redundant) | 1                 | 13           | 45.55          | 117.0       |

**Peptides:**

| Observed | Mr(expt)  | Mr(calc)  | Mass Error (ppm) | Charge | Score | Score Delta | Peptide          | Group | Replicate |
|----------|-----------|-----------|------------------|--------|-------|-------------|------------------|-------|-----------|
| 845.1508 | 1688.2859 | 1688.8815 | 352.62           | 2      | 2.21  | 0.92        | DDPDFTWEVVKPLK   | LYT   | rep3      |
| 651.9922 | 1301.9688 | 1302.5672 | 459.45           | 2      | 2.92  | 0.53        | EHVIKPIPEK       | LYK   | rep3      |
| 651.9019 | 1301.7881 | 1302.5672 | 598.15           | 2      | 2.75  | 0.77        | EHVIKPIPEK       | LYT   | rep1      |
| 728.3991 | 1454.7825 | 1453.6077 | 808.23           | 2      | 3.79  | 1.63        | FVIGGPHGDAGLTGR  | LYK   | rep3      |
| 728.1792 | 1454.3428 | 1453.6077 | 505.75           | 2      | 3.35  | 1.6         | FVIGGPHGDAGLTGR  | LYT   | rep2      |
| 791.2668 | 1580.5179 | 1581.7805 | 798.24           | 2      | 3.21  | 0.97        | FVIGGPHGDAGLTGRK | LYK   | rep3      |

|           |           |           |        |   |      |      |                                    |     |      |
|-----------|-----------|-----------|--------|---|------|------|------------------------------------|-----|------|
| 791.6436  | 1581.2715 | 1581.7805 | 321.78 | 2 | 3.16 | 1.24 | FVIGGPHGDAGLTGRK                   | LYT | rep1 |
| 1203.2942 | 2404.5728 | 2405.6301 | 439.52 | 2 | 2.89 | 1.58 | IIIDTYGGWGAHGGGAFSGKDPTK           | LYT | rep3 |
| 802.4052  | 2404.192  | 2405.6301 | 597.82 | 3 | 1.32 | 0.22 | IIIDTYGGWGAHGGGAFSGKDPTK           | LYK | rep2 |
| 698.3312  | 2091.9701 | 2092.3223 | 168.33 | 3 | 4.54 | 2.5  | KIIIDTYGGWGAHGGGAFSGK              | LYK | rep3 |
| 698.36    | 2092.0565 | 2092.3223 | 127.02 | 3 | 3.98 | 2.12 | KIIIDTYGGWGAHGGGAFSGK              | LYT | rep3 |
| 1229.2357 | 3684.6837 | 3685.0769 | 106.7  | 3 | 7.66 | 5.51 | RPEDIGAGDQGHMFGYATDETPELMPLSHVLATK | LYK | rep3 |
| 1229.1156 | 3684.3233 | 3685.0769 | 204.49 | 3 | 6.2  | 4.42 | RPEDIGAGDQGHMFGYATDETPELMPLSHVLATK | LYT | rep2 |
| 490.5493  | 979.0829  | 979.0537  | 29.85  | 2 | 2.05 | 0.91 | TAAYGHFGR                          | LYK | rep3 |
| 490.4787  | 978.9418  | 979.0537  | 114.28 | 2 | 1.93 | 0.84 | TAAYGHFGR                          | LYT | rep3 |
| 571.6226  | 1141.2295 | 1141.2845 | 48.2   | 2 | 2.04 | 0.53 | TIFHLNPSGR                         | LYK | rep2 |
| 571.6031  | 1141.1905 | 1141.2845 | 82.42  | 2 | 1.96 | 0.91 | TIFHLNPSGR                         | LYT | rep3 |
| 736.0699  | 1470.1241 | 1470.7601 | 432.47 | 2 | 2.1  | 0.89 | TNMVMVFGEITTK                      | LYT | rep2 |
| 793.6173  | 2377.8285 | 2378.5613 | 308.09 | 3 | 4.17 | 2.52 | VHTVLISTQHDETVTNDEIAR              | LYT | rep1 |
| 793.7158  | 2378.124  | 2378.5613 | 183.84 | 3 | 3.92 | 2.24 | VHTVLISTQHDETVTNDEIAR              | LYK | rep2 |
| 807.3811  | 2419.1198 | 2417.6855 | 593.25 | 3 | 4.21 | 2.1  | VLVNIEQQSPDIAQGVHGHFTK             | LYK | rep3 |
| 1209.4173 | 2416.8189 | 2417.6855 | 358.46 | 2 | 4.04 | 2.52 | VLVNIEQQSPDIAQGVHGHFTK             | LYT | rep3 |
| 888.7388  | 1775.4619 | 1775.9656 | 283.57 | 2 | 3.1  | 1.77 | YLDDKTIFHLNPSGR                    | LYT | rep2 |
| 888.5652  | 1775.1148 | 1775.9656 | 479.05 | 2 | 3.08 | 1.39 | YLDDKTIFHLNPSGR                    | LYK | rep1 |

**Matching Genes:**

[NP\\_001078345.1](#) (MAT2/SAM-2 (S-adenosylmethionine synthetase 2) [Arabidopsis thaliana])

**Protein Group 13**

**Expression Quality:**

| Group                 | Group Probability | Num Peptides | % Seq Coverage | Num Spectra |
|-----------------------|-------------------|--------------|----------------|-------------|
| Total (Non-Redundant) | 1                 | 13           | 63.97          | 141.0       |

**Peptides:**

| Observed  | Mr(expt)  | Mr(calc)  | Mass Error (ppm) | Charge | Score | Score Delta | Peptide                                      | Group | Replicate |
|-----------|-----------|-----------|------------------|--------|-------|-------------|----------------------------------------------|-------|-----------|
| 953.2391  | 2856.6939 | 2857.2551 | 196.41           | 3      | 6.23  | 3.01        | ALSDHHVLLLEGTLKPNMVTPGSDSPK                  | LYK   | rep3      |
| 953.2686  | 2856.7822 | 2857.2551 | 165.52           | 3      | 4.88  | 2.17        | ALSDHHVLLLEGTLKPNMVTPGSDSPK                  | LYT   | rep2      |
| 763.605   | 1525.1944 | 1525.6225 | 280.66           | 2      | 2.79  | 1.03        | ANSEATLGTYKGDAAK                             | LYT   | rep1      |
| 763.6763  | 1525.3369 | 1525.6225 | 187.2            | 2      | 2.74  | 1.25        | ANSEATLGTYKGDAAK                             | LYK   | rep1      |
| 1456.0122 | 2910.0088 | 2910.3948 | 132.63           | 2      | 1.83  | 0.66        | ELLFTAPGALPCLSGVILFEETLYQK : +57.05000 (C12) | LYT   | rep3      |
| 970.5138  | 2908.5179 | 2910.3948 | 644.91           | 3      | 1.32  | 0.03        | ELLFTAPGALPCLSGVILFEETLYQK : +57.05000 (C12) | LYK   | rep3      |
| 745.5463  | 1489.0769 | 1488.6485 | 287.77           | 2      | 3.42  | 1.57        | GILAADESTGTIGKR                              | LYT   | rep1      |
| 745.0983  | 1488.1809 | 1488.6485 | 314.11           | 2      | 2.99  | 1.08        | GILAADESTGTIGKR                              | LYK   | rep1      |
| 741.8514  | 2222.5308 | 2223.3247 | 357.06           | 3      | 4.42  | 2.28        | IGENEPSEHSIHENAYGLAR                         | LYK   | rep3      |
| 1112.2039 | 2222.3921 | 2223.3247 | 419.45           | 2      | 3.49  | 1.81        | IGENEPSEHSIHENAYGLAR                         | LYT   | rep1      |
| 438.3591  | 1312.0537 | 1311.4928 | 427.72           | 3      | 3.78  | 1.43        | KPWSLSFSFGR                                  | LYT   | rep3      |
| 438.5678  | 1312.68   | 1311.4928 | 905.2            | 3      | 3.18  | 1.13        | KPWSLSFSFGR                                  | LYK   | rep2      |
| 807.9768  | 1613.938  | 1614.7657 | 512.59           | 2      | 2.04  | 0.02        | LASINVENVETNRR                               | LYK   | rep3      |
| 539.3883  | 1615.1414 | 1614.7657 | 232.67           | 3      | 1.75  | 0.4         | LASINVENVETNRR                               | LYT   | rep2      |
| 399.9986  | 1196.9723 | 1196.3153 | 549.2            | 3      | 2.98  | 1.14        | LGDGAAESLHVK                                 | LYK   | rep1      |
| 399.8619  | 1196.5622 | 1196.3153 | 206.35           | 3      | 2.86  | 1.32        | LGDGAAESLHVK                                 | LYT   | rep3      |
| 808.1398  | 1614.264  | 1614.7657 | 310.75           | 2      | 3.77  | 2.22        | RLASINVENVETNR                               | LYT   | rep3      |
| 808.0476  | 1614.0796 | 1614.7657 | 424.9            | 2      | 3.37  | 1.39        | RLASINVENVETNR                               | LYK   | rep2      |
| 1165.3269 | 2328.6382 | 2329.5718 | 400.74           | 2      | 2.61  | 1.04        | TVPAAVPAIVFLSGGQSEEEATR                      | LYT   | rep2      |
| 869.4382  | 2605.2912 | 2605.7314 | 168.94           | 3      | 4.15  | 0.65        | VDKGTVELAGTDGETTTQGLDGLGDR                   | LYT   | rep2      |
| 869.6916  | 2606.0515 | 2605.7314 | 122.82           | 3      | 3.4   | 0.49        | VDKGTVELAGTDGETTTQGLDGLGDR                   | LYK   | rep1      |
| 669.4868  | 1336.958  | 1336.499  | 343.46           | 2      | 2.58  | 1.11        | VSPEVIAEHTVR                                 | LYK   | rep3      |
| 446.5277  | 1336.5597 | 1336.499  | 45.37            | 3      | 2.21  | 0.89        | VSPEVIAEHTVR                                 | LYT   | rep1      |
| 1045.8964 | 3134.6656 | 3136.5436 | 598.73           | 3      | 3.54  | 1.31        | YAVICQENGLVPIVEPEILVDGSHDIQK : +57.05000(C5) | LYK   | rep3      |

|           |           |           |        |   |      |      |                                                  |     |      |
|-----------|-----------|-----------|--------|---|------|------|--------------------------------------------------|-----|------|
| 1046.0453 | 3135.1124 | 3136.5436 | 456.29 | 3 | 2.72 | 1.43 | YAVICQENGLVPIVEPEILVDGSHDIQK :<br>+57.05000 (C5) | LYT | rep1 |
|-----------|-----------|-----------|--------|---|------|------|--------------------------------------------------|-----|------|

**Matching Genes:**

[NP\\_190861.1](#) (fructose-bisphosphate aldolase, putative [Arabidopsis thaliana])

**Protein Group 14**

**Expression Quality:**

| Group                 | Group Probability | Num Peptides | % Seq Coverage | Num Spectra |
|-----------------------|-------------------|--------------|----------------|-------------|
| Total (Non-Redundant) | 1                 | 14           | 38.6           | 72.0        |

**Peptides:**

| Observed  | Mr(expt)  | Mr(calc)  | Mass Error (ppm) | Charge | Score | Score Delta | Peptide                      | Group | Replicate |
|-----------|-----------|-----------|------------------|--------|-------|-------------|------------------------------|-------|-----------|
| 1360.6526 | 2719.2896 | 2719.8662 | 212              | 2      | 4.12  | 1.9         | AHGTAVGLPSEDDMGNSEVGHNALGAGR | LYT   | rep1      |
| 907.4272  | 2719.2583 | 2719.8662 | 223.52           | 3      | 3.81  | 2.33        | AHGTAVGLPSEDDMGNSEVGHNALGAGR | LYK   | rep1      |
| 774.6839  | 1547.3521 | 1547.6267 | 177.44           | 2      | 2.18  | 0.89        | ALEYEDFDKFDR                 | LYK   | rep1      |
| 1153.972  | 2305.9283 | 2305.5469 | 165.43           | 2      | 3.73  | 2.02        | DVLDGSSVGFVETLEADLVALR       | LYK   | rep3      |
| 741.737   | 1481.4583 | 1481.6212 | 109.96           | 2      | 2.91  | 1.37        | FGHVTFWNGNR                  | LYT   | rep3      |
| 494.8489  | 1481.5233 | 1481.6212 | 66.05            | 3      | 2.88  | 0.73        | FGHVTFWNGNR                  | LYK   | rep2      |
| 659.4039  | 1975.1883 | 1975.1953 | 3.54             | 3      | 2.48  | 0.84        | GIYVVTADHGNAEDMVKR           | LYT   | rep1      |
| 659.1625  | 1974.4639 | 1975.1953 | 370.27           | 3      | 2.03  | 0.6         | GIYVVTADHGNAEDMVKR           | LYK   | rep2      |
| 470.3806  | 1408.1182 | 1407.5358 | 413.8            | 3      | 1.77  | 0.4         | GWDAQVLGEAPHK                | LYK   | rep2      |
| 704.7517  | 1407.4878 | 1407.5358 | 34.05            | 2      | 1.17  | 0.18        | GWDAQVLGEAPHK                | LYT   | rep3      |
| 620.2842  | 1238.5528 | 1238.397  | 125.82           | 2      | 2.44  | 0.95        | HGAPDTWTLIK                  | LYT   | rep3      |
| 620.4702  | 1238.9248 | 1238.397  | 426.26           | 2      | 2.18  | 1           | HGAPDTWTLIK                  | LYK   | rep2      |
| 394.2063  | 1179.5954 | 1179.3774 | 184.84           | 3      | 2.21  | 0.42        | IRVHILTDGR                   | LYT   | rep2      |
| 394.2375  | 1179.6892 | 1179.3774 | 264.33           | 3      | 2.13  | 0.47        | IRVHILTDGR                   | LYK   | rep2      |
| 768.7211  | 2303.1397 | 2303.5327 | 170.6            | 3      | 2.04  | 0.37        | KEPGANDQYLPPFVIVDESGK        | LYT   | rep3      |

|          |           |           |         |   |      |      |                               |     |      |
|----------|-----------|-----------|---------|---|------|------|-------------------------------|-----|------|
| 880.3944 | 2638.1598 | 2637.1404 | 386.55  | 3 | 6.23 | 3.87 | LQILTSHTLKPVPVIAIGGPGLAQGVR   | LYK | rep3 |
| 879.8768 | 2636.607  | 2637.1404 | 202.25  | 3 | 5.38 | 3.17 | LQILTSHTLKPVPVIAI GGPGGLAQGVR | LYT | rep1 |
| 522.3303 | 1563.9675 | 1563.7222 | 156.89  | 3 | 3.07 | 0.57 | RGWDAQVLGEAPHK                | LYK | rep2 |
| 522.0721 | 1563.193  | 1563.7222 | 338.42  | 3 | 2.53 | 0.56 | RGWDAQVLGEAPHK                | LYT | rep3 |
| 456.514  | 911.0124  | 910.0328  | 1076.45 | 2 | 1.76 | 0.26 | VHILTDGR                      | LYK | rep3 |
| 455.7619 | 909.5082  | 910.0328  | 576.47  | 2 | 1.32 | 0.24 | VHILTDGR                      | LYT | rep3 |
| 614.8561 | 1841.5448 | 1841.1009 | 241.06  | 3 | 3.78 | 1.83 | YAGMLQYDGELKLPSR              | LYK | rep1 |
| 614.6123 | 1840.8134 | 1841.1009 | 156.16  | 3 | 2.7  | 1.23 | YAGMLQYDGELKLPSR              | LYT | rep2 |
| 907.0024 | 2717.9838 | 2717.9514 | 11.94   | 3 | 4.7  | 3.1  | YVSESFETNTLHLVGLLSDGGVHSR     | LYT | rep3 |
| 907.0797 | 2718.2157 | 2717.9514 | 97.23   | 3 | 3.01 | 1.6  | YVSESFETNTLHLVGLLSDGGVHSR     | LYK | rep2 |

**Matching Genes:**

[NP\\_563852.1](#) (2,3-biphosphoglycerate-independent phosphoglycerate mutase, putative / phosphoglyceromutase, putative [Arabidopsis thaliana])

**Protein Group 15**

**Expression Quality:**

| Group                 | Group Probability | Num Peptides | % Seq Coverage | Num Spectra |
|-----------------------|-------------------|--------------|----------------|-------------|
| Total (Non-Redundant) | 1                 | 13           | 34.54          | 81.0        |

**Peptides:**

| Observed | Mr(expt)  | Mr(calc)  | Mass Error (ppm) | Charge | Score | Score Delta | Peptide                     | Group | Replicate |
|----------|-----------|-----------|------------------|--------|-------|-------------|-----------------------------|-------|-----------|
| 795.5668 | 2383.6768 | 2382.6396 | 435.32           | 3      | 5.19  | 3.02        | EAYLVSHNLLNAHAEEVEVFR       | LYK   | rep2      |
| 795.1874 | 2382.5387 | 2382.6396 | 42.38            | 3      | 4.31  | 2.02        | EAYLVSHNLLNAHAEEVEVFR       | LYT   | rep3      |
| 576.7    | 1151.3843 | 1151.3146 | 60.58            | 2      | 2.91  | 1.3         | FGLYYVDFK                   | LYK   | rep1      |
| 576.6324 | 1151.2491 | 1151.3146 | 56.9             | 2      | 2.31  | 0.97        | FGLYYVDFK                   | LYT   | rep2      |
| 626.0041 | 1249.9925 | 1250.4297 | 349.68           | 2      | 3.31  | 1.14        | GPALWDIYCR : +57.05000 (C9) | LYK   | rep1      |
| 626.5528 | 1251.0899 | 1250.4297 | 527.95           | 2      | 2.89  | 0.71        | GPALWDIYCR : +57.05000 (C9) | LYT   | rep2      |

|           |           |           |        |   |      |      |                                   |     |      |
|-----------|-----------|-----------|--------|---|------|------|-----------------------------------|-----|------|
| 595.2228  | 1782.6449 | 1783.1313 | 272.78 | 3 | 2.92 | 1.57 | HLLAMNEAICIDKVR : +57.05000 (C10) | LYK | rep1 |
| 607.109   | 1818.3035 | 1818.0472 | 140.99 | 3 | 3.69 | 1.57 | IGIAHSPAWFEPHDLK                  | LYT | rep1 |
| 909.7252  | 1817.4348 | 1818.0472 | 336.83 | 2 | 3.67 | 1.72 | IGIAHSPAWFEPHDLK                  | LYK | rep2 |
| 954.6282  | 2860.861  | 2861.0976 | 82.7   | 3 | 4.86 | 2.89 | IGIAHSPAWFEPHDLKDSNDAPTCSR        | LYT | rep2 |
| 954.8585  | 2861.5521 | 2861.0976 | 158.83 | 3 | 4.83 | 3.13 | IGIAHSPAWFEPHDLKDSNDAPTCSR        | LYK | rep1 |
| 893.8068  | 1785.5979 | 1785.874  | 154.59 | 2 | 2.28 | 0.9  | LGTTDSVDVGTADHNRK                 | LYT | rep1 |
| 893.5917  | 1785.1678 | 1785.874  | 395.47 | 2 | 2.19 | 0.92 | LGTTDSVDVGTADHNRK                 | LYK | rep2 |
| 476.2345  | 95.04533  | 950.0107  | 465.9  | 2 | 2.05 | 0.49 | NLNTDAFR                          | LYT | rep1 |
| 475.9542  | 949.8927  | 950.0107  | 124.14 | 2 | 1.27 | 0.28 | NLNTDAFR                          | LYK | rep2 |
| 1078.3753 | 2154.7349 | 2155.4831 | 347.13 | 2 | 4.3  | 2.12 | NVDHSAIGSMPLTAALPVYAK             | LYK | rep1 |
| 719.8094  | 2156.4049 | 2155.4831 | 427.62 | 3 | 1.48 | 0.35 | NVDHSAIGSMPLTAALPVYAK             | LYT | rep3 |
| 1184.1438 | 2366.272  | 2365.6091 | 280.22 | 2 | 3.01 | 1.78 | NWITFNEPWVFAHAGYDLGK              | LYK | rep1 |
| 789.4596  | 2365.3553 | 2365.6091 | 107.29 | 3 | 1.81 | 0.63 | NWITFNEPWVFAHAGYDLGK              | LYT | rep3 |
| 865.1199  | 2592.3361 | 2592.9136 | 222.69 | 3 | 3.63 | 0.97 | VKNWITFNEPWVFAHAGYDLGK            | LYK | rep3 |
| 864.9205  | 2591.7381 | 2592.9136 | 453.33 | 3 | 2.47 | 1.06 | VKNWITFNEPWVFAHAGYDLGK            | LYT | rep2 |
| 1339.8677 | 2677.7198 | 2679.0869 | 510.3  | 2 | 2.34 | 0.81 | VLDFMLGWHLEPTTSGDYPQIMK           | LYT | rep1 |
| 1340.763  | 2679.5103 | 2679.0869 | 158.03 | 2 | 0.77 | 0.12 | VLDFMLGWHLEPTTSGDYPQIMK           | LYK | rep2 |
| 390.2817  | 1167.8216 | 1167.3805 | 377.83 | 3 | 2.93 | 0.58 | YKEDIQLMK                         | LYK | rep1 |
| 390.161   | 1167.4596 | 1167.3805 | 67.74  | 3 | 2.82 | 0.28 | YKEDIQLMK                         | LYT | rep2 |

**Matching Genes:**

[NP\\_176801.1](#) (beta-glucosidase (PSR3.2) [Arabidopsis thaliana])

**Protein Group 16**

**Expression Quality:**

| Group | Group Probability | Num Peptides | % Seq Coverage | Num Spectra |
|-------|-------------------|--------------|----------------|-------------|
|-------|-------------------|--------------|----------------|-------------|

|                       |   |    |       |       |
|-----------------------|---|----|-------|-------|
| Total (Non-Redundant) | 1 | 11 | 76.82 | 142.0 |
|-----------------------|---|----|-------|-------|

**Peptides:**

| Observed  | Mr(expt)  | Mr(calc)  | Mass Error (ppm) | Charge | Score | Score Delta | Peptide                           | Group | Replicate |
|-----------|-----------|-----------|------------------|--------|-------|-------------|-----------------------------------|-------|-----------|
| 720.5511  | 1439.0865 | 1439.5532 | 324.23           | 2      | 2.9   | 1.38        | EIDDENMAVTFR                      | LYT   | rep1      |
| 621.0298  | 1240.044  | 1240.4347 | 314.97           | 2      | 3.72  | 1.62        | GLEGHVMEQLK                       | LYK   | rep1      |
| 621.138   | 1240.2603 | 1240.4347 | 140.59           | 2      | 3.63  | 1.39        | GLEGHVMEQLK                       | LYT   | rep3      |
| 879.1857  | 1756.3557 | 1756.9809 | 355.84           | 2      | 5.13  | 2.49        | IWNYTCDGKPEVFK : +57.05000 (C6)   | LYK   | rep1      |
| 879.2616  | 1756.5076 | 1756.9809 | 269.41           | 2      | 4.3   | 2.35        | IWNYTCDGKPEVFK : +57.05000 (C6)   | LYT   | rep3      |
| 785.012   | 1568.0083 | 1568.6913 | 435.35           | 2      | 1.91  | 0.62        | QNDDMPEPSNYMK                     | LYT   | rep1      |
| 798.6231  | 1595.2305 | 1595.7395 | 318.97           | 2      | 3.59  | 1.68        | REIDDENMAVTFR                     | LYK   | rep1      |
| 798.3887  | 1594.7618 | 1595.7395 | 612.72           | 2      | 3.02  | 1.24        | REIDDENMAVTFR                     | LYT   | rep3      |
| 1140.1302 | 3417.3673 | 3418.6592 | 377.9            | 3      | 6.1   | 3.19        | SENHLFPDAIGHHIQGVTIHDGEWDSHGAIK   | LYK   | rep3      |
| 1140.2902 | 3417.847  | 3418.6592 | 237.57           | 3      | 5     | 2.59        | SENHLFPDAIGHHIQGVTIHDGEWDSHGAIK   | LYT   | rep2      |
| 657.9783  | 1313.941  | 1314.4704 | 402.82           | 2      | 1.5   | 0.42        | SLAADMDDHVLK                      | LYT   | rep3      |
| 659.2798  | 1316.544  | 1314.4704 | 1577.47          | 2      | 1.15  | 0.14        | SLAADMDDHVLK                      | LYK   | rep1      |
| 693.659   | 1385.3023 | 1385.5487 | 177.84           | 2      | 4.09  | 1.89        | SLAADMDDHVLKA                     | LYK   | rep1      |
| 693.3592  | 1384.7027 | 1385.5487 | 610.6            | 2      | 3.7   | 1.5         | SLAADMDDHVLKA                     | LYT   | rep1      |
| 474.253   | 946.4904  | 947.067   | 608.81           | 2      | 1.94  | 0.44        | SPDDIICK : +57.05000 (C7)         | LYT   | rep2      |
| 700.8826  | 1399.7495 | 1399.6383 | 79.49            | 2      | 5.38  | 2.43        | VYDVIFQFIQK                       | LYK   | rep1      |
| 701.343   | 1400.6704 | 1399.6383 | 737.44           | 2      | 4.68  | 2.42        | V YDVIFQFIQK                      | LYT   | rep2      |
| 1254.3524 | 3760.0338 | 3761.0564 | 271.89           | 3      | 6.31  | 4.08        | WRSENHLFPDAIGHHIQGVTIHDGEWDSHGAIK | LYK   | rep3      |
| 1254.4694 | 3760.3846 | 3761.0564 | 178.61           | 3      | 4.7   | 2.8         | WRSENHLFPDAIGHHIQGVTIHDGEWDSHGAIK | LYT   | rep3      |

**Matching Genes:**

[NP\\_565264.1](#) (major latex protein-related / MLP-related [Arabidopsis thaliana])



**Protein Group 17****Expression Quality:**

| Group                 | Group Probability | Num Peptides | % Seq Coverage | Num Spectra |
|-----------------------|-------------------|--------------|----------------|-------------|
| Total (Non-Redundant) | 1                 | 13           | 47.33          | 119.0       |

**Peptides:**

| Observed  | Mr(expt)  | Mr(calc)  | Mass Error (ppm) | Charge | Score | Score Delta | Peptide                                | Group | Replicate |
|-----------|-----------|-----------|------------------|--------|-------|-------------|----------------------------------------|-------|-----------|
| 832.4383  | 1662.8609 | 1662.844  | 10.16            | 2      | 3.26  | 1.71        | DDADFTWEVVKPLK                         | LYT   | rep1      |
| 832.2387  | 1662.4617 | 1662.844  | 229.89           | 2      | 1.39  | 0.27        | DDADFTWEVVKPLK                         | LYK   | rep2      |
| 645.0327  | 1288.0498 | 1288.5405 | 380.8            | 2      | 2.8   | 0.99        | EHVIKPIPEK                             | LYK   | rep3      |
| 645.0393  | 1288.063  | 1288.5405 | 370.57           | 2      | 2.63  | 1.16        | EHVIKPIPEK                             | LYT   | rep3      |
| 728.3991  | 1454.7825 | 1453.6077 | 808.23           | 2      | 3.79  | 1.63        | FVIGGPHGDAGLTGR                        | LYK   | rep3      |
| 728.1792  | 1454.3428 | 1453.6077 | 505.75           | 2      | 3.35  | 1.6         | FVIGGPHGDAGLTGR                        | LYT   | rep2      |
| 791.2668  | 1580.5179 | 1581.7805 | 798.24           | 2      | 3.21  | 0.97        | FVIGGPHGDAGLTGRK                       | LYK   | rep3      |
| 791.6436  | 1581.2715 | 1581.7805 | 321.78           | 2      | 3.16  | 1.24        | FVIGGPHGDAGLTGRK                       | LYT   | rep1      |
| 1203.2942 | 2404.5728 | 2405.6301 | 439.52           | 2      | 2.89  | 1.58        | IIIDTYGGWGAHGGGAFSGKDPTK               | LYT   | rep3      |
| 802.4052  | 2404.192  | 2405.6301 | 597.82           | 3      | 1.32  | 0.22        | III DTYGGWGAHGGGAFSGKDPTK              | LYK   | rep2      |
| 698.3312  | 2091.9701 | 2092.3223 | 168.33           | 3      | 4.54  | 2.5         | KIIDTYGGWGAHGGGAFSGK                   | LYK   | rep3      |
| 698.36    | 2092.0565 | 2092.3223 | 127.02           | 3      | 3.98  | 2.12        | KIIDTYGGWGAHGGGAFSGK                   | LYT   | rep3      |
| 1224.1554 | 3669.4427 | 3671.0901 | 448.74           | 3      | 5.28  | 0           | KPEEVGAGDQGHMFGYATDETPELMPL<br>THVLATK | LYT   | rep1      |
| 1224.2521 | 3669.7327 | 3671.0901 | 369.73           | 3      | 5.01  | 0.17        | KPEEVGAGDQGHMFGYATDETPELMPL<br>THVLATK | LYK   | rep2      |
| 437.5625  | 873.1094  | 873.0125  | 111.01           | 2      | 1.44  | 0.34        | SIVASGLAR                              | LYT   | rep2      |
| 490.5493  | 979.0829  | 979.0537  | 29.85            | 2      | 2.05  | 0.91        | TAA YGHFGR                             | LYK   | rep3      |
| 490.4787  | 978.9418  | 979.0537  | 114.28           | 2      | 1.93  | 0.84        | TAA YGHFGR                             | LYT   | rep3      |

|           |           |           |        |   |      |      |                          |     |      |
|-----------|-----------|-----------|--------|---|------|------|--------------------------|-----|------|
| 571.6226  | 1141.2295 | 1141.2845 | 48.2   | 2 | 2.04 | 0.53 | TIFHLNPSGR               | LYK | rep2 |
| 571.6031  | 1141.1905 | 1141.2845 | 82.42  | 2 | 1.96 | 0.91 | TIFHLNPSGR               | LYT | rep3 |
| 736.0699  | 1470.1241 | 1470.7601 | 432.47 | 2 | 2.1  | 0.89 | TNMVMVFGEITTK            | LYT | rep2 |
| 883.9004  | 2648.6777 | 2649.8721 | 450.72 | 3 | 5.18 | 2.81 | VHTVLISTQHDETVTNDEIAADLK | LYT | rep1 |
| 883.871   | 2648.5894 | 2649.8721 | 484.03 | 3 | 3.36 | 1.1  | VHTVLISTQHDETVTNDEIAADLK | LYK | rep3 |
| 1192.6863 | 2383.357  | 2383.6689 | 130.88 | 2 | 3.74 | 1.87 | VLVNIEQQSPDIAQGVHGLTK    | LYT | rep1 |
| 1192.3416 | 2382.6675 | 2383.6689 | 420.12 | 2 | 3.36 | 1.96 | VLVNIEQQSPDIAQGVHGLTK    | LYK | rep1 |

**Matching Genes:**

[NP\\_188365.1](#) (MTO3 (S-adenosylmethionine synthase 3); methionine adenosyltransferase [Arabidopsis thaliana])

**Protein Group 18**

**Expression Quality:**

| Group                 | Group Probability | Num Peptides | % Seq Coverage | Num Spectra |
|-----------------------|-------------------|--------------|----------------|-------------|
| Total (Non-Redundant) | 1                 | 12           | 29.2           | 73.0        |

**Peptides:**

| Observed  | Mr(expt)  | Mr(calc)  | Mass Error (ppm) | Charge | Score | Score Delta | Peptide                           | Group | Replicate |
|-----------|-----------|-----------|------------------|--------|-------|-------------|-----------------------------------|-------|-----------|
| 576.7     | 1151.3843 | 1151.3146 | 60.58            | 2      | 2.91  | 1.3         | FGLYYVDFK                         | LYK   | rep1      |
| 576.6324  | 1151.2491 | 1151.3146 | 56.9             | 2      | 2.31  | 0.97        | FGLYYVDFK                         | LYT   | rep2      |
| 469.6875  | 1406.039  | 1405.5997 | 312.54           | 3      | 2.44  | 0.1         | FYHDLIDELLK                       | LYT   | rep3      |
| 703.8228  | 1405.6299 | 1405.5997 | 21.48            | 2      | 1.17  | 0.14        | FYHDLIDELLK                       | LYK   | rep1      |
| 711.9137  | 2132.7176 | 2132.4245 | 137.43           | 3      | 4.79  | 0.26        | GVSQAGVKFYHDLIDELLK               | LYT   | rep3      |
| 1066.8892 | 2131.7627 | 2132.4245 | 310.36           | 2      | 4.39  | 0           | GVSQAGVKFYHDLIDELLK               | LYK   | rep1      |
| 595.2228  | 1782.6449 | 1783.1313 | 272.78           | 3      | 2.92  | 1.57        | HLLAMNEAICIDKVR : +57.05000 (C10) | LYK   | rep1      |
| 607.109   | 1818.3035 | 1818.0472 | 140.99           | 3      | 3.69  | 1.57        | IGIAHSPAWFEPHDLK                  | LYT   | rep1      |
| 909.7252  | 1817.4348 | 1818.0472 | 336.83           | 2      | 3.67  | 1.72        | IGIAHSPAWFEPHDLK                  | LYK   | rep2      |
| 963.5861  | 2887.7347 | 2889.1509 | 490.17           | 3      | 4.47  | 2.69        | IGIAHSPAWFEPHDLKDSNDVPTVSR        | LYT   | rep3      |

|           |           |           |        |   |      |      |                            |     |      |
|-----------|-----------|-----------|--------|---|------|------|----------------------------|-----|------|
| 963.7473  | 2888.2185 | 2889.1509 | 322.72 | 3 | 4.19 | 2.39 | IGIAHSPAWFEPHDLKDSNDVPTVSR | LYK | rep1 |
| 476.2345  | 950.4533  | 950.0107  | 465.9  | 2 | 2.05 | 0.49 | NLNTDAFR                   | LYT | rep1 |
| 475.9542  | 949.8927  | 950.0107  | 124.14 | 2 | 1.27 | 0.28 | NLNTDAFR                   | LYK | rep2 |
| 1076.8777 | 2151.7398 | 2152.4158 | 314.06 | 2 | 2.63 | 0.6  | NVDHSAIGSQPLTAALPVYAK      | LYT | rep1 |
| 785.0887  | 2352.2428 | 2351.5825 | 280.77 | 3 | 2.18 | 0.57 | NWITFNEPWVFAHAGYDVGK       | LYT | rep3 |
| 897.3314  | 2688.9708 | 2689.9429 | 361.37 | 3 | 5.48 | 3.27 | SGYEAYLVSHNLLNAHAEAVEVFR   | LYK | rep2 |
| 897.5004  | 2689.4776 | 2689.9429 | 172.95 | 3 | 4.99 | 2.53 | SGYEA YLVSHNLLNAHAEAVEVFR  | LYT | rep1 |
| 860.5209  | 2578.5391 | 2578.887  | 134.87 | 3 | 2.88 | 1.68 | VKNWITFNEPWVFAHAGYDVGK     | LYT | rep3 |
| 390.2817  | 1167.8216 | 1167.3805 | 377.83 | 3 | 2.93 | 0.58 | YKEDIQLMK                  | LYK | rep1 |
| 390.161   | 1167.4596 | 1167.3805 | 67.74  | 3 | 2.82 | 0.28 | YKEDIQLMK                  | LYT | rep2 |

**Matching Genes:**

[NP\\_176802.1](#) (glycosyl hydrolase family 1 protein [Arabidopsis thaliana])

---

**Protein Group 19**

**Expression Quality:**

| Group                 | Group Probability | Num Peptides | % Seq Coverage | Num Spectra |
|-----------------------|-------------------|--------------|----------------|-------------|
| Total (Non-Redundant) | 1                 | 11           | 69.2           | 69.0        |

**Peptides:**

| Observed  | Mr(expt)  | Mr(calc)  | Mass Error (ppm) | Charge | Score | Score Delta | Peptide                            | Group | Replicate |
|-----------|-----------|-----------|------------------|--------|-------|-------------|------------------------------------|-------|-----------|
| 806.6753  | 1611.335  | 1611.8865 | 342.12           | 2      | 4.15  | 2.01        | ALLDDPVFRPLVEK                     | LYK   | rep3      |
| 807.0657  | 1612.1158 | 1611.8865 | 142.25           | 2      | 3.01  | 1.76        | ALLDDPVFRPLVEK                     | LYT   | rep2      |
| 656.3063  | 1310.597  | 1309.4768 | 855.43           | 2      | 2.69  | 0.86        | DIVALSGAHTLGR                      | LYT   | rep1      |
| 929.7812  | 1857.5467 | 1858.1031 | 299.48           | 2      | 2.62  | 1.37        | ELLSGEKEGLLQLVSDK                  | LYK   | rep1      |
| 1212.9825 | 3635.9242 | 3637.0349 | 305.4            | 3      | 4.64  | 2.8         | EQFPTISFADFHQLAGVVAVEVTGGPDIPFHPGR | LYK   | rep3      |
| 1213.6439 | 3637.9083 | 3637.0349 | 240.14           | 3      | 2.84  | 1.39        | EQFPTISFADFHQLAGVVAVEVTGGPDIPFHPGR | LYT   | rep3      |
| 636.6277  | 1906.8596 | 1907.0593 | 104.73           | 3      | 4.61  | 2.01        | FDAEQAHGANSGIHIALR                 | LYK   | rep3      |

|           |           |           |        |   |      |      |                                          |     |      |
|-----------|-----------|-----------|--------|---|------|------|------------------------------------------|-----|------|
| 636.495   | 1906.4615 | 1907.0593 | 313.47 | 3 | 3.89 | 2.15 | FDAEQAHGANSQIHIHLR                       | LYT | rep3 |
| 546.3912  | 1636.1502 | 1635.7639 | 236.18 | 3 | 3.85 | 1.21 | LAWHSAGTFDCQSR : +57.05000 (C11)         | LYT | rep1 |
| 546.2661  | 1635.7749 | 1635.7639 | 6.71   | 3 | 2.89 | 0.83 | LAWHSAGTFDCQSR : +57.05000 (C11)         | LYK | rep2 |
| 1448.5753 | 4342.7025 | 4344.8994 | 505.63 | 3 | 3.8  | 1.8  | LLDPIREQFPTISFADFHQLAGVVAVEVTGGPDIPFHPGR | LYK | rep3 |
| 461.9553  | 1382.8423 | 1382.5497 | 211.66 | 3 | 1.77 | 0.31 | LPDATKGCDHLR : +57.05000 (C8)            | LYK | rep1 |
| 462.0024  | 1382.9837 | 1382.5497 | 313.9  | 3 | 1.24 | 0.04 | LPDATKGCDHLR : +57.05000 (C8)            | LYT | rep1 |
| 690.6708  | 2068.9889 | 2069.3518 | 175.39 | 3 | 3.57 | 1.7  | QMGLSDKDIVALSGAHTLGR                     | LYT | rep3 |
| 690.8693  | 2069.5843 | 2069.3518 | 112.36 | 3 | 3.19 | 1.57 | QMGLSDKDIVALSGAHTLGR                     | LYK | rep1 |
| 1141.3753 | 2280.7349 | 2280.4563 | 122.17 | 2 | 3.93 | 2.15 | SGFEGAWTSNPLIFDNSYFK                     | LYK | rep2 |
| 1140.7412 | 2279.4668 | 2280.4563 | 433.88 | 2 | 2.54 | 0.75 | SGFEGAWTSNPLIFDNSYFK                     | LYT | rep2 |
| 689.7015  | 2066.0811 | 2065.1843 | 434.26 | 3 | 3.45 | 1.92 | YAADEDAFFADYAEAAMK                       | LYT | rep2 |
| 689.4061  | 2065.1949 | 2065.1843 | 5.13   | 3 | 2.18 | 0.56 | YAADEDAFFADYAEAAMK                       | LYK | rep1 |

**Matching Genes:**

[NP\\_001030991.2](#) (APX1 (ASCORBATE PEROXIDASE 1, MATERNAL EFFECT EMBRYO ARREST 6); L-ascorbate peroxidase [Arabidopsis thaliana])

**Protein Group 20**

**Expression Quality:**

| Group                 | Group Probability | Num Peptides | % Seq Coverage | Num Spectra |
|-----------------------|-------------------|--------------|----------------|-------------|
| Total (Non-Redundant) | 1                 | 12           | 33.21          | 52.0        |

**Peptides:**

| Observed  | Mr(expt)  | Mr(calc)  | Mass Error (ppm) | Charge | Score | Score Delta | Peptide                        | Group | Replicate |
|-----------|-----------|-----------|------------------|--------|-------|-------------|--------------------------------|-------|-----------|
| 1360.6526 | 2719.2896 | 2719.8662 | 212              | 2      | 4.12  | 1.9         | AHGTAVGLPSEDDMGNSEVGHNALGAGR   | LYT   | rep1      |
| 907.4272  | 2719.2583 | 2719.8662 | 223.52           | 3      | 3.81  | 2.33        | AHGTAVGLPSEDDMGNSEVGHNALGAGR   | LYK   | rep1      |
| 966.1727  | 2895.4947 | 2896.3574 | 297.86           | 3      | 5.79  | 3.29        | EGNLQILTSHTLKPVPPIAIGGPGLSAGVR | LYK   | rep3      |
| 966.7714  | 2897.2906 | 2896.3574 | 322.2            | 3      | 1.63  | 0.28        | EGNLQILTSHTLKPVPPIAIGGPGLSAGVR | LYT   | rep1      |
| 741.737   | 1481.4583 | 1481.6212 | 109.96           | 2      | 2.91  | 1.37        | FGHVTFFWNGNR                   | LYT   | rep3      |

|           |           |           |         |   |      |      |                                        |     |      |
|-----------|-----------|-----------|---------|---|------|------|----------------------------------------|-----|------|
| 494.8489  | 1481.5233 | 1481.6212 | 66.05   | 3 | 2.88 | 0.73 | FGHVTFWNGNR                            | LYK | rep2 |
| 1422.077  | 4263.2076 | 4262.769  | 102.88  | 3 | 5.52 | 3.44 | FRQDIETPLANVAATVMNLHGFVAPSDYETSLIEVVEK | LYK | rep1 |
| 1421.6866 | 4262.0365 | 4262.769  | 171.85  | 3 | 4.39 | 2.45 | FRQDIETPLANVAATVMNLHGFVAPSDYETSLIEVVEK | LYT | rep2 |
| 573.6947  | 1718.0606 | 1717.9308 | 75.59   | 3 | 4.03 | 1.56 | GTVHLIGLLSDGGVHSR                      | LYT | rep3 |
| 859.3158  | 1716.616  | 1717.9308 | 765.32  | 2 | 1.75 | 0.33 | GTVHLIGLLSDGGVHSR                      | LYK | rep3 |
| 470.3806  | 1408.1182 | 1407.5358 | 413.8   | 3 | 1.77 | 0.4  | GWDAQVLGEAPHK                          | LYK | rep2 |
| 704.7517  | 1407.4878 | 1407.5358 | 34.05   | 2 | 1.17 | 0.18 | GWDAQVLGEAPHK                          | LYT | rep3 |
| 394.2063  | 1179.5954 | 1179.3774 | 184.84  | 3 | 2.21 | 0.42 | IRVHILTDR                              | LYT | rep2 |
| 394.2375  | 1179.6892 | 1179.3774 | 264.33  | 3 | 2.13 | 0.47 | IRVHILTDR                              | LYK | rep2 |
| 510.5836  | 1019.1515 | 1018.2145 | 920.3   | 2 | 1.7  | 0.39 | LADHPKLPK                              | LYT | rep1 |
| 522.3303  | 1563.9675 | 1563.7222 | 156.89  | 3 | 3.07 | 0.57 | RGWDAQVLGEAPHK                         | LYK | rep2 |
| 522.0721  | 1563.193  | 1563.7222 | 338.42  | 3 | 2.53 | 0.56 | RGWDAQVLGEAPHK                         | LYT | rep3 |
| 652.5635  | 1303.1114 | 1303.386  | 210.69  | 2 | 1.78 | 0.37 | TSGEYLAHNGVR                           | LYT | rep2 |
| 456.514   | 911.0124  | 910.0328  | 1076.45 | 2 | 1.76 | 0.26 | VHILTDR                                | LYK | rep3 |
| 455.7619  | 909.5082  | 910.0328  | 576.47  | 2 | 1.32 | 0.24 | VHILTDR                                | LYT | rep3 |
| 614.8561  | 1841.5448 | 1841.1009 | 241.06  | 3 | 3.78 | 1.83 | YAGMLQYDGELKLPSR                       | LYK | rep1 |
| 614.6123  | 1840.8134 | 1841.1009 | 156.16  | 3 | 2.7  | 1.23 | YAGMLQYDGELKLPSR                       | LYT | rep2 |

**Matching Genes:**

[NP\\_187471.1](#) (2,3-biphosphoglycerate-independent phosphoglycerate mutase, putative / phosphoglyceromutase, putative [Arabidopsis thaliana])

**Protein Group 21**

**Expression Quality:**

| Group                 | Group Probability | Num Peptides | % Seq Coverage | Num Spectra |
|-----------------------|-------------------|--------------|----------------|-------------|
| Total (Non-Redundant) | 1                 | 13           | 33.05          | 120.0       |

**Peptides:**

| Observed | Mr(expt) | Mr(calc) | Mass Error (ppm) | Charge | Score | Score Delta | Peptide | Group | Replicate |
|----------|----------|----------|------------------|--------|-------|-------------|---------|-------|-----------|
|----------|----------|----------|------------------|--------|-------|-------------|---------|-------|-----------|

|           |           |           |        |   |      |      |                                             |     |      |
|-----------|-----------|-----------|--------|---|------|------|---------------------------------------------|-----|------|
| 1631.7174 | 4892.1287 | 4892.3857 | 52.53  | 3 | 3.63 | 1.91 | EHGKPTLLGFEEFELDYPSEYITAVDGTYDAIFGNEPIVNMLR | LYK | rep1 |
| 1631.579  | 4891.7135 | 4892.3857 | 137.41 | 3 | 3.56 | 1.75 | EHGKPTLLGFEEFELDYPSEYITAVDGTYDAIFGNEPIVNMLR | LYT | rep2 |
| 534.9366  | 1067.8575 | 1068.2734 | 389.38 | 2 | 2.56 | 1.12 | FGVHVAPITK                                  | LYK | rep2 |
| 357.1976  | 1068.5692 | 1068.2734 | 276.91 | 3 | 2.33 | 0.7  | FGVHVAPITK                                  | LYT | rep1 |
| 554.1166  | 1106.2176 | 1106.2768 | 53.58  | 2 | 2.05 | 0.5  | FTLQVQDKK                                   | LYK | rep2 |
| 553.9046  | 1105.7935 | 1106.2768 | 436.92 | 2 | 1.93 | 0.49 | FTLQVQDKK                                   | LYT | rep2 |
| 1173.1802 | 2344.3448 | 2345.6658 | 563.17 | 2 | 4.23 | 2.68 | IIGFHGFAGNHVNSIGAYFVPK                      | LYK | rep3 |
| 782.842   | 2345.5026 | 2345.6658 | 69.54  | 3 | 4.15 | 2.16 | IIGFHGFAGNHVNSIGAYFVPK                      | LYT | rep2 |
| 774.6418  | 1547.2679 | 1547.713  | 287.61 | 2 | 1.77 | 0.63 | IYASYGGEGIQYVK                              | LYT | rep2 |
| 825.4037  | 2473.1876 | 2473.8386 | 263.17 | 3 | 4.79 | 2.49 | KIIGFHGFAGNHVNSIGAYFVPK                     | LYK | rep3 |
| 825.4722  | 2473.393  | 2473.8386 | 180.12 | 3 | 3.79 | 1.65 | KIIGFHGFAGNHVNSIGAYFVPK                     | LYT | rep2 |
| 1034.7937 | 2067.5718 | 2068.2956 | 349.96 | 2 | 4.47 | 2.3  | KVSVGQAQDGIGAVSFVYDK                        | LYT | rep2 |
| 1034.7991 | 2067.5826 | 2068.2956 | 344.77 | 2 | 4.32 | 2.62 | KVSVGQAQDGIGAVSFVYDK                        | LYK | rep2 |
| 751.2559  | 2250.7441 | 2251.3747 | 280.11 | 3 | 2.04 | 0.54 | LEGAGSEAGTLWDDGAFDGVK                       | LYT | rep1 |
| 777.4976  | 1552.9795 | 1553.8038 | 530.5  | 2 | 2.13 | 0.6  | NFGVDTVVTTLIFK                              | LYT | rep2 |
| 604.7083  | 1207.4009 | 1207.255  | 120.87 | 2 | 1.72 | 0.58 | NGSQVVFVGD                                  | LYT | rep2 |
| 1496.4678 | 2990.92   | 2991.1807 | 87.15  | 2 | 3.08 | 1.5  | TLLGFEEFELESDEYITSVEGYEK                    | LYK | rep3 |
| 1496.0061 | 2989.9966 | 2991.1807 | 395.84 | 2 | 1.11 | 0.09 | TLLGFEEFELESDEYITSVEGYEK                    | LYT | rep3 |
| 1025.35   | 3073.0264 | 3073.4224 | 128.81 | 3 | 4.06 | 1.7  | VQLTFDEIHSIQVTYDGATALQSQLR                  | LYK | rep3 |
| 590.7557  | 1769.2437 | 1769.056  | 106.11 | 3 | 1.67 | 0.17 | VSIPFGIGAGTAFEFKK                           | LYK | rep2 |
| 590.734   | 1769.1785 | 1769.056  | 69.26  | 3 | 1.64 | 0    | VSIPFGIGAGTAFEFKK                           | LYT | rep3 |

**Matching Genes:**

[NP\\_188267.1](#) (jacalin lectin family protein [Arabidopsis thaliana])

**Protein Group 22**

**Expression Quality:**

| Group                 | Group Probability | Num Peptides | % Seq Coverage | Num Spectra |
|-----------------------|-------------------|--------------|----------------|-------------|
| Total (Non-Redundant) | 1                 | 12           | 44.27          | 111.0       |

**Peptides:**

| Observed  | Mr(expt)  | Mr(calc)  | Mass Error (ppm) | Charge | Score | Score Delta | Peptide                                             | Group | Replicate |
|-----------|-----------|-----------|------------------|--------|-------|-------------|-----------------------------------------------------|-------|-----------|
| 1235.3673 | 3703.0785 | 3703.111  | 8.78             | 3      | 3.38  | 1.51        | CPEEIGAGDQGHMFGYATDETPELMPLSHVLATK : +57.05000 (C1) | LYT   | rep1      |
| 845.1508  | 1688.2859 | 1688.8815 | 352.62           | 2      | 2.21  | 0.92        | DDPDFTWEVVKPLK                                      | LYT   | rep3      |
| 645.0327  | 1288.0498 | 1288.5405 | 380.8            | 2      | 2.8   | 0.99        | EHVIKPVIEK                                          | LYK   | rep3      |
| 645.0393  | 1288.063  | 1288.5405 | 370.57           | 2      | 2.63  | 1.16        | EHVIKPVIEK                                          | LYT   | rep3      |
| 728.3991  | 1454.7825 | 1453.6077 | 808.23           | 2      | 3.79  | 1.63        | FVIGGPHGDAGLTGR                                     | LYK   | rep3      |
| 728.1792  | 1454.3428 | 1453.6077 | 505.75           | 2      | 3.35  | 1.6         | FVIGGPHGDAGLTGR                                     | LYT   | rep2      |
| 791.2668  | 1580.5179 | 1581.7805 | 798.24           | 2      | 3.21  | 0.97        | FVIGGPHGDAGLTGRK                                    | LYK   | rep3      |
| 791.6436  | 1581.2715 | 1581.7805 | 321.78           | 2      | 3.16  | 1.24        | FVIGGPHGDAGLTGRK                                    | LYT   | rep1      |
| 1203.2942 | 2404.5728 | 2405.6301 | 439.52           | 2      | 2.89  | 1.58        | IIIDTYGGWGAHGGGAFSGKDPTK                            | LYT   | rep3      |
| 802.4052  | 2404.192  | 2405.6301 | 597.82           | 3      | 1.32  | 0.22        | IIIDTYGGWGAHGGGAFSGKDPTK                            | LYK   | rep2      |
| 698.3312  | 2091.9701 | 2092.3223 | 168.33           | 3      | 4.54  | 2.5         | KIIDTYGGWGAHGGGAFSGK                                | LYK   | rep3      |
| 698.36    | 2092.0565 | 2092.3223 | 127.02           | 3      | 3.98  | 2.12        | KIIDTYGGWGAHGGGAFSGK                                | LYT   | rep3      |
| 490.5493  | 979.0829  | 979.0537  | 29.85            | 2      | 2.05  | 0.91        | TAAYGHFGR                                           | LYK   | rep3      |
| 490.4787  | 978.9418  | 979.0537  | 114.28           | 2      | 1.93  | 0.84        | TAAYGHFGR                                           | LYT   | rep3      |
| 571.6226  | 1141.2295 | 1141.2845 | 48.2             | 2      | 2.04  | 0.53        | TIFHLNPSGR                                          | LYK   | rep2      |
| 571.6031  | 1141.1905 | 1141.2845 | 82.42            | 2      | 1.96  | 0.91        | TIFHLNPSGR                                          | LYT   | rep3      |
| 736.0699  | 1470.1241 | 1470.7601 | 432.47           | 2      | 2.1   | 0.89        | TNMVMV FGEITTK                                      | LYT   | rep2      |
| 793.6173  | 2377.8285 | 2378.5613 | 308.09           | 3      | 4.17  | 2.52        | VHTVLISTQHDETVTNDEIAR                               | LYT   | rep1      |
| 793.7158  | 2378.124  | 2378.5613 | 183.84           | 3      | 3.92  | 2.24        | VHTVLISTQHDETVTNDEIAR                               | LYK   | rep2      |
| 807.3811  | 2419.1198 | 2417.6855 | 593.25           | 3      | 4.21  | 2.1         | VLVNIEQQSPDIAQGVHGHFTK                              | LYK   | rep3      |
| 1209.4173 | 2416.8189 | 2417.6855 | 358.46           | 2      | 4.04  | 2.52        | VLVNIEQQSPDIAQGVHGHFTK                              | LYT   | rep3      |

**Matching Genes:**

[NP\\_171751.1](#) (SAM1 (S-adenosylmethionine synthetase 1); methionine adenosyltransferase [Arabidopsis thaliana])

**Protein Group 23**

**Expression Quality:**

| Group                 | Group Probability | Num Peptides | % Seq Coverage | Num Spectra |
|-----------------------|-------------------|--------------|----------------|-------------|
| Total (Non-Redundant) | 1                 | 11           | 36.83          | 25.0        |

**Peptides:**

| Observed  | Mr(expt)  | Mr(calc)  | Mass Error (ppm) | Charge | Score | Score Delta | Peptide                                 | Group | Replicate |
|-----------|-----------|-----------|------------------|--------|-------|-------------|-----------------------------------------|-------|-----------|
| 369.6198  | 1105.8358 | 1105.249  | 530.89           | 3      | 1.59  | 0.5         | ADVYKPSLGR                              | LYT   | rep1      |
| 479.1128  | 956.2099  | 956.0984  | 116.55           | 2      | 2.14  | 0.15        | FEWISFK                                 | LYT   | rep1      |
| 1071.263  | 2140.5103 | 2141.4377 | 433.09           | 2      | 3.66  | 2.03        | GQLVVIPQGFAYVVQSHGNK                    | LYT   | rep1      |
| 668.9903  | 1335.9649 | 1336.499  | 399.65           | 2      | 3.26  | 1.75        | ISYVVQGTGISGR                           | LYT   | rep1      |
| 538.7234  | 1613.1467 | 1613.6948 | 339.67           | 3      | 1.26  | 0.35        | QPYESEEWHRPR                            | LYT   | rep1      |
| 1491.1305 | 4470.368  | 4470.9287 | 125.41           | 3      | 6.24  | 4           | RGDVFANTPGSAHWIYNSGEQPLVIIALLDIANYQNLDR | LYT   | rep1      |
| 1040.6673 | 2079.3189 | 2080.1853 | 416.5            | 2      | 3.39  | 1.84        | SEAGQIEYWDHNHPQLR                       | LYT   | rep1      |
| 830.4138  | 2488.218  | 2487.6096 | 244.56           | 3      | 5.63  | 3.45        | VFHLAGNNQQGGFGGSQQQQEQK                 | LYT   | rep1      |
| 927.8002  | 1853.5848 | 1854.1161 | 286.56           | 2      | 1.88  | 0.78        | VTSVNSYTLPILEYVR                        | LYT   | rep1      |
| 981.1286  | 1960.2415 | 1961.1475 | 461.98           | 2      | 3.59  | 2.12        | YNMNEANEILYCTGGQGR : +57.05000 (C11)    | LYT   | rep1      |
| 1031.1187 | 2060.2217 | 2060.3567 | 65.5             | 2      | 4.31  | 1.27        | YVIEQGGLYLPTFFTSFK                      | LYT   | rep1      |

**Matching Genes:**



[NP\\_194581.1](#) (CRU3 (CRUCIFERIN 3); nutrient reservoir [*Arabidopsis thaliana*])

**Protein Group 24**

**Expression Quality:**

| Group                 | Group Probability | Num Peptides | % Seq Coverage | Num Spectra |
|-----------------------|-------------------|--------------|----------------|-------------|
| Total (Non-Redundant) | 1                 | 9            | 41.61          | 47.0        |

**Peptides:**

| Observed  | Mr(expt)  | Mr(calc)  | Mass Error (ppm) | Charge | Score | Score Delta | Peptide                                                                 | Group | Replicate |
|-----------|-----------|-----------|------------------|--------|-------|-------------|-------------------------------------------------------------------------|-------|-----------|
| 1382.2958 | 4143.8639 | 4143.5284 | 80.96            | 3      | 6.13  | 4.19        | ALEAFHCDPAAWGVNVQPYSGSPANFAAYTALLQPHDR : +57.05000 (C7)                 | LYK   | rep3      |
| 1382.3173 | 4143.9283 | 4143.5284 | 96.52            | 3      | 5.81  | 4.16        | ALEAFHCDPAAWGVNVQPYSGSPANFAAYTALLQPHDR : +57.05000 (C7)                 | LYT   | rep3      |
| 1374.6168 | 4120.827  | 4120.5991 | 55.33            | 3      | 2.43  | 0.75        | GQPEGAVYDFEDKINFAVFPALQGGPHNHQIGALAVALK                                 | LYT   | rep3      |
| 1003.7291 | 3008.1639 | 3009.3879 | 406.74           | 3      | 4.74  | 2.33        | GYQIVTNGTENHLVLWDLRPLGLTGNK                                             | LYK   | rep3      |
| 1004.0861 | 3009.2347 | 3009.3879 | 50.92            | 3      | 3.14  | 1.06        | GYQIVTNGTENHLVLWDLRPLGLTGNK                                             | LYT   | rep3      |
| 1131.0547 | 2260.0938 | 2261.5227 | 631.83           | 2      | 4.57  | 2.79        | IMGLDLPSGGHLTHGYTSGGK                                                   | LYK   | rep3      |
| 1195.104  | 2388.1924 | 2389.6955 | 629              | 2      | 3.82  | 1.68        | IMGLDLPSGGHLTHGYTSGGK                                                   | LYK   | rep3      |
| 1195.2698 | 2388.524  | 2389.6955 | 490.26           | 2      | 2.86  | 1.38        | IMGLDLPSGGHLTHGYTSGGK                                                   | LYT   | rep2      |
| 1342.7239 | 2683.4322 | 2684.1142 | 254.12           | 2      | 3.37  | 1.65        | INFAVFPALQGGPHNHQIGALAVALK                                              | LYK   | rep2      |
| 1342.9427 | 2683.8697 | 2684.1142 | 91.12            | 2      | 2.87  | 1.08        | INFAVFPALQGGPHNHQIGALAVALK                                              | LYT   | rep3      |
| 1335.4991 | 4003.474  | 4004.5391 | 265.99           | 3      | 5.58  | 2.97        | VGALLLCDMAHISGLVAAQEAAANPFHEYCDVVTTHK : +57.05000 (C7); +57.05000 (C28) | LYT   | rep1      |
| 1335.6337 | 4003.8775 | 4004.5391 | 165.22           | 3      | 5.17  | 3.05        | VGALLLCDMAHISGLVAAQEAAANPFHEYCDVVTTHK : +57.05000 (C7); +57.05000 (C28) | LYK   | rep2      |

|          |           |           |        |   |      |      |                                    |     |      |
|----------|-----------|-----------|--------|---|------|------|------------------------------------|-----|------|
| 646.0892 | 1935.2442 | 1935.0997 | 74.68  | 3 | 1.99 | 0.55 | VNFTTGYIDYD KLEEK                  | LYK | rep1 |
| 996.7157 | 1991.4158 | 1992.1333 | 360.17 | 2 | 2.48 | 0.93 | YYGGNEFIDEIENLCR : +57.05000 (C15) | LYT | rep2 |

**Matching Genes:**

[NP\\_193129.1](#) (SHM4 (SERINE HYDROXYMETHYLTRANSFERASE 4); glycine hydroxymethyltransferase [Arabidopsis thaliana])

**Protein Group 25**

**Expression Quality:**

| Group                 | Group Probability | Num Peptides | % Seq Coverage | Num Spectra |
|-----------------------|-------------------|--------------|----------------|-------------|
| Total (Non-Redundant) | 1                 | 10           | 48.84          | 67.0        |

**Peptides:**

| Observed  | Mr(expt)  | Mr(calc)  | Mass Error (ppm) | Charge | Score | Score Delta | Peptide                      | Group | Replicate |
|-----------|-----------|-----------|------------------|--------|-------|-------------|------------------------------|-------|-----------|
| 934.3297  | 2799.9657 | 2801.1252 | 413.97           | 3      | 5.27  | 2.7         | GEHKQPAYLALQPFGTVPVAVVDGDYK  | LYK   | rep3      |
| 934.4188  | 2800.233  | 2801.1252 | 318.53           | 3      | 3.48  | 1.22        | GEHKQPAYLALQPFGTVPVAVVDGDYK  | LYT   | rep2      |
| 730.125   | 1458.2344 | 1458.5397 | 209.28           | 2      | 3.5   | 1.75        | HVSAWWDDISSR                 | LYT   | rep3      |
| 730.1294  | 1458.2432 | 1458.5397 | 203.26           | 2      | 3.37  | 2           | HVSAWWDDISSR                 | LYK   | rep2      |
| 971.6397  | 1941.2637 | 1941.1173 | 75.43            | 2      | 4.5   | 2.71        | HVSAWWDDISSRPAWK             | LYK   | rep2      |
| 971.2998  | 1940.584  | 1941.1173 | 274.73           | 2      | 4.32  | 2.89        | HVSAWWDDISSRPAWK             | LYT   | rep1      |
| 794.19    | 1586.3643 | 1586.7125 | 219.46           | 2      | 3.8   | 1.81        | KHSAWWDDISSR                 | LYK   | rep1      |
| 793.9278  | 1585.8399 | 1586.7125 | 549.96           | 2      | 3.61  | 1.64        | KHSAWWDDISSR                 | LYT   | rep3      |
| 506.0856  | 1515.2332 | 1514.7276 | 333.78           | 3      | 3.16  | 1.04        | LAGVLDVYEAHLSK               | LYT   | rep1      |
| 506.2029  | 1515.5853 | 1514.7276 | 566.24           | 3      | 3.09  | 0.83        | LAGVLDVYEAHLSK               | LYK   | rep2      |
| 522.0811  | 1042.1465 | 1042.2775 | 125.62           | 2      | 2.39  | 0.38        | RALVTLIEK                    | LYT   | rep2      |
| 522.1006  | 1042.1856 | 1042.2775 | 88.14            | 2      | 2.03  | 0.21        | RALVTLIEK                    | LYK   | rep2      |
| 1037.0236 | 3108.0472 | 3108.5547 | 163.25           | 3      | 5.13  | 2.99        | SKYLAGDFVSLADLAHLPTDYLVGPIGK | LYT   | rep2      |
| 552.6543  | 1103.293  | 1102.2468 | 949.14           | 2      | 1.87  | 0.57        | VYGPHFASPK                   | LYK   | rep1      |
| 551.7752  | 1101.5347 | 1102.2468 | 646.05           | 2      | 1.73  | 0.41        | VYGPHFASPK                   | LYT   | rep1      |

|           |           |           |        |   |      |      |                             |     |      |
|-----------|-----------|-----------|--------|---|------|------|-----------------------------|-----|------|
| 629.938   | 1257.8604 | 1258.4331 | 455.09 | 2 | 2.2  | 0.62 | VYGPHFASPKR                 | LYK | rep1 |
| 630.0066  | 1257.9976 | 1258.4331 | 346.06 | 2 | 2.18 | 0.57 | VYGPHFASPKR                 | LYT | rep2 |
| 965.9805  | 2894.9179 | 2893.3042 | 557.75 | 3 | 3.12 | 1.39 | YLAGDFVSLADLAHLPFTDYLVGPIGK | LYK | rep3 |
| 1447.0784 | 2892.1411 | 2893.3042 | 401.98 | 2 | 1.42 | 0.5  | YLAGDFVSLADLAHLPFTDYLVGPIGK | LYT | rep3 |

**Matching Genes:**

[NP\\_180643.1](#) (ATGSTF9 (Arabidopsis thaliana Glutathione S-transferase (class phi) 9); glutathione transferase)

**Protein Group 26**

**Expression Quality:**

| Group                 | Group Probability | Num Peptides | % Seq Coverage | Num Spectra |
|-----------------------|-------------------|--------------|----------------|-------------|
| Total (Non-Redundant) | 1                 | 9            | 34.48          | 80.0        |

**Peptides:**

| Observed  | Mr(expt)  | Mr(calc)   | Mass Error (ppm) | Charge | Score | Score Delta | Peptide                                          | Group | Replicate |
|-----------|-----------|------------|------------------|--------|-------|-------------|--------------------------------------------------|-------|-----------|
| 771.7852  | 1541.5547 | 1541.67    | 74.79            | 2      | 2.91  | 1.51        | AEYDEAGPGIVHRK                                   | LYT   | rep3      |
| 771.7912  | 1541.5667 | 1541.67    | 67.04            | 2      | 2.86  | 1.18        | AEYDEAGPGIVHRK                                   | LYK   | rep1      |
| 1053.3295 | 3156.9649 | 3157.6082  | 203.73           | 3      | 1.72  | 0.3         | CPEVLFQPSFVGMEAAAGIHETTYNSIMK : +57.05000 (C1)   | LYT   | rep3      |
| 1154.3876 | 3460.1392 | 3460.9693  | 239.83           | 3      | 4.91  | 1.01        | FRCPEVLFQPSFVGMEAAAGIHETTYNSIMK : +57.05000 (C3) | LYT   | rep2      |
| 1154.1586 | 3459.4522 | 3460.9693  | 438.33           | 3      | 2.73  | 0.69        | FRCPEVLFQPSFVGMEAAAGIHETTYNSIMK : +57.05000 (C3) | LYK   | rep1      |
| 619.6364  | 1237.2571 | 1237.4608  | 164.6            | 2      | 2.45  | 0.47        | HHGVMVGMNQK                                      | LYK   | rep3      |
| 413.6602  | 1237.9572 | 1237.4608  | 401.12           | 3      | 2.15  | 0.13        | HHGVMVGMNQK                                      | LYT   | rep2      |
| 657.1161  | 1968.3248 | 1968.2623  | 31.74            | 3      | 2.34  | 0.72        | IAPEEHPVLLTE APLNPK                              | LYT   | rep3      |
| 506.2698  | 1515.7858 | 1515.6791  | 70.45            | 3      | 3.9   | 1.8         | IWHHTFYNELR                                      | LYK   | rep3      |
| 758.6241  | 1515.2325 | 1515.6791  | 294.66           | 2      | 3.14  | 1.22        | IWHHTFYNELR                                      | LYT   | rep1      |
| 1051.3451 | 3151.0118 | 3152.5259  | 480.27           | 3      | 5.31  | 0.39        | TTGIVLDSGDGVSHTVPIYEGFSLPHAILR                   | LYT   | rep2      |
| 1051.6451 | 3151.9119 | 315 2.5259 | 194.74           | 3      | 5     | 0.25        | TTGIVLDSGDGVSHTVPIYEGFSLPHAILR                   | LYK   | rep1      |
| 960.0453  | 1918.075  | 1919.0838  | 525.7            | 2      | 4.12  | 2.36        | YPIEHGVVSNWDDMEK                                 | LYT   | rep1      |

|           |           |           |        |   |      |      |                              |     |      |
|-----------|-----------|-----------|--------|---|------|------|------------------------------|-----|------|
| 1139.9122 | 3416.7132 | 3416.7483 | 10.26  | 3 | 5.07 | 2.85 | YPIEHGVVSNWDDMEKIWHHTFYNELR  | LYT | rep2 |
| 1140.1549 | 3417.4412 | 3416.7483 | 202.81 | 3 | 5.03 | 2.94 | YPIEHGVVSNWDD MEKIWHHTFYNELR | LYK | rep1 |

**Matching Genes:**

[NP\\_175350.1](#) (ACT8 (ACTIN 8); structural constituent of cytoskeleton [Arabidopsis thaliana])

**Protein Group 27**

**Expression Quality:**

| Group                 | Group Probability | Num Peptides | % Seq Coverage | Num Spectra |
|-----------------------|-------------------|--------------|----------------|-------------|
| Total (Non-Redundant) | 1                 | 10           | 37.34          | 45.0        |

**Peptides:**

| Observed  | Mr(expt)  | Mr(calc)  | Mass Error (ppm) | Charge | Score | Score Delta | Peptide                                | Group | Replicate |
|-----------|-----------|-----------|------------------|--------|-------|-------------|----------------------------------------|-------|-----------|
| 726.7167  | 2177.1265 | 2176.3915 | 337.74           | 3      | 4.58  | 2.05        | CAHHNNHHEGFMNFMHR : +57.05000 (C1)     | LYK   | rep3      |
| 726.1698  | 2175.4859 | 2176.3915 | 416.09           | 3      | 2.81  | 1.49        | CAHHNNHHEGFMNFMHR : +57.05000 (C1)     | LYT   | rep2      |
| 630.4407  | 1258.8658 | 1259.483  | 490.05           | 2      | 2.17  | 0.44        | FHWKPTCGVK : +57.05000 (C7)            | LYK   | rep2      |
| 631.0579  | 1260.1001 | 1259.483  | 490.01           | 2      | 2.12  | 0.22        | FHWKPTCGVK : +57.05000 (C7)            | LYT   | rep3      |
| 1122.1092 | 2242.2027 | 2242.4746 | 121.27           | 2      | 2.02  | 0.78        | GFFEVTHTDISNLTCADFLR : +57.05000 (C14) | LYT   | rep3      |
| 509.9577  | 1526.8496 | 1525.7505 | 720.4            | 3      | 3.32  | 1.63        | GPILLEDYHLVEK                          | LYT   | rep1      |
| 548.1882  | 1641.5412 | 1641.8515 | 188.97           | 3      | 2.59  | 0.97        | HAEKYPTPPAVCSGK : +57.05000 (C12)      | LYK   | rep2      |
| 548.1862  | 1641.535  | 1641.8515 | 192.76           | 3      | 1.77  | 0.12        | HAEKYPTPPAVCSGK : +57.05000 (C12)      | LYT   | rep3      |
| 606.9702  | 1817.8872 | 1817.1072 | 429.26           | 3      | 3.32  | 1.02        | HRLGPNYLQLPVNAPK                       | LYT   | rep1      |
| 606.5256  | 1816.5534 | 1817.1072 | 304.74           | 3      | 1.52  | 0.2         | HRLGPNYLQLPVNAPK                       | LYK   | rep1      |
| 1173.0807 | 3516.2186 | 3515.9165 | 85.92            | 3      | 3.06  | 1.2         | ILDFFSHHPESLNMFTFLFDDIGIPQDYR          | LYT   | rep2      |
| 1173.2762 | 3516.8053 | 3515.9165 | 252.78           | 3      | 1.36  | 0.15        | ILDFFSHHPESLNMFTFLFDDIGIPQDYR          | LYK   | rep2      |
| 763.5303  | 1525.045  | 1523.7809 | 829.57           | 2      | 2.52  | 0.87        | LGPNYLQLPVNAPK                         | LYT   | rep3      |
| 762.8079  | 1523.6001 | 1523.7809 | 118.61           | 2      | 1.77  | 0.42        | LGPNYLQLPVNAPK                         | LYK   | rep2      |
| 945.1427  | 2832.4046 | 2831.97   | 153.49           | 3      | 2.98  | 1.42        | VGGTNHSHATQDLYDSIAAGNYPEWK             | LYT   | rep3      |

|           |           |           |        |   |      |      |                                  |     |      |
|-----------|-----------|-----------|--------|---|------|------|----------------------------------|-----|------|
| 1170.3031 | 3507.8858 | 3507.7729 | 32.18  | 3 | 4.26 | 1.91 | YRPASSYNSPFFTTNSGAPVWNNNSSMTVGPR | LYT | rep1 |
| 1169.8199 | 3506.4364 | 3507.7729 | 381.03 | 3 | 3.56 | 1.45 | YRPASSYNSPFFTTNSGAPVWNNNSSMTVGPR | LYK | rep2 |

**Matching Genes:**

[NP\\_001031791.1](#) (CAT2 (CATALASE 2); catalase [Arabidopsis thaliana])

**Protein Group 28**

**Expression Quality:**

| Group                 | Group Probability | Num Peptides | % Seq Coverage | Num Spectra |
|-----------------------|-------------------|--------------|----------------|-------------|
| Total (Non-Redundant) | 1                 | 9            | 32.63          | 75.0        |

**Peptides:**

| Observed  | Mr(expt)  | Mr(calc)  | Mass Error (ppm) | Charge | Score | Score Delta | Peptide                                         | Group | Replicate |
|-----------|-----------|-----------|------------------|--------|-------|-------------|-------------------------------------------------|-------|-----------|
| 600.2312  | 1198.4468 | 1198.4224 | 20.41            | 2      | 1.86  | 0.47        | AVFPSIVGRPR                                     | LYT   | rep1      |
| 600.2521  | 1198.4886 | 1198.4224 | 55.25            | 2      | 1.82  | 0.76        | AVFPSIVGRPR                                     | LYK   | rep1      |
| 1055.9095 | 3164.7052 | 3163.6559 | 331.66           | 3      | 5.7   | 3.09        | CPEVLFQPSLIGMEAPGIHETTYNSIMK : +57.05000 (C1)   | LYT   | rep3      |
| 1055.0746 | 3162.2003 | 3163.6559 | 460.11           | 3      | 5.59  | 3.14        | CPEVLFQPSLIGMEAPGIHETTYNSIMK : +57.05000 (C1)   | LYK   | rep2      |
| 1156.392  | 3466.1524 | 3467.017  | 249.36           | 3      | 4.44  | 1.79        | FRCPEVLFQPSLIGMEAPGIHETTYNSIMK : +57.05000 (C3) | LYT   | rep2      |
| 573.1067  | 1144.1978 | 1144.3736 | 153.67           | 2      | 1.96  | 0.47        | HTGVMVGMGQK                                     | LYT   | rep1      |
| 506.2698  | 1515.7858 | 1515.6791 | 70.45            | 3      | 3.9   | 1.8         | IWHHTFYNELR                                     | LYK   | rep3      |
| 758.6241  | 1515.2325 | 1515.6791 | 294.66           | 2      | 3.14  | 1.22        | IWHHTFYNELR                                     | LYT   | rep1      |
| 738.7589  | 1475.5022 | 1475.5221 | 13.45            | 2      | 2.26  | 0.76        | SEYDESGPSIVHR                                   | LYT   | rep3      |
| 802.683   | 1603.3504 | 1603.6951 | 214.93           | 2      | 2.13  | 0.91        | SEYDESGPSIVHRK                                  | LYK   | rep2      |
| 1051.7975 | 3152.369  | 3152.5259 | 49.77            | 3      | 5.25  | 0.18        | TTGIVLDSGDGVSHTVPIYEGYALPHAILR                  | LYK   | rep1      |
| 1051.5966 | 3151.7662 | 3152.5259 | 240.97           | 3      | 4.92  | 0.04        | TTGIVLDSGDGVSHTVPIYEGYALPHAILR                  | LYT   | rep2      |
| 967.0988  | 1932.1819 | 1933.1106 | 480.4            | 2      | 2.68  | 0.77        | YPIEHGIVSNWDDMEK                                | LYT   | rep1      |

**Matching Genes:**

[NP\\_196543.1](#) (ACT7 (actin 7) [Arabidopsis thaliana])

### Protein Group 29

#### Expression Quality:

| Group                 | Group Probability | Num Peptides | % Seq Coverage | Num Spectra |
|-----------------------|-------------------|--------------|----------------|-------------|
| Total (Non-Redundant) | 1                 | 10           | 19.57          | 49.0        |

#### Peptides:

| Observed  | Mr(expt)  | Mr(calc)  | Mass Error (ppm) | Charge | Score | Score Delta | Peptide                                | Group | Replicate |
|-----------|-----------|-----------|------------------|--------|-------|-------------|----------------------------------------|-------|-----------|
| 1058.343  | 2114.6704 | 2116.4087 | 821.31           | 2      | 4.77  | 2.6         | GHVFEEMQRPGTPLYNIK                     | LYK   | rep3      |
| 1058.6516 | 2115.2876 | 2116.4087 | 529.69           | 2      | 4.18  | 2.57        | GHVFEEMQRPGTPLYNIK                     | LYT   | rep2      |
| 781.0096  | 2340.0055 | 2339.6116 | 168.36           | 3      | 1.83  | 0.76        | GVQYLNEIKDSVVAGFQWASK                  | LYK   | rep1      |
| 595.5259  | 1189.0362 | 1189.3926 | 299.65           | 2      | 1.87  | 0.21        | IMDYKHNIR                              | LYT   | rep1      |
| 520.454   | 1038.8924 | 1039.2768 | 369.94           | 2      | 2.69  | 0.54        | IRPVLTVNK                              | LYT   | rep2      |
| 520.8167  | 1039.6177 | 1039.2768 | 327.99           | 2      | 2.39  | 0.71        | IRPVLTVNK                              | LYK   | rep2      |
| 761.2166  | 2280.6262 | 2281.6823 | 462.88           | 3      | 4.55  | 2.39        | KIWAFGPETTGPNMVVDMCK : +57.05000 (C19) | LYT   | rep1      |
| 761.1459  | 2280.4141 | 2281.6823 | 555.81           | 3      | 1.43  | 0.07        | KIWAFGPETTGPNMVVDMCK : +57.05000 (C19) | LYK   | rep1      |
| 1030.37   | 3088.0865 | 3088.5901 | 163.04           | 3      | 2.16  | 0.74        | LLEPVYMVEIQAPEGALGGIYSVLNQKR           | LYT   | rep1      |
| 904.6308  | 1807.2459 | 1807.9659 | 398.26           | 2      | 3.85  | 2.25        | NATLTNEKEVDAHPIR                       | LYT   | rep2      |
| 603.9844  | 1808.9296 | 1807.9659 | 533.04           | 3      | 3.44  | 1.86        | NATLTNEKEVDAHPIR                       | LYK   | rep1      |
| 654.5242  | 1307.0327 | 1307.4844 | 345.41           | 2      | 2.39  | 0.9         | NMSVIAHVVDHGK                          | LYK   | rep1      |
| 772.5315  | 1543.0474 | 1543.7926 | 482.74           | 2      | 2.64  | 0.99        | RGFVQFCYEPIK : +57.05000 (C7)          | LYK   | rep1      |
| 772.6875  | 1543.3594 | 1543.7926 | 280.63           | 2      | 1.68  | 0.3         | RGFVQFCYEPIK : +57.05000 (C7)          | LYT   | rep1      |

|           |           |           |        |   |      |      |                      |     |      |
|-----------|-----------|-----------|--------|---|------|------|----------------------|-----|------|
| 1200.6326 | 2399.2495 | 2399.5806 | 137.94 | 2 | 3.26 | 1.64 | YRVENLYEGLPDDQYANAIR | LYT | rep2 |
| 1200.5608 | 2399.106  | 2399.5806 | 197.77 | 2 | 2.67 | 1.27 | YRVENLYEGLPDDQYANAIR | LYK | rep1 |

**Matching Genes:**

[NP\\_849818.1](#) (LOS1 (Low expression of osmotically responsive genes 1); translation elongation factor/ translation factor, nucleic acid binding [Arabidopsis thaliana])

**Protein Group 30**

**Expression Quality:**

| Group                 | Group Probability | Num Peptides | % Seq Coverage | Num Spectra |
|-----------------------|-------------------|--------------|----------------|-------------|
| Total (Non-Redundant) | 1                 | 9            | 18.83          | 54.0        |

**Peptides:**

| Observed | Mr(expt)  | Mr(calc)  | Mass Error (ppm) | Charge | Score | Score Delta | Peptide                             | Group | Replicate |
|----------|-----------|-----------|------------------|--------|-------|-------------|-------------------------------------|-------|-----------|
| 508.9644 | 1523.8696 | 1523.6548 | 140.99           | 3      | 3.9   | 0.24        | ARFEELNNDLFR                        | LYT   | rep3      |
| 763.6714 | 1525.3272 | 1523.6548 | 1097.63          | 2      | 1.45  | 0.33        | ARFEELNNDLFR                        | LYK   | rep2      |
| 602.045  | 1202.0743 | 1202.2799 | 171.04           | 2      | 2.97  | 0.47        | GRLSQEEIDR                          | LYK   | rep3      |
| 601.8449 | 1201.6741 | 1202.2799 | 503.87           | 2      | 2.43  | 0.35        | GRLSQEEIDR                          | LYT   | rep1      |
| 887.6296 | 2659.8654 | 2661.7966 | 725.52           | 3      | 2.14  | 0.41        | GVNPDEAVAYGAAVQGGILSGEGGDETK        | LYT   | rep1      |
| 830.6215 | 1659.2273 | 1659.8848 | 396.07           | 2      | 3.39  | 1.6         | IINEPTAAAIAYGLDK                    | LYT   | rep1      |
| 894.5905 | 1787.1653 | 1788.0577 | 499.09           | 2      | 3.68  | 2.05        | IINEPTAAAIAYGLDKK                   | LYT   | rep1      |
| 894.6775 | 1787.3394 | 1788.0577 | 401.74           | 2      | 3.09  | 1.74        | IINEPTAAAIAYGLDKK                   | LYK   | rep1      |
| 636.6647 | 1906.9705 | 1907.1391 | 88.41            | 3      | 2.99  | 1.15        | IKDAVVTVPAYFNDAQR                   | LYK   | rep2      |
| 636.6281 | 1906.8607 | 1907.1391 | 146.01           | 3      | 1.93  | 0.61        | IKDAVVTVPAYFNDAQR                   | LYT   | rep1      |
| 602.3731 | 1202.7305 | 1201.4629 | 1055.07          | 2      | 2.14  | 0.48        | KLVPYQIVNK                          | LYT   | rep3      |
| 601.4549 | 1200.8941 | 1201.4629 | 473.42           | 2      | 1.83  | 0.48        | KLVPYQIVNK                          | LYK   | rep2      |
| 1052.295 | 2102.5743 | 2103.4498 | 416.23           | 2      | 4.44  | 2.86        | LKEVEAVCNPIITAVYQR : +57.05000 (C8) | LYT   | rep1      |
| 702.0964 | 2103.2658 | 2103.4498 | 87.44            | 3      | 2.67  | 1.03        | LKEVEAVCNPIITAVYQR : +57.05000 (C8) | LYK   | rep2      |

|          |           |           |        |   |      |      |               |     |      |
|----------|-----------|-----------|--------|---|------|------|---------------|-----|------|
| 768.9619 | 1535.9082 | 1536.6119 | 457.95 | 2 | 3.68 | 1.5  | NGHVEIANDQGNR | LYK | rep2 |
| 768.8575 | 1535.6993 | 1536.6119 | 593.95 | 2 | 3.52 | 1.76 | NGHVEIANDQGNR | LYT | rep1 |

**Matching Genes:**

[NP\\_198206.1](#) (luminal binding protein 1 (BiP-1) (BP1) [Arabidopsis thaliana])

**Protein Group 31**

**Expression Quality:**

| Group                 | Group Probability | Num Peptides | % Seq Coverage | Num Spectra |
|-----------------------|-------------------|--------------|----------------|-------------|
| Total (Non-Redundant) | 1                 | 9            | 18.64          | 74.0        |

**Peptides:**

| Observed  | Mr(expt)  | Mr(calc)  | Mass Error (ppm) | Charge | Score | Score Delta | Peptide                                       | Group | Replicate |
|-----------|-----------|-----------|------------------|--------|-------|-------------|-----------------------------------------------|-------|-----------|
| 762.5843  | 1523.1529 | 1522.7098 | 290.96           | 2      | 3.56  | 0.06        | ARFEELNIDLFR                                  | LYK   | rep1      |
| 762.5401  | 1523.0645 | 1522.7098 | 232.91           | 2      | 3.17  | 0.01        | ARFEELNIDLFR                                  | LYT   | rep3      |
| 838.6761  | 1675.3365 | 1675.6749 | 201.98           | 2      | 3.11  | 1.34        | ATAGDTHLGGEDFDNR                              | LYT   | rep1      |
| 838.4655  | 1674.9153 | 1675.6749 | 453.31           | 2      | 3.09  | 1.66        | ATAGDTHLGGEDFDNR                              | LYK   | rep1      |
| 863.955   | 2588.8414 | 2588.8157 | 9.92             | 3      | 2.19  | 0.53        | GEGPAIGIDLGTYSVGVWQHDR : +57.05000 (C16)      | LYT   | rep1      |
| 863.8718  | 2588.592  | 2588.8157 | 86.41            | 3      | 1.7   | 0.5         | GEGPAIGIDLGTYSVGVWQHDR : +57.05000 (C16)      | LYK   | rep2      |
| 830.6215  | 1659.2273 | 1659.8848 | 396.07           | 2      | 3.39  | 1.6         | IINEPTAAAIAYGLDK                              | LYT   | rep1      |
| 894.5905  | 1787.1653 | 1788.0577 | 499.09           | 2      | 3.68  | 2.05        | IINEPTAAAIAYGLDKK                             | LYT   | rep1      |
| 894.6775  | 1787.3394 | 1788.0577 | 401.74           | 2      | 3.09  | 1.74        | IINEPTAAAIAYGLDKK                             | LYK   | rep1      |
| 1066.5057 | 3196.4937 | 3196.42   | 23.08            | 3      | 3.61  | 1.43        | KIEDSIEAAIEWLEANQLAECDEFEDK : +57.05000 (C21) | LYK   | rep3      |
| 550.451   | 1648.3297 | 1645.9881 | 1422.58          | 3      | 3.63  | 1.8         | MKELESICNPIIAK : +57.05000 (C8)               | LYT   | rep3      |
| 639.9811  | 1277.9466 | 1278.4846 | 420.84           | 2      | 3.06  | 1.48        | MVNHFVQEFK                                    | LYK   | rep3      |
| 640.4624  | 1278.9092 | 1278.4846 | 332.12           | 2      | 2.97  | 1.31        | MVNHFVQEFK                                    | LYT   | rep2      |
| 717.9392  | 1433.8628 | 1434.671  | 563.32           | 2      | 3.01  | 1.05        | MVNHFVQEFKR                                   | LYK   | rep1      |



|          |           |          |        |   |      |      |             |     |      |
|----------|-----------|----------|--------|---|------|------|-------------|-----|------|
| 717.9734 | 1433.9312 | 1434.671 | 515.67 | 2 | 2.68 | 1.24 | MVNHFVQEFKR | LYT | rep3 |
|----------|-----------|----------|--------|---|------|------|-------------|-----|------|

**Matching Genes:**

[NP\\_187555.1](#) (heat shock cognate 70 kDa protein 3 (HSC70-3) (HSP70-3) [Arabidopsis thaliana])

**Protein Group 32**

**Expression Quality:**

| Group                 | Group Probability | Num Peptides | % Seq Coverage | Num Spectra |
|-----------------------|-------------------|--------------|----------------|-------------|
| Total (Non-Redundant) | 1                 | 7            | 34.64          | 34.0        |

**Peptides:**

| Observed  | Mr(expt)  | Mr(calc)  | Mass Error (ppm) | Charge | Score | Score Delta | Peptide                                | Group | Replicate |
|-----------|-----------|-----------|------------------|--------|-------|-------------|----------------------------------------|-------|-----------|
| 636.0758  | 1905.2039 | 1904.2002 | 527.13           | 3      | 5.02  | 2.65        | HVLVILTDMSSYADALR                      | LYT   | rep3      |
| 1152.7831 | 3455.3258 | 3455.7959 | 136.04           | 3      | 6.39  | 3.55        | IFNGSGKPIDNGPPILPEAYLDISGSSINPSE       | LYK   | rep3      |
| 1152.4882 | 3454.441  | 3455.7959 | 392.06           | 3      | 5.82  | 3.26        | IFNGSGKPIDNGPPILPEAYLDISGSSINPSE       | LYT   | rep3      |
| 727.434   | 2179.2784 | 2178.5216 | 347.41           | 3      | 5.19  | 3.28        | IPLFSAAGLPHNEIAAQICR : +57.05000 (C19) | LYT   | rep1      |
| 727.464   | 2179.3685 | 2178.5216 | 388.76           | 3      | 5.19  | 3.29        | IPLFSAAGLPHNEIAAQICR : +57.05000 (C19) | LYK   | rep3      |
| 675.1935  | 2022.557  | 2023.1719 | 303.93           | 3      | 2.56  | 0.67        | KDHSVSNQLYANYAIGK                      | LYT   | rep3      |
| 1377.0018 | 4127.982  | 4128.6333 | 157.75           | 3      | 4.7   | 2.82        | KGSITQIPILTMPNDDITHPTPDLTGYITEGQIYIDR  | LYT   | rep1      |
| 1376.8944 | 4127.6598 | 4128.6333 | 235.8            | 3      | 3.66  | 1.95        | KGSITQIPILTMPNDDITHPTPDLTGYITEGQIYIDR  | LYK   | rep1      |
| 615.5054  | 1228.9952 | 1229.3452 | 284.75           | 2      | 2.61  | 0.71        | RGQVLEVDGEK                            | LYK   | rep1      |
| 615.5827  | 1229.1497 | 1229.3452 | 159.0            | 2      | 2.44  | 0.76        | RGQVLEVDGEK                            | LYT   | rep2      |
| 1206.4017 | 3616.1817 | 3617.9858 | 498.65           | 3      | 2.3   | 0.54        | TENLIQEDHGEDNFAIVFAAMGVNMETAQFFK       | LYK   | rep3      |

**Matching Genes:**

[NP\\_973871.1](#) ((VACUOLAR ATP SYNTHASE SUBUNIT B3); ATP binding / hydrogen ion transporting ATP synthase, rotational mechanism / hydrogen ion transporting ATPase, rotational mechanism / hydrogen-exporting ATPase, phosphorylative mechanism [Arabidopsis thaliana])

### Protein Group 33

#### Expression Quality:

| Group                 | Group Probability | Num Peptides | % Seq Coverage | Num Spectra |
|-----------------------|-------------------|--------------|----------------|-------------|
| Total (Non-Redundant) | 1                 | 10           | 28.54          | 64.0        |

#### Peptides:

| Observed | Mr(expt)  | Mr(calc)  | Mass Error (ppm) | Charge | Score | Score Delta | Peptide                           | Group | Replicate |
|----------|-----------|-----------|------------------|--------|-------|-------------|-----------------------------------|-------|-----------|
| 534.2093 | 1066.4029 | 1066.2558 | 137.88           | 2      | 2.11  | 0.34        | DLALIIHGSK                        | LYK   | rep2      |
| 533.9639 | 1065.9121 | 1066.2558 | 322.35           | 2      | 1.75  | 0.48        | DLALIIHGSK                        | LYT   | rep1      |
| 896.2537 | 1790.4917 | 1789.9874 | 281.75           | 2      | 4.31  | 2.47        | FKDIFQEVYEASWK                    | LYT   | rep2      |
| 597.538  | 1789.5904 | 1789.9874 | 221.79           | 3      | 4.15  | 1.7         | FKDIFQEVYEASWK                    | LYK   | rep1      |
| 497.7909 | 993.5662  | 993.0373  | 532.63           | 2      | 1.87  | 0.93        | HAFGDQYR                          | LYK   | rep1      |
| 497.7672 | 993.5187  | 993.0373  | 484.81           | 2      | 1.6   | 0.71        | HAFGDQYR                          | LYT   | rep3      |
| 626.6272 | 1251.2388 | 1251.4974 | 206.65           | 2      | 2.26  | 0.73        | LIDDMVAYALK                       | LYT   | rep2      |
| 644.7974 | 1287.5791 | 1287.5493 | 23.17            | 2      | 1.83  | 0.62        | LITPFVELDIK                       | LYT   | rep2      |
| 749.2167 | 1496.4178 | 1496.8238 | 271.26           | 2      | 1.76  | 0.71        | LVPGWTKPICIGR : +57.05000 (C10)   | LYK   | rep3      |
| 748.6848 | 1495.354  | 1496.8238 | 981.91           | 2      | 1.45  | 0.49        | LVPGWTKPICIGR : +57.05000 (C10)   | LYT   | rep2      |
| 887.7714 | 1773.5271 | 1774.0993 | 322.52           | 2      | 3.88  | 2           | NILNGTVFREPIICK : +57.05000 (C14) | LYK   | rep1      |
| 888.1635 | 1774.3113 | 1774.0993 | 119.49           | 2      | 3.36  | 1.77        | NILNGTVFREPIICK : +57.05000 (C14) | LYT   | rep2      |
| 799.088  | 1596.1604 | 1595.7195 | 276.34           | 2      | 4.34  | 2.51        | SKYDAAGIWYEHR                     | LYT   | rep3      |
| 799.1072 | 1596.1988 | 1595.7195 | 300.36           | 2      | 3.87  | 1.01        | SKYDAAGIWYEHR                     | LYK   | rep2      |
| 679.2493 | 1356.4829 | 1355.4591 | 755.35           | 2      | 2.88  | 1.68        | TIEAEEAHGTVTR                     | LYK   | rep3      |
| 678.5169 | 1355.0181 | 1355.4591 | 325.35           | 2      | 2.83  | 1.4         | TIEAEEAHGTVTR                     | LYT   | rep2      |
| 559.4082 | 1116.8008 | 1117.2615 | 412.3            | 2      | 2.83  | 0.85        | YFDLGLPHR                         | LYT   | rep3      |

|          |           |           |        |   |      |      |           |     |      |
|----------|-----------|-----------|--------|---|------|------|-----------|-----|------|
| 559.3822 | 1116.7488 | 1117.2615 | 458.84 | 2 | 2.68 | 0.84 | YFDLGLPHR | LYK | rep2 |
|----------|-----------|-----------|--------|---|------|------|-----------|-----|------|

**Matching Genes:**

[NP\\_176768.1](#) (isocitrate dehydrogenase, putative / NADP+ isocitrate dehydrogenase, putative [Arabidopsis thaliana])

**Protein Group 34**

**Expression Quality:**

| Group                 | Group Probability | Num Peptides | % Seq Coverage | Num Spectra |
|-----------------------|-------------------|--------------|----------------|-------------|
| Total (Non-Redundant) | 1                 | 9            | 43.96          | 54.0        |

**Peptides:**

| Observed  | Mr(expt)  | Mr(calc)  | Mass Error (ppm) | Charge | Score | Score Delta | Peptide                                                             | Group | Replicate |
|-----------|-----------|-----------|------------------|--------|-------|-------------|---------------------------------------------------------------------|-------|-----------|
| 964.4705  | 2890.3879 | 2888.1579 | 772.1            | 3      | 3.31  | 1.42        | ALDWGPGGGPDLIVDDGGDATLLIHEGVK                                       | LYK   | rep2      |
| 963.1738  | 2886.498  | 2888.1579 | 574.74           | 3      | 2.56  | 0.97        | ALDWGPGGGPDLIVDDGGDATLLIHEGVK                                       | LYT   | rep2      |
| 565.3562  | 1128.6968 | 1129.359  | 586.34           | 2      | 2.19  | 0.62        | DIIMVDHMR                                                           | LYT   | rep3      |
| 565.7847  | 1129.5537 | 1129.359  | 172.44           | 2      | 1.7   | 0.02        | DIIMVDHMR                                                           | LYK   | rep2      |
| 788.0707  | 2361.1886 | 2361.574  | 163.2            | 3      | 3.11  | 1.28        | DQSDYVSIPIEGPYKPPHYR                                                | LYK   | rep1      |
| 787.9305  | 2360.7681 | 2361.574  | 341.22           | 3      | 2.72  | 0.87        | DQSDYVSIPIEGPYKPPHYR                                                | LYT   | rep2      |
| 513.6719  | 1025.3282 | 1025.1874 | 137.34           | 2      | 1.77  | 0.6         | HSLPDGLMR                                                           | LYT   | rep2      |
| 513.6179  | 1025.2202 | 1025.1874 | 32.08            | 2      | 1.53  | 0.44        | HSLPDGLMR                                                           | LYK   | rep2      |
| 1262.3226 | 3783.9444 | 3784.3387 | 104.18           | 3      | 4.94  | 2.63        | LMNLGCATGHPSFVMSCSFTNQVIAQLELWNEK : +57.05000 (C6); +57.05000 (C17) | LYK   | rep1      |
| 1262.0262 | 3783.0553 | 3784.3387 | 339.14           | 3      | 3.88  | 1.6         | LMNLGCATGHPSFVMSCSFTNQVIAQLELWNEK : +57.05000 (C6);                 | LYT   | rep3      |

|           |           |           |        |   |      |      |                                               |     |      |
|-----------|-----------|-----------|--------|---|------|------|-----------------------------------------------|-----|------|
|           |           |           |        |   |      |      | +57.05000 (C17)                               |     |      |
| 739.3221  | 1476.6285 | 1475.6499 | 663.14 | 2 | 2.41 | 1.14 | LVGVSEETTTGVKR                                | LYT | rep1 |
| 738.6745  | 1475.3333 | 1475.6499 | 214.55 | 2 | 2.27 | 1.01 | LVGVSEETTTGVKR                                | LYK | rep1 |
| 1064.7548 | 3191.2408 | 3190.578  | 207.73 | 3 | 4.92 | 2.99 | NNAIVCNIGHFDNEIDMLGLETYPGVKR : +57.05000 (C6) | LYT | rep2 |
| 1064.6537 | 3190.9376 | 3190.578  | 112.69 | 3 | 4.61 | 3.06 | NNAIVCNIGHFDNEIDMLGLETYPGVKR : +57.05000 (C6) | LYK | rep1 |
| 630.5091  | 1259.0025 | 1259.395  | 311.68 | 2 | 2.96 | 1.16 | SKFDNLYGCR : +57.05000 (C9)                   | LYT | rep1 |
| 630.2233  | 1258.4309 | 1259.395  | 765.5  | 2 | 2.18 | 0.92 | SKFDNLYGCR : +57.05000 (C9)                   | LYK | rep2 |
| 426.0969  | 850.1781  | 850.0636  | 134.68 | 2 | 1.97 | 0.64 | VALLHLGK                                      | LYT | rep2 |
| 426.0254  | 850.0352  | 850.0636  | 33.47  | 2 | 1.67 | 0.33 | VALLHLGK                                      | LYK | rep2 |

**Matching Genes :**

[NP\\_001031627.1](#) (HOG1 (HOMOLOGY-DEPENDENT GENE SILENCING 1); adenosylhomocysteinase [Arabidopsis thaliana])

**Protein Group 35**

**Expression Quality:**

| Group                 | Group Probability | Num Peptides | % Seq Coverage | Num Spectra |
|-----------------------|-------------------|--------------|----------------|-------------|
| Total (Non-Redundant) | 1                 | 7            | 55.44          | 30.0        |

**Peptides:**

| Observed  | Mr(expt)  | Mr(calc)  | Mass Error (ppm) | Charge | Score | Score Delta | Peptide                         | Group | Replicate |
|-----------|-----------|-----------|------------------|--------|-------|-------------|---------------------------------|-------|-----------|
| 773.796   | 2318.3646 | 2318.6238 | 111.78           | 3      | 5.3   | 3.15        | IMEKLPGHHGPTNTGVVHHEK           | LYK   | rep3      |
| 773.557   | 2317.6475 | 2318.6238 | 421.04           | 3      | 2.69  | 0.85        | IMEKLPGHHGPTNTGVVHHEK           | LYT   | rep1      |
| 649.2074  | 1944.5987 | 1945.1539 | 285.43           | 3      | 3.27  | 1.15        | LPGHHGPTNTGVVHHEKK              | LYK   | rep1      |
| 649.2762  | 1944.8053 | 1945.1539 | 179.25           | 3      | 3.26  | 0.86        | LPGHHGPTNTGVVHHEKK              | LYT   | rep3      |
| 965.662   | 2893.9625 | 2895.0356 | 370.69           | 3      | 4.16  | 1.93        | LPGHHGSHQTGTNTAYGTNTNVVHHEK     | LYT   | rep2      |
| 965.6353  | 2893.8823 | 2895.0356 | 398.39           | 3      | 4.13  | 2.26        | LPGHHGSHQTGTNTAYGTNTNVVHHEK     | LYK   | rep1      |
| 1128.0609 | 3381.1593 | 3382.6518 | 441.25           | 3      | 2.96  | 1.07        | VMEKLPGHHGSHQTGTNTAYGTNTNVVHHEK | LYK   | rep3      |
| 727.2654  | 2178.7727 | 2179.385  | 280.97           | 3      | 2.98  | 1.26        | VMEQLPGHHGATGTGGVHHEK           | LYT   | rep1      |

|           |           |           |        |   |      |      |                                  |     |      |
|-----------|-----------|-----------|--------|---|------|------|----------------------------------|-----|------|
| 727.277   | 2178.8075 | 2179.385  | 265    | 3 | 2.9  | 1.14 | VMEQLPGHHGATGTGGVHHEK            | LYK | rep1 |
| 769.9822  | 2306.9231 | 2307.5578 | 275.09 | 3 | 3.57 | 1.56 | VMEQLPGHHGATGTGGVHHEK            | LYK | rep3 |
| 1138.7167 | 3413.1265 | 3414.6077 | 433.76 | 3 | 4.74 | 2.73 | VMEQLPGHHGSHQTGTNTTYGTTNTGGVHHEK | LYK | rep1 |
| 1138.8275 | 3413.4591 | 3414.6077 | 336.37 | 3 | 4.45 | 2.63 | VMEQLPGHHGSHQTGTNTTYGTTNTGGVHHEK | LYT | rep2 |

**Matching Genes:**

[NP\\_190666.1](#) (LTI30/XERO2 (LOW TEMPERATURE-INDUCED 30) [Arabidopsis thaliana])

**Protein Group 36**

**Expression Quality:**

| Group                 | Group Probability | Num Peptides | % Seq Coverage | Num Spectra |
|-----------------------|-------------------|--------------|----------------|-------------|
| Total (Non-Redundant) | 1                 | 10           | 18.91          | 30.0        |

**Peptides:**

| Observed | Mr(expt)  | Mr(calc)  | Mass Error (ppm) | Charge | Score | Score Delta | Peptide             | Group | Replicate |
|----------|-----------|-----------|------------------|--------|-------|-------------|---------------------|-------|-----------|
| 585.8231 | 1754.4459 | 1754.8168 | 211.35           | 3      | 2.36  | 0.84        | ADDLTGINDEEHAAGR    | LYT   | rep3      |
| 586.0504 | 1755.1278 | 1754.8168 | 177.23           | 3      | 1.49  | 0.36        | ADDLTGINDEEHAAGR    | LYK   | rep2      |
| 974.0921 | 1946.1685 | 1947.0737 | 464.92           | 2      | 3.54  | 2.05        | ANGENSAKNPSTISTTVQK | LYT   | rep1      |
| 649.8236 | 1946.4473 | 1947.0737 | 321.7            | 3      | 1.38  | 0.43        | ANGENSAKNPSTISTTVQK | LYK   | rep1      |
| 912.6889 | 1823.3621 | 1824.0102 | 355.34           | 2      | 2.49  | 1.15        | DLVNHPNFDIIAAGR     | LYK   | rep1      |
| 896.2061 | 1790.3965 | 1790.8475 | 251.84           | 2      | 3.49  | 1.67        | EASQAYEEYHEAVHK     | LYT   | rep3      |
| 895.9212 | 1789.8267 | 1790.8475 | 570.02           | 2      | 2.92  | 0.71        | EASQAYEEYHEAVHK     | LYK   | rep2      |
| 739.0879 | 1476.1602 | 1476.5948 | 294.36           | 2      | 1.6   | 0.27        | EFEAAHAGFEQLK       | LYT   | rep3      |
| 391.567  | 781.1184  | 780.8752  | 311.54           | 2      | 2.35  | 0.19        | GDALHIR             | LYK   | rep3      |
| 806.6219 | 1611.2281 | 1611.8049 | 357.89           | 2      | 2.55  | 1.17        | LTTSLNNLVDTHRK      | LYK   | rep2      |
| 806.3745 | 1610.7334 | 1611.8049 | 664.77           | 2      | 2.46  | 1.27        | LTTSLNNLVDTHRK      | LYT   | rep1      |

|           |           |           |        |   |      |      |                                                              |     |      |
|-----------|-----------|-----------|--------|---|------|------|--------------------------------------------------------------|-----|------|
| 610.2024  | 1218.3892 | 1218.3891 | 0.04   | 2 | 2.77 | 0.69 | RNSMLEAIER                                                   | LYT | rep1 |
| 652.4441  | 1302.8726 | 1303.4509 | 443.68 | 2 | 3.11 | 0.97 | RQNMLDEIER                                                   | LYT | rep1 |
| 652.7095  | 1303.4034 | 1303.4509 | 36.49  | 2 | 2.65 | 0.7  | RQNMLDEIER                                                   | LYK | rep2 |
| 1286.3643 | 2570.7129 | 2571.8485 | 441.55 | 2 | 2.71 | 1.45 | SSGGYNAGLEGLLKPADGVCGCFNK : +57.05000 (C20); +57.05000 (C22) | LYT | rep1 |

**Matching Genes:**

[NP\\_188216.2](#) ((TSA1-LIKE); unknown protein [Arabidopsis thaliana])

**Protein Group 37**

**Expression Quality:**

| Group                 | Group Probability | Num Peptides | % Seq Coverage | Num Spectra |
|-----------------------|-------------------|--------------|----------------|-------------|
| Total (Non-Redundant) | 1                 | 8            | 31.53          | 49.0        |

**Peptides:**

| Observed | Mr(expt)  | Mr(calc)  | Mass Error (ppm) | Charge | Score | Score Delta | Peptide                      | Group | Replicate |
|----------|-----------|-----------|------------------|--------|-------|-------------|------------------------------|-------|-----------|
| 858.5389 | 2572.5933 | 2573.8254 | 478.7            | 3      | 6.55  | 3.81        | ASFQNVGLDRPSDLVALSGGHTFGK    | LYK   | rep3      |
| 858.6265 | 2572.8559 | 2573.8254 | 376.68           | 3      | 5.21  | 2.88        | ASFQNVGLDRPSDLVALSGGHTFGK    | LYT   | rep2      |
| 922.7173 | 2765.1284 | 2765.1775 | 17.76            | 3      | 1.99  | 0.3         | DSLQAFFALANTNLPAPFFTLPLQLK   | LYK   | rep3      |
| 674.2176 | 1346.4195 | 1345.531  | 660.32           | 2      | 5.06  | 2.63        | FFNAFVEAMNR                  | LYK   | rep1      |
| 673.5645 | 1345.1133 | 1345.531  | 310.42           | 2      | 4.1   | 2.37        | FFNAFVEAMNR                  | LYT   | rep3      |
| 794.2461 | 1586.4766 | 1586.819  | 215.75           | 2      | 3.82  | 1.63        | MGNITPLTGTQGQIR              | LYT   | rep2      |
| 794.1053 | 1586.1949 | 1586.819  | 393.3            | 2      | 2.36  | 0.83        | MGNITPLTGTQGQIR              | LYK   | rep1      |
| 617.491  | 1232.9663 | 1233.4656 | 404.79           | 2      | 1.45  | 0.33        | MKAAVETACPR : +57.05000 (C9) | LYT   | rep1      |
| 607.0564 | 1212.0972 | 1211.3754 | 595.87           | 2      | 2.52  | 1.01        | NQCQFIMDR : +57.05000 (C3)   | LYT   | rep2      |
| 606.3299 | 1210.6441 | 1211.3754 | 603.7            | 2      | 1.6   | 0.58        | NQCQFIMDR : +57.05000 (C3)   | LYK   | rep2      |
| 974.5792 | 2920.7142 | 2921.364  | 222.43           | 3      | 2.68  | 0.79        | RDSLQAFFALANTNLPAPFFTLPLQLK  | LYK   | rep1      |
| 568.3727 | 1702.0946 | 1701.9233 | 100.61           | 3      | 2.79  | 1.3         | TPTVFDNKYYVNLK               | LYK   | rep1      |

|          |           |           |        |   |      |      |                |     |      |
|----------|-----------|-----------|--------|---|------|------|----------------|-----|------|
| 568.4823 | 1702.4234 | 1701.9233 | 293.84 | 3 | 2.55 | 1.17 | TPTVFDNKYYVNLK | LYT | rep2 |
|----------|-----------|-----------|--------|---|------|------|----------------|-----|------|

**Matching Genes:**

[NP\\_850652.1](#) (peroxidase 32 (PER32) (P32) (PRXR3) [Arabidopsis thaliana])

**Protein Group 38**

**Expression Quality:**

| Group                 | Group Probability | Num Peptides | % Seq Coverage | Num Spectra |
|-----------------------|-------------------|--------------|----------------|-------------|
| Total (Non-Redundant) | 0.99              | 9            | 16.54          | 69.0        |

**Peptides:**

| Observed | Mr(expt)  | Mr(calc)  | Mass Error (ppm) | Charge | Score | Score Delta | Peptide                                  | Group | Replicate |
|----------|-----------|-----------|------------------|--------|-------|-------------|------------------------------------------|-------|-----------|
| 838.6761 | 1675.3365 | 1675.6749 | 201.98           | 2      | 3.11  | 1.34        | ATAGDTHLGGEDFDNR                         | LYT   | rep1      |
| 838.4655 | 1674.9153 | 1675.6749 | 453.31           | 2      | 3.09  | 1.66        | ATAGDTHLGGEDFDNR                         | LYK   | rep1      |
| 863.955  | 2588.8414 | 2588.8157 | 9.92             | 3      | 2.19  | 0.53        | GEGPAIGIDLGTYSVGVWQHNR : +57.05000 (C16) | LYT   | rep1      |
| 863.8718 | 2588.592  | 2588.8157 | 86.41            | 3      | 1.7   | 0.5         | GEGPAIGIDLGTYSVGVWQHNR : +57.05000 (C16) | LYK   | rep2      |
| 830.6215 | 1659.2273 | 1659.8848 | 396.07           | 2      | 3.39  | 1.6         | IINEPTAAAIAYGLDK                         | LYT   | rep1      |
| 894.5905 | 1787.1653 | 1788.0577 | 499.09           | 2      | 3.68  | 2.05        | IINEPTAAAIAYGLDKK                        | LYT   | rep1      |
| 894.6775 | 1787.3394 | 1788.0577 | 401.74           | 2      | 3.09  | 1.74        | IINEPTAAAIAYGLDKK                        | LYK   | rep1      |
| 639.9811 | 1277.9466 | 1278.4846 | 420.84           | 2      | 3.06  | 1.48        | MVNHFVQEFK                               | LYK   | rep3      |
| 640.4624 | 1278.9092 | 1278.4846 | 332.12           | 2      | 2.97  | 1.31        | MVNHFVQEFK                               | LYT   | rep2      |

|          |           |           |        |   |      |      |                  |     |      |
|----------|-----------|-----------|--------|---|------|------|------------------|-----|------|
| 717.9392 | 1433.8628 | 1434.671  | 563.32 | 2 | 3.01 | 1.05 | MVNHFVQEFKR      | LYK | rep1 |
| 717.9734 | 1433.9312 | 1434.671  | 515.67 | 2 | 2.68 | 1.24 | MVNHFVQEFKR      | LYT | rep3 |
| 602.4823 | 1804.4234 | 1804.0439 | 210.36 | 3 | 2.71 | 0.51 | NQVAMNPVNTVFDAKR | LYK | rep1 |
| 602.3204 | 1803.9378 | 1804.0439 | 58.82  | 3 | 2.2  | 0.58 | NQVAMNPVNTVFDAKR | LYT | rep1 |
| 712.2078 | 1422.3999 | 1421.664  | 517.62 | 2 | 1.56 | 0.29 | PMIVVEYKGEEK     | LYK | rep3 |
| 719.4934 | 1436.9712 | 1436.6169 | 246.62 | 2 | 3.96 | 2.09 | VQQLLQDFFNGK     | LYT | rep1 |
| 718.9771 | 1435.9385 | 1436.6169 | 472.23 | 2 | 2.31 | 0.95 | VQQLLQDFFNGK     | LYK | rep2 |

**Matching Genes:**

[NP\\_1958.69.1](#) (heat shock cognate 70 kDa protein 2 (HSC70-2) (HSP70-2) [Arabidopsis thaliana])

**Protein Group 39**

**Expression Quality:**

| Group                 | Group Probability | Num Peptides | % Seq Coverage | Num Spectra |
|-----------------------|-------------------|--------------|----------------|-------------|
| Total (Non-Redundant) | 1                 | 7            | 41.86          | 56.0        |

**Peptides:**

| Observed  | Mr(expt)  | Mr(calc)  | Mass Error (ppm) | Charge | Score | Score Delta | Peptide                                              | Group | Replicate |
|-----------|-----------|-----------|------------------|--------|-------|-------------|------------------------------------------------------|-------|-----------|
| 943.1652  | 2826.472  | 2826.0937 | 133.85           | 3      | 4.58  | 2.79        | HTGAGILSMANSGPNTNGSQFFICTDK : +57.05000 (C24)        | LYT   | rep3      |
| 1413.6006 | 2825.1856 | 2826.0937 | 321.35           | 2      | 3.46  | 1.94        | HTGAGILSMANSGPNTNGSQFFICTDK : +57.05000 (C24)        | LYK   | rep2      |
| 1205.8961 | 3614.6649 | 3613.9572 | 195.81           | 3      | 4.48  | 2.64        | HTGAGILSMANSGPNTNGSQFFICTDKTSWLDGK : +57.05000 (C24) | LYK   | rep1      |
| 1205.3168 | 3612.9268 | 3613.9572 | 285.11           | 3      | 4.42  | 2.41        | HTGAGILSMANSGPNTNGSQFFICTDKTSWLDGK : +57.05000 (C24) | LYT   | rep2      |
| 506.9988  | 1011.982  | 1012.2099 | 225.17           | 2      | 2.64  | 1.27        | HVVFGQVVK                                            | LYK   | rep3      |
| 506.9467  | 1011.8777 | 1012.2099 | 328.16           | 2      | 2.28  | 1.09        | HVVFGQVVK                                            | LYT   | rep3      |
| 542.5409  | 1624.5992 | 1623.9436 | 403.72           | 3      | 2.98  | 0.07        | HVVFGQVVKGLDVVK                                      | LYT   | rep2      |
| 813.2819  | 1624.5481 | 1623.9436 | 372.27           | 2      | 1.69  | 0.14        | HVVFGQVVKGLDVVK                                      | LYK   | rep2      |
| 985.3523  | 2953.0334 | 2954.2667 | 417.45           | 3      | 7.28  | 4.68        | KHTGAGILSMANSGPNTNGSQFFICTDK : +57.05000 (C25)       | LYK   | rep3      |



|          |           |           |        |   |      |      |                                                |     |      |
|----------|-----------|-----------|--------|---|------|------|------------------------------------------------|-----|------|
| 985.5203 | 2953.5373 | 2954.2667 | 246.88 | 3 | 5.12 | 3.44 | KHTGAGILSMANSGPNTNGSQFFICTDK : +57.05000 (C25) | LYT | rep1 |
| 470.9024 | 939.7892  | 939.1589  | 671.13 | 2 | 2.46 | 0.75 | LGKPLHFK                                       | LYK | rep3 |
| 470.4074 | 938.7992  | 939.1589  | 383    | 2 | 1.29 | 0.17 | LGKPLHFK                                       | LYT | rep2 |
| 764.2752 | 1526.5347 | 1526.762  | 148.84 | 2 | 1.82 | 0.42 | VFFDMSLSGTPIGR                                 | LYK | rep2 |
| 764.2764 | 1526.5371 | 1526.762  | 147.24 | 2 | 1.77 | 0.62 | VFFDMSLSGTPIGR                                 | LYT | rep1 |

**Matching Genes:**

[NP\\_195213.1](#) (ROC5 (ROTAMASE CYP 5); peptidyl-prolyl cis-trans isomerase [Arabidopsis thaliana])

**Protein Group 40**

**Expression Quality:**

| Group                 | Group Probability | Num Peptides | % Seq Coverage | Num Spectra |
|-----------------------|-------------------|--------------|----------------|-------------|
| Total (Non-Redundant) | 1                 | 8            | 35.27          | 35.0        |

**Peptides:**

| Observed | Mr(expt)  | Mr(calc)  | Mass Error (ppm) | Charge | Score | Score Delta | Peptide                     | Group | Replicate |
|----------|-----------|-----------|------------------|--------|-------|-------------|-----------------------------|-------|-----------|
| 509.1214 | 1016.2271 | 1016.1805 | 45.88            | 2      | 2.3   | 0.76        | AMIGQVAGGGR                 | LYT   | rep2      |
| 899.7385 | 2696.1921 | 2696.9287 | 273.13           | 3      | 5.73  | 3.65        | GVAMNPVEHPHGGGNHQHIGHASTVR  | LYK   | rep3      |
| 899.8647 | 2696.5708 | 2696.9287 | 132.72           | 3      | 4.2   | 2.2         | GVAMNPVEHPHGGGNHQHIGHASTVR  | LYT   | rep3      |
| 951.8729 | 2852.5953 | 2853.115  | 182.14           | 3      | 3.15  | 1.61        | GVAMNPVEHPHGGGNHQHIGHASTVRR | LYK   | rep1      |
| 951.7012 | 2852.08   | 2853.115  | 362.74           | 3      | 2.2   | 0.88        | GVAMNPVEHPHGGGNHQHIGHASTVRR | LYT   | rep2      |
| 647.0866 | 1292.1575 | 1292.4462 | 223.34           | 2      | 2.59  | 1.11        | GVVTEIIHDPGR                | LYT   | rep1      |
| 646.8516 | 1291.6875 | 1292.4462 | 586.96           | 2      | 1.39  | 0.24        | GVVTEIIHDPGR                | LYK   | rep2      |
| 691.2596 | 1380.5035 | 1379.6964 | 584.95           | 2      | 3.04  | 0.99        | KATLVVGNVPLR                | LYT   | rep1      |
| 690.6278 | 1379.24   | 1379.6964 | 330.78           | 2      | 1.45  | 0.06        | KATLVVGNVPLR                | LYK   | rep2      |

|          |           |           |         |   |      |      |                                     |     |      |
|----------|-----------|-----------|---------|---|------|------|-------------------------------------|-----|------|
| 988.1659 | 1974.3162 | 1975.1539 | 424.12  | 2 | 3.52 | 2.04 | SIPEGAVVCNVEHHVGDR : +57.05000 (C9) | LYK | rep1 |
| 988.1149 | 1974.2141 | 1975.1539 | 475.79  | 2 | 2.99 | 1.4  | SIPEGAVVCNVEHHVGDR : +57.05000 (C9) | LYT | rep3 |
| 984.6569 | 2950.9471 | 2952.2466 | 440.16  | 3 | 3.89 | 1.83 | VRGVAMNPVEHPHGGGNHGHASTVR           | LYK | rep3 |
| 354.2559 | 1059.7441 | 1059.2284 | 486.88  | 3 | 1.98 | 0.46 | VTFRHPFR                            | LYT | rep1 |
| 531.168  | 1060.3203 | 1059.2284 | 1030.91 | 2 | 1.92 | 0.22 | VTFRHPFR                            | LYK | rep1 |

**Matching Genes:**

[NP\\_179393.1](#) (EMB2296 (EMBRYO DEFECTIVE 2296); structural constituent of ribosome [Arabidopsis thaliana])

**Protein Group 41**

**Expression Quality:**

| Group                 | Group Probability | Num Peptides | % Seq Coverage | Num Spectra |
|-----------------------|-------------------|--------------|----------------|-------------|
| Total (Non-Redundant) | 1                 | 7            | 35.24          | 37.0        |

**Peptides:**

| Observed  | Mr(expt)  | Mr(calc)  | Mass Error (ppm) | Charge | Score | Score Delta | Peptide                             | Group | Replicate |
|-----------|-----------|-----------|------------------|--------|-------|-------------|-------------------------------------|-------|-----------|
| 1175.4304 | 2348.8452 | 2349.5615 | 304.85           | 2      | 1.9   | 0.58        | ELVKDDAWLDGEFISTVQQR                | LYT   | rep3      |
| 1443.2195 | 2884.4234 | 2884.4304 | 2.44             | 2      | 3.62  | 1.46        | GIMLGADQPVILHMLDIPPAEALNGVK         | LYT   | rep1      |
| 592.1202  | 1773.3372 | 1773.9714 | 357.51           | 3      | 4.58  | 2.44        | KLSSALSAASSACDHIR : +57.05000 (C13) | LYT   | rep2      |
| 592.2274  | 1773.6588 | 1773.9714 | 176.26           | 3      | 4.54  | 2.23        | KLSSALSAASSACDHIR : +57.05000 (C13) | LYK   | rep1      |
| 823.6116  | 1645.2076 | 1645.7985 | 359.08           | 2      | 3.38  | 1.78        | LSSALSAASSACDHIR : +57.05000 (C12)  | LYT   | rep1      |
| 549.6132  | 1645.816  | 1645.7985 | 10.61            | 3      | 2.56  | 1.2         | LSSALSAASSACDHIR : +57.05000 (C12)  | LYK   | rep2      |
| 681.2234  | 1360.4312 | 1360.667  | 173.29           | 2      | 4.79  | 2           | MELIDAAFPLK                         | LYT   | rep2      |
| 681.0581  | 1360.1006 | 1360.667  | 416.24           | 2      | 3.5   | 1.22        | MELIDAAFPLK                         | LYK   | rep2      |
| 1133.6028 | 2265.19   | 2266.4375 | 550.43           | 2      | 4.99  | 2.96        | NVIIWGNHSSSQYPDVNHAK                | LYK   | rep3      |
| 1134.1729 | 2266.3301 | 2266.4375 | 47.38            | 2      | 4.77  | 2.99        | NVIIWGNHSSSQYPDVNHAK                | LYT   | rep2      |
| 667.6772  | 2000.0083 | 2000.4173 | 204.5            | 3      | 2.75  | 0.93        | VLVTGAAGQIGYALVPMIAR                | LYT   | rep2      |

**Matching Genes:**

[NP\\_171936.1](#) (malate dehydrogenase, cytosolic, putative [Arabidopsis thaliana])

---

**Protein Group 42**

**Expression Quality:**

| Group                 | Group Probability | Num Peptides | % Seq Coverage | Num Spectra |
|-----------------------|-------------------|--------------|----------------|-------------|
| Total (Non-Redundant) | 1                 | 6            | 34.06          | 27.0        |

**Peptides:**

| Observed  | Mr(expt)  | Mr(calc)  | Mass Error (ppm) | Charge | Score | Score Delta | Peptide                                     | Group | Replicate |
|-----------|-----------|-----------|------------------|--------|-------|-------------|---------------------------------------------|-------|-----------|
| 738.3621  | 1474.7085 | 1475.5653 | 580.63           | 2      | 3.28  | 0.83        | DLLYKDHNSDQK                                | LYK   | rep3      |
| 738.7715  | 1475.5274 | 1475.5653 | 25.7             | 2      | 2.52  | 0.33        | DLLYKDHNSDQK                                | LYT   | rep2      |
| 1410.8192 | 4229.4342 | 4229.6758 | 57.12            | 3      | 6.54  | 4.5         | EDLIASLTVNDKGDLLNASYYHIVNPLFNTAVGA<br>EVSHK | LYT   | rep1      |
| 1410.5936 | 4228.7574 | 4229.6758 | 217.12           | 3      | 5.23  | 3.51        | EDLIASLTVNDKGDLLNASYYHIVNPLFNTAVGA<br>EVSHK | LYK   | rep2      |
| 977.5278  | 2929.56   | 2930.2429 | 233.05           | 3      | 5.88  | 3.71        | GDLLNASYYHIVNPLFNTAVGA<br>EVSHK             | LYT   | rep3      |
| 977.4979  | 2929.4703 | 2930.2429 | 263.67           | 3      | 4.77  | 2.99        | GDLLNASYYHIVNPLFNTAVGA<br>EVSHK             | LYK   | rep2      |
| 582.0393  | 1162.063  | 1162.3404 | 238.67           | 2      | 2.38  | 1.08        | GPGLYTEIGKK                                 | LYK   | rep2      |
| 581.9488  | 1161.8819 | 1162.3404 | 394.52           | 2      | 2.34  | 0.74        | GPGLYTEIGKK                                 | LYT   | rep3      |
| 760.9322  | 1519.8487 | 1518.7196 | 743.44           | 2      | 3.73  | 1.32        | KGDLLGDVAFQSR                               | LYK   | rep2      |
| 759.9248  | 1517.834  | 1518.7196 | 583.1            | 2      | 2.96  | 0.94        | KGDLLGDVAFQSR                               | LYT   | rep1      |
| 975.638   | 1949.2603 | 1949.2224 | 19.44            | 2      | 4.18  | 2.18        | VNSAGIASALIQHEWKPK                          | LYK   | rep3      |
| 975.2571  | 1948.4986 | 1949.2224 | 371.34           | 2      | 3.51  | 2.1         | VNSAGIASALIQHEWKPK                          | LYT   | rep2      |

**Matching Genes:**

[NP\\_186777.1](#) (porin, putative [Arabidopsis thaliana])

---

**Protein Group 43****Expression Quality:**

| Group                 | Group Probability | Num Peptides | % Seq Coverage | Num Spectra |
|-----------------------|-------------------|--------------|----------------|-------------|
| Total (Non-Redundant) | 1                 | 10           | 35.41          | 56.0        |

**Peptides:**

| Observed  | Mr(expt)  | Mr(calcd) | Mass Error (ppm) | Charge | Score | Score Delta | Peptide                        | Group | Replicate |
|-----------|-----------|-----------|------------------|--------|-------|-------------|--------------------------------|-------|-----------|
| 695.083   | 1388.1504 | 1388.5707 | 302.64           | 2      | 2.49  | 0.92        | ELDYLVGAVANPK                  | LYK   | rep3      |
| 489.7561  | 1466.2448 | 1465.808  | 298.04           | 3      | 4.55  | 2.17        | FLKPSVAGFLMQK                  | LYK   | rep3      |
| 489.5607  | 1465.6587 | 1465.808  | 101.83           | 3      | 3.84  | 1.3         | FLKPSVAGFLMQK                  | LYT   | rep3      |
| 573.3002  | 1716.877  | 1716.8054 | 41.72            | 3      | 1.43  | 0.31        | FYAEEEEKNDPEFAK                | LYT   | rep3      |
| 791.3812  | 2371.1202 | 2370.707  | 174.29           | 3      | 1.89  | 0.28        | GVSLLLPTDVVIADKFAPDANSK        | LYK   | rep1      |
| 678.4752  | 2032.4022 | 2032.2682 | 65.94            | 3      | 2.24  | 0.09        | KLAALADVYNDAFGTAHR             | LYT   | rep1      |
| 1075.5376 | 1074.5298 | 1074.2781 | 234.31           | 1      | 2.28  | 0.65        | KPFAAIVGGSK                    | LYT   | rep3      |
| 537.885   | 1073.7544 | 1074.2781 | 487.43           | 2      | 1.75  | 0.25        | KPFAAIVGGSK                    | LYK   | rep3      |
| 635.8317  | 1904.4715 | 1904.0953 | 197.57           | 3      | 3.75  | 2.04        | LAALADVYNDAFGTAHR              | LYK   | rep1      |
| 636.0225  | 1905.0439 | 1904.0953 | 498.18           | 3      | 2.09  | 0.87        | LAALADVYNDAFGTAHR              | LYT   | rep2      |
| 955.5889  | 2863.7431 | 2863.2566 | 169.93           | 3      | 1.8   | 0.45        | MSHISTGGGASLELLEGGKPLPGVLALDEA | LYT   | rep2      |
| 634.6123  | 1267.209  | 1265.5322 | 1325             | 2      | 3.19  | 1.7         | VVLCSHLGRPK : +57.05000 (C4)   | LYT   | rep3      |
| 633.5482  | 1265.0808 | 1265.5322 | 356.65           | 2      | 3.02  | 1.41        | VVLCSHLGRPK : +57.05000 (C4)   | LYK   | rep3      |
| 358.3953  | 1072.1623 | 1072.3053 | 133.33           | 3      | 2.26  | 0.67        | YSLKPLVPR                      | LYT   | rep3      |
| 358.5236  | 1072.5472 | 1072.3053 | 225.6            | 3      | 2.06  | 0.87        | YSLKPLVPR                      | LYK   | rep2      |

**Matching Genes:**

[NP\\_178073.1](#) (PGK (PHOSPHOGLYCERATE KINASE) [*Arabidopsis thaliana*])

**Protein Group 44****Expression Quality:**

| Group                 | Group Probability | Num Peptides | % Seq Coverage | Num Spectra |
|-----------------------|-------------------|--------------|----------------|-------------|
| Total (Non-Redundant) | 1                 | 8            | 46.67          | 46.0        |

**Peptides:**

| Observed  | Mr(expt)  | Mr(calc)  | Mass Error (ppm) | Charge | Score | Score Delta | Peptide                                 | Group | Replicate |
|-----------|-----------|-----------|------------------|--------|-------|-------------|-----------------------------------------|-------|-----------|
| 1221.847  | 2441.6783 | 2442.7717 | 447.63           | 2      | 2.59  | 1.29        | AGEALYALGAYFATTTTPVTPAKK                | LYT   | rep1      |
| 947.7298  | 1893.4439 | 1893.1791 | 139.88           | 2      | 2.51  | 1.36        | ASELLHQFGVHVMPLTN                       | LYK   | rep2      |
| 946.974   | 1891.9324 | 1893.1791 | 658.5            | 2      | 1.88  | 0.55        | ASELLHQFGVHVMPLTN                       | LYT   | rep3      |
| 669.8052  | 1337.5948 | 1337.4886 | 79.35            | 2      | 2.31  | 0.91        | EEGHKIVGFHGK                            | LYT   | rep1      |
| 1426.0245 | 4275.0501 | 4276.5952 | 361.29           | 3      | 5.13  | 2.92        | GAENIVGGEHGKPTLLGFEEFEIDYPSEYITAVEGTYDK | LYK   | rep2      |
| 1426.1774 | 4275.5086 | 4276.5952 | 254.07           | 3      | 4.82  | 3.17        | GAENIVGGEHGKPTLLGFEEFEIDYPSEYITAVEGTYDK | LYT   | rep3      |
| 1043.3113 | 2084.607  | 2085.3293 | 346.4            | 2      | 4.77  | 3           | KVHVGQGQDGVSSINVVYAK                    | LYK   | rep3      |
| 696.1031  | 2085.286  | 2085.3293 | 20.79            | 3      | 4.75  | 2.5         | KVHVGQGQDGVSSINVVYAK                    | LYT   | rep1      |
| 393.5314  | 785.0472  | 784.9086  | 176.5            | 2      | 2.06  | 0           | LVGFHGR                                 | LYK   | rep3      |
| 657.1935  | 1968.557  | 1968.998  | 224.01           | 3      | 2.56  | 1.15        | VEAGGGAGGASWDDGVHDGVR                   | LYT   | rep1      |
| 657.3512  | 1969.0301 | 1968.998  | 16.29            | 3      | 1.3   | 0.24        | VEAGGGAGGASWDDGVHDGVR                   | LYK   | rep2      |
| 979.0247  | 1956.0337 | 1957.1565 | 573.67           | 2      | 3.61  | 2.25        | VHVGQGQDGVSSINVVYAK                     | LYK   | rep2      |
| 978.9491  | 1955.8826 | 1957.1565 | 650.88           | 2      | 1.49  | 0.55        | VHVGQGQDGVSSINVVYAK                     | LYT   | rep3      |

**Matching Genes:**

[NP\\_001030711.1](#) (jacalin lectin family protein [Arabidopsis thaliana])

**Protein Group 45**

**Expression Quality:**

| Group                 | Group Probability | Num Peptides | % Seq Coverage | Num Spectra |
|-----------------------|-------------------|--------------|----------------|-------------|
| Total (Non-Redundant) | 1                 | 6            | 52.32          | 60.0        |

**Peptides:**

| Observed  | Mr(expt)  | Mr(cal)   | Mass Error (ppm) | Charge | Score | Score Delta | Peptide                            | Group | Replicate |
|-----------|-----------|-----------|------------------|--------|-------|-------------|------------------------------------|-------|-----------|
| 1168.8676 | 3503.5792 | 3504.7056 | 321.39           | 3      | 5.52  | 2.67        | DENHLFPDAIGHHHIQGVTVHDGEWDSHEAIK   | LYK   | rep3      |
| 1168.8781 | 3503.6107 | 3504.7056 | 312.4            | 3      | 3.81  | 1.61        | DENHLFPDAIGHHHIQGVTVHDGEWDSHEAIK   | LYT   | rep3      |
| 621.0298  | 1240.044  | 1240.4347 | 314.97           | 2      | 3.72  | 1.62        | GLEGHVMEQLK                        | LYK   | rep1      |
| 621.138   | 1240.2603 | 1240.4347 | 140.59           | 2      | 3.63  | 1.39        | GLEGHVMEQLK                        | LYT   | rep3      |
| 538.9132  | 1075.8108 | 1076.3174 | 470.63           | 2      | 2.19  | 0.39        | ITMIWEKR                           | LYT   | rep2      |
| 538.8972  | 1075.7788 | 1076.3174 | 500.34           | 2      | 1.81  | 0.02        | ITMIWEKR                           | LYK   | rep1      |
| 879.1857  | 1756.3557 | 1756.9809 | 355.84           | 2      | 5.13  | 2.49        | IWNYTCDGKPEVFK : +57.05000 (C6)    | LYK   | rep1      |
| 879.2616  | 1756.5076 | 1756.9809 | 269.41           | 2      | 4.3   | 2.35        | IWNYTCDGKPEVFK : +57.05000 (C6)    | LYT   | rep3      |
| 707.5858  | 1413.156  | 1413.602  | 315.5            | 2      | 2.01  | 0.5         | SVVADMDEHVLKA                      | LYK   | rep1      |
| 707.8329  | 1413.6502 | 1413.602  | 34.06            | 2      | 1.35  | 0.14        | SVVADMDEHVLKA                      | LYT   | rep1      |
| 1282.8646 | 3845.5704 | 3847.103  | 398.38           | 3      | 6.42  | 4.36        | WRDENHLFPDAIGHHHIQGVTVHDGEWDSHEAIK | LYK   | rep3      |
| 1282.8966 | 3845.6663 | 3847.103  | 373.44           | 3      | 5.33  | 3.63        | WRDENHLFPDAIGHHHIQGVTVHDGEWDSHEAIK | LYT   | rep1      |

**Matching Genes:**

[NP\\_565265.1](#) (major latex protein-related / MLP-related [Arabidopsis thaliana])

**Protein Group 46**

**Expression Quality:**

| Group                 | Group Probability | Num Peptides | % Seq Coverage | Num Spectra |
|-----------------------|-------------------|--------------|----------------|-------------|
| Total (Non-Redundant) | 1                 | 7            | 63.37          | 61.0        |

**Peptides:**

| Observed | Mr(expt)  | Mr(calc)  | Mass Error (ppm) | Charge | Score | Score Delta | Peptide      | Group | Replicate |
|----------|-----------|-----------|------------------|--------|-------|-------------|--------------|-------|-----------|
| 599.4961 | 1196.9766 | 1197.3912 | 346.27           | 2      | 2.84  | 1.16        | GVGGTGKPLHFK | LYK   | rep3      |
| 599.391  | 1196.7664 | 1197.3912 | 521.83           | 2      | 2.44  | 0.88        | GVGGTGKPLHFK | LYT   | rep3      |

|           |           |           |        |   |      |      |                                                     |     |      |
|-----------|-----------|-----------|--------|---|------|------|-----------------------------------------------------|-----|------|
| 1397.896  | 2793.7764 | 2794.138  | 129.42 | 2 | 3.72 | 1.57 | HTGPGILSMANAGANTNGSQFFICTVK : +57.05000 (C24)       | LYK | rep3 |
| 932.2632  | 2793.7661 | 2794.138  | 133.12 | 3 | 3.36 | 1.54 | HTGPGILSMANAGANTNGSQFFICTVK : +57.05000 (C24)       | LYT | rep3 |
| 813.1731  | 1624.3306 | 1624.8852 | 341.34 | 2 | 3.31 | 0.84 | HVVFGQVVEGLDVVK                                     | LYT | rep1 |
| 542.5947  | 1624.7607 | 1624.8852 | 76.64  | 3 | 3.22 | 0.05 | HVVFGQVVEGLDVVK                                     | LYK | rep3 |
| 733.9283  | 1465.8409 | 1465.7201 | 82.4   | 2 | 3.02 | 1.25 | IVMELYTDKTPR                                        | LYK | rep1 |
| 733.8836  | 1465.7515 | 1465.7201 | 21.44  | 2 | 1.84 | 0.45 | IVMELYTDKTPR                                        | LYT | rep2 |
| 974.6825  | 2921.024  | 2922.3109 | 440.38 | 3 | 7.53 | 5.03 | KHTGPGILSMANAGANTNGSQFFICTVK : +57.05000 (C25)      | LYK | rep3 |
| 974.813   | 2921.4155 | 2922.3109 | 306.42 | 3 | 6.95 | 4.56 | KHTGPGILSMANAGANTNGSQFFICTVK : +57.05000 (C25)      | LYT | rep1 |
| 813.8361  | 2438.4847 | 2440.759  | 931.81 | 3 | 1.7  | 0.6  | TDWLDGKHVVFGQVVEGLDVVK                              | LYT | rep3 |
| 1278.0138 | 3831.0179 | 3832.0775 | 276.51 | 3 | 2.81 | 1.5  | VIPNFMCGGDFTAGNGTGGESIYGSKFEDENFER : +57.05000 (C7) | LYK | rep1 |
| 1278.318  | 3831.9305 | 3832.0775 | 38.36  | 3 | 1.48 | 0.41 | VIPNFMCGGDFTAGNGTGGESIYGSKFEDENFER : +57.05000 (C7) | LYT | rep2 |

**Matching Genes:**

[NP\\_195585.1](#) (ROC1 (rotamase CyP 1); peptidyl-prolyl cis-trans isomerase [Arabidopsis thaliana])

**Protein Group 47**

**Expression Quality:**

| Group                 | Group Probability | Num Peptides | % Seq Coverage | Num Spectra |
|-----------------------|-------------------|--------------|----------------|-------------|
| Total (Non-Redundant) | 1                 | 8            | 52.58          | 49.0        |

**Peptides:**

| Observed | Mr(expt)  | Mr(calc)  | Mass Error (ppm) | Charge | Score | Score Delta | Peptide                             | Group | Replicate |
|----------|-----------|-----------|------------------|--------|-------|-------------|-------------------------------------|-------|-----------|
| 600.4198 | 1798.2359 | 1797.9516 | 158.16           | 3      | 2.13  | 0.62        | AAVGAPDHLGDCPFSQR : +57.05000 (C12) | LYT   | rep1      |

|           |           |           |        |   |      |      |                          |     |      |
|-----------|-----------|-----------|--------|---|------|------|--------------------------|-----|------|
| 811.9911  | 2432.9498 | 2433.5937 | 264.61 | 3 | 2.11 | 0.79 | DSNDGSEHALLVELEALENHLK   | LYT | rep1 |
| 1225.1126 | 2448.2095 | 2449.8122 | 654.23 | 2 | 4.88 | 2.61 | IHLINLSDKPQWFLDISPQGK    | LYK | rep3 |
| 817.5967  | 2449.7666 | 2449.8122 | 18.65  | 3 | 1.75 | 0.6  | IHLINLSDKPQWFLDISPQGK    | LYT | rep2 |
| 713.5885  | 1425.1614 | 1425.6821 | 365.23 | 2 | 3.89 | 1.89 | LYHLQVALGHFK             | LYT | rep3 |
| 713.4141  | 1424.8125 | 1425.6821 | 609.94 | 2 | 3.86 | 1.98 | LYHLQVALGHFK             | LYK | rep2 |
| 593.6028  | 1185.19   | 1185.2511 | 51.56  | 2 | 1.58 | 0.54 | SHDGPFIAGER              | LYT | rep3 |
| 883.709   | 2648.1035 | 2648.8442 | 279.65 | 3 | 5.01 | 2.3  | SKDSNDGSEHALLVELEALENHLK | LYK | rep3 |
| 883.8149  | 2648.4213 | 2648.8442 | 159.65 | 3 | 4.85 | 2.81 | SKDSNDGSEHALLVELEALENHLK | LYT | rep3 |
| 972.974   | 1943.9324 | 1945.1694 | 635.94 | 2 | 3.52 | 1.79 | SWSVPESFPHVHNYMK         | LYK | rep3 |
| 973.2818  | 1944.5479 | 1945.1694 | 319.53 | 2 | 3.05 | 1.34 | SWSVPESFPHVHNYMK         | LYT | rep3 |
| 550.3504  | 1098.6851 | 1099.2826 | 543.52 | 2 | 1.8  | 0.55 | VSAVDLSLAPK              | LYT | rep1 |

**Matching Genes:**

[NP\\_173387.1](#) (DHAR1 (DEHYDROASCORBATE REDUCTASE); glutathione dehydrogenase (ascorbate) [Arabidopsis thaliana])

**Protein Group 48**

**Expression Quality:**

| Group                 | Group Probability | Num Peptides | % Seq Coverage | Num Spectra |
|-----------------------|-------------------|--------------|----------------|-------------|
| Total (Non-Redundant) | 1                 | 8            | 31.34          | 40.0        |

**Peptides:**

| Observed | Mr(expt)  | Mr(calcd) | Mass Error (ppm) | Charge | Score | Score Delta | Peptide                       | Group | Replicate |
|----------|-----------|-----------|------------------|--------|-------|-------------|-------------------------------|-------|-----------|
| 964.4705 | 2890.3879 | 2888.1579 | 772.1            | 3      | 3.31  | 1.42        | ALDWGPGGGPDLIVDDGGDATLLIHEGVK | LYK   | rep2      |
| 963.1738 | 2886.498  | 2888.1579 | 574.74           | 3      | 2.56  | 0.97        | ALDWGPGGGPDLIVDDGGDATLLIHEGVK | LYT   | rep2      |
| 565.3562 | 1128.6968 | 1129.359  | 586.34           | 2      | 2.19  | 0.62        | DIIMVDHMR                     | LYT   | rep3      |
| 565.7847 | 1129.5537 | 1129.359  | 172.44           | 2      | 1.7   | 0.02        | DIIMVDHMR                     | LYK   | rep2      |



|           |           |           |        |   |      |      |                                                                        |     |      |
|-----------|-----------|-----------|--------|---|------|------|------------------------------------------------------------------------|-----|------|
| 783.7955  | 2348.3631 | 2349.5632 | 510.78 | 3 | 1.97 | 0.68 | DQSDYVSIPVEGPKPVHYR                                                    | LYT | rep1 |
| 513.6719  | 1025.3282 | 1025.1874 | 137.34 | 2 | 1.77 | 0.6  | HSLPDGLMR                                                              | LYT | rep2 |
| 513.6179  | 1025.2202 | 1025.1874 | 32.08  | 2 | 1.53 | 0.44 | HSLPDGLMR                                                              | LYK | rep2 |
| 1262.3226 | 3783.9444 | 3784.3387 | 104.18 | 3 | 4.94 | 2.63 | LMNLGCATGHPSFVMSCSFTNQVIAQLELWNEK : +57.05000 (C6);<br>+57.05000 (C17) | LYK | rep1 |
| 1262.0262 | 3783.0553 | 3784.3387 | 339.14 | 3 | 3.88 | 1.6  | LMNLGCATGHPSFVMSCSFTNQVIAQLELWNEK : +57.05000 (C6);<br>+57.05000 (C17) | LYT | rep3 |
| 739.3221  | 1476.6285 | 1475.6499 | 663.14 | 2 | 2.41 | 1.14 | LVGVSEETTTGVKR                                                         | LYT | rep1 |
| 738.6745  | 1475.3333 | 1475.6499 | 214.55 | 2 | 2.27 | 1.01 | LVGVSEETTTGVKR                                                         | LYK | rep1 |
| 1064.7548 | 3191.2408 | 3190.578  | 207.73 | 3 | 4.92 | 2.99 | NNAIVCNIGHFDNEIDMLGLETYPGVKR : +57.05000 (C6)                          | LYT | rep2 |
| 1064.6537 | 3190.9376 | 3190.578  | 112.69 | 3 | 4.61 | 3.06 | NNAIVCNIGHFDNEIDMLGLETYPGVKR : +57.05000 (C6)                          | LYK | rep1 |
| 630.5091  | 1259.0025 | 1259.395  | 311.68 | 2 | 2.96 | 1.16 | SKFDNLYGCR : +57.05000 (C9)                                            | LYT | rep1 |
| 630.2233  | 1258.4309 | 1259.395  | 765.5  | 2 | 2.18 | 0.92 | SKFDNLYGCR : +57.05000 (C9)                                            | LYK | rep2 |

**Matching Genes:**

[NP\\_189023.1](#) (SAHH2 (S-ADENOSYL-L-HOMOCYSTEINE (SAH) HYDROLASE 2); adenosylhomocysteinase [Arabidopsis thaliana])

**Protein Group 49**

**Expression Quality:**

| Group                 | Group Probability | Num Peptides | % Seq Coverage | Num Spectra |
|-----------------------|-------------------|--------------|----------------|-------------|
| Total (Non-Redundant) | 1                 | 8            | 35.27          | 29.0        |

**Peptides:**

| Observed | Mr(expt)  | Mr(calc)  | Mass Error (ppm) | Charge | Score | Score Delta | Peptide                     | Group | Replicate |
|----------|-----------|-----------|------------------|--------|-------|-------------|-----------------------------|-------|-----------|
| 509.1214 | 1016.2271 | 1016.1805 | 45.88            | 2      | 2.3   | 0.76        | AMIGQVAGGGR                 | LYT   | rep2      |
| 899.7385 | 2696.1921 | 2696.9287 | 273.13           | 3      | 5.73  | 3.65        | GVAMNPVEHPHGGGNHQHIGHASTVR  | LYK   | rep3      |
| 899.8647 | 2696.5708 | 2696.9287 | 132.72           | 3      | 4.2   | 2.2         | GVAMNPVEHPHGGGNHQHIGHASTVR  | LYT   | rep3      |
| 951.8729 | 2852.5953 | 2853.115  | 182.14           | 3      | 3.15  | 1.61        | GVAMNPVEHPHGGGNHQHIGHASTVRR | LYK   | rep1      |

|          |           |           |        |   |      |      |                                      |     |      |
|----------|-----------|-----------|--------|---|------|------|--------------------------------------|-----|------|
| 951.7012 | 2852.08   | 2853.115  | 362.74 | 3 | 2.2  | 0.88 | GVAMNPVEHPHGGGNHGHASTVRR             | LYT | rep2 |
| 647.0866 | 1292.1575 | 1292.4462 | 223.34 | 2 | 2.59 | 1.11 | GVVTEIHD PGR                         | LYT | rep1 |
| 646.8516 | 1291.6875 | 1292.4462 | 586.96 | 2 | 1.39 | 0.24 | GVVTEIHD PGR                         | LYK | rep2 |
| 691.2596 | 1380.5035 | 1379.6964 | 584.95 | 2 | 3.04 | 0.99 | KATLVVGNV LPLR                       | LYT | rep1 |
| 690.6278 | 1379.24   | 1379.6964 | 330.78 | 2 | 1.45 | 0.06 | KATLVVGNV LPLR                       | LYK | rep2 |
| 995.1333 | 1988.251  | 1989.1806 | 467.31 | 2 | 1.55 | 0.46 | SIPEGAVICNVEHHV GDR : +57.05000 (C9) | LYT | rep3 |
| 344.1205 | 1029.3382 | 1029.2023 | 132.04 | 3 | 1.99 | 0.63 | VAFRHPFR                             | LYT | rep1 |
| 984.6569 | 2950.9471 | 2952.2466 | 440.16 | 3 | 3.89 | 1.83 | VRGVAMNPVEHPHGGGNHGHASTVR            | LYK | rep3 |

**Matching Genes:**

[NP\\_195336.1](#) (60S ribosomal protein L8 (RPL8C) [Arabidopsis thaliana])

**Protein Group 50**

**Expression Quality:**

| Group                 | Group Probability | Num Peptides | % Seq Coverage | Num Spectra |
|-----------------------|-------------------|--------------|----------------|-------------|
| Total (Non-Redundant) | 1                 | 9            | 51.55          | 29.0        |

**Peptides:**

| Observed | Mr(expt)  | Mr(calc)  | Mass Error (ppm) | Charge | Score | Score Delta | Peptide           | Group | Replicate |
|----------|-----------|-----------|------------------|--------|-------|-------------|-------------------|-------|-----------|
| 598.6167 | 1792.8266 | 1792.9946 | 93.7             | 3      | 1.85  | 0.14        | FVYAHFPINASIGGDGK | LYK   | rep3      |
| 598.6774 | 1793.0086 | 1792.9946 | 7.81             | 3      | 1.66  | 0.29        | FVYAHFPINASIGGDGK | LYT   | rep1      |
| 621.158  | 1240.3003 | 1240.456  | 125.53           | 2      | 1.92  | 0.64        | HLNLDFQLIK        | LYK   | rep2      |
| 624.1321 | 1869.3728 | 1868.1029 | 679.76           | 3      | 4.22  | 0.71        | HLNLDFQLIKDPETGK  | LYK   | rep2      |
| 623.755  | 1868.2415 | 1868.1029 | 74.22            | 3      | 3.47  | 0.7         | HLNLDFQLIKDPETGK  | LYT   | rep1      |
| 650.0015 | 1297.9873 | 1298.4891 | 386.44           | 2      | 1.83  | 0.42        | KFLDGIYVSEK       | LYT   | rep1      |
| 680.7506 | 1359.4856 | 1359.6406 | 113.99           | 2      | 2.01  | 0.29        | KVEMLDGVTIVR      | LYT   | rep1      |
| 680.7332 | 1359.4507 | 1359.6406 | 139.66           | 2      | 1.92  | 0.58        | KVEMLDGVTIVR      | LYK   | rep2      |

|          |           |           |        |   |      |      |                     |     |      |
|----------|-----------|-----------|--------|---|------|------|---------------------|-----|------|
| 612.1354 | 1222.2552 | 1222.3976 | 116.5  | 2 | 2.05 | 0.57 | LKIDSWFGTR          | LYT | rep1 |
| 694.597  | 2080.7677 | 2080.3779 | 187.34 | 3 | 2.08 | 0.36 | MRFVYAHFPINASIGGDGK | LYK | rep2 |
| 694.4889 | 2080.4432 | 2080.3779 | 31.38  | 3 | 1.91 | 0.38 | MRFVYAHFPINASIGGDGK | LYT | rep1 |
| 792.538  | 1583.0603 | 1582.7637 | 187.44 | 2 | 3.32 | 1.53 | TALSHVDNLISGVTR     | LYK | rep2 |
| 792.1719 | 1582.3282 | 1582.7637 | 275.15 | 2 | 2.78 | 1.58 | TALSHVDNLISGVTR     | LYT | rep1 |
| 639.09   | 1914.2464 | 1914.1267 | 62.55  | 3 | 4.91 | 2.64 | VKDEIVLDGNDIELVSR   | LYT | rep1 |
| 639.0712 | 1914.19   | 1914.1267 | 33.08  | 3 | 4.52 | 2.35 | VKDEIVLDGNDIELVSR   | LYK | rep2 |

**Matching Genes:**

[NP\\_564417.1](#) (60S ribosomal protein L9 (RPL90B) [Arabidopsis thaliana])

**Protein Group 51**

**Expression Quality:**

| Group                 | Group Probability | Num Peptides | % Seq Coverage | Num Spectra |
|-----------------------|-------------------|--------------|----------------|-------------|
| Total (Non-Redundant) | 1                 | 8            | 64.24          | 88.0        |

**Peptides:**

| Observed | Mr(expt)  | Mr(calc)  | Mass Error (ppm) | Charge | Score | Score Delta | Peptide       | Group | Replicate |
|----------|-----------|-----------|------------------|--------|-------|-------------|---------------|-------|-----------|
| 619.2793 | 1236.543  | 1235.4181 | 910.56           | 2      | 2.97  | 1.11        | GLDGHVMEHLK   | LYK   | rep3      |
| 618.5367 | 1235.0577 | 1235.4181 | 291.74           | 2      | 2.4   | 0.73        | GLDGHVMEHLK   | LYT   | rep2      |
| 538.9132 | 1075.8108 | 1076.3174 | 470.63           | 2      | 2.19  | 0.39        | ITMIWEKR      | LYT   | rep2      |
| 538.8972 | 1075.7788 | 1076.3174 | 500.34           | 2      | 1.81  | 0.02        | ITMIWEKR      | LYK   | rep1      |
| 720.6922 | 1439.3687 | 1439.6427 | 190.33           | 2      | 1.87  | 0.87        | QMVVDIEGHVNKA | LYK   | rep1      |
| 480.7535 | 1439.237  | 1439.6427 | 281.83           | 3      | 1.7   | 0.3         | QMVVDIEGHVNKA | LYT   | rep3      |
| 464.7783 | 1391.3113 | 1391.6045 | 210.68           | 3      | 2.97  | 1.13        | RGLDGHVMEHLK  | LYT   | rep1      |
| 464.9263 | 1391.7555 | 1391.6045 | 108.53           | 3      | 2.91  | 1           | RGLDGHVMEHLK  | LYK   | rep3      |
| 778.4324 | 1554.8492 | 1555.6738 | 530.1            | 2      | 3.12  | 1.17        | RNDDFPEPSGYMK | LYT   | rep1      |

|           |           |           |         |   |      |      |                                 |     |      |
|-----------|-----------|-----------|---------|---|------|------|---------------------------------|-----|------|
| 778.6319  | 1555.2481 | 1555.6738 | 273.67  | 2 | 3.08 | 0.85 | RNDDFPEPSGYMK                   | LYK | rep1 |
| 1143.4564 | 3427.3458 | 3428.6157 | 370.39  | 3 | 6.91 | 4.24 | SENHVFADAIGHHIQNVVVHEGEHDSHGSIR | LYK | rep3 |
| 1143.5712 | 3427.69   | 3428.6157 | 269.99  | 3 | 5.85 | 3.87 | SENHVFADAIGHHIQNVVVHEGEHDSHGSIR | LYT | rep3 |
| 632.6192  | 1263.2227 | 1262.3291 | 707.9   | 2 | 1.83 | 0.27 | SWDYTYDGKK                      | LYK | rep1 |
| 422.0433  | 1263.1063 | 1262.3291 | 615.73  | 3 | 1.69 | 0.35 | SWDYTYDGKK                      | LYT | rep3 |
| 693.8006  | 1385.5855 | 1383.6356 | 1409.24 | 2 | 2.32 | 0.92 | VFDIIYEFIPK                     | LYK | rep3 |

**Matching Genes:**

[NP\\_194098.1](#) (major latex protein-related / MLP-related [Arabidopsis thaliana])

**Protein Group 52**

**Expression Quality:**

| Group                 | Group Probability | Num Peptides | % Seq Coverage | Num Spectra |
|-----------------------|-------------------|--------------|----------------|-------------|
| Total (Non-Redundant) | 1                 | 6            | 29.49          | 29.0        |

**Peptides:**

| Observed  | Mr(expt)  | Mr(calc)  | Mass Error (ppm) | Charge | Score | Score Delta | Peptide                          | Group | Replicate |
|-----------|-----------|-----------|------------------|--------|-------|-------------|----------------------------------|-------|-----------|
| 481.132   | 960.2483  | 960.0455  | 211.31           | 2      | 1.48  | 0.32        | DIVDAHYPK                        | LYK   | rep1      |
| 480.881   | 959.7463  | 960.0455  | 311.66           | 2      | 1.44  | 0.19        | DIVDAHYPK                        | LYT   | rep3      |
| 1139.7389 | 3416.1932 | 3416.803  | 178.46           | 3      | 4.28  | 1.63        | HAAAEIFANPDVIAEVPWYGIEQEYTLQK    | LYK   | rep2      |
| 543.1937  | 1626.5577 | 1626.6919 | 82.49            | 3      | 3.41  | 1.35        | HKEHISAYGEGNER                   | LYK   | rep3      |
| 1114.6171 | 3340.8277 | 3342.6824 | 554.84           | 3      | 4.12  | 2           | ITEIAGVVVSFDPKPIPGDWNGAGAHTNYSTK | LYT   | rep3      |
| 1126.5791 | 2251.1426 | 2252.4541 | 582.24           | 2      | 5.1   | 2.99        | LTGHHETADINTFLWGVANR             | LYK   | rep3      |
| 751.6394  | 2251.8947 | 2252.4541 | 248.33           | 3      | 3.91  | 1.75        | LTGHHETADINTFLWGVANR             | LYT   | rep1      |
| 804.2198  | 2409.6361 | 2408.6404 | 413.39           | 3      | 5.25  | 2.44        | RLTGHHETADINTFLWGVANR            | LYT   | rep3      |
| 803.6918  | 2408.0518 | 2408.6404 | 244.34           | 3      | 4.13  | 1.92        | RLTGHHETADINTFLWGVANR            | LYK   | rep1      |

**Matching Genes:**

[NP\\_176794.1](#) (ATGSR2 (Arabidopsis thaliana glutamine synthase clone R2); glutamate-ammonia ligase)

### Protein Group 53

#### Expression Quality:

| Group                 | Group Probability | Num Peptides | % Seq Coverage | Num Spectra |
|-----------------------|-------------------|--------------|----------------|-------------|
| Total (Non-Redundant) | 1                 | 9            | 24.88          | 36.0        |

#### Peptides:

| Observed  | Mr(expt)  | Mr(calc)  | Mass Error (ppm) | Charge | Score | Score Delta | Peptide                          | Group | Replicate |
|-----------|-----------|-----------|------------------|--------|-------|-------------|----------------------------------|-------|-----------|
| 1032.698  | 2063.3804 | 2064.176  | 385.44           | 2      | 2.38  | 0.4         | APTNDRFDDLFFYGIDSA               | LYT   | rep2      |
| 996.708   | 1991.4004 | 1992.1577 | 380.13           | 2      | 3.36  | 1.92        | FEYVNGSQVVVGDEHGKK               | LYT   | rep2      |
| 996.5525  | 1991.0894 | 1992.1577 | 536.26           | 2      | 3.22  | 1.72        | FEYVNGSQVVVGDEHGKK               | LYK   | rep2      |
| 639.7741  | 1277.5325 | 1278.418  | 692.61           | 2      | 2.1   | 0.71        | HLVYFDIESR                       | LYT   | rep2      |
| 1090.4913 | 3268.4505 | 3267.7034 | 228.65           | 3      | 2.86  | 0.96        | IVGFYGFAGNNLHSLGAYFAPLTNVTPLNAK  | LYK   | rep1      |
| 776.5347  | 1551.0537 | 1551.6169 | 362.97           | 2      | 2.52  | 1.12        | LDKFGGEEETPSSR                   | LYK   | rep1      |
| 518.2197  | 1551.6357 | 1551.6169 | 12.1             | 3      | 2.39  | 0.52        | LDKFGGEEETPSSR                   | LYT   | rep2      |
| 762.021   | 1522.0264 | 1522.7049 | 445.62           | 2      | 2.42  | 0.84        | LNTLDSYNIVDKK                    | LYT   | rep1      |
| 508.7598  | 1523.2558 | 1522.7049 | 361.77           | 3      | 1.99  | 0.49        | LNTLDSYNIVDKK                    | LYK   | rep2      |
| 837.6578  | 2509.95   | 2508.707  | 495.48           | 3      | 2.88  | 1.24        | SFEADPFVINHPEEHLVSVEGR           | LYK   | rep2      |
| 836.9237  | 2507.7476 | 2508.707  | 382.42           | 3      | 1.66  | 0.44        | SFEADPFVINHPEEHLVSVEGR           | LYT   | rep1      |
| 545.9337  | 1634.7777 | 1634.7759 | 1.08             | 3      | 2.8   | 1.15        | WFHCSTPGDSLTAAR : +57.05000 (C4) | LYT   | rep3      |
| 545.8763  | 1634.6056 | 1634.7759 | 104.2            | 3      | 2.38  | 0.63        | WFHCSTPGDSLTAAR : +57.05000 (C4) | LYK   | rep1      |
| 564.9771  | 1691.9077 | 1691.8486 | 34.91            | 3      | 2.22  | 0.47        | WTQVETFGVRPSEK                   | LYK   | rep1      |
| 846.7283  | 1691.441  | 1691.8486 | 240.96           | 2      | 2.2   | 0.39        | WTQVETFGVRPSEK                   | LYT   | rep3      |

**Matching Genes:**

[NP\\_188262.1](#) (jacalin lectin family protein [Arabidopsis thaliana])

---

**Protein Group 54**

**Expression Quality:**

| Group                 | Group Probability | Num Peptides | % Seq Coverage | Num Spectra |
|-----------------------|-------------------|--------------|----------------|-------------|
| Total (Non-Redundant) | 1                 | 5            | 27.98          | 26.0        |

**Peptides:**

| Observed  | Mr(expt)  | Mr(calc)  | Mass Error (ppm) | Charge | Score | Score Delta | Peptide                                                                      | Group | Replicate |
|-----------|-----------|-----------|------------------|--------|-------|-------------|------------------------------------------------------------------------------|-------|-----------|
| 412.9845  | 1235.93   | 1236.3843 | 367.4            | 3      | 2.28  | 0.86        | FHGHSAPVVTGK                                                                 | LYK   | rep3      |
| 1101.6267 | 2201.2378 | 2202.4812 | 564.53           | 2      | 4.99  | 3.09        | FHGHSAPVVTGKPIDLGGSLGR                                                       | LYK   | rep3      |
| 735.1243  | 2202.3493 | 2202.4812 | 59.87            | 3      | 4.22  | 2.1         | FHGHSAPVVTGKPIDLGGSLGR                                                       | LYT   | rep2      |
| 1471.6869 | 4412.0372 | 4411.8773 | 36.24            | 3      | 3.94  | 2.36        | HKDATGSLNDFNGGDAMNSDELLIHECDVLIPCALGGVLNK : +57.05000 (C27); +57.05000 (C33) | LYT   | rep1      |
| 1471.5551 | 4411.6417 | 4411.8773 | 53.4             | 3      | 2.37  | 0.64        | HKDATGSLNDFNGGDAMNSDELLIHECDVLIPCALGGVLNK : +57.05000 (C27); +57.05000 (C33) | LYK   | rep1      |
| 1185.7631 | 3554.2657 | 3553.9863 | 78.61            | 3      | 7.18  | 0.91        | IHDLIGIHTDVPAPDMGTNAQTMAWILDEYSK                                             | LYT   | rep1      |
| 1185.3639 | 3553.0682 | 3553.9863 | 258.33           | 3      | 6.14  | 1.82        | IHDLIGIHTDVPAPDMGTNAQTMAWILDEYSK                                             | LYK   | rep2      |
| 786.816   | 2357.4246 | 2356.6191 | 341.81           | 3      | 4.4   | 2.45        | YHPEVDPDEVNALAQLMTWK                                                         | LYT   | rep1      |

|          |          |           |        |   |      |      |                      |     |      |
|----------|----------|-----------|--------|---|------|------|----------------------|-----|------|
| 787.0388 | 2358.093 | 2356.6191 | 625.41 | 3 | 2.12 | 0.87 | YHPEVDPDEVNALAQLMTWK | LYK | rep1 |
|----------|----------|-----------|--------|---|------|------|----------------------|-----|------|

**Matching Genes:**

[NP\\_196361.1](#) (GDH2 (GLUTAMATE DEHYDROGENASE 2); oxidoreductase [Arabidopsis thaliana])

**Protein Group 55**

**Expression Quality:**

| Group                 | Group Probability | Num Peptides | % Seq Coverage | Num Spectra |
|-----------------------|-------------------|--------------|----------------|-------------|
| Total (Non-Redundant) | 1                 | 7            | 11.87          | 24.0        |

**Peptides:**

| Observed  | Mr(expt)  | Mr(calc)  | Mass Error (ppm) | Charge | Score | Score Delta | Peptide                         | Group | Replicate |
|-----------|-----------|-----------|------------------|--------|-------|-------------|---------------------------------|-------|-----------|
| 661.1839  | 1320.3521 | 1320.4548 | 77.8             | 2      | 2.28  | 0.99        | HFSVEGQLEFK                     | LYT   | rep2      |
| 661.1051  | 1320.1946 | 1320.4548 | 197.06           | 2      | 2.02  | 0.88        | HFSVEGQLEFK                     | LYK   | rep2      |
| 925.2707  | 1848.5257 | 1849.098  | 309.52           | 2      | 3.8   | 2.02        | HSEFISYPISLWIEK                 | LYT   | rep3      |
| 925.2107  | 1848.4058 | 1849.098  | 374.35           | 2      | 3.36  | 1.51        | HSEFISYPISLWIEK                 | LYK   | rep2      |
| 799.1385  | 1596.2613 | 1596.7888 | 330.38           | 2      | 4.4   | 1.93        | IKEVSHEWDLVNK                   | LYT   | rep1      |
| 660.2267  | 1977.6566 | 1977.271  | 195.01           | 3      | 2.74  | 0.87        | KHSEFISYPISLWIEK                | LYT   | rep2      |
| 989.4375  | 1976.8594 | 1977.271  | 208.15           | 2      | 2.57  | 1.27        | KHSEFISYPISLWIEK                | LYK   | rep1      |
| 1132.6903 | 3395.0474 | 3395.8916 | 248.58           | 3      | 2.66  | 1.25        | LDGQPELFIHIIPDKTNNTLTIIDSGIGMTK | LYK   | rep1      |
| 1132.6981 | 3395.0709 | 3395.8916 | 241.68           | 3      | 1.42  | 0.29        | LDGQPELFIHIIPDKTNNTLTIIDSGIGMTK | LYT   | rep1      |
| 606.8289  | 1211.6421 | 1209.3556 | 1890.71          | 2      | 2.33  | 0.62        | RAPFDLFDTK                      | LYT   | rep3      |
| 605.5838  | 1209.1519 | 1209.3556 | 168.43           | 2      | 1.91  | 0.55        | RAPFDLFDTK                      | LYK   | rep2      |
| 651.3446  | 1951.0103 | 1950.2471 | 391.38           | 3      | 4.08  | 2.41        | SKLDGQPELFIHIIPDK               | LYK   | rep2      |
| 650.8898  | 1949.6458 | 1950.2471 | 308.28           | 3      | 3.71  | 2.07        | SKLDGQPELFIHIIPDK               | LYT   | rep3      |

**Matching Genes:**

[NP\\_200412.1](#) (HSP81-3 (Heat shock protein 81-3); ATP binding [Arabidopsis thaliana])

---

**Protein Group 56****Expression Quality:**

| Group                 | Group Probability | Num Peptides | % Seq Coverage | Num Spectra |
|-----------------------|-------------------|--------------|----------------|-------------|
| Total (Non-Redundant) | 1                 | 6            | 27.54          | 43.0        |

**Peptides:**

| Observed  | Mr(expt)  | Mr(calc)  | Mass Error (ppm) | Charge | Score | Score Delta | Peptide               | Group | Replicate |
|-----------|-----------|-----------|------------------|--------|-------|-------------|-----------------------|-------|-----------|
| 728.0441  | 2181.1087 | 2181.5068 | 182.49           | 3      | 4.35  | 1.33        | AKLNNHGTGLGALLQHEVLPR | LYT   | rep2      |
| 775.4502  | 1548.8848 | 1549.6938 | 522.06           | 2      | 3.77  | 1.59        | ASYLHHFDEFKR          | LYT   | rep2      |
| 517.491   | 1549.4494 | 1549.6938 | 157.72           | 3      | 3.56  | 1.62        | ASYLHHFDEFKR          | LYK   | rep3      |
| 567.185   | 1132.3543 | 1132.3143 | 35.29            | 2      | 2.26  | 0.76        | GPGLFTDIGKK           | LYK   | rep2      |
| 723.0677  | 1444.1197 | 1444.5975 | 330.79           | 2      | 4.06  | 2.21        | KGGVHAADVATQYK        | LYT   | rep3      |
| 482.5144  | 1444.5197 | 1444.5975 | 53.85            | 3      | 3.23  | 1.54        | KGGVHAADVATQYK        | LYK   | rep2      |
| 1043.3899 | 2084.7642 | 2085.3279 | 270.3            | 2      | 3.18  | 1.81        | LEVQYFHDHATVTAAAALK   | LYT   | rep3      |
| 696.1222  | 2085.3431 | 2085.3279 | 7.3              | 3      | 2.41  | 0.73        | LEVQYFHDHATVTAAAALK   | LYK   | rep2      |
| 991.7688  | 1981.522  | 1982.2556 | 370.08           | 2      | 4.57  | 2.65        | LNNHGTGLGALLQHEVLPR   | LYT   | rep1      |
| 991.6654  | 1981.3152 | 1982.2556 | 474.4            | 2      | 4.41  | 2.72        | LNNHGTGLGALLQHEVLPR   | LYK   | rep3      |

**Matching Genes:**

[NP\\_201551.1](#) (porin, putative [Arabidopsis thaliana])

---

**Protein Group 57****Expression Quality:**

| Group                 | Group Probability | Num Peptides | % Seq Coverage | Num Spectra |
|-----------------------|-------------------|--------------|----------------|-------------|
| Total (Non-Redundant) | 1                 | 7            | 34.46          | 48.0        |



**Peptides:**

| Observed  | Mr(expt)  | Mr(calc)  | Mass Error (ppm) | Charge | Score | Score Delta | Peptide                              | Group | Replicate |
|-----------|-----------|-----------|------------------|--------|-------|-------------|--------------------------------------|-------|-----------|
| 683.482   | 1364.9483 | 1365.5021 | 405.55           | 2      | 2.13  | 0.57        | EEGHKIVGFHGR                         | LYK   | rep3      |
| 683.594   | 1365.1724 | 1365.5021 | 241.42           | 2      | 1.87  | 0.53        | EEGHKIVGFHGR                         | LYT   | rep1      |
| 651.2762  | 1950.8053 | 1951.0593 | 130.21           | 3      | 4.16  | 1.67        | FVYDKSPEEVTGEEHGK                    | LYK   | rep1      |
| 651.2545  | 1950.7401 | 1951.0593 | 163.62           | 3      | 3.85  | 1.68        | FVYDKSPEEVTGEEHGK                    | LYT   | rep3      |
| 1325.4064 | 3973.1956 | 3972.4763 | 181.08           | 3      | 4.17  | 2.35        | GSTIPTDPFVINHPPEEHLVSIEIWYKPDGLIQGLR | LYK   | rep3      |
| 1324.7335 | 3971.1771 | 3972.4763 | 327.06           | 3      | 3.65  | 1.97        | GSTIPTDPFVINHPPEEHLVSIEIWYKPDGLIQGLR | LYT   | rep3      |
| 698.8286  | 1395.6416 | 1395.6299 | 8.43             | 2      | 2.38  | 0.26        | IFGSDGSVITMLR                        | LYK   | rep2      |
| 539.5023  | 1076.989  | 1077.2419 | 234.75           | 2      | 1.56  | 0.54        | IGVHVRPVSN                           | LYT   | rep3      |
| 538.9649  | 1075.9141 | 1077.2419 | 1232.62          | 2      | 1.55  | 0.25        | IGVHVRPVSN                           | LYK   | rep3      |
| 782.1143  | 1562.2129 | 1562.7723 | 357.95           | 2      | 4.31  | 1.65        | KVYVGQAQDGISAVK                      | LYK   | rep3      |
| 782.1397  | 1562.2637 | 1562.7723 | 325.46           | 2      | 4.26  | 1.97        | KVYVGQAQDGISAVK                      | LYT   | rep1      |
| 718.7205  | 1435.4253 | 1434.5994 | 575.75           | 2      | 3.46  | 1.38        | VYVGQAQDGISAVK                       | LYT   | rep3      |
| 718.1001  | 1434.1846 | 1434.5994 | 289.1            | 2      | 1.45  | 0.3         | VYVGQAQDGISAVK                       | LYK   | rep2      |

**Matching Genes:**

[NP\\_188264.1](#) (jacalin lectin family protein [Arabidopsis thaliana])

**Protein Group 58****Expression Quality:**

| Group                 | Group Probability | Num Peptides | % Seq Coverage | Num Spectra |
|-----------------------|-------------------|--------------|----------------|-------------|
| Total (Non-Redundant) | 1                 | 6            | 18.93          | 40.0        |

**Peptides:**

| Observed | Mr(expt) | Mr(calc)  | Mass Error (ppm) | Charge | Score | Score Delta | Peptide       | Group | Replicate |
|----------|----------|-----------|------------------|--------|-------|-------------|---------------|-------|-----------|
| 762.6133 | 1523.211 | 1523.7214 | 335              | 2      | 3.55  | 1.56        | ALLHSSHMYHEAK | LYT   | rep1      |

|           |           |           |        |   |      |      |                                  |     |      |
|-----------|-----------|-----------|--------|---|------|------|----------------------------------|-----|------|
| 762.4065  | 1522.7974 | 1523.7214 | 606.43 | 2 | 3.5  | 1.55 | ALLHSSSHMYHEAK                   | LYK | rep2 |
| 442.9578  | 1325.8498 | 1324.5314 | 995.41 | 3 | 2.68 | 0.89 | GKHIIIVATGSDVK                   | LYK | rep3 |
| 442.7521  | 1325.2329 | 1324.5314 | 529.68 | 3 | 2.35 | 0.63 | GKHIIIVATGSDVK                   | LYT | rep1 |
| 873.0405  | 2616.0981 | 2616.8887 | 302.1  | 3 | 4.49 | 2.58 | HGHVDYDKVPGVVYTYPEVASVGK         | LYT | rep2 |
| 872.8621  | 2615.5627 | 2616.8887 | 506.69 | 3 | 4.24 | 2.29 | HGHVDYDKVPGVVYTYPEVASVGK         | LYK | rep2 |
| 570.5539  | 1139.0921 | 1139.3069 | 188.53 | 2 | 2.32 | 0.64 | HIIVATGSDVK                      | LYK | rep2 |
| 570.7027  | 1139.3897 | 1139.3069 | 72.69  | 2 | 1.96 | 0.53 | HIIVATGSDVK                      | LYT | rep3 |
| 1174.6688 | 3520.983  | 3519.9497 | 293.55 | 3 | 5.86 | 3.4  | ILGVHIMSPNAGELIHEAVLAINYDASSEDAR | LYT | rep1 |
| 1174.0533 | 3519.1366 | 3519.9497 | 231.01 | 3 | 3.93 | 2.06 | ILGVHIMSPNAGELIHEAVLAINYDASSEDAR | LYK | rep2 |
| 741.0751  | 1480.1346 | 1480.7168 | 393.19 | 2 | 3.27 | 0    | VCHAHPTMSEAIK : +57.05000 (C2)   | LYK | rep3 |
| 494.5421  | 1480.6029 | 1480.7168 | 76.92  | 3 | 2.9  | 0    | VCHAHPTMSEAIK : +57.05000 (C2)   | LYT | rep1 |

**Matching Genes:**

[NP\\_566570.3](#) (LPD2 (LIPOAMIDE DEHYDROGENASE 2); FAD binding / dihydrolipoyl dehydrogenase/ disulfide oxidoreductase/ oxidoreductase [Arabidopsis thaliana])

**Protein Group 59**

**Expression Quality:**

| Group                 | Group Probability | Num Peptides | % Seq Coverage | Num Spectra |
|-----------------------|-------------------|--------------|----------------|-------------|
| Total (Non-Redundant) | 1                 | 7            | 36.31          | 41.0        |

**Peptides:**

| Observed | Mr(expt)  | Mr(calcd) | Mass Error (ppm) | Charge | Score | Score Delta | Peptide                                       | Group | Replicate |
|----------|-----------|-----------|------------------|--------|-------|-------------|-----------------------------------------------|-------|-----------|
| 949.3625 | 2845.0642 | 2845.2444 | 63.33            | 3      | 3.98  | 1.84        | ALSDHHVLLLEGTLKPNMVTPGSESAK                   | LYT   | rep1      |
| 960.3762 | 2878.1052 | 2877.2444 | 299.16           | 3      | 2.74  | 0.38        | ALSDHHVLLLEGTLKPNMVTPGSESAK : +32.00000 (M18) | LYK   | rep3      |
| 745.5463 | 1489.0769 | 1488.6485 | 287.77           | 2      | 3.42  | 1.57        | GILAADESTGTIGKR                               | LYT   | rep1      |
| 745.0983 | 1488.1809 | 1488.6485 | 314.11           | 2      | 2.99  | 1.08        | GILAADESTGTIGKR                               | LYK   | rep1      |
| 438.3591 | 1312.0537 | 1311.4928 | 427.72           | 3      | 3.78  | 1.43        | KPWLSFSFGR                                    | LYT   | rep3      |

|           |           |           |        |   |      |      |                                               |     |      |
|-----------|-----------|-----------|--------|---|------|------|-----------------------------------------------|-----|------|
| 438.5678  | 1312.68   | 1311.4928 | 905.2  | 3 | 3.18 | 1.13 | KPWSLSFSFGR                                   | LYK | rep2 |
| 1165.3269 | 2328.6382 | 2329.5718 | 400.74 | 2 | 2.61 | 1.04 | TVPAAVPAIVFLSGGQSEEEATR                       | LYT | rep2 |
| 869.8262  | 2606.455  | 2604.7466 | 655.91 | 3 | 1.87 | 0.16 | VDKGTVELAGTNGETTTQGLDGLGDR                    | LYK | rep3 |
| 1045.8964 | 3134.6656 | 3136.5436 | 598.73 | 3 | 3.54 | 1.31 | YAVICQENGLVPIVEPEILVDGSHDIQK : +57.05000 (C5) | LYK | rep3 |
| 1046.0453 | 3135.1124 | 3136.5436 | 456.29 | 3 | 2.72 | 1.43 | YAVICQENGLVPIVEPEILVDGSHDIQK : +57.05000 (C5) | LYT | rep1 |

**Matching Genes:**

[NP\\_181187.1](#) (fructose-bisphosphate aldolase, putative [Arabidopsis thaliana])

**Protein Group 60**

**Expression Quality:**

| Group                 | Group Probability | Num Peptides | % Seq Coverage | Num Spectra |
|-----------------------|-------------------|--------------|----------------|-------------|
| Total (Non-Redundant) | 1                 | 7            | 13.72          | 26.0        |

**Peptides:**

| Observed  | Mr(expt)  | Mr(calcd) | Mass Error (ppm) | Charge | Score | Score Delta | Peptide                                          | Group | Replicate |
|-----------|-----------|-----------|------------------|--------|-------|-------------|--------------------------------------------------|-------|-----------|
| 1083.1534 | 3246.4369 | 3247.6477 | 372.84           | 3      | 2.68  | 0.82        | AGLPLQDLEFVQFHPTGIYGAGCLITEGSR : +57.05000 (C23) | LYT   | rep1      |
| 1083.2611 | 3246.7598 | 3247.6477 | 273.38           | 3      | 1.89  | 0.4         | AGLPLQDLEFVQFHPTGIYGAGCLITEGSR : +57.05000 (C23) | LYK   | rep1      |
| 647.111   | 1938.3094 | 1938.2412 | 35.19            | 3      | 2.14  | 0.65        | DHIYLHLNHLPPPEVLK                                | LYK   | rep2      |
| 647.2245  | 1938.65   | 1938.2412 | 210.91           | 3      | 1.24  | 0.24        | DHIYLHLNHLPPPEVLK                                | LYT   | rep3      |
| 838.7821  | 2513.3228 | 2513.9043 | 231.29           | 3      | 5.09  | 2.93        | GVGPHKDHIYLHLNHLPPPEVLK                          | LYK   | rep3      |
| 839.2942  | 2514.8591 | 2513.9043 | 379.81           | 3      | 4.03  | 1.79        | GVGPHKDHIYLHLNHLPPPEVLK                          | LYT   | rep2      |
| 63 9.3941 | 1276.7725 | 1277.3437 | 447.21           | 2      | 2.5   | 1.16        | HTLGYWEDEK                                       | LYT   | rep1      |
| 512.0315  | 1533.071  | 1532.6616 | 267.12           | 3      | 3.62  | 1.51        | HTLGYWEDEKVR                                     | LYT   | rep2      |
| 821.2362  | 1640.4568 | 1640.9114 | 277.01           | 2      | 4.26  | 2.64        | TGHALLHTLYGQAMK                                  | LYK   | rep2      |
| 821.1858  | 1640.356  | 1640.9114 | 338.45           | 2      | 4.23  | 2.57        | TGHALLHTLYGQAMK                                  | LYT   | rep3      |
| 540.5086  | 1079.0015 | 1079.2335 | 214.97           | 2      | 1.56  | 0.41        | WHMYDTVK                                         | LYK   | rep2      |

**Matching Genes:**[NP\\_201477.1](#) (SDH1-1 (Succinate dehydrogenase 1-1) [Arabidopsis thaliana])**Protein Group 61****Expression Quality:**

| Group                 | Group Probability | Num Peptides | % Seq Coverage | Num Spectra |
|-----------------------|-------------------|--------------|----------------|-------------|
| Total (Non-Redundant) | 1                 | 7            | 23.15          | 39.0        |

**Peptides:**

| Observed  | Mr(expt)  | Mr(calc)  | Mass Error (ppm) | Charge | Score | Score Delta | Peptide                                              | Group | Replicate |
|-----------|-----------|-----------|------------------|--------|-------|-------------|------------------------------------------------------|-------|-----------|
| 1264.3015 | 2526.5874 | 2526.8486 | 103.36           | 2      | 2.78  | 1.19        | ESSIPLITVFDKDPNNHPYVIK                               | LYT   | rep2      |
| 1443.6166 | 4327.8263 | 4328.7607 | 215.88           | 3      | 4.41  | 2.34        | GQGLSFLLGDAENSQGAFQYFGLLEESQVPLIIIQTADDKK            | LYT   | rep1      |
| 1443.1818 | 4326.5218 | 4328.7607 | 517.22           | 3      | 2.98  | 1.17        | GQGLSFLLGDAENSQGAFQYFGLLEESQVPLIIIQTADDKK            | LYK   | rep3      |
| 722.8788  | 2165.6129 | 2165.4586 | 71.24            | 3      | 4.25  | 2.2         | HDFIVVEFYAPWCGHCK : +57.05000 (C13); +57.05000 (C16) | LYT   | rep3      |
| 722.871   | 2165.5894 | 2165.4586 | 60.41            | 3      | 2.31  | 0.69        | HDFIVVEFYAPWCGHCK : +57.05000 (C13); +57.05000 (C16) | LYK   | rep2      |
| 543.7386  | 1085.4615 | 1085.3871 | 68.54            | 2      | 2.46  | 1.02        | KVVVVGIFPK                                           | LYT   | rep1      |
| 534.9871  | 1601.9377 | 1599.7878 | 1343.85          | 3      | 3.01  | 1.25        | LFKPFDEQFVDSK                                        | LYK   | rep2      |
| 800.5995  | 1599.1834 | 1599.7878 | 377.83           | 2      | 2.47  | 0.67        | LFKPFDEQFVDSK                                        | LYT   | rep1      |
| 795.5784  | 1589.1411 | 1589.7115 | 358.8            | 2      | 3.2   | 1.72        | LRSELDFAHTSDAK                                       | LYK   | rep1      |
| 795.593   | 1589.1704 | 1589.7115 | 340.37           | 2      | 2.41  | 1.15        | LRSELDFAHTSDAK                                       | LYT   | rep3      |

|          |           |           |        |   |      |      |              |     |      |
|----------|-----------|-----------|--------|---|------|------|--------------|-----|------|
| 661.2603 | 1320.5049 | 1320.3669 | 104.51 | 2 | 1.62 | 0.25 | SELDFAHTSDAK | LYT | rep1 |
|----------|-----------|-----------|--------|---|------|------|--------------|-----|------|

**Matching Genes :**

[NP\\_173594.1](#) (ATPDIL1-1 (PDI-LIKE 1-1); protein disulfide isomerase [Arabidopsis thaliana])

**Protein Group 62**

**Expression Quality:**

| Group                 | Group Probability | Num Peptides | % Seq Coverage | Num Spectra |
|-----------------------|-------------------|--------------|----------------|-------------|
| Total (Non-Redundant) | 1                 | 7            | 24.11          | 41.0        |

**Peptides:**

| Observed  | Mr(expt)  | Mr(calc)  | Mass Error (ppm) | Charge | Score | Score Delta | Peptide                       | Group | Replicate |
|-----------|-----------|-----------|------------------|--------|-------|-------------|-------------------------------|-------|-----------|
| 706.7616  | 2117.2613 | 2117.2388 | 10.65            | 3      | 2.45  | 0.99        | ALEEEIEDIGGHLNAYTSR           | LYK   | rep2      |
| 706.8041  | 2117.3888 | 2117.2388 | 70.85            | 3      | 1.9   | 0.25        | ALEEEIEDIGGHLNAYTSR           | LYT   | rep2      |
| 1105.6615 | 3313.961  | 3314.6077 | 195.09           | 3      | 3.93  | 2.38        | EMQEVEGQTDEVVLDHLHATAFQYTPLGR | LYT   | rep1      |
| 1105.7982 | 3314.3712 | 3314.6077 | 71.34            | 3      | 3.81  | 1.83        | EMQEVEGQTDEVVLDHLHATAFQYTPLGR | LYK   | rep2      |
| 1127.4505 | 2252.8853 | 2253.4558 | 253.17           | 2      | 4.13  | 2.43        | FESDETNGTAHFLEHMIFK           | LYK   | rep1      |
| 1127.9163 | 2253.8169 | 2253.4558 | 160.26           | 2      | 3.1   | 1.79        | FESDETNGTAHFLEHMIFK           | LYT   | rep3      |
| 392.4537  | 1174.3375 | 1174.3096 | 23.83            | 3      | 1.58  | 0.18        | IDAVDASTVKR                   | LYK   | rep2      |
| 392.7632  | 1175.2663 | 1174.3096 | 814.69           | 3      | 1.36  | 0.33        | IDAVDASTVKR                   | LYT   | rep2      |
| 588.7635  | 1175.5113 | 1173.3696 | 1825.21          | 2      | 2.55  | 0.85        | RIPTAELFAR                    | LYK   | rep3      |
| 587.6647  | 1173.3138 | 1173.3696 | 47.61            | 2      | 2.45  | 0.79        | RIPTAELFAR                    | LYT   | rep3      |
| 671.7792  | 2012.314  | 2012.2539 | 29.89            | 3      | 1.68  | 0.48        | SSLLLHMDGTSPIAEDIGR           | LYK   | rep2      |

|           |           |           |        |   |      |      |                      |     |      |
|-----------|-----------|-----------|--------|---|------|------|----------------------|-----|------|
| 1156.6101 | 2311.2046 | 2311.5647 | 155.76 | 2 | 4.91 | 3.39 | YASHPILASHNHILSAPETR | LYK | rep3 |
| 1156.3011 | 2310.5865 | 2311.5647 | 423.19 | 2 | 4.51 | 3.03 | YASHPILASHNHILSAPETR | LYT | rep2 |

**Matching Genes:**

[NP\\_186858.1](#) (MPPBETA; metalloendopeptidase [Arabidopsis thaliana])

---

**Protein Group 63**

**Expression Quality:**

| Group                 | Group Probability | Num Peptides | % Seq Coverage | Num Spectra |
|-----------------------|-------------------|--------------|----------------|-------------|
| Total (Non-Redundant) | 1                 | 6            | 18.93          | 37.0        |

**Peptides:**

| Observed  | Mr(expt)  | Mr(calc)  | Mass Error (ppm) | Charge | Score | Score Delta | Peptide                          | Group | Replicate |
|-----------|-----------|-----------|------------------|--------|-------|-------------|----------------------------------|-------|-----------|
| 762.6133  | 1523.211  | 1523.7214 | 335              | 2      | 3.55  | 1.56        | ALLHSSHMYHEAK                    | LYT   | rep1      |
| 762.4065  | 1522.7974 | 1523.7214 | 606.43           | 2      | 3.5   | 1.55        | ALLHSSHMYHEAK                    | LYK   | rep2      |
| 442.9578  | 1325.8498 | 1324.5314 | 995.41           | 3      | 2.68  | 0.89        | GKHIIVATGSDVK                    | LYK   | rep3      |
| 442.7521  | 1325.2329 | 1324.5314 | 529.68           | 3      | 2.35  | 0.63        | GKHIIVATGSDVK                    | LYT   | rep1      |
| 864.2358  | 2589.684  | 2590.8545 | 451.76           | 3      | 6.05  | 3.52        | HGHVDYDKVPGVVYTHPEVASVGK         | LYK   | rep3      |
| 864.2925  | 2589.854  | 2590.8545 | 386.17           | 3      | 5.3   | 3.27        | HGHVDYDKVPGVVYTHPEVASVGK         | LYT   | rep3      |
| 570.5539  | 1139.0921 | 1139.3069 | 188.53           | 2      | 2.32  | 0.64        | HIIIVATGSDVK                     | LYK   | rep2      |
| 570.7027  | 1139.3897 | 1139.3069 | 72.69            | 2      | 1.96  | 0.53        | HIIIVATGSDVK                     | LYT   | rep3      |
| 1169.1449 | 3504.4112 | 3503.9502 | 131.58           | 3      | 2.53  | 1           | ILGVHIMAPNAGELIHEAVLAINYDASSEDIA | LYT   | rep1      |
| 1168.5638 | 3502.6681 | 3503.9502 | 365.91           | 3      | 1.42  | 0.07        | ILGVHIMAPNAGELIHEAVLAINYDASSEDIA | LYK   | rep2      |

|          |           |           |        |   |      |   |                                |     |      |
|----------|-----------|-----------|--------|---|------|---|--------------------------------|-----|------|
| 494.4634 | 1480.3668 | 1480.7168 | 236.31 | 3 | 2.99 | 0 | VCHAHPTMSEALK : +57.05000 (C2) | LYT | rep2 |
| 494.7794 | 1481.3146 | 1480.7168 | 403.75 | 3 | 2.72 | 0 | VCHAHPTMSEALK : +57.05000 (C2) | LYK | rep1 |

**Matching Genes:**

[NP\\_175237.1](#) (dihydrolipoamide dehydrogenase 1, mitochondrial / lipoamide dehydrogenase 1 (MTLPD1) [Arabidopsis thaliana])

**Protein Group 64**

**Expression Quality:**

| Group                 | Group Probability | Num Peptides | % Seq Coverage | Num Spectra |
|-----------------------|-------------------|--------------|----------------|-------------|
| Total (Non-Redundant) | 1                 | 6            | 18.91          | 20.0        |

**Peptides:**

| Observed  | Mr(expt)  | Mr(calc)  | Mass Error (ppm) | Charge | Score | Score Delta | Peptide                          | Group | Replicate |
|-----------|-----------|-----------|------------------|--------|-------|-------------|----------------------------------|-------|-----------|
| 729.1424  | 1456.2691 | 1457.5068 | 849.22           | 2      | 1.39  | 0.44        | DVHDHIEYGTSGK                    | LYT   | rep1      |
| 1175.991  | 2349.9663 | 2350.7222 | 321.52           | 2      | 4.08  | 1.96        | FLGPSLFHYYQKPLNIVEGK             | LYK   | rep3      |
| 1176.1131 | 2350.2105 | 2350.7222 | 217.67           | 2      | 3.43  | 1.68        | FLGPSLFHYYQKPLNIVEGK             | LYT   | rep3      |
| 869.4672  | 2605.378  | 2604.9675 | 157.58           | 3      | 4.89  | 3.06        | LLQHATTIYLHHAIGDFAEALAAK         | LYT   | rep3      |
| 869.7934  | 2606.3567 | 2604.9675 | 533.29           | 3      | 3.65  | 1.87        | LLQHATTIYLHHAIGDFAEALAAK         | LYK   | rep1      |
| 555.4427  | 1663.3048 | 1663.8188 | 308.93           | 3      | 1.96  | 0.48        | QEHCAEVGSHLIQR : +57.05000 (C4)  | LYK   | rep2      |
| 607.974   | 1820.8985 | 1820.0051 | 490.87           | 3      | 5.16  | 2.28        | RQEHCAEVGSHLIQR : +57.05000 (C5) | LYK   | rep3      |
| 711.6002  | 2131.7772 | 2131.3584 | 196.49           | 3      | 2.55  | 0.55        | YPLPQGEIHHVVNPDPYR               | LYK   | rep3      |

**Matching Genes:**

[NP\\_568064.1](#) (AGT2 (ALANINE:GLYOXYLATE AMINOTRANSFERASE 2); alanine-glyoxylate transaminase [Arabidopsis thaliana])

**Protein Group 65**

**Expression Quality:**

| Group                 | Group Probability | Num Peptides | % Seq Coverage | Num Spectra |
|-----------------------|-------------------|--------------|----------------|-------------|
| Total (Non-Redundant) | 1                 | 7            | 16.93          | 13.0        |

**Peptides:**

| Observed  | Mr(expt)  | Mr(calc)  | Mass Error (ppm) | Charge | Score | Score Delta | Peptide                                                        | Group | Replicate |
|-----------|-----------|-----------|------------------|--------|-------|-------------|----------------------------------------------------------------|-------|-----------|
| 711.8185  | 2132.432  | 2132.456  | 11.29            | 3      | 2.31  | 0.32        | AHVIVMGATNRPNSIDPALR                                           | LYK   | rep2      |
| 711.8114  | 2132.4107 | 2132.456  | 21.25            | 3      | 2.23  | 0.68        | AHVIVMGATNRPNSIDPALR                                           | LYT   | rep3      |
| 1505.9667 | 4514.8765 | 4513.9028 | 215.72           | 3      | 3.51  | 1.44        | EKMDVIDLEDDSIDAEILNSMAVTNEHFHTALGNSNPSALR                      | LYT   | rep2      |
| 1505.3246 | 4512.9503 | 4513.9028 | 211.02           | 3      | 1.66  | 0.41        | EKMDVIDLEDDSIDAEILNSMAVTNEHFHTALGNSNPSALR                      | LYK   | rep1      |
| 609.5605  | 1825.6582 | 1825.9766 | 174.36           | 3      | 2.13  | 0.31        | ELQETVQYPVEHPEK                                                | LYT   | rep1      |
| 946.3816  | 2836.1213 | 2834.1989 | 678.28           | 3      | 3.47  | 1.31        | ISKDTHGYVGADLAALCTEAAALQCIR : +57.05000 (C17); +57.05000 (C24) | LYT   | rep1      |
| 474.4469  | 946.8782  | 947.1362  | 272.41           | 2      | 2.15  | 0.69        | KGDLFLVR                                                       | LYT   | rep2      |
| 474.5837  | 947.1518  | 947.1362  | 16.42            | 2      | 1.66  | 0.47        | KGDLFLVR                                                       | LYK   | rep2      |
| 785.0607  | 1568.1057 | 1568.7386 | 403.44           | 2      | 3.51  | 1.8         | KYQAFQAQTLQQSR                                                 | LYT   | rep1      |
| 785.553   | 1569.0904 | 1568.7386 | 224.21           | 2      | 2.55  | 1.28        | KYQAFQAQTLQQSR                                                 | LYK   | rep2      |
| 794.0554  | 1586.0952 | 1586.9451 | 535.5            | 2      | 2.81  | 0.87        | RIVSQLLTLM DGLK                                                | LYT   | rep1      |

**Matching Genes:**

[NP\\_187595.1](#) (CDC48 (CELL DIVISION CYCLE 48); ATPase [Arabidopsis thaliana])

**Protein Group 66**

**Expression Quality:**

| Group                 | Group Probability | Num Peptides | % Seq Coverage | Num Spectra |
|-----------------------|-------------------|--------------|----------------|-------------|
| Total (Non-Redundant) | 1                 | 7            | 31.78          | 13.0        |

**Peptides:**

| Observed | Mr(expt) | Mr(calc) | Mass Error (ppm) | Charge | Score | Score Delta | Peptide | Group | Replicate |
|----------|----------|----------|------------------|--------|-------|-------------|---------|-------|-----------|
|----------|----------|----------|------------------|--------|-------|-------------|---------|-------|-----------|



|           |           |           |        |   |      |      |                                           |     |      |
|-----------|-----------|-----------|--------|---|------|------|-------------------------------------------|-----|------|
| 1320.9483 | 2639.8809 | 2640.0068 | 47.7   | 2 | 3.67 | 2.05 | ADVYKPQLGYISTLNSYDLPILR                   | LYT | rep1 |
| 764.8832  | 2291.6261 | 2292.4734 | 369.61 | 3 | 3.02 | 1.09 | FNTLETTLTHSSGPASYGRPR                     | LYT | rep1 |
| 1154.792  | 2307.5684 | 2308.5608 | 429.87 | 2 | 1.46 | 0.41 | FQWVEFKTNANAQINTLAGR                      | LYK | rep1 |
| 750.8533  | 1499.691  | 1500.666  | 649.74 | 2 | 3.08 | 1.28 | IEVWDHHPQLR                               | LYT | rep1 |
| 1207.3692 | 2412.7227 | 2412.6738 | 20.26  | 2 | 3.12 | 1.28 | NPRPFYLAGNNPQGQVWLQGR                     | LYT | rep1 |
| 1207.3902 | 2412.7647 | 2412.6738 | 37.66  | 2 | 0.88 | 0.09 | NPRPFYLAGNNPQGQVWLQGR                     | LYK | rep1 |
| 1464.2721 | 4389.7928 | 4390.751  | 218.22 | 3 | 3.52 | 1.78 | SGDTIATTPGVAQWIFYNDGQEPLVIVSVFDLASHQNQLDR | LYT | rep1 |
| 718.7464  | 1435.4771 | 1435.7218 | 170.44 | 2 | 1.8  | 0.31 | VQGPFGVIRPPLR                             | LYT | rep1 |

**Matching Genes:**

[NP\\_199225.1](#) (CRA1 (CRUCIFERINA); nutrient reservoir [Arabidopsis thaliana])

**Protein Group 67**

**Expression Quality:**

| Group                 | Group Probability | Num Peptides | % Seq Coverage | Num Spectra |
|-----------------------|-------------------|--------------|----------------|-------------|
| Total (Non-Redundant) | 1                 | 4            | 23.6           | 23.0        |

**Peptides:**

| Observed  | Mr(expt)  | Mr(calc)  | Mass Error (ppm) | Charge | Score | Score Delta | Peptide                                           | Group | Replicate |
|-----------|-----------|-----------|------------------|--------|-------|-------------|---------------------------------------------------|-------|-----------|
| 1134.6122 | 3400.8131 | 3401.7718 | 281.83           | 3      | 4.43  | 2.16        | ITEIAGVVVSFDPKPIPGDWNGAGAHCNYSK : +57.05000 (C27) | LYT   | rep3      |
| 1126.5791 | 2251.1426 | 2252.4541 | 582.24           | 2      | 5.1   | 2.99        | LTGHHETADINTFLWGVANR                              | LYK   | rep3      |
| 751.6394  | 2251.8947 | 2252.4541 | 248.33           | 3      | 3.91  | 1.75        | LTGHHETADINTFLWGVANR                              | LYT   | rep1      |
| 804.2198  | 2409.6361 | 2408.6404 | 413.39           | 3      | 5.25  | 2.44        | RLTGHHETADINTFLWGVANR                             | LYT   | rep3      |
| 803.6918  | 2408.0518 | 2408.6404 | 244.34           | 3      | 4.13  | 1.92        | RLTGHHETADINTFLWGVANR                             | LYK   | rep1      |
| 1163.8993 | 3488.6744 | 3488.7397 | 18.73            | 3      | 4.18  | 0.01        | WNYDGSSTGQAPGEDSEVILYPQAIKDPFR                    | LYT   | rep2      |

**Matching Genes:**

[NP\\_198576.1](#) (ATGSR1 (Arabidopsis thaliana glutamine synthase clone R1); glutamate-ammonia ligase)

---

**Protein Group 68**

**Expression Quality:**

| Group                 | Group Probability | Num Peptides | % Seq Coverage | Num Spectra |
|-----------------------|-------------------|--------------|----------------|-------------|
| Total (Non-Redundant) | 1                 | 7            | 21.49          | 39.0        |

**Peptides:**

| Observed | Mr(expt)  | Mr(calc)  | Mass Error (ppm) | Charge | Score | Score Delta | Peptide                           | Group | Replicate |
|----------|-----------|-----------|------------------|--------|-------|-------------|-----------------------------------|-------|-----------|
| 1032.698 | 2063.3804 | 2064.176  | 385.44           | 2      | 2.38  | 0.4         | APTNDRFDDLFFYGIDSA                | LYT   | rep2      |
| 996.708  | 1991.4004 | 1992.1577 | 380.13           | 2      | 3.36  | 1.92        | FEYVNGSQVVVGDEHGKK                | LYT   | rep2      |
| 996.5525 | 1991.0894 | 1992.1577 | 536.26           | 2      | 3.22  | 1.72        | FEYVNGSQVVVGDEHGKK                | LYK   | rep2      |
| 647.0669 | 1292.1182 | 1292.4447 | 252.61           | 2      | 2.88  | 1.41        | HLYVFDLETR                        | LYT   | rep2      |
| 647.1592 | 1292.3028 | 1292.4447 | 109.81           | 2      | 2.63  | 0.82        | HLYVFDLETR                        | LYK   | rep2      |
| 776.5347 | 1551.0537 | 1551.6169 | 362.97           | 2      | 2.52  | 1.12        | LDKFGGEEETPSSR                    | LYK   | rep1      |
| 518.2197 | 1551.6357 | 1551.6169 | 12.1             | 3      | 2.39  | 0.52        | LDKFGGEEETPSSR                    | LYT   | rep2      |
| 762.021  | 1522.0264 | 1522.7049 | 445.62           | 2      | 2.42  | 0.84        | LNTLDSYNIVDKK                     | LYT   | rep1      |
| 508.7598 | 1523.2558 | 1522.7049 | 361.77           | 3      | 1.99  | 0.49        | LNTLDSYNIVDKK                     | LYK   | rep2      |
| 545.9337 | 1634.7777 | 1634.7759 | 1.08             | 3      | 2.8   | 1.15        | WFHCS TPGDSLTAAR : +57.05000 (C4) | LYT   | rep3      |
| 545.8763 | 1634.6056 | 1634.7759 | 104.2            | 3      | 2.38  | 0.63        | WFHCSTPGDSLTAAR : +57.05000 (C4)  | LYK   | rep1      |
| 564.9771 | 1691.9077 | 1691.8486 | 34.91            | 3      | 2.22  | 0.47        | WTQVETFGVRPSEK                    | LYK   | rep1      |
| 846.7283 | 1691.441  | 1691.8486 | 240.96           | 2      | 2.2   | 0.39        | WTQVETFGVRPSEK                    | LYT   | rep3      |

**Matching Genes:**

[NP\\_001030709.1](#) (ATMLP-470 (MYROSINASE-BINDING PROTEIN-LIKE PROTEIN-470) [Arabidopsis thaliana])

---

**Protein Group 69**

**Expression Quality:**

| Group                 | Group Probability | Num Peptides | % Seq Coverage | Num Spectra |
|-----------------------|-------------------|--------------|----------------|-------------|
| Total (Non-Redundant) | 1                 | 4            | 37.75          | 33.0        |

**Peptides:**

| Observed | Mr(expt)  | Mr(calc)  | Mass Error (ppm) | Charge | Score | Score Delta | Peptide                                        | Group | Replicate |
|----------|-----------|-----------|------------------|--------|-------|-------------|------------------------------------------------|-------|-----------|
| 942.2828 | 2823.825  | 2824.121  | 104.8            | 3      | 5.37  | 2.91        | HTGPGILSMANAGANTNGSQFFICTEK : +57.05000 (C24)  | LYT   | rep2      |
| 942.0829 | 2823.2252 | 2824.121  | 317.2            | 3      | 2.01  | 0.24        | HTGPGILSMANAGANTNGSQFFICTEK : +57.05000 (C24)  | LYK   | rep2      |
| 827.0634 | 1652.1111 | 1651.9139 | 119.37           | 2      | 4.86  | 3.17        | HVVFGQVVEGLNVVR                                | LYK   | rep2      |
| 551.532  | 1651.5725 | 1651.9139 | 206.7            | 3      | 4.54  | 1.63        | HVVFGQVVEGLNVVR                                | LYT   | rep1      |
| 984.5961 | 2950.7647 | 2952.2939 | 517.96           | 3      | 5.8   | 3.65        | KHTGPGILSMANAGANTNGSQFFICTEK : +57.05000 (C25) | LYT   | rep2      |
| 984.7023 | 2951.0833 | 2952.2939 | 410.04           | 3      | 4.85  | 2.99        | KHTGPGILSMANAGANTNGSQFFICTEK : +57.05000 (C25) | LYK   | rep1      |
| 738.1184 | 1474.2212 | 1474.6838 | 313.67           | 2      | 2.42  | 0.75        | TSKPVVIADCGQIS : +57.05000 (C10)               | LYK   | rep2      |
| 737.7096 | 1473.4036 | 1474.6838 | 868.11           | 2      | 2.28  | 1.03        | TSKPVVIADCGQIS : +57.05000 (C10)               | LYT   | rep1      |

**Matching Genes:**

[NP\\_001077901.1](#) (ROC3 (rotamase CyP 3) [Arabidopsis thaliana])

**Protein Group 70****Expression Quality:**

| Group                 | Group Probability | Num Peptides | % Seq Coverage | Num Spectra |
|-----------------------|-------------------|--------------|----------------|-------------|
| Total (Non-Redundant) | 1                 | 6            | 48.82          | 30.0        |

**Peptides:**

| Observed | Mr(expt)  | Mr(calc)  | Mass Error (ppm) | Charge | Score | Score Delta | Peptide                    | Group | Replicate |
|----------|-----------|-----------|------------------|--------|-------|-------------|----------------------------|-------|-----------|
| 808.9261 | 2423.755  | 2423.7268 | 11.62            | 3      | 2.2   | 0.75        | AILNESSEFVGDKVAYALAQGLK    | LYT   | rep2      |
| 930.8149 | 2789.4213 | 2789.1526 | 96.36            | 3      | 4.09  | 1.82        | ELGGQADVDGFLVGGASLKPEFIDIK | LYT   | rep2      |
| 931.1654 | 2790.4727 | 2789.1526 | 473.32           | 3      | 3.32  | 1.39        | ELGGQADVDGFLVGGASLKPEFIDIK | LYK   | rep2      |

|           |           |           |        |   |      |      |                               |     |      |
|-----------|-----------|-----------|--------|---|------|------|-------------------------------|-----|------|
| 478.2046  | 954.3936  | 954.0858  | 322.6  | 2 | 2.01 | 0.27 | FFVGGNWK                      | LYT | rep1 |
| 1043.1444 | 3126.4098 | 3126.5552 | 46.51  | 3 | 2.82 | 0.96 | KGGAFTGEVSAEMLVNLDIPWVILGHSER | LYT | rep3 |
| 1042.9977 | 3125.9696 | 3126.5552 | 187.3  | 3 | 2.31 | 0.79 | KGGAFTGEVSAEMLVNLDIPWVILGHSER | LYK | rep3 |
| 889.7273  | 1777.439  | 1777.9398 | 281.68 | 2 | 3.87 | 2.2  | VASPAQAQEVHDELK               | LYT | rep1 |
| 889.6378  | 1777.26   | 1777.9398 | 382.33 | 2 | 3.57 | 1.4  | VASPAQAQEVHDELK               | LYK | rep1 |
| 1152.8655 | 2303.7154 | 2304.6086 | 387.6  | 2 | 3.38 | 1.8  | VTNWSNVVIA YEPVWAIGTGK        | LYT | rep1 |
| 1153.1924 | 2304.3692 | 2304.6086 | 103.9  | 2 | 1.5  | 0.37 | VTNWSNVVIA YEPVWAIGTGK        | LYK | rep2 |

**Matching Genes:**

[NP\\_191104.1](#) (ATCTIMC (CYTOSOLIC TRIOSE PHOSPHATE ISOMERASE); triose-phosphate isomerase [Arabidopsis thaliana])

**Protein Group 71**

**Expression Quality:**

| Group                 | Group Probability | Num Peptides | % Seq Coverage | Num Spectra |
|-----------------------|-------------------|--------------|----------------|-------------|
| Total (Non-Redundant) | 1                 | 5            | 14.8           | 17.0        |

**Peptides:**

| Observed  | Mr(expt)  | Mr(calc)  | Mass Error (ppm) | Charge | Score | Score Delta | Peptide                               | Group | Replicate |
|-----------|-----------|-----------|------------------|--------|-------|-------------|---------------------------------------|-------|-----------|
| 1067.0833 | 2132.1509 | 2131.3957 | 354.35           | 2      | 2.95  | 1.52        | ATGQEYAEFLHEFMCAVK : +57.05000 (C15)  | LYK   | rep2      |
| 711.3339  | 2130.9781 | 2131.3957 | 195.91           | 3      | 2.78  | 1.14        | ATGQEYAEFLHEFMCAVK : +57.05000 (C15)  | LYT   | rep3      |
| 789.203   | 2364.5855 | 2364.6626 | 32.59            | 3      | 1.86  | 0.53        | DAHILTGLLPVILSQDVQER                  | LYK   | rep2      |
| 695.605   | 1389.1944 | 1389.6018 | 293.19           | 2      | 3.63  | 1.84        | KPQGLYISLNEK                          | LYT   | rep3      |
| 696.076   | 1390.1363 | 1389.6018 | 384.62           | 2      | 2.95  | 1.23        | KPQGLYISLNEK                          | LYK   | rep2      |
| 763.4725  | 2287.3941 | 2287.582  | 82.14            | 3      | 4.36  | 2.26        | RATGQEYAEFLHEFMCAVK : +57.05000 (C16) | LYK   | rep1      |
| 763.358   | 2287.0506 | 2287.582  | 232.3            | 3      | 3.39  | 1.06        | RATGQEYAEFLHEFMCAVK : +57.05000 (C16) | LYT   | rep2      |
| 1292.6146 | 3874.8204 | 3876.3271 | 388.7            | 3      | 5.39  | 3.44        | VRDDMLLAASEA LAAQVTEEHYANGLIYPPFSNIR  | LYT   | rep3      |
| 1292.766  | 3875.2745 | 3876.3271 | 271.56           | 3      | 4.63  | 2.78        | VRDDMLLAASEA LAAQVTEEHYANGLIYPPFSNIR  | LYK   | rep2      |

**Matching Genes:**

[NP\\_196728.1](#) (ATNADP-ME2 (NADP-MALIC ENZYME 2); malate dehydrogenase (oxaloacetate-decarboxylating) (NADP+)/ malic enzyme/ oxidoreductase, acting on NADH or NADPH, NAD or NADP as acceptor [Arabidopsis thaliana])

### Protein Group 72

#### Expression Quality:

| Group                 | Group Probability | Num Peptides | % Seq Coverage | Num Spectra |
|-----------------------|-------------------|--------------|----------------|-------------|
| Total (Non-Redundant) | 1                 | 5            | 38.71          | 21.0        |

#### Peptides:

| Observed  | Mr(expt)  | Mr(calc)  | Mass Error (ppm) | Charge | Score | Score Delta | Peptide                                       | Group | Replicate |
|-----------|-----------|-----------|------------------|--------|-------|-------------|-----------------------------------------------|-------|-----------|
| 1528.2159 | 4581.6244 | 4581.2524 | 81.18            | 3      | 3.86  | 2.58        | ANVPVAEVNVPVIGGHAGVTILPLFSQATPQANLSSDILTALTKR | LYT   | rep1      |
| 1527.6251 | 4579.8519 | 4581.2524 | 305.71           | 3      | 1.61  | 0.26        | ANVPVAEVNVPVIGGHAGVTILPLFSQATPQANLSSDILTALTKR | LYK   | rep1      |
| 674.4392  | 1346.8628 | 1347.608  | 552.97           | 2      | 3.14  | 0.93        | KLFGVTTLDVVR                                  | LYT   | rep1      |
| 1003.3827 | 3007.1246 | 3008.3552 | 409.07           | 3      | 4.57  | 2.54        | LNPLVSSLSLYDIANTPGVAADVGHINTR                 | LYT   | rep1      |
| 1003.5995 | 3007.775  | 3008.3552 | 192.87           | 3      | 2.19  | 0.92        | LNPLVSSLSLYDIANTPGVAADVGHINTR                 | LYK   | rep2      |
| 898.1186  | 1794.2215 | 1793.2303 | 552.71           | 2      | 2.37  | 0.79        | VAILGAAGGIGQPLALLMK                           | LYT   | rep2      |
| 1010.7312 | 3029.1701 | 3028.5597 | 201.56           | 3      | 4.22  | 2.17        | YCPHALINMISNPVNSTVPIAAEIFKK : +57.05000 (C2)  | LYK   | rep1      |
| 1514.7085 | 3027.4014 | 3028.5597 | 382.46           | 2      | 3.39  | 1.66        | YCPHALINMISNPVNSTVPIAAEIFKK : +57.05000 (C2)  | LYT   | rep1      |

#### Matching Genes:

[NP\\_564625.1](#) (malate dehydrogenase (NAD), mitochondrial [Arabidopsis thaliana])

### Protein Group 73

#### Expression Quality:

| Group                 | Group Probability | Num Peptides | % Seq Coverage | Num Spectra |
|-----------------------|-------------------|--------------|----------------|-------------|
| Total (Non-Redundant) | 1                 | 7            | 19.74          | 27.0        |

**Peptides:**

| Observed  | Mr(expt)  | Mr(calc)  | Mass Error (ppm) | Charge | Score | Score Delta | Peptide                                | Group | Replicate |
|-----------|-----------|-----------|------------------|--------|-------|-------------|----------------------------------------|-------|-----------|
| 393.214   | 1176.6185 | 1176.3321 | 243.43           | 3      | 2.72  | 0.87        | HRLGDLFYR                              | LYT   | rep2      |
| 393.0869  | 1176.2371 | 1176.3321 | 80.81            | 3      | 2.51  | 0.76        | HRLGDLFYR                              | LYK   | rep1      |
| 570.0897  | 1707.2457 | 1705.9601 | 753.6            | 3      | 3.77  | 1.32        | KHFPSVNWLSYSK                          | LYK   | rep2      |
| 570.1155  | 1707.323  | 1705.9601 | 798.9            | 3      | 3.36  | 1.26        | KHFPSVNWLSYSK                          | LYT   | rep2      |
| 1283.4244 | 3847.2498 | 3847.3022 | 13.62            | 3      | 2.04  | 0.66        | NGSVTIVGAVSPPGGDFSDPVTSATLSIVQVFWGLDKK | LYK   | rep1      |
| 601.8159  | 1802.4243 | 1802.0062 | 232              | 3      | 2.92  | 0.48        | NIIHFYNLANQAVR                         | LYT   | rep3      |
| 602.0497  | 1803.1256 | 1802.0062 | 621.17           | 3      | 2.78  | 0.04        | NIIHFYNLANQAVR                         | LYK   | rep1      |
| 773.2832  | 1544.5508 | 1545.7668 | 786.68           | 2      | 2.38  | 0.85        | TTLVANTSMPVAAR                         | LYT   | rep1      |
| 668.8466  | 1335.6775 | 1335.5141 | 122.33           | 2      | 1.59  | 0.5         | VGHDLNLIQEIR                           | LYK   | rep2      |
| 668.585   | 1335.1543 | 1335.5141 | 269.42           | 2      | 1.14  | 0.02        | VGHDLNLIQEIR                           | LYT   | rep2      |
| 1228.1731 | 2454.3306 | 2455.6826 | 550.56           | 2      | 2.32  | 1.01        | YSTALESFYEKFDPDFINIR                   | LYK   | rep1      |

**Matching Genes:**

[NP\\_001031299.1](#) (VHA-A; ATP binding / hydrogen ion transporting ATP synthase, rotational mechanism [Arabidopsis thaliana])

**Protein Group 74****Expression Quality:**

| Group                 | Group Probability | Num Peptides | % Seq Coverage | Num Spectra |
|-----------------------|-------------------|--------------|----------------|-------------|
| Total (Non-Redundant) | 1                 | 5            | 21.37          | 34.0        |

**Peptides:**

| Observed | Mr(expt)  | Mr(calc)  | Mass Error (ppm) | Charge | Score | Score Delta | Peptide                          | Group | Replicate |
|----------|-----------|-----------|------------------|--------|-------|-------------|----------------------------------|-------|-----------|
| 974.1543 | 1946.293  | 1947.1667 | 448.72           | 2      | 2.56  | 0.82        | HTAFFSNYRPQFYLR                  | LYK   | rep3      |
| 974.2744 | 1946.5332 | 1947.1667 | 325.34           | 2      | 2.05  | 0.56        | HTAFFSNYRPQFYLR                  | LYT   | rep1      |
| 590.6725 | 1768.994  | 1768.9119 | 46.39            | 3      | 5.2   | 2.95        | HYAHVDCPGHADYVK : +57.05000 (C7) | LYT   | rep3      |

|           |           |           |        |   |      |      |                                                 |     |      |
|-----------|-----------|-----------|--------|---|------|------|-------------------------------------------------|-----|------|
| 590.6534  | 1768.9369 | 1768.9119 | 14.1   | 3 | 5.2  | 2.86 | HYAHVDCPGHADYVK : +57.05000 (C7)                | LYK | rep1 |
| 604.1041  | 1809.2889 | 1809.0019 | 158.63 | 3 | 3.9  | 1.9  | NKPHVNVGTIGHVDHGK                               | LYK | rep3 |
| 604.2853  | 1809.8324 | 1809.0019 | 459.05 | 3 | 1.81 | 0.18 | NKPHVNVGTIGHVDHGK                               | LYT | rep1 |
| 1186.5997 | 3556.7757 | 3556.1252 | 182.92 | 3 | 3.08 | 1    | QVGVPSLVCFLNKVDVDDPELLELVEMELR : +57.05000 (C9) | LYK | rep3 |
| 735.9926  | 2204.9542 | 2204.5972 | 161.95 | 3 | 3    | 1.34 | VLDKPFLMPIEDVFSIQGR                             | LYT | rep3 |
| 735.882   | 2204.6224 | 2204.5972 | 11.45  | 3 | 2.66 | 1.21 | VLDKPFLMPIEDVFSIQGR                             | LYK | rep2 |

**Matching Genes:**

[NP\\_192202.1](#) (elongation factor Tu, putative / EF-Tu, putative [Arabidopsis thaliana])

**Protein Group 75**

**Expression Quality:**

| Group                 | Group Probability | Num Peptides | % Seq Coverage | Num Spectra |
|-----------------------|-------------------|--------------|----------------|-------------|
| Total (Non-Redundant) | 1                 | 6            | 24.43          | 26.0        |

**Peptides:**

| Observed | Mr(expt)  | Mr(calc)  | Mass Error (ppm) | Charge | Score | Score Delta | Peptide                       | Group | Replicate |
|----------|-----------|-----------|------------------|--------|-------|-------------|-------------------------------|-------|-----------|
| 711.8361 | 2132.4847 | 2133.2432 | 355.54           | 3      | 4.41  | 2.35        | GSFETIHIQDSTGHEFATR           | LYK   | rep2      |
| 712.1031 | 2133.286  | 2133.2432 | 20.07            | 3      | 4.28  | 2.21        | GSFETIHIQDSTGHEFATR           | LYT   | rep3      |
| 556.9143 | 1111.813  | 1112.3263 | 461.43           | 2      | 1.83  | 0.47        | GTKPWVSLPK                    | LYT   | rep1      |
| 800.3339 | 2397.9781 | 2398.5559 | 240.89           | 3      | 4.45  | 2.09        | HKGSFETIHIQDSTGHEFATR         | LYT   | rep2      |
| 416.4721 | 830.9285  | 828.9817  | 2348.45          | 2      | 1.75  | 0.22        | HWMLDK                        | LYT   | rep1      |
| 415.4707 | 828.9258  | 828.9817  | 67.38            | 2      | 1.13  | 0.15        | HWMLDK                        | LYK   | rep2      |
| 726.0447 | 1450.0738 | 1450.6468 | 395.05           | 2      | 2.06  | 0.58        | LGGAFAPKPSSGPHK               | LYT   | rep1      |
| 484.6642 | 1450.9691 | 1450.6468 | 222.13           | 3      | 2.03  | 0.68        | LGGAFAPKPSSGPHK               | LYK   | rep2      |
| 490.5507 | 1468.6287 | 1468.8119 | 124.73           | 3      | 2.97  | 0.5         | SRECLPLVLIIR : +57.05000 (C4) | LYK   | rep1      |

**Matching Genes:**

[NP\\_200650.1](#) (40S ribosomal protein S4 (RPS4D) [Arabidopsis thaliana])

---

**Protein Group 76**

**Expression Quality:**

| Group                 | Group Probability | Num Peptides | % Seq Coverage | Num Spectra |
|-----------------------|-------------------|--------------|----------------|-------------|
| Total (Non-Redundant) | 1                 | 5            | 22.65          | 17.0        |

**Peptides:**

| Observed  | Mr(expt)  | Mr(calc)  | Mass Error (ppm) | Charge | Score | Score Delta | Peptide                                                           | Group | Replicate |
|-----------|-----------|-----------|------------------|--------|-------|-------------|-------------------------------------------------------------------|-------|-----------|
| 794.4672  | 2380.378  | 2379.6575 | 302.8            | 3      | 2.1   | 0.67        | FLHDPSKDTGFVGSALSSNMIR                                            | LYK   | rep1      |
| 994.6689  | 2980.9834 | 2982.2795 | 434.62           | 3      | 4.92  | 3.2         | GFNLQHVADGLYGSHLHVYSWPGGEIK                                       | LYT   | rep3      |
| 994.8301  | 2981.4668 | 2982.2795 | 272.53           | 3      | 4.81  | 3.11        | GFNLQHVADGLYGSHLHVYSWPGGEIK                                       | LYK   | rep1      |
| 482.6285  | 1444.8621 | 1443.6761 | 821.52           | 3      | 1.67  | 0.14        | HKTMISTSWGAPK                                                     | LYT   | rep2      |
| 1137.7045 | 3410.0899 | 3411.6907 | 469.2            | 3      | 3.84  | 1.84        | LPMPFVGDELHHSGWNSCSSCHGDASVDRR : +57.05000 (C18); +57.05000 (C21) | LYK   | rep1      |
| 1137.9286 | 3410.7623 | 3411.6907 | 272.13           | 3      | 2.8   | 1.13        | LPMPFVGDELHHSGWNSCSSCHGDASVDRR : +57.05000 (C18); +57.05000 (C21) | LYT   | rep2      |
| 809.6925  | 2426.054  | 2426.6511 | 246.05           | 3      | 4.82  | 2.7         | WEKPGHSPLYGYDFWYQPR                                               | LYK   | rep3      |



|          |          |           |        |   |      |      |                     |     |      |
|----------|----------|-----------|--------|---|------|------|---------------------|-----|------|
| 809.7035 | 2426.087 | 2426.6511 | 232.47 | 3 | 3.73 | 1.99 | WEKPGHSPLYGYDFWYQPR | LYT | rep3 |
|----------|----------|-----------|--------|---|------|------|---------------------|-----|------|

**Matching Genes:**

[NP\\_193139.1](#) (selenium-binding protein, putative [Arabidopsis thaliana])

**Protein Group 77**

**Expression Quality:**

| Group                 | Group Probability | Num Peptides | % Seq Coverage | Num Spectra |
|-----------------------|-------------------|--------------|----------------|-------------|
| Total (Non-Redundant) | 1                 | 6            | 25.06          | 27.0        |

**Peptides:**

| Observed  | Mr(expt)  | Mr(calc)  | Mass Error (ppm) | Charge | Score | Score Delta | Peptide                            | Group | Replicate |
|-----------|-----------|-----------|------------------|--------|-------|-------------|------------------------------------|-------|-----------|
| 1295.513  | 2589.0103 | 2588.9702 | 15.48            | 2      | 2.8   | 0.67        | AQEMFAHLLFGADTNVVQPMNVR            | LYT   | rep1      |
| 599.9724  | 1796.8938 | 1797.2192 | 181.06           | 3      | 5.24  | 1.63        | FVIQTLAPLGCLPIVR : +57.05000 (C11) | LYK   | rep2      |
| 600.1675  | 1797.479  | 1797.2192 | 144.56           | 3      | 3.48  | 1.25        | FVIQTLAPLGCLPIVR : +57.05000 (C11) | LYT   | rep2      |
| 566.5301  | 1131.0445 | 1131.3749 | 292.03           | 2      | 1.81  | 0.55        | IGPMLNEMAR                         | LYT   | rep2      |
| 519.397   | 1555.1674 | 1553.7191 | 932.17           | 3      | 2.99  | 0.52        | LKNDISALYSSGASK                    | LYT   | rep1      |
| 778.1834  | 1554.3511 | 1553.7191 | 406.77           | 2      | 2.75  | 0.86        | LKNDISALYSSGASK                    | LYK   | rep2      |
| 1246.9109 | 2491.8062 | 2492.7493 | 378.32           | 2      | 2.8   | 1.34        | NSPASAPFQFTVDFYNAVLTR              | LYK   | rep3      |
| 1247.3513 | 2492.687  | 2492.7493 | 24.96            | 2      | 2.57  | 1.01        | NSPASAPFQFTVDFYNAVLTR              | LYT   | rep2      |
| 684.4795  | 1366.9434 | 1366.5683 | 274.44           | 2      | 1.65  | 0.76        | TLVAQGFWPYGK                       | LYK   | rep2      |

**Matching Genes:**

[NP\\_175802.1](#) (myrosinase-associated protein, putative [Arabidopsis thaliana])

**Protein Group 78**

**Expression Quality:**

| Group                 | Group Probability | Num Peptides | % Seq Coverage | Num Spectra |
|-----------------------|-------------------|--------------|----------------|-------------|
| Total (Non-Redundant) | 1                 | 5            | 18.24          | 23.0        |

**Peptides:**

| Observed  | Mr(expt)  | Mr(calc)  | Mass Error (ppm) | Charge | Score | Score Delta | Peptide                                                        | Group | Replicate |
|-----------|-----------|-----------|------------------|--------|-------|-------------|----------------------------------------------------------------|-------|-----------|
| 1453.1505 | 4356.4281 | 4355.9447 | 110.96           | 3      | 5.02  | 2.97        | AGVGIDNVDLSAATEFGCLVVNAPTANTIAAAEHGIALMAAMAR : +57.05000 (C18) | LYT   | rep1      |
| 1452.5614 | 4354.6607 | 4355.9447 | 294.76           | 3      | 4.61  | 1.2         | AGVGIDNVDLSAATEFGCLVVNAPTANTIAAAEHGIALMAAMAR : +57.05000 (C18) | LYK   | rep3      |
| 1157.2985 | 3468.8719 | 3469.9289 | 304.63           | 3      | 4.94  | 2.81        | AHAIGVDLVSFDEALATADFISLHMPLTPTTSK                              | LYT   | rep1      |
| 1157.444  | 3469.3084 | 3469.9289 | 178.83           | 3      | 4.68  | 2.98        | AHAIGVDLVSFDEALATADFISLHMPLTPTTSK                              | LYK   | rep2      |
| 583.0768  | 1164.138  | 1163.3716 | 658.78           | 2      | 1.76  | 0.26        | NKYVGVSLVGK                                                    | LYT   | rep1      |
| 442.4991  | 1324.474  | 1324.4468 | 20.53            | 3      | 2.78  | 0.98        | VIAHDPYAPADR                                                   | LYT   | rep3      |

|          |           |           |        |   |      |      |              |     |      |
|----------|-----------|-----------|--------|---|------|------|--------------|-----|------|
| 442.6995 | 1325.0751 | 1324.4468 | 474.41 | 3 | 1.86 | 0.38 | VIAHDPYAPADR | LYK | rep1 |
| 365.5682 | 1093.6812 | 1093.2814 | 365.76 | 3 | 2.43 | 0.58 | VKDGVPHLTK   | LYK | rep3 |

**Matching Genes:**

[NP\\_195146.1](#) (EDA9 (embryo sac development arrest 9); NAD binding / amino acid binding / cofactor binding / oxidoreductase, acting on the CH-OH group of donors, NAD or NADP as acceptor / phosphoglycerate dehydrogenase [Arabidopsis thaliana])

---

**Protein Group 79**

**Expression Quality:**

| Group                 | Group Probability | Num Peptides | % Seq Coverage | Num Spectra |
|-----------------------|-------------------|--------------|----------------|-------------|
| Total (Non-Redundant) | 1                 | 7            | 29.97          | 26.0        |

**Peptides:**

| Observed  | Mr(expt)  | Mr(calc)  | Mass Error (ppm) | Charge | Score | Score Delta | Peptide                             | Group | Replicate |
|-----------|-----------|-----------|------------------|--------|-------|-------------|-------------------------------------|-------|-----------|
| 699.7305  | 1397.4453 | 1397.6239 | 127.75           | 2      | 2.24  | 0.51        | AILLWTLEPGER                        | LYK   | rep2      |
| 601.73    | 1201.4444 | 1201.3351 | 90.98            | 2      | 1.76  | 0.24        | DALLANEATKR                         | LYT   | rep1      |
| 601.7185  | 1201.4214 | 1201.3351 | 71.88            | 2      | 1.3   | 0.04        | DALLANEATKR                         | LYK   | rep2      |
| 580.8943  | 1159.773  | 1160.1984 | 366.63           | 2      | 2.1   | 0.57        | HYNDEDVIR                           | LYT   | rep2      |
| 581.2737  | 1160.5318 | 1160.1984 | 287.38           | 2      | 1.53  | 0.51        | HYNDEDVIR                           | LYK   | rep2      |
| 614.7721  | 1841.2928 | 1841.9392 | 350.93           | 3      | 2.63  | 1.1         | SLEEDVAHHTTGDFRK                    | LYK   | rep3      |
| 737.9052  | 2210.692  | 2210.5603 | 59.55            | 3      | 3.29  | 1.2         | STIQCLTRPELYFVDVLR : +57.05000 (C5) | LYK   | rep1      |
| 1105.8931 | 2209.7705 | 2210.5603 | 357.28           | 2      | 2.45  | 0.94        | STIQCLTRPELYFVDVLR : +57.05000 (C5) | LYT   | rep2      |
| 748.6698  | 2242.9859 | 2243.4839 | 221.95           | 3      | 2.27  | 0.48        | TAFEGWGTNEDLIISLAHR                 | LYK   | rep3      |
| 748.8495  | 2243.525  | 2243.4839 | 18.32            | 3      | 1.37  | 0.18        | TAFEGWGTNEDLIISLAHR                 | LYT   | rep1      |

|          |           |           |        |   |      |      |           |     |      |
|----------|-----------|-----------|--------|---|------|------|-----------|-----|------|
| 514.0721 | 1026.1285 | 1026.1518 | 22.79  | 2 | 2.47 | 0.56 | TSTQLLHAR | LYK | rep3 |
| 514.0074 | 1025.9991 | 1026.1518 | 148.89 | 2 | 0.87 | 0.01 | TSTQLLHAR | LYT | rep3 |

**Matching Genes:**

[NP\\_174810.1](#) (ANNAT1 (ANNEXIN ARABIDOPSIS 1); calcium ion binding / calcium-dependent phospholipid binding [Arabidopsis thaliana])

---

**Protein Group 80**

**Expression Quality:**

| Group                 | Group Probability | Num Peptides | % Seq Coverage | Num Spectra |
|-----------------------|-------------------|--------------|----------------|-------------|
| Total (Non-Redundant) | 1                 | 6            | 24.4           | 9.0         |

**Peptides:**

| Observed  | Mr(expt)  | Mr(calc)  | Mass Error (ppm) | Charge | Score | Score Delta | Peptide                                            | Group | Replicate |
|-----------|-----------|-----------|------------------|--------|-------|-------------|----------------------------------------------------|-------|-----------|
| 692.5402  | 1383.0647 | 1383.4961 | 311.78           | 2      | 1.93  | 0.84        | AHIQMVNDNGER                                       | LYT   | rep1      |
| 1249.3346 | 3744.9803 | 3745.1008 | 32.18            | 3      | 2.58  | 0.87        | CTENLDDPSDADVYKPSLGYISTLNSYNLPILR : +57.05000 (C1) | LYT   | rep1      |
| 756.8281  | 2267.4609 | 2268.5151 | 464.72           | 3      | 2.29  | 0.73        | FSTIETTLTHSSPMSYGRPR                               | LYT   | rep1      |
| 817.6325  | 1633.2493 | 1633.8076 | 341.72           | 2      | 3.51  | 1.95        | HAIGEQFEWIEFK                                      | LYT   | rep1      |
| 750.8533  | 1499.691  | 1500.666  | 649.74           | 2      | 3.08  | 1.28        | IEVWDHHAPQLR                                       | LYT   | rep1      |
| 803.7999  | 2408.3763 | 2408.6836 | 127.57           | 3      | 3.33  | 1.41        | NLRPFLLIAGNNPQQQEWLQGR                             | LYT   | rep1      |

**Matching Genes:**

[NP\\_171884.1](#) (CRU2 (CRUCIFERIN 2); nutrient reservoir [Arabidopsis thaliana])

---

**Protein Group 81****Expression Quality:**

| Group                 | Group Probability | Num Peptides | % Seq Coverage | Num Spectra |
|-----------------------|-------------------|--------------|----------------|-------------|
| Total (Non-Redundant) | 1                 | 7            | 52.14          | 16.0        |

**Peptides:**

| Observed  | Mr(expt)  | Mr(calc)  | Mass Error (ppm) | Charge | Score | Score Delta | Peptide                                                                 | Group | Replicate |
|-----------|-----------|-----------|------------------|--------|-------|-------------|-------------------------------------------------------------------------|-------|-----------|
| 553.1361  | 1104.2566 | 1104.3276 | 64.29            | 2      | 2.36  | 0.9         | IAGFSTHLMK                                                              | LYT   | rep3      |
| 553.0646  | 1104.1136 | 1104.3276 | 193.84           | 2      | 2.21  | 0.82        | IAGFSTHLMK                                                              | LYK   | rep2      |
| 421.2736  | 1260.7974 | 1260.514  | 224.8            | 3      | 1.49  | 0.28        | IAGFSTHLMKR                                                             | LYT   | rep1      |
| 684.5432  | 1367.0708 | 1367.6393 | 415.63           | 2      | 2.28  | 0.6         | ILEEVAIIPSKR                                                            | LYT   | rep1      |
| 617.9366  | 1233.8575 | 1234.4302 | 463.94           | 2      | 2.11  | 0.71        | MTLDFHTNKK                                                              | LYT   | rep3      |
| 617.9357  | 1233.8557 | 1234.4302 | 465.33           | 2      | 1.56  | 0.33        | MTLDFHTNKK                                                              | LYK   | rep2      |
| 449.9357  | 1346.7835 | 1346.6036 | 133.6            | 3      | 3.7   | 1.21        | NKIAGFSTHLMK                                                            | LYT   | rep1      |
| 1294.0145 | 3879.0201 | 3880.3994 | 355.45           | 3      | 2.77  | 0.83        | VDKETLEMLASLGMSDTSGISAVEPQQAMAPIAAFGR                                   | LYT   | rep1      |
| 1315.7469 | 3944.2174 | 3944.3994 | 46.16            | 3      | 1.96  | 0.27        | VDKETLEMLASLGMSDTSGISAVEPQQAMAPIAAFGR : +32.00000 (M8); +32.00000 (M14) | LYK   | rep3      |

**Matching Genes:**

[NP\\_001031325.1](#) (structural constituent of ribosome [Arabidopsis thaliana])

---

**Protein Group 82****Expression Quality:**

| Group | Group Probability | Num Peptides | % Seq Coverage | Num Spectra |
|-------|-------------------|--------------|----------------|-------------|
|-------|-------------------|--------------|----------------|-------------|

|                       |   |   |       |     |
|-----------------------|---|---|-------|-----|
| Total (Non-Redundant) | 1 | 4 | 16.98 | 8.0 |
|-----------------------|---|---|-------|-----|

**Peptides:**

| Observed  | Mr(expt)  | Mr(calc)  | Mass Error (ppm) | Charge | Score | Score Delta | Peptide                                                               | Group | Replicate |
|-----------|-----------|-----------|------------------|--------|-------|-------------|-----------------------------------------------------------------------|-------|-----------|
| 1307.0897 | 3918.2457 | 3918.4016 | 39.78            | 3      | 5.37  | 2.72        | IHDENSSLYNTPPCFGIYMCGLVFEDLLEQGGLK : +57.05000 (C14); +57.05000 (C20) | LYK   | rep3      |
| 663.1337  | 1986.3775 | 1987.1811 | 404.4            | 3      | 2.83  | 0.8         | KADLLYNAIEESNGFFR                                                     | LYT   | rep1      |
| 993.6402  | 1985.2647 | 1987.1811 | 964.41           | 2      | 0.88  | 0.07        | KADLLYNAIEESNGFFR                                                     | LYK   | rep2      |
| 644.8297  | 1931.4657 | 1931.1826 | 146.56           | 3      | 4.96  | 2.56        | YLHICANETIHGVEFK : +57.05000 (C5)                                     | LYK   | rep3      |
| 878.0253  | 2631.0523 | 2630.9805 | 27.32            | 3      | 3.46  | 1.68        | YLHICANETIHGVEFKDYPVPK : +57.05000 (C5)                               | LYK   | rep1      |
| 877.9619  | 2630.8623 | 2630.9805 | 44.92            | 3      | 3.32  | 1.98        | YLHICANETIHGVEFKDYPVPK : +57.05000 (C5)                               | LYT   | rep2      |

**Matching Genes:**

[NP\\_195288.1](#) (PSAT (phosphoserine aminotransferase); phosphoserine transaminase [Arabidopsis thaliana])

**Protein Group 83**

**Expression Quality:**

| Group                 | Group Probability | Num Peptides | % Seq Coverage | Num Spectra |
|-----------------------|-------------------|--------------|----------------|-------------|
| Total (Non-Redundant) | 1                 | 6            | 41.51          | 23.0        |

**Peptides:**

| Observed | Mr(expt)  | Mr(calc)  | Mass Error (ppm) | Charge | Score | Score Delta | Peptide                   | Group | Replicate |
|----------|-----------|-----------|------------------|--------|-------|-------------|---------------------------|-------|-----------|
| 460.4371 | 918.8586  | 918.055   | 875.3            | 2      | 1.57  | 0.26        | LFTERPR                   | LYT   | rep3      |
| 932.1943 | 2793.5595 | 2793.1484 | 147.18           | 3      | 2.63  | 1.05        | NISQYAIMAIGMQVEDHQFDPVASK | LYT   | rep2      |
| 360.5297 | 1078.5655 | 1078.313  | 234.2            | 3      | 2.74  | 0.76        | RVLIALHEK                 | LYT   | rep2      |
| 360.6243 | 1078.8493 | 1078.313  | 497.4            | 3      | 2.72  | 0.67        | RVLIALHEK                 | LYK   | rep1      |
| 386.3024 | 1155.8838 | 1155.3111 | 495.68           | 3      | 2.44  | 1.09        | VFGHPASIATR               | LYT   | rep2      |

|           |           |           |        |   |      |      |                              |     |      |
|-----------|-----------|-----------|--------|---|------|------|------------------------------|-----|------|
| 386.2049  | 1155.5912 | 1155.3111 | 242.41 | 3 | 1.87 | 0.79 | VFGHPASIATR                  | LYK | rep2 |
| 483.183   | 964.3503  | 964.0773  | 283.17 | 2 | 1.69 | 0.4  | VLDVYEAR                     | LYT | rep2 |
| 1048.234  | 3141.6785 | 3142.6157 | 298.21 | 3 | 5.29 | 3.04 | YLAGETFLLTDLHHIPAIQYLLGTPTKK | LYK | rep3 |
| 1048.4222 | 3142.2432 | 3142.6157 | 118.52 | 3 | 3.49 | 1.46 | YLAGETFLLTDLHHIPAIQYLLGTPTKK | LYT | rep2 |

**Matching Genes:**

[NP\\_192161.1](#) (ATGSTF2 (Arabidopsis thaliana Glutathione S-transferase (class phi) 2); glutathione transferase)

**Protein Group 84**

**Expression Quality:**

| Group                 | Group Probability | Num Peptides | % Seq Coverage | Num Spectra |
|-----------------------|-------------------|--------------|----------------|-------------|
| Total (Non-Redundant) | 1                 | 5            | 30.66          | 27.0        |

**Peptides:**

| Observed  | Mr(expt)  | Mr(calc)  | Mass Error (ppm) | Charge | Score | Score Delta | Peptide                   | Group | Replicate |
|-----------|-----------|-----------|------------------|--------|-------|-------------|---------------------------|-------|-----------|
| 1004.7046 | 2007.3936 | 2008.2418 | 422.37           | 2      | 3.24  | 1.47        | ENAITVGTQHALDPLTTVK       | LYT   | rep1      |
| 1004.9601 | 2007.9046 | 2008.2418 | 167.92           | 2      | 1.35  | 0.04        | ENAITVGTQHALDPLTTVK       | LYK   | rep2      |
| 582.0393  | 1162.063  | 1162.3404 | 238.67           | 2      | 2.38  | 1.08        | GPLYTEIGKK                | LYK   | rep2      |
| 581.9488  | 1161.8819 | 1162.3404 | 394.52           | 2      | 2.34  | 0.74        | GPLYTEIGKK                | LYT   | rep3      |
| 591.9964  | 1181.9771 | 1182.292  | 266.34           | 2      | 2.69  | 0.96        | HFNAGFNFTK                | LYT   | rep1      |
| 592.0439  | 1182.0721 | 1182.292  | 186.01           | 2      | 2.42  | 0.88        | HFNAGFNFTK                | LYK   | rep2      |
| 942.8151  | 2825.4217 | 2827.1179 | 599.97           | 3      | 3.62  | 1.8         | LNASYQIVSPSTVVGAEISHNFTTK | LYT   | rep1      |
| 943.2666  | 2826.7763 | 2827.1179 | 120.82           | 3      | 2.82  | 1.23        | LNASYQIVSPSTVVGAEISHNFTTK | LYK   | rep1      |
| 1009.0032 | 2015.9908 | 2017.26   | 629.19           | 2      | 4.37  | 2.73        | VNNAGVANALIQHEWRPK        | LYK   | rep3      |
| 1009.2616 | 2016.5076 | 2017.26   | 372.98           | 2      | 3.71  | 2.4         | VNNAGVANALIQHEWRPK        | LYT   | rep3      |

**Matching Genes:**

[NP\\_197013.1](#) (porin, putative / voltage-dependent anion-selective channel protein, putative [Arabidopsis thaliana])

---

**Protein Group 85****Expression Quality:**

| Group                 | Group Probability | Num Peptides | % Seq Coverage | Num Spectra |
|-----------------------|-------------------|--------------|----------------|-------------|
| Total (Non-Redundant) | 1                 | 3            | 29.14          | 27.0        |

**Peptides:**

| Observed  | Mr(expt)  | Mr(calc)  | Mass Error (ppm) | Charge | Score | Score Delta | Peptide                           | Group | Replicate |
|-----------|-----------|-----------|------------------|--------|-------|-------------|-----------------------------------|-------|-----------|
| 621.0298  | 1240.044  | 1240.4347 | 314.97           | 2      | 3.72  | 1.62        | GLEGHVMEQLK                       | LYK   | rep1      |
| 621.138   | 1240.2603 | 1240.4347 | 140.59           | 2      | 3.63  | 1.39        | GLEGHVMEQLK                       | LYT   | rep3      |
| 1162.172  | 3483.4925 | 3483.6514 | 45.6             | 3      | 6.04  | 3.76        | NENHVFPDAIGHHIQNVTVHEGEHDSHGSIR   | LYK   | rep3      |
| 1266.5206 | 3796.5384 | 3798.0351 | 394.08           | 3      | 6.41  | 3.84        | WKNENHVFPDAIGHHIQNVTVHEGEHDSHGSIR | LYK   | rep3      |
| 1266.661  | 3796.9596 | 3798.0351 | 283.2            | 3      | 4.66  | 2.82        | WKNENHVFPDAIGHHIQNVTVHEGEHDSHGSIR | LYT   | rep2      |

**Matching Genes:**

[NP\\_194099.1](#) (major latex protein-related / MLP-related [Arabidopsis thaliana])

---

**Protein Group 86****Expression Quality:**

| Group                 | Group Probability | Num Peptides | % Seq Coverage | Num Spectra |
|-----------------------|-------------------|--------------|----------------|-------------|
| Total (Non-Redundant) | 1                 | 5            | 34.77          | 9.0         |

**Peptides:**

| Observed | Mr(expt)  | Mr(calc)  | Mass Error (ppm) | Charge | Score | Score Delta | Peptide             | Group | Replicate |
|----------|-----------|-----------|------------------|--------|-------|-------------|---------------------|-------|-----------|
| 549.08   | 1644.2164 | 1643.8689 | 211.4            | 3      | 2.04  | 0.52        | LGDDEFGHMLAGILR     | LYK   | rep1      |
| 789.9221 | 1577.8286 | 1578.6024 | 490.15           | 2      | 2.02  | 0.9         | NGVDDQGINFDTGAR     | LYT   | rep1      |
| 732.7582 | 2195.2511 | 2195.5056 | 115.94           | 3      | 3.17  | 1.39        | NPSADMLLRPDELNLDLIR | LYT   | rep3      |



|           |           |           |        |   |      |      |                                     |     |      |
|-----------|-----------|-----------|--------|---|------|------|-------------------------------------|-----|------|
| 732.891   | 2195.6495 | 2195.5056 | 65.54  | 3 | 2.81 | 0.82 | NPSADMLLRPDELNLDLIR                 | LYK | rep3 |
| 1216.7167 | 3647.1265 | 3647.9714 | 231.6  | 3 | 3.34 | 1.66 | TFKGAVDPFHVNAVDTTGAGDSFVGALLNQIVDDR | LYT | rep1 |
| 1095.9916 | 3284.9513 | 3285.626  | 205.35 | 3 | 4.45 | 2.6  | VSDVELEFLTGSNKIDDETALTLWHPNLK       | LYK | rep1 |
| 1095.8236 | 3284.4473 | 3285.626  | 358.72 | 3 | 2.03 | 0.53 | VSDVELEFLTGSNKIDDETALTLWHPNLK       | LYT | rep3 |

**Matching Genes:**

[NP\\_180697.1](#) (pfkB-type carbohyd rate kinase family protein [Arabidopsis thaliana])

**Protein Group 87**

**Expression Quality:**

| Group                 | Group Probability | Num Peptides | % Seq Coverage | Num Spectra |
|-----------------------|-------------------|--------------|----------------|-------------|
| Total (Non-Redundant) | 1                 | 5            | 19.27          | 21.0        |

**Peptides:**

| Observed | Mr(expt)  | Mr(calc)  | Mass Error (ppm) | Charge | Score | Score Delta | Peptide                                | Group | Replicate |
|----------|-----------|-----------|------------------|--------|-------|-------------|----------------------------------------|-------|-----------|
| 772.6874 | 1543.3592 | 1542.781  | 374.76           | 2      | 2.68  | 0.66        | DGVVLLWDLAEGKK                         | LYT   | rep3      |
| 773.1377 | 1544.2598 | 1542.781  | 958.53           | 2      | 1.47  | 0.09        | DGVVLLWDLAEGKK                         | LYK   | rep1      |
| 774.3114 | 2319.9107 | 2319.6469 | 113.74           | 3      | 4.5   | 2.68        | KLYSLEANSVIHALCFSPNR : +57.05000 (C15) | LYT   | rep3      |
| 774.1971 | 2319.568  | 2319.6469 | 34.03            | 3      | 3.35  | 1.53        | KLYSLEANSVIHALCFSPNR : +57.05000 (C15) | LYK   | rep2      |
| 731.6813 | 2192.0203 | 2191.4742 | 49.32            | 3      | 3.33  | 2.05        | LYSLEANSVIHALCFSPNR : +57.05000 (C14)  | LYT   | rep2      |
| 1096.867 | 2191.7183 | 2191.474  | 111.49           | 2      | 2.75  | 1.11        | LYSLEANSVIHALCFSPNR : +57.05000 (C14)  | LYK   | rep2      |
| 703.7318 | 2108.172  | 2108.2588 | 41.18            | 3      | 1.7   | 0.58        | YTISEGGEGHRDWVSCVR : +57.05000 (C16)   | LYT   | rep3      |
| 725.0037 | 1447.9917 | 1448.6497 | 454.21           | 2      | 2.72  | 0.86        | YWLCAATEHGIK : +57.05000 (C4)          | LYT   | rep3      |
| 483.9981 | 1448.9708 | 1448.6497 | 221.67           | 3      | 1.84  | 0.5         | YWLCAATEHGIK : +57.05000 (C4)          | LYK   | rep2      |

**Matching Genes:**

[NP\\_173248.1](#) (ATARCA (Arabidopsis thaliana Homolog of the Tobacco ArcA); nucleotide binding)

---

**Protein Group 88****Expression Quality:**

| Group                 | Group Probability | Num Peptides | % Seq Coverage | Num Spectra |
|-----------------------|-------------------|--------------|----------------|-------------|
| Total (Non-Redundant) | 1                 | 4            | 25.08          | 15.0        |

**Peptides:**

| Observed | Mr(expt)  | Mr(calc)  | Mass Error (ppm) | Charge | Score | Score Delta | Peptide                       | Group | Replicate |
|----------|-----------|-----------|------------------|--------|-------|-------------|-------------------------------|-------|-----------|
| 708.2448 | 1414.4739 | 1414.6764 | 143.14           | 2      | 1.96  | 0.43        | GREPLFLPCTPK : +57.05000 (C9) | LYT   | rep1      |
| 497.1955 | 1488.563  | 1488.7829 | 147.73           | 3      | 3.21  | 1.04        | HGKVPGLAVVIVGSR               | LYK   | rep3      |
| 497.3528 | 1489.0351 | 1488.7829 | 169.34           | 3      | 2.53  | 0.84        | HGKVPGLAVVIVGSR               | LYT   | rep1      |
| 994.8933 | 2981.6565 | 2982.3193 | 222.27           | 3      | 4.77  | 3.24        | HINEEHILGAISIDKDVDGFHPLNIGK   | LYT   | rep2      |
| 994.8588 | 2981.5528 | 2982.3193 | 257.02           | 3      | 4.23  | 2.65        | HINEEHILGAISIDKDVDGFHPLNIGK   | LYK   | rep1      |
| 774.2056 | 2319.5932 | 2319.668  | 32.22            | 3      | 4.87  | 1.37        | VHELNSNPDVHGILVQLPLPK         | LYK   | rep3      |
| 774.0587 | 2319.1527 | 2319.668  | 222.14           | 3      | 3.11  | 1.02        | VHELNSNPDVHGILVQLPLPK         | LYT   | rep3      |

**Matching Genes:**

[NP\\_187837.1](#) (tetrahydrofolate dehydrogenase/ cyclohydrolase, putative [Arabidopsis thaliana])

---

**Protein Group 89****Expression Quality:**

| Group                 | Group Probability | Num Peptides | % Seq Coverage | Num Spectra |
|-----------------------|-------------------|--------------|----------------|-------------|
| Total (Non-Redundant) | 0.96              | 5            | 19.36          | 62.0        |

**Peptides:**

| Observed | Mr(expt)  | Mr(calc)  | Mass Error (ppm) | Charge | Score | Score Delta | Peptide     | Group | Replicate |
|----------|-----------|-----------|------------------|--------|-------|-------------|-------------|-------|-----------|
| 600.2312 | 1198.4468 | 1198.4224 | 20.41            | 2      | 1.86  | 0.47        | AVFPSIVGRPR | LYT   | rep1      |

|           |           |           |        |   |      |      |                                |     |      |
|-----------|-----------|-----------|--------|---|------|------|--------------------------------|-----|------|
| 600.2521  | 1198.4886 | 1198.4224 | 55.25  | 2 | 1.82 | 0.76 | AVFPSIVGRPR                    | LYK | rep1 |
| 567.023   | 1132.0303 | 1132.1849 | 136.56 | 2 | 1.74 | 0.24 | GYSFTTTAER                     | LYK | rep3 |
| 573.1067  | 1144.1978 | 1144.3736 | 153.67 | 2 | 1.96 | 0.47 | HTGVMVGMGQK                    | LYT | rep1 |
| 506.2698  | 1515.7858 | 1515.6791 | 70.45  | 3 | 3.9  | 1.8  | IWHHTFYNELR                    | LYK | rep3 |
| 758.6241  | 1515.2325 | 1515.6791 | 294.66 | 2 | 3.14 | 1.22 | IWHHTFYNELR                    | LYT | rep1 |
| 1051.7975 | 3152.369  | 3152.5259 | 49.77  | 3 | 5.25 | 0.18 | TTGIVLDSGDGVSHTVPIYEGYALPHAILR | LYK | rep1 |
| 1051.5966 | 3151.7662 | 3152.5259 | 240.97 | 3 | 4.92 | 0.04 | TTGIVLDSGDGVSHTVPIYEGYALPHAILR | LYT | rep2 |

**Matching Genes:**

[NP\\_001031504.1](#) (ACT1 (ACTIN 1); structural constituent of cytoskeleton [Arabidopsis thaliana])

**Protein Group 90**

**Expression Quality:**

| Group                 | Group Probability | Num Peptides | % Seq Coverage | Num Spectra |
|-----------------------|-------------------|--------------|----------------|-------------|
| Total (Non-Redundant) | 1                 | 3            | 17.34          | 13.0        |

**Peptides:**

| Observed  | Mr(expt)  | Mr(calc)  | Mass Error (ppm) | Charge | Score | Score Delta | Peptide                                             | Group | Replicate |
|-----------|-----------|-----------|------------------|--------|-------|-------------|-----------------------------------------------------|-------|-----------|
| 904.8352  | 2711.4821 | 2711.1133 | 136.06           | 3      | 4.29  | 2.52        | AIAIMSHPIPNTNDSHSVQVIIPQK                           | LYT   | rep1      |
| 904.4822  | 2710.4231 | 2711.1133 | 254.59           | 3      | 3.64  | 1.66        | AIAIMSHPIPNTNDSHSVQVIIPQK                           | LYK   | rep2      |
| 732.1591  | 2193.4537 | 2193.4889 | 16.07            | 3      | 4.78  | 2.62        | KSDMYVFCCSYSHNVAPK : +57.05000 (C8); +57.05000 (C9) | LYK   | rep2      |
| 732.0355  | 2193.0831 | 2193.4889 | 185.03           | 3      | 3.38  | 1.35        | KSDMYVFCCSYSHNVAPK : +57.05000 (C8); +57.05000 (C9) | LYT   | rep3      |
| 1261.8021 | 3782.3829 | 3783.1189 | 194.55           | 3      | 5.5   | 2.92        | YGLDGNTIDFIGHAVALHTNDQHLDPAFDVMR                    | LYT   | rep2      |
| 1261.4486 | 3781.3223 | 3783.1189 | 474.88           | 3      | 5.09  | 3.02        | YGLDGNTIDFIGHAVALHTNDQHLDPAFDVMR                    | LYK   | rep2      |

**Matching Genes:**

[NP\\_191551.1](#) (ATGDI2 (RAB GDP DISSOCIATION INHIBITOR 2); RAB GDP-dissociation inhibitor [Arabidopsis thaliana])

**Protein Group 91****Expression Quality:**

| Group                 | Group Probability | Num Peptides | % Seq Coverage | Num Spectra |
|-----------------------|-------------------|--------------|----------------|-------------|
| Total (Non-Redundant) | 1                 | 5            | 24.93          | 25.0        |

**Peptides:**

| Observed  | Mr(expt)  | Mr(calc)  | Mass Error (ppm) | Charge | Score | Score Delta | Peptide                                          | Group | Replicate |
|-----------|-----------|-----------|------------------|--------|-------|-------------|--------------------------------------------------|-------|-----------|
| 735.1372  | 1468.2588 | 1467.6561 | 410.66           | 2      | 3.52  | 0.15        | AMGHHVTVISSSNK                                   | LYK   | rep2      |
| 734.6177  | 1467.2198 | 1467.6561 | 297.31           | 2      | 3.06  | 0.61        | AMGHHVTVISSSNK                                   | LYT   | rep3      |
| 798.9151  | 1595.8145 | 1595.8291 | 9.15             | 2      | 4.01  | 0.1         | AMGHHVTVISSSNKK                                  | LYK   | rep3      |
| 676.5537  | 1351.0918 | 1351.6234 | 393.28           | 2      | 1.74  | 0.58        | GGILGLGGVGHMGVK                                  | LYT   | rep3      |
| 1053.4017 | 3157.1817 | 3156.6862 | 156.96           | 3      | 2.58  | 0.75        | IPEGMAVEQAAPLLCAGVTVYSPLSHFGLK : +57.05000 (C15) | LYK   | rep3      |
| 1090.9506 | 3269.8282 | 3269.7331 | 29.07            | 3      | 2.69  | 0.81        | MSELADSLDYVIDTVPVHHALEPYLSLLK                    | LYT   | rep3      |
| 1090.8319 | 3269.4723 | 3269.7331 | 79.79            | 3      | 1.66  | 0.34        | MSELADSLDYVIDTVPVHHALEPYLSLLK                    | LYK   | rep1      |

**Matching Genes:**

[NP\\_001031788.1](#) (CAD5 (CI NNAMYL ALCOHOL DEHYDROGENASE 5) [Arabidopsis thaliana])

**Protein Group 92****Expression Quality:**

| Group                 | Group Probability | Num Peptides | % Seq Coverage | Num Spectra |
|-----------------------|-------------------|--------------|----------------|-------------|
| Total (Non-Redundant) | 1                 | 4            | 30.8           | 23.0        |

**Peptides:**

| Observed  | Mr(expt)  | Mr(calc)  | Mass Error (ppm) | Charge | Score | Score Delta | Peptide                         | Group | Replicate |
|-----------|-----------|-----------|------------------|--------|-------|-------------|---------------------------------|-------|-----------|
| 1149.8724 | 3446.5938 | 3446.7939 | 58.05            | 3      | 5.3   | 2.78        | AGAHKQEHLALNPFQQIPALEDGDLTLFESR | LYK   | rep3      |
| 1149.6075 | 3445.7992 | 3446.7939 | 288.61           | 3      | 5.27  | 2.84        | AGAHKQEHLALNPFQQIPALEDGDLTLFESR | LYT   | rep2      |
| 1057.5653 | 3169.6724 | 3169.512  | 50.64            | 3      | 5.64  | 2.82        | SEFLAGDSFTLADLHHLPAIHVLLGTDSK   | LYK   | rep3      |

|           |           |           |        |   |      |      |                               |     |      |
|-----------|-----------|-----------|--------|---|------|------|-------------------------------|-----|------|
| 1057.3514 | 3169.0308 | 3169.512  | 151.79 | 3 | 3.36 | 1.57 | SEFLAGDSFTLADLHHLPAIHVLLGTDSK | LYT | rep2 |
| 643.8067  | 1285.5977 | 1286.5301 | 724.78 | 2 | 1.65 | 0.73 | VHGVPSTATMR                   | LYT | rep1 |
| 644.0513  | 1286.0869 | 1286.5301 | 344.48 | 2 | 1.29 | 0.36 | VHGVPSTATMR                   | LYK | rep2 |
| 483.183   | 964.3503  | 964.0773  | 283.17 | 2 | 1.69 | 0.4  | VLDVYEAR                      | LYT | rep2 |

**Matching Genes:**

[NP\\_850479.1](#) (ATGSTF8 (GLUTATHIONE S-TRANSFERASE 8); glutathione transferase [Arabidopsis thaliana])

**Protein Group 93**

**Expression Quality:**

| Group                 | Group Probability | Num Peptides | % Seq Coverage | Num Spectra |
|-----------------------|-------------------|--------------|----------------|-------------|
| Total (Non-Redundant) | 0.95              | 5            | 12.78          | 13.0        |

**Peptides:**

| Observed  | Mr(expt)  | Mr(calc)  | Mass Error (ppm) | Charge | Score | Score Delta | Peptide                                | Group | Replicate |
|-----------|-----------|-----------|------------------|--------|-------|-------------|----------------------------------------|-------|-----------|
| 726.7167  | 2177.1265 | 2176.3915 | 337.74           | 3      | 4.58  | 2.05        | CAHHNNHHEGFMNFMHR : +57.05000 (C1)     | LYK   | rep3      |
| 726.1698  | 2175.4859 | 2176.3915 | 416.09           | 3      | 2.81  | 1.49        | CAHHNNHHEGFMNFMHR : +57.05000 (C1)     | LYT   | rep2      |
| 1122.1092 | 2242.2027 | 2242.4746 | 121.27           | 2      | 2.02  | 0.78        | GFFEVTHTDISNLTCADFLR : +57.05000 (C14) | LYT   | rep3      |
| 606.9702  | 1817.8872 | 1817.1072 | 429.26           | 3      | 3.32  | 1.02        | HRLGPNYLQLPVNAPK                       | LYT   | rep1      |
| 606.5256  | 1816.5534 | 1817.1072 | 304.74           | 3      | 1.52  | 0.2         | HRLGPNYLQLPVNAPK                       | LYK   | rep1      |
| 763.5303  | 1525.045  | 1523.7809 | 829.57           | 2      | 2.52  | 0.87        | LGPNYLQLPVNAPK                         | LYT   | rep3      |
| 762.8079  | 1523.6001 | 1523.7809 | 118.61           | 2      | 1.77  | 0.42        | LGPNYLQLPVNAPK                         | LYK   | rep2      |
| 429.4125  | 1285.2141 | 1284.4689 | 580.22           | 3      | 1.79  | 0.48        | RWVEILSEPR                             | LYT   | rep3      |

**Matching Genes:**

[NP\\_001031073.1](#) (CAT3 (CATALASE 3); catalase [Arabidopsis thaliana])

**Protein Group 94**

**Expression Quality:**

| Group                 | Group Probability | Num Peptides | % Seq Coverage | Num Spectra |
|-----------------------|-------------------|--------------|----------------|-------------|
| Total (Non-Redundant) | 1                 | 3            | 12.52          | 13.0        |

**Peptides:**

| Observed  | Mr(expt)  | Mr(calc)  | Mass Error (ppm) | Charge | Score | Score Delta | Peptide                         | Group | Replicate |
|-----------|-----------|-----------|------------------|--------|-------|-------------|---------------------------------|-------|-----------|
| 561.3221  | 1680.943  | 1680.9952 | 31.1             | 3      | 3.56  | 2.07        | GILLGAVHGIVESLFR                | LYT   | rep3      |
| 561.2804  | 1680.8177 | 1680.9952 | 105.6            | 3      | 1.66  | 0.6         | GILLGAVHGIVESLFR                | LYK   | rep2      |
| 1127.0717 | 3378.1915 | 3378.914  | 213.84           | 3      | 5.91  | 4.01        | IFSHMKPNSILGLSHGFLLGHLQSSGLDFPK | LYK   | rep3      |
| 1127.1488 | 3378.4229 | 3378.914  | 145.35           | 3      | 5.47  | 3.52        | IFSHMKPNSILGLSHGFLLGHLQSSGLDFPK | LYT   | rep2      |
| 1021.4418 | 3061.3018 | 3060.3672 | 305.41           | 3      | 4.67  | 2.28        | KGHSYSEIINESVIESVDSLNPFMHAR     | LYK   | rep1      |
| 1021.3716 | 3061.0913 | 3060.3672 | 236.6            | 3      | 3.71  | 1.71        | KGHSYSEIINESVIESVDSLNPFMHAR     | LYT   | rep3      |

**Matching Genes:**

[NP\\_001078309.1](#) (ketol-acid reductoisomerase [Arabidopsis thaliana])

**Protein Group 95****Expression Quality:**

| Group                 | Group Probability | Num Peptides | % Seq Coverage | Num Spectra |
|-----------------------|-------------------|--------------|----------------|-------------|
| Total (Non-Redundant) | 1                 | 4            | 17.77          | 14.0        |

**Peptides:**

| Observed | Mr(expt)  | Mr(calc)  | Mass Error (ppm) | Charge | Score | Score Delta | Peptide                             | Group | Replicate |
|----------|-----------|-----------|------------------|--------|-------|-------------|-------------------------------------|-------|-----------|
| 592.1202 | 1773.3372 | 1773.9714 | 357.51           | 3      | 4.58  | 2.44        | KLSSALSAASSACDHIR : +57.05000 (C13) | LYT   | rep2      |
| 592.2274 | 1773.6588 | 1773.9714 | 176.26           | 3      | 4.54  | 2.23        | KLSSALSAASSACDHIR : +57.05000 (C13) | LYK   | rep1      |
| 823.6116 | 1645.2076 | 1645.7985 | 359.08           | 2      | 3.38  | 1.78        | LSSALSAASSACDHIR : +57.05000 (C12)  | LYT   | rep1      |
| 549.6132 | 1645.816  | 1645.7985 | 10.61            | 3      | 2.56  | 1.2         | LSSALSAASSACDHIR : +57.05000 (C12)  | LYK   | rep2      |
| 827.6715 | 2479.991  | 2480.7002 | 285.86           | 3      | 3.37  | 1.45        | NVIIWGNHSSTQYPDVNHATVK              | LYT   | rep3      |

|          |           |           |       |   |      |      |                      |     |      |
|----------|-----------|-----------|-------|---|------|------|----------------------|-----|------|
| 667.6772 | 2000.0083 | 2000.4173 | 204.5 | 3 | 2.75 | 0.93 | VLVTGAAGQIGYALVPMIAR | LYT | rep2 |
|----------|-----------|-----------|-------|---|------|------|----------------------|-----|------|

**Matching Genes:**

[NP\\_199147.1](#) (malate dehydrogenase, cytosolic, putative [Arabidopsis thaliana])

**Protein Group 96**

**Expression Quality:**

| Group                 | Group Probability | Num Peptides | % Seq Coverage | Num Spectra |
|-----------------------|-------------------|--------------|----------------|-------------|
| Total (Non-Redundant) | 1                 | 3            | 15.22          | 13.0        |

**Peptides:**

| Observed | Mr(expt)  | Mr(calc)  | Mass Error (ppm) | Charge | Score | Score Delta | Peptide                                 | Group | Replicate |
|----------|-----------|-----------|------------------|--------|-------|-------------|-----------------------------------------|-------|-----------|
| 1147.899 | 2293.7823 | 2294.5788 | 347.16           | 2      | 4.34  | 2.4         | AFVEQYYHILHQSPGLVHR                     | LYK   | rep1      |
| 765.7128 | 2294.1148 | 2294.5788 | 202.22           | 3      | 3.77  | 1.86        | AFVEQYYHILHQSPGLVHR                     | LYT   | rep3      |
| 1345.681 | 4034.0196 | 4036.2663 | 556.64           | 3      | 6.62  | 4.12        | LTAPPAEPAARPEASAHENVPNSSSHVDVEDDGHSIYVR | LYK   | rep3      |
| 735.074  | 1468.1324 | 1468.6654 | 362.94           | 2      | 3.01  | 1.22        | NFGAIKHEGIQVR                           | LYK   | rep1      |
| 735.1712 | 1468.3267 | 1468.6654 | 230.62           | 2      | 2.2   | 0.18        | NFGAIKHEGIQVR                           | LYT   | rep1      |

**Matching Genes:**

[NP\\_200906.2](#) (nuclear transport factor 2 (NTF2) family protein / RNA recognition motif (RRM)-containing protein [Arabidopsis thaliana])

**Protein Group 97**

**Expression Quality:**

| Group                 | Group Probability | Num Peptides | % Seq Coverage | Num Spectra |
|-----------------------|-------------------|--------------|----------------|-------------|
| Total (Non-Redundant) | 1                 | 4            | 33.48          | 24.0        |

**Peptides:**

| Observed  | Mr(expt)  | Mr(calc)  | Mass Error (ppm) | Charge | Score | Score Delta | Peptide                         | Group | Replicate |
|-----------|-----------|-----------|------------------|--------|-------|-------------|---------------------------------|-------|-----------|
| 800.7798  | 1599.544  | 1599.7561 | 132.59           | 2      | 3.58  | 1.76        | FNGGGHVNHSIFWK                  | LYK   | rep3      |
| 800.8535  | 1599.6914 | 1599.7561 | 40.41            | 2      | 3.33  | 1.74        | FNGGGHVNHSIFWK                  | LYT   | rep1      |
| 857.7185  | 2570.132  | 2570.7385 | 235.91           | 3      | 1.87  | 0.62        | HHQAYVTNYYNNALEQLDQAVNK         | LYT   | rep3      |
| 1110.2443 | 3327.7093 | 3328.5742 | 259.84           | 3      | 5.56  | 2.88        | HHQAYVTNYYNNALEQLDQAVNKGDASTVVK | LYT   | rep3      |
| 1110.2025 | 3327.5841 | 3328.5742 | 297.47           | 3      | 4.7   | 2.58        | HHQAYVTNYYNNALEQLDQAVNKGDASTVVK | LYK   | rep2      |
| 1060.5897 | 3178.7457 | 3179.4634 | 225.72           | 3      | 2.69  | 1.21        | NLAPSEGGGEPKGSLSAIDAHFGSLEGLVK  | LYT   | rep1      |
| 1060.5094 | 3178.5047 | 3179.4634 | 301.51           | 3      | 1.73  | 0.19        | NLAPSEGGGEPKGSLSAIDAHFGSLEGLVK  | LYK   | rep2      |

**Matching Genes:**

[NP\\_001030670.1](#) (MSD1 (MANGANESE SUPEROXIDE DISMUTASE 1); manganese superoxide dismutase [Arabidopsis thaliana])

**Protein Group 98**

**Expression Quality:**

| Group                 | Group Probability | Num Peptides | % Seq Coverage | Num Spectra |
|-----------------------|-------------------|--------------|----------------|-------------|
| Total (Non-Redundant) | 1                 | 4            | 18.43          | 13.0        |

**Peptides:**

| Observed | Mr(expt)  | Mr(calc)  | Mass Error (ppm) | Charge | Score | Score Delta | Peptide                                    | Group | Replicate |
|----------|-----------|-----------|------------------|--------|-------|-------------|--------------------------------------------|-------|-----------|
| 749.7449 | 1497.4742 | 1497.6555 | 121.09           | 2      | 2.16  | 1.03        | ATTHPVVSDKLSDK                             | LYT   | rep2      |
| 749.746  | 1497.4764 | 1497.6555 | 119.62           | 2      | 1.79  | 0.51        | ATTHPVVSDKLSDK                             | LYK   | rep1      |
| 684.6586 | 2050.9522 | 2051.3481 | 193              | 3      | 3.86  | 1.42        | GPGTTIEFSITLIEQLFGK                        | LYK   | rep3      |
| 636.0721 | 1270.1285 | 1270.5024 | 294.35           | 2      | 2.76  | 1.49        | KATGYPVFMEK                                | LYT   | rep2      |
| 636.1138 | 1270.2119 | 1270.5024 | 228.63           | 2      | 1.56  | 0.6         | KATGYPVFMEK                                | LYK   | rep2      |
| 809.7064 | 2426.0958 | 2426.671  | 237.05           | 3      | 4.74  | 1.9         | RGGADVTVASVETQVGVDACHGIK : +57.05000 (C20) | LYT   | rep1      |
| 809.6388 | 2425.8929 | 2426.671  | 320.65           | 3      | 3.79  | 1.49        | RGGADVTVASVETQVGVDACHGIK : +57.05000 (C20) | LYK   | rep1      |

**Matching Genes:**



[NP\\_001030698.1](#) (catalytic [Arabidopsis thaliana])

---

**Protein Group 99**

**Expression Quality:**

| Group                 | Group Probability | Num Peptides | % Seq Coverage | Num Spectra |
|-----------------------|-------------------|--------------|----------------|-------------|
| Total (Non-Redundant) | 1                 | 3            | 6.93           | 9.0         |

**Peptides:**

| Observed  | Mr(expt)  | Mr(calc)  | Mass Error (ppm) | Charge | Score | Score Delta | Peptide                          | Group | Replicate |
|-----------|-----------|-----------|------------------|--------|-------|-------------|----------------------------------|-------|-----------|
| 1082.8177 | 3245.4298 | 3245.7392 | 95.35            | 3      | 6.87  | 4.41        | AVLDAATIAGLHPLHLIHETTATALAYGIYK  | LYT   | rep3      |
| 1082.8805 | 3245.618  | 3245.7392 | 37.35            | 3      | 5.46  | 3.38        | AVLDAATIAGLHPLHLIHETTATALAYGIYK  | LYK   | rep1      |
| 1134.5043 | 3400.4893 | 3401.9255 | 422.17           | 3      | 4.67  | 2.61        | RAVLDAATIAGLHPLHLIHETTATALAYGIYK | LYK   | rep1      |
| 1134.8182 | 3401.4312 | 3401.9255 | 145.3            | 3      | 3.87  | 2.12        | RAVLDAATIAGLHPLHLIHETTATALAYGIYK | LYT   | rep3      |
| 770.2467  | 2307.7166 | 2307.6142 | 44.37            | 3      | 1.92  | 0.82        | VREFQVHESFPFSISLAWK              | LYK   | rep1      |

**Matching Genes:**

[NP\\_178110.3](#) (heat shock protein 70, putative / HSP70, putative [Arabidopsis thaliana])

---

**Protein Group 100**

**Expression Quality:**

| Group                 | Group Probability | Num Peptides | % Seq Coverage | Num Spectra |
|-----------------------|-------------------|--------------|----------------|-------------|
| Total (Non-Redundant) | 1                 | 4            | 21.94          | 12.0        |

**Peptides:**

| Observed | Mr(expt)  | Mr(calc)  | Mass Error (ppm) | Charge | Score | Score Delta | Peptide    | Group | Replicate |
|----------|-----------|-----------|------------------|--------|-------|-------------|------------|-------|-----------|
| 561.8291 | 1121.6426 | 1122.2795 | 567.52           | 2      | 2.35  | 0.62        | AVNALEQHIK | LYT   | rep2      |
| 561.8268 | 1121.638  | 1122.2795 | 571.65           | 2      | 1.73  | 0.21        | AVNALEQHIK | LYK   | rep2      |

|           |           |           |        |   |      |      |                              |     |      |
|-----------|-----------|-----------|--------|---|------|------|------------------------------|-----|------|
| 1012.9108 | 3035.7088 | 3036.407  | 229.93 | 3 | 5.13 | 3.25 | EGVSTAVSHGLWLNIPDYDAPTQLVKPK | LYT | rep2 |
| 1012.7661 | 3035.2749 | 3036.407  | 372.84 | 3 | 4.51 | 2.27 | EGVSTAVSHGLWLNIPDYDAPTQLVKPK | LYK | rep2 |
| 590.2775  | 1767.8089 | 1767.8988 | 50.83  | 3 | 2.07 | 0.41 | IHVPEGYDYELYNR               | LYK | rep2 |
| 590.0986  | 1767.2724 | 1767.8988 | 354.3  | 3 | 1.68 | 0.43 | IHVPEGYDYELYNR               | LYT | rep1 |
| 109.14969 | 3271.4674 | 3272.7436 | 389.97 | 3 | 3.88 | 1.2  | NLDFLEMWRPFLQPYHLIIVQDGDPSK  | LYK | rep3 |
| 1091.6644 | 3271.9698 | 3272.7436 | 236.45 | 3 | 3.56 | 1.37 | NLDFLEMWRPFLQPYHLIIVQDGDPSK  | LYT | rep2 |

**Matching Genes:**

[NP\\_197069.1](#) (RGP2 (Reversibly glycosylated polypeptide-3); DNA binding / alpha-1,4-glucan-protein synthase (UDP-forming) [Arabidopsis thaliana])

**Protein Group 101**

**Expression Quality:**

| Group                 | Group Probability | Num Peptides | % Seq Coverage | Num Spectra |
|-----------------------|-------------------|--------------|----------------|-------------|
| Total (Non-Redundant) | 1                 | 4            | 17.81          | 10.0        |

**Peptides:**

| Observed  | Mr(expt)  | Mr(calc)  | Mass Error (ppm) | Charge | Score | Score Delta | Peptide                                               | Group | Replicate |
|-----------|-----------|-----------|------------------|--------|-------|-------------|-------------------------------------------------------|-------|-----------|
| 490.4415  | 1468.3009 | 1468.6409 | 231.46           | 3      | 4.08  | 0.22        | AMGHHVTVISSSDK                                        | LYK   | rep3      |
| 490.6365  | 1468.8861 | 1468.6409 | 167.01           | 3      | 3.8   | 0.12        | AMGHHVTVISSSDK                                        | LYT   | rep3      |
| 533.1659  | 1596.4742 | 1596.8138 | 212.69           | 3      | 4.04  | 0.22        | AMGHHVTVISSDKK                                        | LYK   | rep3      |
| 676.5537  | 1351.0918 | 1351.6234 | 393.28           | 2      | 1.74  | 0.58        | GGILGLGGVGHMGVK                                       | LYT   | rep3      |
| 1206.0658 | 3615.1739 | 3616.249  | 297.29           | 3      | 3.37  | 1.34        | IPEGMAVEQAAPLLCAGVTVYSPLSHFGLMASGLK : +57.05000 (C15) | LYK   | rep3      |

**Matching Genes:**

[NP\\_188576.1](#) (CAD4 (CINNAMYL ALCOHOL DEHYDROGENASE 4); cinnamyl-alcohol dehydrogenase [Arabidopsis thaliana])

**Protein Group 102****Expression Quality:**

| Group                 | Group Probability | Num Peptides | % Seq Coverage | Num Spectra |
|-----------------------|-------------------|--------------|----------------|-------------|
| Total (Non-Redundant) | 1                 | 4            | 30.57          | 9.0         |

**Peptides:**

| Observed  | Mr(expt)  | Mr(calc)  | Mass Error (ppm) | Charge | Score | Score Delta | Peptide                                   | Group | Replicate |
|-----------|-----------|-----------|------------------|--------|-------|-------------|-------------------------------------------|-------|-----------|
| 1189.8358 | 3566.484  | 3565.8589 | 175.3            | 3      | 5.4   | 2.99        | AEDSPAVTSTPLVVTEHPVEPTTELPVEHPEEK         | LYK   | rep3      |
| 1189.4532 | 3565.3363 | 3565.8589 | 146.56           | 3      | 3.8   | 2.16        | AEDSPAVTSTPLVVTEHPVEPTTELPVEHPEEK         | LYT   | rep1      |
| 513.0127  | 1024.0098 | 1024.2174 | 202.69           | 2      | 1.43  | 0.46        | GLFDLGGK                                  | LYT   | rep1      |
| 1494.1014 | 4479.2808 | 4479.8393 | 124.67           | 3      | 3.19  | 1.11        | LPGHHDEKAEDSPAVTSTPLVVTEHPVEPTTELPVEHPEEK | LYK   | rep1      |
| 1134.1058 | 3399.294  | 3400.6257 | 391.6            | 3      | 2.98  | 1.27        | TAEDDVPVSTTIPVPVSESVVEHDHPEEEKK           | LYT   | rep1      |
| 1134.0302 | 3399.067  | 3400.6257 | 458.37           | 3      | 2.4   | 0.87        | TAEDDVPVSTTIPVPVSESVVEHDHPEEEKK           | LYK   | rep2      |

**Matching Genes:**

[NP\\_173468.1](#) (COR47 (cold regulated 47) [Arabidopsis thaliana])

**Protein Group 103****Expression Quality:**

| Group                 | Group Probability | Num Peptides | % Seq Coverage | Num Spectra |
|-----------------------|-------------------|--------------|----------------|-------------|
| Total (Non-Redundant) | 1                 | 5            | 13.05          | 14.0        |

**Peptides:**

| Observed  | Mr(expt)  | Mr(calc)  | Mass Error (ppm) | Charge | Score | Score Delta | Peptide                             | Group | Replicate |
|-----------|-----------|-----------|------------------|--------|-------|-------------|-------------------------------------|-------|-----------|
| 1431.8108 | 2861.606  | 2863.0605 | 508.04           | 2      | 3.72  | 1.8         | ATNGDTFLGGEDFDNALLDFLVNEFK          | LYK   | rep3      |
| 1264.9879 | 3791.9403 | 3792.0908 | 39.7             | 3      | 1.77  | 0.59        | ATNGDTFLGGEDFDNALLDFLVNEFKTTEGIDLAK | LYT   | rep1      |
| 1229.6253 | 2457.2349 | 2456.8828 | 143.31           | 2      | 1.87  | 0.53        | ELLLLDVTPLSLGIETLGGVFTR             | LYT   | rep2      |

|          |           |           |        |   |      |      |                    |     |      |
|----------|-----------|-----------|--------|---|------|------|--------------------|-----|------|
| 687.8888 | 2060.6429 | 2061.2151 | 277.59 | 3 | 2.14 | 0.62 | NTADTTIYSIEKSLGEYR | LYT | rep3 |
| 539.0298 | 1614.0659 | 1613.8225 | 150.81 | 3 | 3.49 | 1.27 | SRFETLVNHLIER      | LYK | rep1 |
| 539.0123 | 1614.0135 | 1613.8225 | 118.36 | 3 | 3.34 | 0.71 | SRFETLVNHLIER      | LYT | rep3 |

**Matching Genes:**

[NP\\_196521.1](#) (mtHSC70-2 (HEAT SHOCK PROTEIN 70); ATP binding / unfolded protein binding [Arabidopsis thaliana])

**Protein Group 104**

**Expression Quality:**

| Group                 | Group Probability | Num Peptides | % Seq Coverage | Num Spectra |
|-----------------------|-------------------|--------------|----------------|-------------|
| Total (Non-Redundant) | 1                 | 6            | 18.9           | 20.0        |

**Peptides:**

| Observed | Mr(expt)  | Mr(calc)  | Mass Error (ppm) | Charge | Score | Score Delta | Peptide                  | Group | Replicate |
|----------|-----------|-----------|------------------|--------|-------|-------------|--------------------------|-------|-----------|
| 854.1445 | 2559.4101 | 2559.8386 | 167.39           | 3      | 1.75  | 0.26        | EKLVDVTNGAGDAFVGGFSLVHGK | LYT   | rep1      |
| 690.5606 | 1379.1055 | 1378.5796 | 381.5            | 2      | 2.06  | 0.38        | HLPYDEMSQK               | LYT   | rep3      |
| 607.5786 | 1213.1416 | 1213.3874 | 202.58           | 2      | 1.79  | 0.07        | KPENWALVEK               | LYT   | rep3      |
| 607.5501 | 1213.0845 | 1213.3874 | 249.66           | 2      | 1.73  | 0.31        | KPENWALVEK               | LYK   | rep3      |
| 527.9148 | 1053.814  | 1054.3298 | 489.24           | 2      | 1.65  | 0.5         | KYPVIPLPK                | LYK   | rep2      |
| 527.898  | 1053.7803 | 1054.3298 | 521.2            | 2      | 1.25  | 0.23        | KYPVIPLPK                | LYT   | rep3      |
| 821.0049 | 2459.9912 | 2460.7922 | 325.53           | 3      | 2.91  | 0.93        | LNNAILAEDKHLPMYDEMSQK    | LYK   | rep1      |
| 821.0458 | 2460.1139 | 2460.7922 | 275.67           | 3      | 2.39  | 0.43        | LNNAILAEDKHLPMYDEMSQK    | LYT   | rep2      |
| 768.4415 | 2302.3011 | 2302.5513 | 108.64           | 3      | 2.83  | 1.29        | LVDTNGAGDAFVGGFSLVHGK    | LYT   | rep3      |
| 768.4794 | 2302.4146 | 2302.5513 | 59.34            | 3      | 2.72  | 0.97        | LVDTNGAGDAFVGGFSLVHGK    | LYK   | rep2      |

**Matching Genes:**

[NP\\_187593.1](#) (ADK1 (ADENOSINE KINASE 1) [Arabidopsis thaliana])

---

**Protein Group 105****Expression Quality:**

| Group                 | Group Probability | Num Peptides | % Seq Coverage | Num Spectra |
|-----------------------|-------------------|--------------|----------------|-------------|
| Total (Non-Redundant) | 1                 | 4            | 19.81          | 18.0        |

**Peptides:**

| Observed  | Mr(expt)  | Mr(calc)  | Mass Error (ppm) | Charge | Score | Score Delta | Peptide                        | Group | Replicate |
|-----------|-----------|-----------|------------------|--------|-------|-------------|--------------------------------|-------|-----------|
| 913.8881  | 2738.6407 | 2739.1399 | 182.24           | 3      | 2.25  | 0.83        | IALIGLQSVSSPVAFHSLGEAVATVSK    | LYT   | rep1      |
| 1046.9374 | 3137.7887 | 3137.626  | 51.85            | 3      | 4.48  | 2.44        | MGSYLAVAAASANPPHFIHLVYKPPNGSVK | LYK   | rep3      |
| 1047.1727 | 3138.4947 | 3137.626  | 276.88           | 3      | 4.29  | 2.46        | MGSYLAVAAASANPPHFIHLVYKPPNGSVK | LYT   | rep1      |
| 1014.745  | 3041.2115 | 3042.3266 | 366.54           | 3      | 2.62  | 0.87        | VDAHLSGLLAQVSSEEDFTGKPGQSTVLR  | LYT   | rep1      |
| 1014.8704 | 3041.5876 | 3042.3266 | 242.92           | 3      | 2.25  | 0.89        | VDAHLSGLLAQVSSEEDFTGKPGQSTVLR  | LYK   | rep1      |
| 971.4931  | 1940.9705 | 1941.2457 | 141.78           | 2      | 3.61  | 2.14        | VQWMHIDMAGPVWNEK               | LYT   | rep1      |

**Matching Genes:**

[NP\\_179997.1](#) (cytosol aminopeptidase [Arabidopsis thaliana])

---

**Protein Group 106****Expression Quality:**

| Group                 | Group Probability | Num Peptides | % Seq Coverage | Num Spectra |
|-----------------------|-------------------|--------------|----------------|-------------|
| Total (Non-Redundant) | 1                 | 3            | 19.63          | 16.0        |

**Peptides:**

| Observed  | Mr(expt)  | Mr(calc)  | Mass Error (ppm) | Charge | Score | Score Delta | Peptide                      | Group | Replicate |
|-----------|-----------|-----------|------------------|--------|-------|-------------|------------------------------|-------|-----------|
| 1086.9635 | 3257.867  | 3256.7222 | 351.54           | 3      | 6.39  | 4.04        | IPVLIHNGKPVNESIIQVQYIDEVWSHK | LYT   | rep3      |
| 1086.0372 | 3255.0882 | 3256.7222 | 501.71           | 3      | 5.08  | 2.95        | IPVLIHNGKPVNESIIQVQYIDEVWSHK | LYK   | rep2      |
| 545.6943  | 1634.0595 | 1632.9756 | 663.79           | 3      | 3.58  | 1.41        | NKSPLLLQMNPIHK               | LYT   | rep3      |

|          |           |           |        |   |      |      |                |     |      |
|----------|-----------|-----------|--------|---|------|------|----------------|-----|------|
| 545.1158 | 1632.3241 | 1632.9756 | 398.97 | 3 | 3.22 | 0.8  | NKSPLLLQMNPIHK | LYK | rep2 |
| 507.3972 | 1519.168  | 1518.8724 | 194.6  | 3 | 2.96 | 1.19 | SPLLLQMNPIHKK  | LYK | rep2 |
| 507.2971 | 1518.8677 | 1518.8724 | 3.11   | 3 | 2.87 | 1.37 | SPLLLQMNPIHKK  | LYT | rep3 |

**Matching Genes:**

[NP\\_565178.1](#) (ATGSTU19 (GLUTATHIONE TRANSFERASE 8); glutathione transferase [Arabidopsis thaliana])

**Protein Group 107**

**Expression Quality:**

| Group                 | Group Probability | Num Peptides | % Seq Coverage | Num Spectra |
|-----------------------|-------------------|--------------|----------------|-------------|
| Total (Non-Redundant) | 1                 | 3            | 46.98          | 17.0        |

**Peptides:**

| Observed  | Mr(expt)  | Mr(calc)  | Mass Error (ppm) | Charge | Score | Score Delta | Peptide                               | Group | Replicate |
|-----------|-----------|-----------|------------------|--------|-------|-------------|---------------------------------------|-------|-----------|
| 952.4606  | 1902.9056 | 1904.066  | 609.45           | 2      | 4.28  | 2.09        | EAFSLFDKDGDCITTK : +57.05000 (C13)    | LYT   | rep1      |
| 952.8371  | 1903.6585 | 1904.066  | 214.02           | 2      | 2.15  | 0.71        | EAFSLFDKDGDCITTK : +57.05000 (C13)    | LYK   | rep2      |
| 1346.6083 | 4036.8014 | 4038.4009 | 396.08           | 3      | 4.84  | 2.64        | SLGQNPTEAELQDMINEVDADGNGTIDFPEFLNLMAK | LYK   | rep3      |
| 604.9989  | 1811.9732 | 1809.9803 | 1101.06          | 3      | 3.68  | 1.28        | VFDKQNGFISAAELR                       | LYT   | rep1      |
| 905.637   | 1809.2583 | 1809.9803 | 398.9            | 2      | 3.29  | 1.14        | VFDKQNGFISAAELR                       | LYK   | rep3      |

**Matching Genes:**

[NP\\_176814.1](#) (CAM4 (CALMODULIN 4); calcium ion binding [Arabidopsis thaliana])

**Protein Group 108**

**Expression Quality:**

| Group                 | Group Probability | Num Peptides | % Seq Coverage | Num Spectra |
|-----------------------|-------------------|--------------|----------------|-------------|
| Total (Non-Redundant) | 1                 | 2            | 11.64          | 7.0         |

**Peptides:**

| Observed  | Mr(expt)  | Mr(calc)  | Mass Error (ppm) | Charge | Score | Score Delta | Peptide                                           | Group | Replicate |
|-----------|-----------|-----------|------------------|--------|-------|-------------|---------------------------------------------------|-------|-----------|
| 1114.3627 | 3340.0645 | 3341.7878 | 515.66           | 3      | 5.36  | 2.58        | DHVLNHL SIPAACFTHPEISMVGLTEPQAR : +57.05000 (C13) | LYK   | rep3      |
| 1296.017  | 3885.0274 | 3886.4148 | 356.98           | 3      | 7.3   | 4.69        | MIYRPDNGEILGVHIFGLHAADLIHEASNAIALGTR              | LYT   | rep1      |
| 1296.5409 | 3886.5992 | 3886.4148 | 47.45            | 3      | 7.24  | 4.57        | MIYRPDNGEILGVHIFGLHAADLIHEASNAIALGTR              | LYK   | rep1      |

**Matching Genes:**

[NP\\_567487.1](#) (dihydrolipoamide dehydrogenase 2, plastidic / lipoamide dehydrogenase 2 (PTLPD2) [Arabidopsis thaliana])

**Protein Group 109****Expression Quality:**

| Group                 | Group Probability | Num Peptides | % Seq Coverage | Num Spectra |
|-----------------------|-------------------|--------------|----------------|-------------|
| Total (Non-Redundant) | 1                 | 3            | 16.26          | 31.0        |

**Peptides:**

| Observed | Mr(expt)  | Mr(calc)  | Mass Error (ppm) | Charge | Score | Score Delta | Peptide                                     | Group | Replicate |
|----------|-----------|-----------|------------------|--------|-------|-------------|---------------------------------------------|-------|-----------|
| 791.9083 | 2372.7015 | 2371.6371 | 448.82           | 3      | 4.17  | 2.35        | DLVLLSGAHTIGVSHCSSFTNR : +57.05000 (C16)LYT | rep1  |           |
| 792.2274 | 2373.6588 | 2371.6371 | 852.46           | 3      | 3.05  | 0.53        | DLVLLSGAHTIGVSHCSSFTNR : +57.05000 (C16)    | LYK   | rep3      |
| 774.8387 | 2321.4928 | 2322.6289 | 489.16           | 3      | 5.59  | 3.01        | IVQDFVSNHVS NAPSLAAALIR                     | LYK   | rep3      |
| 775.4047 | 2323.1905 | 2322.6289 | 241.8            | 3      | 3.84  | 1.49        | IVQDFVSNHVS NAPSLAAALIR                     | LYT   | rep1      |
| 417.3369 | 1248.9873 | 1248.4405 | 437.92           | 3      | 2.77  | 1.15        | MHFHDCFVR : +57.05000 (C6)                  | LYT   | rep3      |
| 626.0274 | 1250.0391 | 1248.4405 | 1280.44          | 2      | 2.36  | 0.83        | MHFHDCFVR : +57.05000 (C6)                  | LYK   | rep3      |

**Matching Genes:**

[NP\\_172018.1](#) (RCI3 (RARE COLD INDUCIBLE GENE 3); peroxidase [Arabidopsis thaliana])

**Protein Group 110**

**Expression Quality:**

| Group                 | Group Probability | Num Peptides | % Seq Coverage | Num Spectra |
|-----------------------|-------------------|--------------|----------------|-------------|
| Total (Non-Redundant) | 1                 | 5            | 34.05          | 34.0        |

**Peptides:**

| Observed | Mr(expt)  | Mr(calc)  | Mass Error (ppm) | Charge | Score | Score Delta | Peptide                       | Group | Replicate |
|----------|-----------|-----------|------------------|--------|-------|-------------|-------------------------------|-------|-----------|
| 535.732  | 1069.4483 | 1068.2303 | 1140.15          | 2      | 1.98  | 0.41        | EKLPGYHPK                     | LYK   | rep3      |
| 535.387  | 1068.7583 | 1068.2303 | 494.28           | 2      | 1.93  | 0.38        | EKLPGYHPK                     | LYT   | rep1      |
| 513.0127 | 1024.0098 | 1024.2174 | 202.69           | 2      | 1.43  | 0.46        | GLFDFLGKK                     | LYT   | rep1      |
| 907.4315 | 2719.2711 | 2720.0503 | 286.47           | 3      | 2.71  | 0.77        | KPEDGS AVAAAPVVVPPPVVEEAHPVEK | LYK   | rep2      |
| 907.4443 | 2719.3095 | 2720.0503 | 272.33           | 3      | 2.67  | 0.65        | KPEDGS AVAAAPVVVPPPVVEEAHPVEK | LYT   | rep3      |
| 632.3482 | 1262.6807 | 1263.4016 | 570.6            | 2      | 2.53  | 1.36        | VHISEPEPEVK                   | LYT   | rep3      |
| 632.6136 | 1263.2115 | 1263.4016 | 150.5            | 2      | 2.29  | 1.06        | VHISEPEPEVK                   | LYK   | rep2      |
| 700.8933 | 2099.6565 | 2100.3376 | 324.32           | 3      | 3.73  | 1.88        | VHISEPEPEVKHESLLEK            | LYK   | rep1      |
| 700.9617 | 2099.8615 | 2100.3376 | 226.68           | 3      | 3.51  | 1.65        | VHISEPEPEVKHESLLEK            | LYT   | rep2      |

**Matching Genes:**

[NP\\_177745.1](#) (ERD14 (EARLY RESPONSE TO DEHYDRATION 14) [Arabidopsis thaliana])

**Protein Group 111****Expression Quality:**

| Group                 | Group Probability | Num Peptides | % Seq Coverage | Num Spectra |
|-----------------------|-------------------|--------------|----------------|-------------|
| Total (Non-Redundant) | 1                 | 3            | 9.25           | 18.0        |

**Peptides:**

| Observed | Mr(expt)  | Mr(calc)  | Mass Error (ppm) | Charge | Score | Score Delta | Peptide                                               | Group | Replicate |
|----------|-----------|-----------|------------------|--------|-------|-------------|-------------------------------------------------------|-------|-----------|
| 765.5428 | 2293.6051 | 2293.5884 | 7.27             | 3      | 5.17  | 2.36        | HDFIVVEFYAPWCGHCQK : +57.05000 (C13); +57.05000 (C16) | LYK   | rep2      |
| 765.1467 | 2292.4167 | 2293.5884 | 510.85           | 3      | 4.28  | 1.7         | HDFIVVEFYAPWCGHCQK : +57.05000 (C13); +57.05000 (C16) | LYT   | rep1      |



|           |           |           |        |   |      |     |                                                     |     |      |
|-----------|-----------|-----------|--------|---|------|-----|-----------------------------------------------------|-----|------|
| 529.2235  | 1584.6471 | 1584.8164 | 106.85 | 3 | 4.29 | 1.9 | LFKPFDELFDVSK                                       | LYT | rep1 |
| 1011.3025 | 2020.5894 | 2022.3157 | 853.64 | 2 | 2.9  | 0   | NVLIEFYAPWCGHCQK : +57.05000 (C11); +57.05000 (C14) | LYT | rep1 |
| 1011.6129 | 2021.2102 | 2022.3157 | 546.64 | 2 | 2.27 | 0   | NVLIEFYAPWCGHCQK : +57.05000 (C11); +57.05000 (C14) | LYK | rep2 |

**Matching Genes:**

[NP\\_177875.1](#) (ATPDIL1-2 (PDI-LIKE 1-2); protein disulfide isomerase [Arabidopsis thaliana])

**Protein Group 112**

**Expression Quality:**

| Group                 | Group Probability | Num Peptides | % Seq Coverage | Num Spectra |
|-----------------------|-------------------|--------------|----------------|-------------|
| Total (Non-Redundant) | 1                 | 5            | 13.47          | 14.0        |

**Peptides:**

| Observed  | Mr(expt)  | Mr(calc)  | Mass Error (ppm) | Charge | Score | Score Delta | Peptide                        | Group | Replicate |
|-----------|-----------|-----------|------------------|--------|-------|-------------|--------------------------------|-------|-----------|
| 736.3215  | 2205.9411 | 2206.487  | 247.42           | 3      | 3.47  | 1.33        | ILSQDKEHFAEMAVDAVFR            | LYK   | rep1      |
| 736.3036  | 2205.8873 | 2206.487  | 271.82           | 3      | 3.07  | 1.64        | ILSQDKEHFAEMAVDAVFR            | LYT   | rep2      |
| 764.7     | 1527.3843 | 1527.798  | 270.76           | 2      | 3     | 1.52        | KIIGHGINCFVNR : +57.05000 (C9) | LYK   | rep2      |
| 510.2162  | 1527.6251 | 1527.798  | 113.17           | 3      | 2.77  | 1.07        | KIIGHGINCFVNR : +57.05000 (C9) | LYT   | rep2      |
| 382.9681  | 1145.8809 | 1145.2732 | 530.67           | 3      | 2.06  | 0.32        | KSHAIEAFSR                     | LYK   | rep1      |
| 1107.8739 | 3320.5982 | 3321.6599 | 319.62           | 3      | 2.27  | 0.61        | QLIYNFPEELFADAGILAIEHADFEGER   | LYK   | rep3      |
| 509.5738  | 1017.1319 | 1017.1003 | 31.07            | 2      | 1.54  | 0.43        | SHAIEAFSR                      | LYT   | rep1      |

**Matching Genes:**

[NP\\_197589.1](#) (chaperonin, putative [Arabidopsis thaliana])

**Protein Group 113**

**Expression Quality:**

| Group                 | Group Probability | Num Peptides | % Seq Coverage | Num Spectra |
|-----------------------|-------------------|--------------|----------------|-------------|
| Total (Non-Redundant) | 1                 | 4            | 14.54          | 5.0         |

**Peptides:**

| Observed  | Mr(expt)  | Mr(calc)  | Mass Error (ppm) | Charge | Score | Score Delta | Peptide                            | Group | Replicate |
|-----------|-----------|-----------|------------------|--------|-------|-------------|------------------------------------|-------|-----------|
| 1212.8031 | 3635.3858 | 3636.8672 | 407.31           | 3      | 3.99  | 2.31        | GNAAFSSGDFNSAVNHFTDAINLTPTNHVLFNSR | LYT   | rep1      |
| 622.4075  | 1242.7994 | 1243.5287 | 586.49           | 2      | 1.51  | 0.35        | HMQNPMMNK                          | LYT   | rep1      |
| 712.347   | 2134.0177 | 2133.3262 | 324.14           | 3      | 3.37  | 1.8         | LGA AHLGLNQFDEAVEAYSK              | LYT   | rep1      |
| 676.8507  | 2027.5286 | 2028.1484 | 305.59           | 3      | 3.42  | 1.92        | SAAHASLNHYDEALSDAKK                | LYT   | rep3      |

**Matching Genes:**

[NP\\_176461.1](#) (stress-inducible protein, putative [Arabidopsis thaliana])

**Protein Group 114**

**Expression Quality:**

| Group                 | Group Probability | Num Peptides | % Seq Coverage | Num Spectra |
|-----------------------|-------------------|--------------|----------------|-------------|
| Total (Non-Redundant) | 1                 | 2            | 15.97          | 24.0        |

**Peptides:**

| Observed  | Mr(expt)  | Mr(calc)  | Mass Error (ppm) | Charge | Score | Score Delta | Peptide                                               | Group | Replicate |
|-----------|-----------|-----------|------------------|--------|-------|-------------|-------------------------------------------------------|-------|-----------|
| 746.0665  | 2235.1761 | 2234.6113 | 252.75           | 3      | 5.98  | 3.94        | HAVGLVRPVSIAFEVIHSFR                                  | LYK   | rep3      |
| 745.9797  | 2234.9157 | 2234.6113 | 136.23           | 3      | 4.8   | 3.15        | HAVGLVRPVSIAFEVIHSFR                                  | LYT   | rep2      |
| 1332.8214 | 3995.4408 | 3995.4242 | 4.15             | 3      | 6.18  | 4.26        | SGVYTDSHCGSTPMDVNHAVLAVGYGVEDGVPYWLK : +57.05000 (C9) | LYT   | rep2      |
| 1332.6876 | 3995.0394 | 3995.4242 | 96.31            | 3      | 5.45  | 3.72        | SGVYTDSHCGSTPMDVNHAVLAVGYGVEDGVPYWLK : +57.05000 (C9) | LYK   | rep1      |

**Matching Genes:**

[NP\\_001032106.1](#) (AALP (ARABIDOPSIS ALEURAIN-LIKE PROTEASE); cysteine-type peptidase [Arabidopsis thaliana])

---

**Protein Group 115****Expression Quality:**

| Group                 | Group Probability | Num Peptides | % Seq Coverage | Num Spectra |
|-----------------------|-------------------|--------------|----------------|-------------|
| Total (Non-Redundant) | 1                 | 2            | 10.59          | 7.0         |

**Peptides:**

| Observed  | Mr(expt)  | Mr(calc)  | Mass Error (ppm) | Charge | Score | Score Delta | Peptide                                           | Group | Replicate |
|-----------|-----------|-----------|------------------|--------|-------|-------------|---------------------------------------------------|-------|-----------|
| 1105.1752 | 3312.502  | 3313.7743 | 383.94           | 3      | 4.86  | 2.83        | DHVLNHL SIPAACFTHPEISMVGLTEPQAK : +57.05000 (C13) | LYK   | rep3      |
| 1296.017  | 3885.0274 | 3886.4148 | 356.98           | 3      | 7.3   | 4.69        | MIYRPDNGEILGVHIFGLHAADLIHEASNAIALGTR              | LYT   | rep1      |
| 1296.5409 | 3886.5992 | 3886.4148 | 47.45            | 3      | 7.24  | 4.57        | MIYRPDNGEILGVHIFGLHAADLIHEASNAIALGTR              | LYK   | rep1      |

**Matching Genes:**

[NP\\_001078165.1](#) (LPD1 (LIPOAMIDE DEHYDROGENASE 1) [Arabidopsis thaliana])

---

**Protein Group 116****Expression Quality:**

| Group                 | Group Probability | Num Peptides | % Seq Coverage | Num Spectra |
|-----------------------|-------------------|--------------|----------------|-------------|
| Total (Non-Redundant) | 1                 | 4            | 14.53          | 9.0         |

**Peptides:**

| Observed  | Mr(expt)  | Mr(calc)  | Mass Error (ppm) | Charge | Score | Score Delta | Peptide                      | Group | Replicate |
|-----------|-----------|-----------|------------------|--------|-------|-------------|------------------------------|-------|-----------|
| 788.6923  | 1575.3689 | 1575.7695 | 254.22           | 2      | 3.45  | 2.1         | GKWSSPLIDNPAYK               | LYT   | rep1      |
| 619.6114  | 1855.8109 | 1855.1073 | 379.27           | 3      | 1.99  | 0.33        | LSHVYTAILKPDNEVR             | LYK   | rep3      |
| 743.9503  | 2228.8275 | 2229.4556 | 281.72           | 3      | 2.13  | 0.29        | SGEYVEHHLKFPPSPYDK           | LYT   | rep1      |
| 1068.9132 | 3203.7161 | 3204.4934 | 242.55           | 3      | 4.57  | 2.54        | YLRPQEAGWTPQGFDSESPYSIMFGPDK | LYK   | rep2      |
| 1069.0131 | 3204.0157 | 3204.4934 | 149.07           | 3      | 4.17  | 2.31        | YLRPQEAGWTPQGFDSESPYSIMFGPDK | LYT   | rep2      |

**Matching Genes:**[NP\\_200987.1](#) (calnexin 1 (CNX1) [Arabidopsis thaliana])**Protein Group 117****Expression Quality:**

| Group                 | Group Probability | Num Peptides | % Seq Coverage | Num Spectra |
|-----------------------|-------------------|--------------|----------------|-------------|
| Total (Non-Redundant) | 1                 | 3            | 8.04           | 8.0         |

**Peptides:**

| Observed  | Mr(expt)  | Mr(calc)  | Mass Error (ppm) | Charge | Score | Score Delta | Peptide                              | Group | Replicate |
|-----------|-----------|-----------|------------------|--------|-------|-------------|--------------------------------------|-------|-----------|
| 1264.7943 | 3791.3595 | 3792.1487 | 208.12           | 3      | 5.35  | 3.06        | AKGNAAFSSGDFTTAINHFTEAIALAPTNHVLFNSR | LYT   | rep1      |
| 1264.3043 | 3789.8895 | 3792.1487 | 595.75           | 3      | 4.38  | 2.36        | AKGNAAFSSGDFTTAINHFTEAIALAPTNHVLFNSR | LYK   | rep3      |
| 1198.8793 | 3593.6143 | 3592.8974 | 199.53           | 3      | 4.47  | 2.28        | GNAAFSSGDFTTAINHFTEAIALAPTNHVLFNSR   | LYT   | rep3      |
| 1198.2303 | 3591.6676 | 3592.8974 | 342.31           | 3      | 3.67  | 2.08        | GNAAFSSGDFTTAINHFTEAIALAPTNHVLFNSR   | LYK   | rep2      |
| 616.0124  | 1230.0091 | 1229.5021 | 412.37           | 2      | 2.29  | 0.57        | HMQNPMVMNK                           | LYT   | rep1      |
| 615.8992  | 1229.7827 | 1229.5021 | 228.29           | 2      | 1.3   | 0.15        | HMQNPMVMNK                           | LYK   | rep2      |

**Matching Genes:**[NP\\_172691.1](#) (stress-inducible protein, putative [Arabidopsis thaliana])**Protein Group 118****Expression Quality:**

| Group                 | Group Probability | Num Peptides | % Seq Coverage | Num Spectra |
|-----------------------|-------------------|--------------|----------------|-------------|
| Total (Non-Redundant) | 1                 | 4            | 15.73          | 14.0        |

**Peptides:**

| Observed | Mr(expt) | Mr(calc) | Mass Error (ppm) | Charge | Score | Score Delta | Peptide | Group | Replicate |
|----------|----------|----------|------------------|--------|-------|-------------|---------|-------|-----------|
|----------|----------|----------|------------------|--------|-------|-------------|---------|-------|-----------|

|           |           |           |        |   |      |      |                                                    |     |      |
|-----------|-----------|-----------|--------|---|------|------|----------------------------------------------------|-----|------|
| 873.9756  | 1745.9356 | 1746.9242 | 565.91 | 2 | 2.81 | 1.52 | GHSLQYFTTHTDLVK                                    | LYT | rep3 |
| 583.4121  | 1747.2129 | 1746.9242 | 165.24 | 3 | 2.77 | 1.41 | GHSLQYFTTHTDLVK                                    | LYK | rep2 |
| 952.1649  | 1902.3142 | 1903.1106 | 418.44 | 2 | 3.49 | 1.88 | GHSLQYFTTHTDLVKR                                   | LYK | rep1 |
| 951.9129  | 1901.8101 | 1903.1106 | 683.35 | 2 | 3.44 | 1.5  | GHSLQYFTTHTDLVKR                                   | LYT | rep2 |
| 1200.9926 | 3599.9542 | 3600.9585 | 278.89 | 3 | 3.49 | 1.27 | TAWHEELIDRVEQTGVDALEINFSCPHGMPER : +57.05000 (C24) | LYK | rep1 |
| 754.611   | 2260.8094 | 2261.4747 | 294.18 | 3 | 2.32 | 0.73 | TLRPEPCVEGYSTPGGYSYK : +57.05000 (C7)              | LYT | rep3 |

**Matching Genes:**

[NP\\_188408.1](#) (dihydroorotate dehydrogenase family protein / dihydroorotate oxidase family protein [Arabidopsis thaliana])

**Protein Group 119**

**Expression Quality:**

| Group                 | Group Probability | Num Peptides | % Seq Coverage | Num Spectra |
|-----------------------|-------------------|--------------|----------------|-------------|
| Total (Non-Redundant) | 1                 | 5            | 20.1           | 8.0         |

**Peptides:**

| Observed | Mr(expt)  | Mr(calc)  | Mass Error (ppm) | Charge | Score | Score Delta | Peptide                   | Group | Replicate |
|----------|-----------|-----------|------------------|--------|-------|-------------|---------------------------|-------|-----------|
| 489.5175 | 1465.5289 | 1465.637  | 73.73            | 3      | 2.25  | 0.71        | DKDLAHIEEHMK              | LYT   | rep3      |
| 965.9958 | 2894.9641 | 2895.2588 | 101.79           | 3      | 1.91  | 0.32        | EDLSKLYFGNFQILDINGSTCFLTR | LYT   | rep2      |
| 470.2724 | 1407.7937 | 1407.4527 | 242.26           | 3      | 1.78  | 0.41        | GGDVSWHIHDER              | LYT   | rep3      |
| 772.5227 | 1543.0298 | 1543.7308 | 454.1            | 2      | 3.06  | 1.4         | KTALYDFHVAHGK             | LYK   | rep3      |
| 657.8036 | 1970.3873 | 1970.3678 | 9.9              | 3      | 3.05  | 0.67        | SLLALQGPLAAPVLQHLTK       | LYT   | rep1      |
| 657.9628 | 1970.8648 | 1970.3678 | 252.26           | 3      | 1.84  | 0.63        | SLLALQGPLAAPVLQHLTK       | LYK   | rep1      |

**Matching Genes:**

[NP\\_172650.1](#) (aminomethyltransferase, putative [Arabidopsis thaliana])

**Protein Group 120****Expression Quality:**

| Group                 | Group Probability | Num Peptides | % Seq Coverage | Num Spectra |
|-----------------------|-------------------|--------------|----------------|-------------|
| Total (Non-Redundant) | 1                 | 4            | 16.15          | 23.0        |

**Peptides:**

| Observed  | Mr(expt)  | Mr(calc)  | Mass Error (ppm) | Charge | Score | Score Delta | Peptide                 | Group | Replicate |
|-----------|-----------|-----------|------------------|--------|-------|-------------|-------------------------|-------|-----------|
| 1293.8387 | 2585.6617 | 2586.4597 | 308.55           | 2      | 3.51  | 1.18        | DAAAEDEEDDDVDFGEETEEEEK | LYK   | rep3      |
| 375.935   | 1124.7815 | 1124.2954 | 432.38           | 3      | 2.95  | 0.74        | KLDEHLLTR               | LYT   | rep2      |
| 375.9863  | 1124.9355 | 1124.2954 | 569.34           | 3      | 2.56  | 0.6         | KLDEHLLTR               | LYK   | rep1      |
| 499.1906  | 996.3656  | 996.1225  | 244.1            | 2      | 2.26  | 0.55        | LDEHLLTR                | LYT   | rep1      |
| 499.1895  | 996.3633  | 996.1225  | 241.77           | 2      | 1.7   | 0.1         | LDEHLLTR                | LYK   | rep2      |
| 650.9792  | 1299.9427 | 1300.47   | 405.47           | 2      | 2.93  | 1.34        | WYNHIDALLR              | LYT   | rep3      |
| 651.0832  | 1300.1507 | 1300.47   | 245.52           | 2      | 2.78  | 1.16        | WYNHIDALLR              | LYK   | rep2      |

**Matching Genes:**

[NP\\_001077627.1](#) (elongation factor 1-beta / EF-1-beta [Arabidopsis thaliana])

**Protein Group 121****Expression Quality:**

| Group                 | Group Probability | Num Peptides | % Seq Coverage | Num Spectra |
|-----------------------|-------------------|--------------|----------------|-------------|
| Total (Non-Redundant) | 1                 | 5            | 39.64          | 11.0        |

**Peptides:**

| Observed | Mr(expt)  | Mr(calc)  | Mass Error (ppm) | Charge | Score | Score Delta | Peptide                  | Group | Replicate |
|----------|-----------|-----------|------------------|--------|-------|-------------|--------------------------|-------|-----------|
| 784.8012 | 1567.5867 | 1567.749  | 103.53           | 2      | 2.05  | 0.88        | IIGATNPAASEPGTIR         | LYT   | rep1      |
| 996.3474 | 2986.0188 | 2986.3066 | 96.4             | 3      | 2.23  | 0.97        | KEIALWFPDGPVNWQSSVHPVYET | LYT   | rep1      |
| 996.3864 | 2986.1356 | 2986.3066 | 57.28            | 3      | 1.79  | 0.87        | KEIALWFPDGPVNWQSSVHPVYET | LYK   | rep1      |

|          |           |           |         |   |      |      |                |     |      |
|----------|-----------|-----------|---------|---|------|------|----------------|-----|------|
| 687.1248 | 1372.2339 | 1370.4307 | 1315.84 | 2 | 3.25 | 1.25 | NVIHGSDSVESAR  | LYK | rep3 |
| 685.9221 | 1369.8286 | 1370.4307 | 439.28  | 2 | 1.26 | 0.06 | NVIHGSDSVESAR  | LYT | rep1 |
| 750.2617 | 1498.5078 | 1498.6036 | 63.91   | 2 | 2.38 | 0.86 | NVIHGSDSVESARK | LYK | rep3 |
| 514.411  | 1540.2096 | 1540.6357 | 276.62  | 3 | 1.66 | 0.25 | SFAEKHYEDLSSK  | LYT | rep1 |

**Matching Genes:**

[NP\\_567346.1](#) (NDPK1 (nucleoside diphosphate kinase 1); ATP binding / nucleoside diphosphate kinase [Arabidopsis thaliana])

**Protein Group 122**

**Expression Quality:**

| Group                 | Group Probability | Num Peptides | % Seq Coverage | Num Spectra |
|-----------------------|-------------------|--------------|----------------|-------------|
| Total (Non-Redundant) | 1                 | 5            | 24.27          | 28.0        |

**Peptides:**

| Observed | Mr(expt)  | Mr(calc)  | Mass Error (ppm) | Charge | Score | Score Delta | Peptide          | Group | Replicate |
|----------|-----------|-----------|------------------|--------|-------|-------------|------------------|-------|-----------|
| 638.8079 | 1275.6001 | 1276.4086 | 633.36           | 2      | 2.32  | 0.73        | HNNVIPNGHFK      | LYT   | rep3      |
| 639.0198 | 1276.024  | 1276.4086 | 301.31           | 2      | 2.15  | 0.75        | HNNVIPNGHFK      | LYK   | rep2      |
| 368.547  | 1102.6175 | 1102.25   | 333.43           | 3      | 2.09  | 0.52        | KHWQNYVK         | LYT   | rep2      |
| 368.5277 | 1102.5597 | 1102.25   | 280.94           | 3      | 1.92  | 0.41        | KHWQNYVK         | LYK   | rep1      |
| 464.8792 | 1391.6142 | 1390.6361 | 703.32           | 3      | 2.6   | 1.22        | KLAPTIGIAVDHR    | LYK   | rep1      |
| 464.6423 | 1390.9035 | 1390.6361 | 192.31           | 3      | 2.09  | 0.46        | KLAPTIGIAVDHR    | LYT   | rep1      |
| 768.4508 | 1534.886  | 1535.7786 | 581.16           | 2      | 2.73  | 1.02        | MKHNNVIPNGHFK    | LYK   | rep3      |
| 768.7005 | 1535.3853 | 1535.7786 | 256.07           | 2      | 2.6   | 1.11        | MKHNNVIPNGHFK    | LYT   | rep2      |
| 844.1621 | 1686.3086 | 1686.9598 | 386.02           | 2      | 1.77  | 0.69        | PTSGPLRPVVHGQTLK | LYT   | rep3      |

**Matching Genes:**

[NP\\_001030831.1](#) (ATBBC1 (bacterial basic conserved 1); structural constituent of ribosome [Arabidopsis thaliana])

**Protein Group 123****Expression Quality:**

| Group                 | Group Probability | Num Peptides | % Seq Coverage | Num Spectra |
|-----------------------|-------------------|--------------|----------------|-------------|
| Total (Non-Redundant) | 1                 | 3            | 23.02          | 16.0        |

**Peptides:**

| Observed | Mr(exp t) | Mr(calc ) | Mass Error (pp m) | Charge | Score   | Score Delta                                          | Peptide                                              | Group | Replicate |
|----------|-----------|-----------|-------------------|--------|---------|------------------------------------------------------|------------------------------------------------------|-------|-----------|
| 780.5397 | 1559.0638 | 1559.7505 | 440.27            | 2      | 3.28    | 1.86                                                 | HCVNSVSISFNPAK : +57.05000 (C2)                      | LYT   | rep1      |
| 780.4484 | 1558.8811 | 1559.7505 | 557.35            | 2      | 2.02    | 0.89                                                 | HCVNSVSISFNPAK : +57.05000 (C2)                      | LYK   | rep2      |
| 691.6179 | 2071.8303 | 2072.3347 | 243.39            | 3      | 4.47162 | RTEITCAACDGH LGHVFK : +57.05000 (C6); +57.05000 (C9) | LYK                                                  | rep3  |           |
| 691.6473 | 2071.9185 | 2072.3347 | 200.8             | 3      | 4.2     | 1.87                                                 | RTEITCAACDGH LGHVFK : +57.05000 (C6); +57.05000 (C9) | LYT   | rep2      |
| 958.5619 | 1915.1082 | 1916.1483 | 542.82            | 2      | 3.65    | 1.83                                                 | TEITCAACDGH LGHVFK : +57.05000 (C5); +57.05000 (C8)  | LYK   | rep2      |

**Matching Genes:**

[NP\\_192392.1](#) (methionine sulfoxide reductase domain-containing protein / SeIR domain-containing protein [Arabidopsis thaliana])

**Protein Group 124****Expression Quality:**

| Group                 | Group Probability | Num Peptides | % Seq Coverage | Num Spectra |
|-----------------------|-------------------|--------------|----------------|-------------|
| Total (Non-Redundant) | 1                 | 3            | 16.26          | 22.0        |

**Peptides:**



| Observed | Mr(expt)  | Mr(calc)  | Mass Error (ppm) | Charge | Score | Score Delta | Peptide                                     | Group | Replicate |
|----------|-----------|-----------|------------------|--------|-------|-------------|---------------------------------------------|-------|-----------|
| 786.6078 | 2356.7999 | 2357.6104 | 343.78           | 3      | 3.61  | 1.58        | DLVLLSGAHTIGVSHCSSFSNR : +57.05000 (C16)LYT | rep3  |           |
| 786.9022 | 2357.6832 | 2357.6104 | 30.88            | 3      | 3.57  | 1.29        | DLVLLSGAHTIGVSHCSSFSNR : +57.05000 (C16)    | LYK   | rep2      |
| 781.7723 | 2342.2935 | 2342.6633 | 157.85           | 3      | 4.93  | 1.96        | IVQDVVNQHINNAPSLAAGLIR                      | LYT   | rep1      |
| 417.3369 | 1248.9873 | 1248.4405 | 437.92           | 3      | 2.77  | 1.15        | MHFHDCFVR : +57.05000 (C6)                  | LYT   | rep3      |
| 626.0274 | 1250.0391 | 1248.4405 | 1280.44          | 2      | 2.36  | 0.83        | MHFHDCFVR : +57.05000 (C6)                  | LYK   | rep3      |

**Matching Genes:**

[NP\\_192868.1](#) (peroxidase, putative [Arabidopsis thaliana])

**Protein Group 125**

**Expression Quality:**

| Group                 | Group Probability | Num Peptides | % Seq Coverage | Num Spectra |
|-----------------------|-------------------|--------------|----------------|-------------|
| Total (Non-Redundant) | 1                 | 3            | 7.39           | 21.0        |

**Peptides:**

| Observed | Mr(expt)  | Mr(calc)  | Mass Error (ppm) | Charge | Score | Score Delta | Peptide                          | Group | Replicate |
|----------|-----------|-----------|------------------|--------|-------|-------------|----------------------------------|-------|-----------|
| 634.2124 | 1899.6137 | 1900.1116 | 262              | 3      | 4.4   | 2.72        | HNIGLPSQFAAASFHR                 | LYT   | rep3      |
| 634.4927 | 1900.4546 | 1900.1116 | 180.51           | 3      | 3.73  | 2.06        | HNIGLPSQFAAASFHR                 | LYK   | rep3      |
| 676.9723 | 2027.8934 | 2028.2845 | 192.84           | 3      | 4.92  | 2.77        | HNIGLPSQFAAASFHRK                | LYK   | rep3      |
| 677.0029 | 2027.9853 | 2028.2845 | 147.52           | 3      | 2.65  | 1.16        | HNIGLPSQFAAASFHRK                | LYT   | rep2      |
| 750.068  | 1498.1204 | 1498.7502 | 420.21           | 2      | 1.98  | 0.67        | VASVKPFGACFSTK : +57.05000 (C10) | LYK   | rep2      |
| 750.0711 | 1498.1265 | 1498.7502 | 416.13           | 2      | 1.61  | 0.26        | VASVKPFGACFSTK : +57.05000 (C10) | LYT   | rep2      |

**Matching Genes:**

[NP\\_171821.1](#) (extracellular dermal glycoprotein, putative / EDGP, putative [Arabidopsis thaliana])

**Protein Group 126**

**Expression Quality:**

| Group                 | Group Probability | Num Peptides | % Seq Coverage | Num Spectra |
|-----------------------|-------------------|--------------|----------------|-------------|
| Total (Non-Redundant) | 1                 | 4            | 16.6           | 13.0        |

**Peptides:**

| Observed  | Mr(expt)  | Mr(calc)  | Mass Error (ppm) | Charge | Score | Score Delta | Peptide                    | Group | Replicate |
|-----------|-----------|-----------|------------------|--------|-------|-------------|----------------------------|-------|-----------|
| 897.8472  | 2690.518  | 2690.926  | 151.62           | 3      | 3.49  | 2           | GPPGAPAPPAPLFAESSKPSSSSNQK | LYK   | rep3      |
| 897.6111  | 2689.8098 | 2690.926  | 414.82           | 3      | 1.7   | 0.35        | GPPGAPAPPAPLFAESSKPSSSSNQK | LYT   | rep3      |
| 718.7598  | 2153.2558 | 2152.4409 | 378.6            | 3      | 1.79  | 0.34        | QGMSAVFQQLSSGAVTSGLRK      | LYT   | rep1      |
| 388.8813  | 1163.6204 | 1163.2901 | 283.88           | 3      | 2.13  | 0.69        | RSDFFNHLK                  | LYT   | rep3      |
| 1068.3372 | 2134.6587 | 2135.3901 | 342.51           | 2      | 3.88  | 2.36        | SHYPLGPVWNASGKPASAPAK      | LYT   | rep3      |
| 1068.0701 | 2134.1245 | 2135.3901 | 592.67           | 2      | 3.63  | 2.01        | SHYPLGPVWNASGKPASAPAK      | LYK   | rep3      |

**Matching Genes:**

[NP\\_195175.1](#) (ATCAP1 (CYCLASE ASSOCIATED PROTEIN 1) [Arabidopsis thaliana])

**Protein Group 127****Expression Quality:**

| Group                 | Group Probability | Num Peptides | % Seq Coverage | Num Spectra |
|-----------------------|-------------------|--------------|----------------|-------------|
| Total (Non-Redundant) | 1                 | 4            | 27.27          | 15.0        |

**Peptides:**

| Observed | Mr(expt)  | Mr(calc)  | Mass Error (ppm) | Charge | Score | Score Delta | Peptide          | Group | Replicate |
|----------|-----------|-----------|------------------|--------|-------|-------------|------------------|-------|-----------|
| 608.0753 | 1821.2025 | 1821.0068 | 107.44           | 3      | 3.64  | 1.21        | AMKDAIEGMNGQDLDR | LYT   | rep2      |
| 451.9636 | 901.9115  | 902.0508  | 154.35           | 2      | 2.62  | 1.1         | GFGFVTFK         | LYT   | rep1      |
| 452.123  | 902.2304  | 902.0508  | 199.12           | 2      | 2.4   | 1.04        | GFGFVTFK         | LYK   | rep2      |
| 638.3841 | 1274.7525 | 1274.4261 | 256.07           | 2      | 3.23  | 1.19        | GFGFVTFKDEK      | LYK   | rep1      |
| 638.2784 | 1274.5411 | 1274.4261 | 90.17            | 2      | 3.05  | 1.26        | GFGFVTFKDEK      | LYT   | rep3      |

|          |           |          |        |   |      |      |                      |     |      |
|----------|-----------|----------|--------|---|------|------|----------------------|-----|------|
| 521.3903 | 1561.1473 | 1560.504 | 412.23 | 3 | 1.78 | 0.24 | SGGGGGYSGGGGSYGGGGGR | LYT | rep1 |
|----------|-----------|----------|--------|---|------|------|----------------------|-----|------|

**Matching Genes :**

[NP\\_179760.1](#) (ATGRP7 (COLD, CIRCADIAN RHYTHM, AND RNA BINDING 2); RNA binding / double-stranded DNA binding / single-stranded DNA binding [Arabidopsis thaliana])

---

**Protein Group 128**

**Expression Quality:**

| Group                 | Group Probability | Num Peptides | % Seq Coverage | Num Spectra |
|-----------------------|-------------------|--------------|----------------|-------------|
| Total (Non-Redundant) | 1                 | 4            | 10.65          | 14.0        |

**Peptides:**

| Observed  | Mr(expt)  | Mr(calc)  | Mass Error (ppm) | Charge | Score | Score Delta | Peptide                                    | Group | Replicate |
|-----------|-----------|-----------|------------------|--------|-------|-------------|--------------------------------------------|-------|-----------|
| 963.2933  | 2886.8565 | 2888.2483 | 481.87           | 3      | 4.07  | 1.39        | HETLLHQVPNTGMWECVDFYPVSK : +57.05000 (C16) | LYK   | rep2      |
| 1445.1465 | 2888.2774 | 2888.2483 | 10.08            | 2      | 2.68  | 0.98        | HETLLHQVPNTGMWECVDFYPVSK : +57.05000 (C16) | LYT   | rep3      |
| 567.0446  | 1698.1102 | 1697.8963 | 125.94           | 3      | 3.1   | 1.13        | ILVDHSIVEGFAQGGR                           | LYK   | rep2      |
| 716.5233  | 2146.5465 | 2147.5222 | 454.35           | 3      | 2.28  | 0.45        | STLANDVVKPIYGSFVPVLK                       | LYT   | rep3      |
| 1075.2681 | 2148.5205 | 2147.5222 | 464.88           | 2      | 1.91  | 0.88        | STLANDVVKPIYGSFVPVLK                       | LYK   | rep2      |
| 553.0752  | 1104.1348 | 1104.2195 | 76.68            | 2      | 1.83  | 0.18        | TAFHFQPEK                                  | LYK   | rep1      |

**Matching Genes:**

[NP\\_564798.1](#) (beta-fructosidase (BFRUCT3) / beta-fructofuranosidase / invertase, vacuolar [Arabidopsis thaliana])

---

**Protein Group 129****Expression Quality:**

| Group                 | Group Probability | Num Peptides | % Seq Coverage | Num Spectra |
|-----------------------|-------------------|--------------|----------------|-------------|
| Total (Non-Redundant) | 1                 | 3            | 29.41          | 17.0        |

**Peptides:**

| Observed  | Mr(expt)  | Mr(calc)  | Mass Error (ppm) | Charge | Score | Score Delta | Peptide                                  | Group | Replicate |
|-----------|-----------|-----------|------------------|--------|-------|-------------|------------------------------------------|-------|-----------|
| 1099.4496 | 3295.3253 | 3295.6704 | 104.72           | 3      | 3.04  | 0.56        | KLAGDQNLHFVETPALAPPEVHIDIADQQK           | LYK   | rep3      |
| 1226.7364 | 2451.4571 | 2451.7605 | 123.78           | 2      | 4.21  | 2.69        | KYEPTIGVEVHPLDFFTNC GK : +57.05000 (C19) | LYK   | rep1      |
| 818.2007  | 2451.5786 | 2451.7605 | 74.22            | 3      | 1.06  | 0.11        | KYEPTIGVEVHPLDFFTNC GK : +57.05000 (C19) | LYT   | rep2      |
| 588.3351  | 1761.9818 | 1761.9805 | 0.75             | 3      | 3.95  | 1.9         | SNYNFEKPFLYLAR                           | LYK   | rep1      |
| 588.4591  | 1762.3538 | 1761.9805 | 211.91           | 3      | 3.6   | 1.81        | SNYNFEKPFLYLAR                           | LYT   | rep1      |

**Matching Genes:**

[NP\\_197501.1](#) (RAN-1 (Ras-related GTP-binding nuclear protein 1); GTP binding [Arabidopsis thaliana])

---

**Protein Group 130****Expression Quality:**

| Group                 | Group Probability | Num Peptides | % Seq Coverage | Num Spectra |
|-----------------------|-------------------|--------------|----------------|-------------|
| Total (Non-Redundant) | 1                 | 3            | 22.46          | 26.0        |

**Peptides:**

| Observed | Mr(expt)  | Mr(calc)  | Mass Error (ppm) | Charge | Score | Score Delta | Peptide                                | Group | Replicate |
|----------|-----------|-----------|------------------|--------|-------|-------------|----------------------------------------|-------|-----------|
| 711.4905 | 1420.9654 | 1421.6674 | 493.82           | 2      | 2.84  | 1.25        | CHFVAIDIFTAK : +57.05000 (C1)          | LYT   | rep2      |
| 711.7522 | 1421.4888 | 1421.6674 | 125.63           | 2      | 2.23  | 0.98        | CHFVAIDIFTAK : +57.05000 (C1)          | LYK   | rep1      |
| 739.6539 | 2215.9383 | 2216.4419 | 227.21           | 3      | 5.38  | 3.19        | KLEDIVPSSHNC DVPHVNR : +57.05000 (C12) | LYK   | rep3      |

|          |           |           |        |   |      |      |                                        |     |      |
|----------|-----------|-----------|--------|---|------|------|----------------------------------------|-----|------|
| 739.8055 | 2216.3931 | 2216.4419 | 22     | 3 | 4.53 | 2.68 | KLEDIVPSSHNC DVPHVNR : +57.05000 (C12) | LYT | rep3 |
| 696.9406 | 2087.7982 | 2088.269  | 225.46 | 3 | 2.97 | 1.07 | LEDIVPSSHNC DVPHVNR : +57.05000 (C11)  | LYT | rep1 |
| 696.8711 | 2087.5898 | 2088.269  | 325.25 | 3 | 2.92 | 1.06 | LEDIVPSSHNC DVPHVNR : +57.05000 (C11)  | LYK | rep2 |

**Matching Genes:**

[NP\\_001077597.1](#) (eukaryotic translation initiation factor 5A, putative / eIF-5A, putative [Arabidopsis thaliana])

**Protein Group 131**

**Expression Quality:**

| Group                 | Group Probability | Num Peptides | % Seq Coverage | Num Spectra |
|-----------------------|-------------------|--------------|----------------|-------------|
| Total (Non-Redundant) | 1                 | 4            | 23.87          | 15.0        |

**Peptides:**

| Observed | Mr(expt)  | Mr(calc)  | Mass Error (ppm) | Charge | Score | Score Delta | Peptide                                          | Group | Replicate |
|----------|-----------|-----------|------------------|--------|-------|-------------|--------------------------------------------------|-------|-----------|
| 526.3402 | 1575.9972 | 1574.8318 | 740.01           | 3      | 2.11  | 0.23        | LLACISSRPGQCGR : +57.05000 (C4); +57.05000 (C12) | LYT   | rep1      |
| 788.3274 | 1574.6392 | 1574.8318 | 122.28           | 2      | 1.84  | 0.34        | LLACISSRPGQCGR : +57.05000 (C4); +57.05000 (C12) | LYK   | rep2      |
| 804.6426 | 1607.2696 | 1607.7733 | 313.31           | 2      | 2.51  | 1.18        | QWYLSHYGVELGR                                    | LYT   | rep3      |
| 537.4897 | 1609.4458 | 1607.7733 | 1040.23          | 3      | 2.47  | 0.74        | QWYLSHYGVELGR                                    | LYK   | rep2      |
| 946.0133 | 2835.0164 | 2835.188  | 60.5             | 3      | 2.73  | 1.37        | SAIVQVDAAPFKQWYLSHYGVELGR                        | LYT   | rep1      |
| 945.7278 | 2834.1599 | 2835.188  | 362.62           | 3      | 2.05  | 0.46        | SAIVQVDAAPFKQWYLSHYGVELGR                        | LYK   | rep1      |
| 78 1.657 | 1561.2984 | 1561.615  | 202.74           | 2      | 3.79  | 2.24        | SLDSHIEDQFASGR                                   | LYT   | rep1      |
| 781.4084 | 1560.8011 | 1561.615  | 521.2            | 2      | 1.92  | 0.69        | SLDSHIEDQFASGR                                   | LYK   | rep2      |

**Matching Genes:**

[NP\\_197529.1](#) (40S ribosomal protein S8 (RPS8A) [Arabidopsis thaliana])

**Protein Group 132**

**Expression Quality:**

| Group                 | Group Probability | Num Peptides | % Seq Coverage | Num Spectra |
|-----------------------|-------------------|--------------|----------------|-------------|
| Total (Non-Redundant) | 1                 | 4            | 15.23          | 10.0        |

**Peptides:**

| Observed  | Mr(expt)  | Mr(calc)  | Mass Error (ppm) | Charge | Score | Score Delta | Peptide                       | Group | Replicate |
|-----------|-----------|-----------|------------------|--------|-------|-------------|-------------------------------|-------|-----------|
| 723.0352  | 1444.0547 | 1444.4713 | 288.4            | 2      | 2.34  | 0.7         | AGHQTSAESWGTGR                | LYT   | rep1      |
| 1239.9358 | 2477.856  | 2478.7842 | 374.45           | 2      | 3.64  | 1.89        | GHKIENVPEMPLVVSDSAEAVEK       | LYK   | rep1      |
| 826.9038  | 2477.6879 | 2478.7842 | 442.24           | 3      | 1.85  | 0.62        | GHKIENVPEMPLVVSDSAEAVEK       | LYT   | rep1      |
| 652.0564  | 1302.0972 | 1302.5242 | 327.79           | 2      | 3.16  | 1.65        | KGPLVVFVGTEGAK                | LYT   | rep1      |
| 652.2022  | 1302.3887 | 1302.5242 | 103.99           | 2      | 1.82  | 0.64        | KGPLVVFVGTEGAK                | LYK   | rep2      |
| 712.6692  | 1423.3228 | 1422.6138 | 498.37           | 2      | 2     | 1.06        | NLPGVELCHVER : +57.05000 (C8) | LYK   | rep1      |
| 711.9207  | 1421.8257 | 1422.6138 | 553.97           | 2      | 1.76  | 0.6         | NLPGVELCHVER : +57.05000 (C8) | LYT   | rep3      |

**Matching Genes:**

[NP\\_195907.1](#) (60S ribosomal protein L4/L1 (RPL4D) [Arabidop sis thaliana])

**Protein Group 133**

**Expression Quality:**

| Group                 | Group Probability | Num Peptides | % Seq Coverage | Num Spectra |
|-----------------------|-------------------|--------------|----------------|-------------|
| Total (Non-Redundant) | 1                 | 3            | 19.62          | 24.0        |

**Peptides:**

| Observed | Mr(expt)  | Mr(calc)  | Mass Error (ppm) | Charge | Score | Score Delta | Peptide                                | Group | Replicate |
|----------|-----------|-----------|------------------|--------|-------|-------------|----------------------------------------|-------|-----------|
| 719.9763 | 1437.937  | 1437.6668 | 187.95           | 2      | 2.71  | 1.26        | CHFVAIDIFTSK : +57.05000 (C1)          | LYT   | rep3      |
| 719.5635 | 1437.1114 | 1437.6668 | 386.37           | 2      | 2.71  | 1.16        | CHFVAIDIFTSK : +57.05000 (C1)          | LYK   | rep1      |
| 739.6539 | 2215.9383 | 2216.4419 | 227.21           | 3      | 5.38  | 3.19        | KLEDIVPSSHNC DVPHVNR : +57.05000 (C12) | LYK   | rep3      |
| 739.8055 | 2216.3931 | 2216.4419 | 22               | 3      | 4.53  | 2.68        | KLEDIVPSSHNC DVPHVNR : +57.05000 (C12) | LYT   | rep3      |
| 696.9406 | 2087.7982 | 2088.269  | 225.46           | 3      | 2.97  | 1.07        | LEDIVPSSHNC DVPHVNR : +57.05000 (C11)  | LYT   | rep1      |

|          |           |          |        |   |      |      |                                     |     |      |
|----------|-----------|----------|--------|---|------|------|-------------------------------------|-----|------|
| 696.8711 | 2087.5898 | 2088.269 | 325.25 | 3 | 2.92 | 1.06 | LEDIVPSSHNCVPHVNR : +57.05000 (C11) | LYK | rep2 |
|----------|-----------|----------|--------|---|------|------|-------------------------------------|-----|------|

**Matching Genes:**

[NP\\_172848.1](#) (EIF-5A (eukaryotic translation initiation factor 5A-1); translation initiation factor [Arabidopsis thaliana])

**Protein Group 134**

**Expression Quality:**

| Group                 | Group Probability | Num Peptides | % Seq Coverage | Num Spectra |
|-----------------------|-------------------|--------------|----------------|-------------|
| Total (Non-Redundant) | 1                 | 3            | 7.78           | 10.0        |

**Peptides:**

| Observed | Mr(expt)  | Mr(calc)  | Mass Error (ppm) | Charge | Score | Score Delta | Peptide              | Group | Replicate |
|----------|-----------|-----------|------------------|--------|-------|-------------|----------------------|-------|-----------|
| 786.5817 | 2356.7215 | 2354.862  | 789.63           | 3      | 5.35  | 2.65        | LLEMGYKNPILLHPLGGFTK | LYK   | rep3      |
| 785.9683 | 2354.8813 | 2354.862  | 8.18             | 3      | 3.11  | 1.41        | LLEMGYKNPILLHPLGGFTK | LYT   | rep1      |
| 760.7489 | 1519.4822 | 1519.8354 | 232.41           | 2      | 2.56  | 1.2         | NPILLHPLGGFTK        | LYK   | rep2      |
| 760.9801 | 1519.9446 | 1519.8354 | 71.84            | 2      | 1.41  | 0.48        | NPILLHPLGGFTK        | LYT   | rep3      |
| 559.5433 | 1675.6065 | 1675.8743 | 159.75           | 3      | 3.04  | 1.42        | NPVHNGHALLMTDTR      | LYT   | rep1      |
| 559.33   | 1674.9664 | 1675.8743 | 541.73           | 3      | 1.9   | 0.64        | NPVHNGHALLMTDTR      | LYK   | rep2      |

**Matching Genes:**

[NP\\_188929.1](#) (APS1 (ATP sulfurylase 3) [Arabidopsis thaliana])

**Protein Group 135**

**Expression Quality:**

| Group                 | Group Probability | Num Peptides | % Seq Coverage | Num Spectra |
|-----------------------|-------------------|--------------|----------------|-------------|
| Total (Non-Redundant) | 1                 | 4            | 15.31          | 8.0         |

**Peptides:**

| Observed  | Mr(expt)  | Mr(calc)  | Mass Error (ppm) | Charge | Score | Score Delta | Peptide                       | Group | Replicate |
|-----------|-----------|-----------|------------------|--------|-------|-------------|-------------------------------|-------|-----------|
| 723.0352  | 1444.0547 | 1444.4713 | 288.4            | 2      | 2.34  | 0.7         | AGHQ TSAESWGTGR               | LYT   | rep1      |
| 1239.9358 | 2477.856  | 2478.7842 | 374.45           | 2      | 3.64  | 1.89        | GHKIENVPEMPLVVSDSAEAVEK       | LYK   | rep1      |
| 826.9038  | 2477.6879 | 2478.7842 | 442.24           | 3      | 1.85  | 0.62        | GHKIENVPEMPLVVSDSAEAVEK       | LYT   | rep1      |
| 668.0772  | 1334.1387 | 1334.5229 | 287.92           | 2      | 2.9   | 1.51        | KGPLVVYGTGEGSK                | LYT   | rep2      |
| 712.6692  | 1423.3228 | 1422.6138 | 498.37           | 2      | 2     | 1.06        | NLPGVELCHVER : +57.05000 (C8) | LYK   | rep1      |
| 711.9207  | 1421.8257 | 1422.6138 | 553.97           | 2      | 1.76  | 0.6         | NLPGVELCHVER : +57.05000 (C8) | LYT   | rep3      |

**Matching Genes:**

[NP\\_001030663.1](#) (structural constituent of ribosome [Arabidopsis thaliana])

**Protein Group 136**

**Expression Quality:**

| Group                 | Group Probability | Num Peptides | % Seq Coverage | Num Spectra |
|-----------------------|-------------------|--------------|----------------|-------------|
| Total (Non-Redundant) | 1                 | 3            | 19.39          | 9.0         |

**Peptides:**

| Observed  | Mr(expt)  | Mr(calc)  | Mass Error (ppm) | Charge | Score | Score Delta | Peptide                                        | Group | Replicate |
|-----------|-----------|-----------|------------------|--------|-------|-------------|------------------------------------------------|-------|-----------|
| 690.4606  | 2068.3582 | 2066.2202 | 1034.76          | 3      | 4.28  | 1.81        | HTPGTFTNQMQTSFSEPR                             | LYK   | rep2      |
| 689.5636  | 2065.6673 | 2066.2202 | 267.58           | 3      | 2.81  | 1.3         | HTPGTFTNQMQTSFSEPR                             | LYT   | rep2      |
| 705.9536  | 1409.8916 | 1409.5947 | 210.64           | 2      | 2.42  | 1.1         | RNDGIYIFNLGK                                   | LYK   | rep1      |
| 1000.0645 | 2997.1699 | 2997.3746 | 68.29            | 3      | 4.14  | 2.17        | TDHQPIKEGALGNIPPIAFCDTDSMPMR : +57.05000 (C20) | LYT   | rep1      |
| 999.9286  | 2996.7623 | 2997.3746 | 204.28           | 3      | 3.65  | 1.46        | TDHQPIKEGALGNIPPIAFCDTDSMPMR : +57.05000 (C20) | LYK   | rep1      |

**Matching Genes:**

[NP\\_001031267.1](#) (P40 (40S ribosomal protein SA); structural constituent of ribosome [Arabidopsis thaliana])

**Protein Group 137**



**Expression Quality:**

| Group                 | Group Probability | Num Peptides | % Seq Coverage | Num Spectra |
|-----------------------|-------------------|--------------|----------------|-------------|
| Total (Non-Redundant) | 1                 | 3            | 27.31          | 11.0        |

**Peptides:**

| Observed  | Mr(expt)  | Mr(calc)  | Mass Error (ppm) | Charge | Score | Score Delta | Peptide                       | Group | Replicate |
|-----------|-----------|-----------|------------------|--------|-------|-------------|-------------------------------|-------|-----------|
| 630.9508  | 1889.8289 | 1889.2084 | 328.49           | 3      | 2.63  | 0.58        | ATPLIVHLVDTSSLPLGR            | LYK   | rep3      |
| 824.5843  | 1647.1529 | 1647.8373 | 415.33           | 2      | 2.51  | 0.88        | AVSVEENPHAIPTRK               | LYT   | rep1      |
| 824.6433  | 1647.271  | 1647.8373 | 343.62           | 2      | 2.16  | 0.73        | AVSVEENPHAIPTRK               | LYK   | rep2      |
| 1094.1229 | 3279.3453 | 3278.8066 | 164.29           | 3      | 5.42  | 3.27        | SMYELLKPDGELITLMYPITDHVGGPPYK | LYK   | rep1      |
| 1093.7479 | 3278.2203 | 3278.8066 | 178.82           | 3      | 4.32  | 2.43        | SMYELLKPDGELITLMYPITDHVGGPPYK | LYT   | rep3      |

**Matching Genes:**

[NP\\_181919.1](#) (thiol methyltransferase, putative [Arabidopsis thaliana])

**Protein Group 138****Expression Quality:**

| Group                 | Group Probability | Num Peptides | % Seq Coverage | Num Spectra |
|-----------------------|-------------------|--------------|----------------|-------------|
| Total (Non-Redundant) | 1                 | 2            | 12.06          | 7.0         |

**Peptides:**

| Observed  | Mr(expt)  | Mr(calc)  | Mass Error (ppm) | Charge | Score | Score Delta | Peptide                                              | Group | Replicate |
|-----------|-----------|-----------|------------------|--------|-------|-------------|------------------------------------------------------|-------|-----------|
| 1312.7782 | 3935.3111 | 3936.3664 | 268.09           | 3      | 5.72  | 3.76        | FGLKEDTIDFIGHAVALHCNDNHLHQPAYDTVMR : +57.05000 (C19) | LYK   | rep1      |
| 1312.7313 | 3935.1705 | 3936.3664 | 303.82           | 3      | 5.29  | 3.4         | FGLKEDTIDFIGHAVALHCNDNHLHQPAYDTVMR : +57.05000 (C19) | LYT   | rep3      |
| 732.1591  | 2193.4537 | 2193.4889 | 16.07            | 3      | 4.78  | 2.62        | KSDMYVFCCSYSHNVAPK : +57.05000 (C8); +57.05000 (C9)  | LYK   | rep2      |
| 732.0355  | 2193.0831 | 2193.4889 | 185.03           | 3      | 3.38  | 1.35        | KSDMYVFCCSYSHNVAPK : +57.05000 (C8); +57.05000 (C9)  | LYT   | rep3      |

&nb sp; **Matching Genes:**

[NP\\_001078054.1](#) (ATGDI1 (Arabidopsis thaliana guanosine diphosphate dissociation inhibitor 1))

---

**Protein Group 139**

**Expression Quality:**

| Group                 | Group Probability | Num Peptides | % Seq Coverage | Num Spectra |
|-----------------------|-------------------|--------------|----------------|-------------|
| Total (Non-Redundant) | 1                 | 3            | 9.78           | 16.0        |

**Peptides:**

| Observed | Mr(expt)  | Mr(calc)  | Mass Error (ppm) | Charge | Score | Score Delta | Peptide                                                                | Group | Replicate |
|----------|-----------|-----------|------------------|--------|-------|-------------|------------------------------------------------------------------------|-------|-----------|
| 1609.525 | 4825.5516 | 4825.2642 | 59.56            | 3      | 3.95  | 2.3         | HGIVVSCSAGNSGPNPETATNIAPWILTVGASTVDREFAANAITGD<br>GK : +57.0 5000 (C7) | LYK   | rep1      |
| 441.1014 | 1320.2807 | 1320.5012 | 167.02           | 3      | 3.21  | 1.32        | KAHPDWSPAAIK                                                           | LYT   | rep3      |
| 440.9629 | 1319.8652 | 1320.5012 | 481.65           | 3      | 1.98  | 0.46        | KAHPDWSPAAIK                                                           | LYK   | rep2      |
| 834.5279 | 1667.0401 | 1666.7561 | 170.38           | 2      | 3.28  | 1.59        | SSNSFIHGAGHVDPNK                                                       | LYT   | rep3      |
| 833.9851 | 1665.9546 | 1666.7561 | 480.85           | 2      | 2.73  | 1.18        | SSNSFIHGAGHVDPNK                                                       | LYK   | rep2      |

**Matching Genes:**

[NP\\_566473.2](#) (subtilase family protein [Arabidopsis thaliana])

---

**Protein Group 140**

**Expression Quality:**

| Group                 | Group Probability | Num Peptides | % Seq Coverage | Num Spectra |
|-----------------------|-------------------|--------------|----------------|-------------|
| Total (Non-Redundant) | 1                 | 3            | 18.77          | 21.0        |

**Peptides:**

| Observed | Mr(expt)  | Mr(calc)  | Mass Error (ppm) | Charge | Score | Score Delta | Peptide                                        | Group | Replicate |
|----------|-----------|-----------|------------------|--------|-------|-------------|------------------------------------------------|-------|-----------|
| 837.8735 | 2510.5971 | 2509.8284 | 306.31           | 3      | 6.52  | 4.77        | HGLSQTDMIALSGAHTIGFAHCGK : +57.05000 (C22)     | LYK   | rep1      |
| 837.3846 | 2509.1305 | 2509.8284 | 278.07           | 3      | 6.19  | 4.01        | HGLSQTDMIALSGAHTIGFAHCGK : +57.05000 (C22)     | LYT   | rep2      |
| 414.6971 | 1241.0678 | 1240.4365 | 508.9            | 3      | 1.49  | 0.32        | LFFHDCFVR : +57.05000 (C6)                     | LYT   | rep2      |
| 414.5786 | 1240.7124 | 1240.4365 | 222.38           | 3      | 1.43  | 0.31        | LFFHDCFVR : +57.05000 (C6)                     | LYK   | rep2      |
| 1084.162 | 3249.4625 | 3248.7837 | 208.94           | 3      | 2.31  | 0.41        | MEKNTSQTIFSNFFLLLLLSSCVSAQLR : +57.05000 (C22) | LYT   | rep2      |

**Matching Genes:**

[NP\\_194746.1](#) (peroxidase, putative [Arabidopsis thaliana])

---

**Protein Group 141**

**Expression Quality:**

| Group                 | Group Probability | Num Peptides | % Seq Coverage | Num Spectra |
|-----------------------|-------------------|--------------|----------------|-------------|
| Total (Non-Redundant) | 1                 | 3            | 22.31          | 12.0        |

**Peptides:**

| Observed | Mr(expt)  | Mr(calc)  | Mass Error (ppm) | Charge | Score | Score Delta | Peptide                  | Group | Replicate |
|----------|-----------|-----------|------------------|--------|-------|-------------|--------------------------|-------|-----------|
| 807.41   | 2419.2066 | 2419.4953 | 119.33           | 3      | 3.82  | 2.01        | HSHHHHSSSTPSSAATPTPTAGAR | LYK   | rep2      |

|           |           |           |        |   |      |      |                                                                           |     |      |
|-----------|-----------|-----------|--------|---|------|------|---------------------------------------------------------------------------|-----|------|
| 807.3099  | 2418.9063 | 2419.4953 | 243.45 | 3 | 3.66 | 2.03 | HSHHHHSSSTPSSAATPTPTAGAR                                                  | LYT | rep1 |
| 422.1154  | 1263.3228 | 1263.4747 | 120.26 | 3 | 1.67 | 0.34 | IHIVKDHDMR                                                                | LYK | rep1 |
| 422.3662  | 1264.0752 | 1263.4747 | 475.23 | 3 | 1.18 | 0.07 | IHIVKDHDMR                                                                | LYT | rep2 |
| 1171.8738 | 2341.732  | 2342.7259 | 424.26 | 2 | 4.82 | 2.99 | LGSVSDYCVHHCVCVVVVR : +57.05000 (C8);<br>+57.05000 (C12); +57.05000 (C14) | LYK | rep3 |
| 782.1909  | 2343.5493 | 2342.7259 | 351.47 | 3 | 2.92 | 1.32 | LGSVSDYCVHHCVCVVVVR : +57.05000 (C8);<br>+57.05000 (C12); +57.05000 (C14) | LYT | rep3 |

**Matching Genes:**

[NP\\_568808.1](#) (universal stress protein (USP) family protein [Arabidopsis thaliana])

**Protein Group 142**

**Expression Quality:**

| Group                 | Group Probability | Num Peptides | % Seq Coverage | Num Spectra |
|-----------------------|-------------------|--------------|----------------|-------------|
| Total (Non-Redundant) | 1                 | 3            | 26.97          | 10.0        |

**Peptides:**

| Observed  | Mr(expt)  | Mr(calc)  | Mass Error (ppm) | Charge | Score | Score Delta | Peptide                          | Group | Replicate |
|-----------|-----------|-----------|------------------|--------|-------|-------------|----------------------------------|-------|-----------|
| 538.9132  | 1075.8108 | 1076.3174 | 470.63           | 2      | 2.19  | 0.39        | ITMIWEKR                         | LYT   | rep2      |
| 538.8972  | 1075.7788 | 1076.3174 | 500.34           | 2      | 1.81  | 0.02        | ITMIWEKR                         | LYK   | rep1      |
| 1145.1268 | 3432.357  | 3433.6306 | 370.92           | 3      | 2.13  | 0.83        | NENHLFPDAVGHHIQGVSVDGEWDTHGSIK   | LYK   | rep2      |
| 1259.2948 | 3774.8609 | 3776.0278 | 309.03           | 3      | 5.97  | 3.45        | WRNENHLFPDAVGHHIQGVSVDGEWDTHGSIK | LYK   | rep3      |
| 1259.2089 | 3774.6031 | 3776.0278 | 377.3            | 3      | 4.43  | 2.82        | WRNENHLFPDAVGHHIQGVSVDGEWDTHGSIK | LYT   | rep2      |

**Matching Genes:**

[NP\\_189277.1](#) (major latex protein-related / MLP-related [Arabidopsis thaliana])

**Protein Group 143****Expression Quality:**

| Group                 | Group Probability | Num Peptides | % Seq Coverage | Num Spectra |
|-----------------------|-------------------|--------------|----------------|-------------|
| Total (Non-Redundant) | 1                 | 4            | 18.73          | 5.0         |

**Peptides:**

| Observed | Mr(expt)  | Mr(calc)  | Mass Error (ppm) | Charge | Score | Score Delta | Peptide                                       | Group | Replicate |
|----------|-----------|-----------|------------------|--------|-------|-------------|-----------------------------------------------|-------|-----------|
| 656.3063 | 1310.597  | 1309.4768 | 855.43           | 2      | 2.69  | 0.86        | DIVALSGAHTLGR                                 | LYT   | rep1      |
| 657.1174 | 1968.3288 | 1969.2323 | 458.79           | 3      | 2.83  | 0.68        | MGLDDKDIVALSGAHTLGR                           | LYK   | rep1      |
| 657.473  | 1969.3956 | 1969.2323 | 82.93            | 3      | 2.56  | 1.14        | MGLDDKDIVALSGAHTLGR                           | LYT   | rep1      |
| 976.8142 | 2927.4192 | 2928.1194 | 239.16           | 3      | 3.23  | 1.55        | VDASGPEDCPEEGRLPDAGPPSPATHLR : +57.05000 (C9) | LYT   | rep1      |
| 677.9064 | 2030.6956 | 2031.1924 | 244.55           | 3      | 1.5   | 0.27        | YAADQDAFFKDYAVAHAK                            | LYT   | rep1      |

**Matching Genes:**

[NP\\_001078356.1](#) (SAPX [Arabidopsis thaliana])

**Protein Group 144****Expression Quality:**

| Group                 | Group Probability | Num Peptides | % Seq Coverage | Num Spectra |
|-----------------------|-------------------|--------------|----------------|-------------|
| Total (Non-Redundant) | 1                 | 3            | 13.83          | 24.0        |

**Peptides:**

| Observed | Mr(expt)  | Mr(calc)  | Mass Error (ppm) | Charge | Score | Score Delta | Peptide                                            | Group | Replicate |
|----------|-----------|-----------|------------------|--------|-------|-------------|----------------------------------------------------|-------|-----------|
| 706.0161 | 1410.0166 | 1410.7324 | 507.38           | 2      | 3.45  | 1.56        | IGIMPGYIHKPGK                                      | LYK   | rep3      |
| 706.1754 | 1410.3352 | 1410.7324 | 281.53           | 2      | 2.35  | 0.98        | IGIMPGYIHKPGK                                      | LYT   | rep1      |
| 652.382  | 1954.1224 | 1954.1958 | 37.56            | 3      | 4.29  | 2.07        | KGGTEHLGLPVFNSVAEAK                                | LYK   | rep3      |
| 652.2623 | 1953.7635 | 1954.1958 | 221.2            | 3      | 3.04  | 1.18        | KGGTEHLGLPVFNSVAEAK                                | LYT   | rep2      |
| 877.2835 | 1752.5513 | 1753.1004 | 313.2            | 2      | 2.44  | 1.16        | LIGNPCPGIHKPGECK : +57.05000 (C6); +57.05000 (C15) | LYK   | rep3      |

**Matching Genes:**

[NP\\_196447.1](#) (succinyl-CoA ligase (GDP-forming) alpha-chain, mitochondrial, putative / succinyl-CoA synthetase, alpha chain, putative / SCS-alpha, putative [Arabidopsis thaliana])

---

**Protein Group 145****Expression Quality:**

| Group                 | Group Probability | Num Peptides | % Seq Coverage | Num Spectra |
|-----------------------|-------------------|--------------|----------------|-------------|
| Total (Non-Redundant) | 1                 | 4            | 16.98          | 6.0         |

**Peptides:**

| Observed  | Mr(expt)  | Mr(calc)  | Mass Error (ppm) | Charge | Score | Score Delta | Peptide                                                | Group | Replicate |
|-----------|-----------|-----------|------------------|--------|-------|-------------|--------------------------------------------------------|-------|-----------|
| 720.2106  | 1438.4056 | 1438.6996 | 204.36           | 2      | 1.52  | 0.3         | FGFEVNTLRPMK                                           | LYT   | rep3      |
| 455.9143  | 909.8129  | 910.0563  | 267.48           | 2      | 1.65  | 0.33        | GRYDIMR                                                | LYT   | rep1      |
| 1033.8436 | 3098.5074 | 3098.4556 | 16.73            | 3      | 3.97  | 1.54        | LPCLPGELPSYNDWENHLTTIFPEVR : +57.05000 (C3)            | LYT   | rep3      |
| 1033.9603 | 3098.8575 | 3098.4556 | 129.72           | 3      | 1.35  | 0.24        | LPCLPGELPSYNDWENHLTTIFPEVR : +57.05000 (C3)            | LYK   | rep1      |
| 1323.9989 | 3968.9732 | 3969.3648 | 98.64            | 3      | 3.03  | 1.45        | QISLEPGGQFELSGAPLETTLHQTCAEVNSHLYQVK : +57.05000 (C25) | LYT   | rep1      |

**Matching Genes:**

[NP\\_001031701.1](#) (RML1 (PHYTOALEXIN DEFICIENT 2, ROOT MERISTEMLESS 1) [Arabidopsis thaliana])

---

**Protein Group 146****Expression Quality:**

| Group                 | Group Probability | Num Peptides | % Seq Coverage | Num Spectra |
|-----------------------|-------------------|--------------|----------------|-------------|
| Total (Non-Redundant) | 1                 | 4            | 12.08          | 13.0        |

**Peptides:**

| Observed | Mr(expt)  | Mr(calc)  | Mass Error (ppm) | Charge | Score | Score Delta | Peptide                       | Group | Replicate |
|----------|-----------|-----------|------------------|--------|-------|-------------|-------------------------------|-------|-----------|
| 441.2336 | 1320.6773 | 1320.4581 | 165.97           | 3      | 2.19  | 0.59        | FIDTASIFGHGR                  | LYK   | rep1      |
| 661.0767 | 1320.1377 | 1320.4581 | 242.63           | 2      | 1.51  | 0.14        | FIDTASIFGHGR                  | LYT   | rep3      |
| 492.6749 | 983.3341  | 983.1286  | 209.02           | 2      | 2.15  | 0.6         | HGSLGFLPR                     | LYK   | rep2      |
| 492.5608 | 983.1059  | 983.1286  | 23.17            | 2      | 1.79  | 0.31        | HGSLGFLPR                     | LYT   | rep3      |
| 456.2028 | 1365.5848 | 1365.6103 | 18.68            | 3      | 3.44  | 1.76        | KVACIGAWHPAR : +57.05000 (C4) | LYK   | rep1      |
| 456.1543 | 1365.4394 | 1365.6103 | 125.14           | 3      | 3.06  | 1.45        | KVACIGAWHPAR : +57.05000 (C4) | LYT   | rep1      |
| 791.0612 | 1580.1067 | 1580.6818 | 363.78           | 2      | 2.36  | 1.12        | VGTEAHTAMTEYDR                | LYT   | rep1      |

**Matching Genes:**

[NP\\_001031146.1](#) (ARP1 (ARABIDOPSIS RIBOSOMAL PROTEIN 1); structural constituent of ribosome [Arabidopsis thaliana])

---

**Protein Group 147****Expression Quality:**

| Group                 | Group Probability | Num Peptides | % Seq Coverage | Num Spectra |
|-----------------------|-------------------|--------------|----------------|-------------|
| Total (Non-Redundant) | 1                 | 5            | 10.47          | 16.0        |

**Peptides:**

| Observed | Mr(expt)  | Mr(calc)  | Mass Error (ppm) | Charge | Score | Score Delta | Peptide      | Group | Replicate |
|----------|-----------|-----------|------------------|--------|-------|-------------|--------------|-------|-----------|
| 455.2307 | 1362.6685 | 1362.4982 | 125.01           | 3      | 1.56  | 0.38        | GNVHAVQFHPEK | LYT   | rep3      |
| 403.4922 | 1207.4533 | 1207.3447 | 89.91            | 3      | 2.98  | 1.01        | HVYFVHSYR    | LYK   | rep3      |
| 403.6151 | 1207.8217 | 1207.3447 | 395.05           | 3      | 2.55  | 0.4         | HVYFVHSYR    | LYT   | rep2      |

|           |           |           |        |   |      |      |                           |     |      |
|-----------|-----------|-----------|--------|---|------|------|---------------------------|-----|------|
| 519.0272  | 1554.0582 | 1553.7425 | 203.15 | 3 | 1.84 | 0.35 | MEATAAPFSSIVSSR           | LYT | rep1 |
| 759.8893  | 1517.763  | 1518.6846 | 606.83 | 2 | 1.63 | 0.35 | RGNVHAVQFHPEK             | LYK | rep1 |
| 918.7535  | 2753.2371 | 2754.0105 | 280.81 | 3 | 2.07 | 0.6  | VIRVTNPGPNGEEYAWYQCTVSGGR | LYK | rep1 |
| 918.54 53 | 2752.6124 | 2754.0105 | 507.66 | 3 | 1.7  | 0.21 | VIRVTNPGPNGEEYAWYQCTVSGGR | LYT | rep3 |

**Matching Genes:**

[NP\\_194420.1](#) (AT-HF (Arabidopsis thaliana HisF protein))

---

**Protein Group 148**

**Expression Quality:**

| Group                 | Group Probability | Num Peptides | % Seq Coverage | Num Spectra |
|-----------------------|-------------------|--------------|----------------|-------------|
| Total (Non-Redundant) | 1                 | 3            | 16.11          | 23.0        |

**Peptides:**

| Observed | Mr(expt)  | Mr(calc)   | Mass Error (ppm) | Charge | Score | Score Delta | Peptide                                  | Group | Replicate |
|----------|-----------|------------|------------------|--------|-------|-------------|------------------------------------------|-------|-----------|
| 785.8658 | 2354.5741 | 2355.6594  | 460.75           | 3      | 3.7   | 1.93        | DLVLLSGAHTIGVSHCSSMNTR : +57.05000 (C16) | LYT   | rep1      |
| 807.0321 | 2418.0728 | 2416.7471  | 548.58           | 3      | 3.6   | 0.97        | IISDHIQNHIHNGPSLAAPLIR                   | LYK   | rep3      |
| 806.5416 | 2416.6014 | 2416.7471  | 60.27            | 3      | 3.59  | 1.77        | IISDHIQNHIHNGPSLAAPLIR                   | LYT   | rep3      |
| 417.3369 | 1248.9873 | 1248.4405  | 437.92           | 3      | 2.77  | 1.15        | MHFHDCFVR : +57.05000 (C6)               | LYT   | rep3      |
| 626.0274 | 1250.0391 | 1248.44 05 | 1280.44          | 2      | 2.36  | 0.83        | MHFHDCFVR : +57.05000 (C6)               | LYK   | rep3      |

**Matching Genes:**

[NP\\_188814.1](#) (peroxidase 30 (PER30) (P30) (PRXR9) [Arabidopsis thaliana])

---



**Protein Group 149****Expression Quality:**

| Group                 | Group Probability | Num Peptides | % Seq Coverage | Num Spectra |
|-----------------------|-------------------|--------------|----------------|-------------|
| Total (Non-Redundant) | 1                 | 4            | 17.39          | 22.0        |

**Peptides:**

| Observed | Mr(expt)  | Mr(calc)  | Mass Error (ppm) | Charge | Score | Score Delta | Peptide                             | Group | Replicate |
|----------|-----------|-----------|------------------|--------|-------|-------------|-------------------------------------|-------|-----------|
| 682.9755 | 1363.9353 | 1364.5524 | 452.18           | 2      | 2.67  | 1.33        | AKVHAPEVAVDTK                       | LYT   | rep1      |
| 565.357  | 1128.6983 | 1129.3771 | 601.02           | 2      | 2.07  | 0.26        | DLIVQCLLR : +57.05000 (C6)          | LYK   | rep3      |
| 621.8944 | 1862.6598 | 1863.0268 | 197.01           | 3      | 3.81  | 2.11        | SNDPHGLHCSGGVVLASR : +57.05000 (C9) | LYT   | rep1      |
| 621.951  | 1862.8297 | 1863.0268 | 105.8            | 3      | 3.17  | 1.36        | SNDPHGLHCSGGVVLASR : +57.05000 (C9) | LYK   | rep2      |
| 583.555  | 1165.0943 | 1165.3011 | 177.52           | 2      | 1.48  | 0.32        | VHAPEVAVDTK                         | LYT   | rep1      |
| 583.4989 | 1164.9822 | 1165.3011 | 273.68           | 2      | 1.31  | 0.27        | VHAPEVAVDTK                         | LYK   | rep2      |

**Matching Genes:**

[NP\\_192853.1](#) (TUF (VACUOLAR ATP SYNTHASE SUBUNIT E1) [Arabidopsis thaliana])

**Protein Group 150****Expression Quality:**

| Group                 | Group Probability | Num Peptides | % Seq Coverage | Num Spectra |
|-----------------------|-------------------|--------------|----------------|-------------|
| Total (Non-Redundant) | 1                 | 2            | 22.65          | 19.0        |

**Peptides:**

| Observed  | Mr(expt)  | Mr(calc)  | Mass Error (ppm) | Charge | Score | Score Delta | Peptide                               | Group | Replicate |
|-----------|-----------|-----------|------------------|--------|-------|-------------|---------------------------------------|-------|-----------|
| 998.3765  | 2992.1059 | 2991.4541 | 217.9            | 3      | 5.12  | 2.09        | IHSENTGNTAILNLLPLLQGNVGLIFTK          | LYK   | rep3      |
| 998.0385  | 2991.0919 | 2991.4541 | 121.08           | 3      | 4.22  | 2.29        | IHSENTGNTAILNLLPLLQGNVGLIFTK          | LYT   | rep2      |
| 1372.4247 | 4114.2506 | 4114.5815 | 80.44            | 3      | 4.9   | 2.78        | LGIRPFSYGLVVQSVYDNGSVFSPEVLDLTEDQLVEK | LYT   | rep3      |
| 1372.837  | 4115.4876 | 4114.5815 | 220.22           | 3      | 4.79  | 2.33        | LGIRPFSYGLVVQSVYDNGSVFSPEVLDLTEDQLVEK | LYK   | rep2      |

**Matching Genes:**

[NP\\_001078125.1](#) (60S acidic ribosomal protein P0 (RPP0B) [Arabidopsis thaliana])

---

**Protein Group 151****Expression Quality:**

| Group                 | Group Probability | Num Peptides | % Seq Coverage | Num Spectra |
|-----------------------|-------------------|--------------|----------------|-------------|
| Total (Non-Redundant) | 1                 | 3            | 7.51           | 9.0         |

**Peptides:**

| Observed | Mr(expt)  | Mr(calc)  | Mass Error (ppm) | Charge | Score | Score Delta | Peptide                                       | Group | Replicate |
|----------|-----------|-----------|------------------|--------|-------|-------------|-----------------------------------------------|-------|-----------|
| 503.9957 | 1508.9637 | 1508.8102 | 101.77           | 3      | 3.45  | 1.99        | CYFSLACLLHPK : +57.05000 (C1); +57.05000 (C7) | LYK   | rep1      |
| 755.709  | 1509.4024 | 1508.8102 | 392.51           | 2      | 2.91  | 1.67        | CYFSLACLLHPK : +57.05000 (C1); +57.05000 (C7) | LYT   | rep3      |
| 629.5574 | 1257.0992 | 1257.4435 | 273.82           | 2      | 2.59  | 1.06        | GKHTYVPVTQK                                   | LYK   | rep3      |
| 612.4531 | 1834.3359 | 1834.1329 | 110.67           | 3      | 3.93  | 2.22        | QGLIKEPVFSFWLNR                               | LYK   | rep1      |

**Matching Genes:**

[NP\\_172655.1](#) (aspartyl protease family protein [Arabidopsis thaliana])

---

**Protein Group 152****Expression Quality:**

| Group                 | Group Probability | Num Peptides | % Seq Coverage | Num Spectra |
|-----------------------|-------------------|--------------|----------------|-------------|
| Total (Non-Redundant) | 1                 | 3            | 7.54           | 16.0        |

**Peptides:**

| Observed | Mr(expt)  | Mr(calc)  | Mass Error (ppm) | Charge | Score | Score Delta | Peptide           | Group | Replicate |
|----------|-----------|-----------|------------------|--------|-------|-------------|-------------------|-------|-----------|
| 686.0316 | 2055.0714 | 2055.2651 | 94.27            | 3      | 3.98  | 1.57        | HPNRPTFLDHIHNITDK | LYK   | rep2      |
| 686.2155 | 2055.6229 | 2055.2651 | 174.07           | 3      | 3.24  | 1.34        | HPNRPTFLDHIHNITDK | LYT   | rep2      |

|          |           |           |        |   |      |      |                            |     |      |
|----------|-----------|-----------|--------|---|------|------|----------------------------|-----|------|
| 592.9625 | 1775.8641 | 1775.9673 | 58.1   | 3 | 3.28 | 1.54 | KFEHPWPANPDPNVK            | LYT | rep1 |
| 992.2478 | 2973.7199 | 2974.3811 | 222.28 | 3 | 2.69 | 1.01 | MMYYADHHGFPIVTFIDTPGAYADLK | LYK | rep3 |

**Matching Genes:**

[NP\\_565880.1](#) (CAC3 (acetyl co-enzyme A carboxylase carboxyltransferase alpha subunit); acetyl-CoA carboxylase [Arabidopsis thaliana])

**Protein Group 153**

**Expression Quality:**

| Group                 | Group Probability | Num Peptides | % Seq Coverage | Num Spectra |
|-----------------------|-------------------|--------------|----------------|-------------|
| Total (Non-Redundant) | 1                 | 3            | 18.46          | 6.0         |

**Peptides:**

| Observed  | Mr(expt)  | Mr(calc)  | Mass Error (ppm) | Charge | Score | Score Delta | Peptide                            | Group | Replicate |
|-----------|-----------|-----------|------------------|--------|-------|-------------|------------------------------------|-------|-----------|
| 690.9884  | 2069.9417 | 2070.3618 | 202.9            | 3      | 3.66  | 1.64        | FNKVFNNGMSNHSTITMK                 | LYT   | rep1      |
| 1137.91   | 3410.7066 | 3411.8113 | 323.77           | 3      | 4.57  | 2.32        | GINFDLPHVIEDAPSHPGIEHVGGMDFVSVPK   | LYK   | rep3      |
| 1138.1439 | 3411.4083 | 3411.8113 | 118.11           | 3      | 4.22  | 2.37        | GINFDLPHVIEDAPSHPGIEHVGGMDFVSVPK   | LYT   | rep2      |
| 626.202   | 1875.5826 | 1875.1872 | 210.83           | 3      | 1.67  | 0.66        | QVVHVDCIMLAHNPGGK : +57.05000 (C7) | LYT   | rep3      |

**Matching Genes:**

[NP\\_200227.1](#) (ATOMT1 (O-METHYLTRANSFERASE 1) [Arabidopsis thaliana])

**Protein Group 154**

**Expression Quality:**

| Group                 | Group Probability | Num Peptides | % Seq Coverage | Num Spectra |
|-----------------------|-------------------|--------------|----------------|-------------|
| Total (Non-Redundant) | 1                 | 3            | 36.31          | 16.0        |

**Peptides:**

| Observed | Mr(expt) | Mr(calc) | Mass Error (ppm) | Charge | Score | Score Delta | Peptide | Group | Replicate |
|----------|----------|----------|------------------|--------|-------|-------------|---------|-------|-----------|
|----------|----------|----------|------------------|--------|-------|-------------|---------|-------|-----------|

|           |           |           |        |   |      |      |                                    |     |      |
|-----------|-----------|-----------|--------|---|------|------|------------------------------------|-----|------|
| 594.8757  | 1781.6037 | 1781.9686 | 204.77 | 3 | 2.29 | 1.06 | EGSTNPTFLYFAHGLK                   | LYK | rep2 |
| 594.9049  | 1781.6912 | 1781.9686 | 155.65 | 3 | 1.58 | 0.34 | EGSTNPTFLYFAHGLK                   | LYT | rep3 |
| 647.6184  | 1293.2212 | 1293.4277 | 159.65 | 2 | 2.03 | 0.59 | LSEEDQAVFKK                        | LYT | rep3 |
| 1315.8153 | 3944.4224 | 3945.4199 | 252.82 | 3 | 5.52 | 3.66 | MLVYQDLLTGDELLSDSFPYKEIENGILWEVEGK | LYT | rep2 |
| 1316.0243 | 3945.0494 | 3945.4199 | 93.91  | 3 | 4.33 | 2.42 | MLVYQDLLTGDELLSDSFPYKEIENGILWEVEGK | LYK | rep1 |

**Matching Genes:**

[NP\\_188286.1](#) (TCTP (TRANSLATIONALLY CONTROLLED TUMOR PROTEIN) [Arabidopsis thaliana])

---

**Protein Group 155**

**Expression Quality:**

| Group                 | Group Probability | Num Peptides | % Seq Coverage | Num Spectra |
|-----------------------|-------------------|--------------|----------------|-------------|
| Total (Non-Redundant) | 1                 | 3            | 15.52          | 7.0         |

**Peptides:**

| Observed  | Mr(expt)  | Mr(calc)  | Mass Error (ppm) | Charge | Score | Score Delta | Peptide                                                | Group | Replicate |
|-----------|-----------|-----------|------------------|--------|-------|-------------|--------------------------------------------------------|-------|-----------|
| 740.6383  | 1479.261  | 1479.6035 | 231.47           | 2      | 2.69  | 1.27        | DVAGGKVNQAHLDR                                         | LYT   | rep1      |
| 1341.3558 | 4021.044  | 4022.4261 | 343.6            | 3      | 5.05  | 3.13        | IASETPNPAASIGLYVDCGSIYEAPYFHGATHLLER : +57.05000 (C19) | LYK   | rep2      |
| 1341.5316 | 4021.5714 | 4022.4261 | 212.5            | 3      | 4.39  | 2.51        | IASETPNPAASIGLYVDCGSIYEAPYFHGATHLLER : +57.05000 (C19) | LYT   | rep1      |
| 692.5973  | 2074.7684 | 2076.4077 | 789.49           | 3      | 2.03  | 0.42        | SAVLMNLESRMIAAEDIGR                                    | LYK   | rep3      |

**Matching Genes:**

[NP\\_001077701.1](#) (mitochondrial processing peptidase alpha subunit, putative [Arabidopsis thaliana])

---

**Protein Group 156**

**Expression Quality:**

| Group                 | Group Probability | Num Peptides | % Seq Coverage | Num Spectra |
|-----------------------|-------------------|--------------|----------------|-------------|
| Total (Non-Redundant) | 1                 | 2            | 31.17          | 29.0        |

**Peptides:**

| Observed | Mr(expt)  | Mr(calc)  | Mass Error (ppm) | Charge | Score | Score Delta | Peptide                                                                     | Group | Replicate |
|----------|-----------|-----------|------------------|--------|-------|-------------|-----------------------------------------------------------------------------|-------|-----------|
| 878.9191 | 2633.7337 | 2634.8916 | 439.44           | 3      | 4.64  | 2.82        | FKGPCVSTHNCANVCHNEGFGGGK : +57.05000 (C5); +57.05000 (C11); +57.05000 (C15) | LYK   | rep3      |
| 878.8857 | 2633.6337 | 2634.8916 | 477.38           | 3      | 3.64  | 1.92        | FKGPCVSTHNCANVCHNEGFGGGK : +57.05000 (C5); +57.05000 (C11); +57.05000 (C15) | LYT   | rep1      |
| 787.3121 | 2358.9129 | 2359.544  | 267.45           | 3      | 5.09  | 3.1         | GPCVSTHNCANVCHNEGFGGGK : +57.05000 (C3); +57.05000 (C9); +57.05000 (C13)    | LYT   | rep3      |
| 787.1401 | 2358.3969 | 2359.544  | 486.13           | 3      | 4.01  | 1.99        | GPCVSTHNCANVCHNEGFGGGK : +57.05000 (C3); +57.05000 (C9); +57.05000 (C13)    | LYK   | rep2      |

**Matching Genes:**

[NP\\_178321.1](#) (LCR68/PDF2.3 (Low-molecular-weight cysteine-rich 68); protease inhibitor [Arabidopsis thaliana])

**Protein Group 157****Expression Quality:**

| Group                 | Group Probability | Num Peptides | % Seq Coverage | Num Spectra |
|-----------------------|-------------------|--------------|----------------|-------------|
| Total (Non-Redundant) | 1                 | 4            | 22.89          | 6.0         |

**Peptides:**

| Observed | Mr(expt)  | Mr(calc) | Mass Error (ppm) | Charge | Score | Score Delta | Peptide             | Group | Replicate |
|----------|-----------|----------|------------------|--------|-------|-------------|---------------------|-------|-----------|
| 743.9935 | 2228.9571 | 2228.574 | 171.93           | 3      | 2.73  | 1.16        | EYQIIDHLVGPTLKDEVK  | LYT   | rep2      |
| 634.3297 | 1899.9657 | 1900.193 | 119.63           | 3      | 1.72  | 0.5         | FKAFVVVGDNHGHVGLGVK | LYT   | rep1      |
| 892.0562 | 1782.0967 | 1782.998 | 505.51           | 2      | 2.76  | 1.36        | KVLQFAGIDDVFTSSR    | LYT   | rep1      |

|          |           |           |        |   |     |      |             |     |      |
|----------|-----------|-----------|--------|---|-----|------|-------------|-----|------|
| 695.0447 | 1388.0738 | 1388.5708 | 357.94 | 2 | 2.5 | 1.15 | TYGFLTPEFWK | LYT | rep1 |
|----------|-----------|-----------|--------|---|-----|------|-------------|-----|------|

**Matching Genes:**

[NP\\_176134.1](#) (XW6; structural constituent of ribosome [Arabidopsis thaliana])

**Protein Group 158**

**Expression Quality:**

| Group                 | Group Probability | Num Peptides | % Seq Coverage | Num Spectra |
|-----------------------|-------------------|--------------|----------------|-------------|
| Total (Non-Redundant) | 1                 | 4            | 10.65          | 29.0        |

**Peptides:**

| Observed | Mr(expt)  | Mr(calc)  | Mass Error (ppm) | Charge | Score | Score Delta | Peptide         | Group | Replicate |
|----------|-----------|-----------|------------------|--------|-------|-------------|-----------------|-------|-----------|
| 769.7198 | 1537.4239 | 1537.6799 | 166.52           | 2      | 1.57  | 0.43        | EAFPGDVFYLHSR   | LYK   | rep3      |
| 480.4534 | 1438.3366 | 1438.6808 | 239.21           | 3      | 3.03  | 1.17        | GIRPAINVGLSVSR  | LYT   | rep2      |
| 480.6814 | 1439.0207 | 1438.6808 | 236.29           | 3      | 2.7   | 0.88        | GIRPAINVGLSVSR  | LYK   | rep2      |
| 615.125  | 1842.3515 | 1842.0272 | 176.06           | 3      | 2.18  | 0.51        | IRNFYANFQVDEIGR | LYT   | rep1      |
| 615.3879 | 1843.1403 | 1842.0272 | 604.3            | 3      | 1.93  | 0.66        | IRNFYANFQVDEIGR | LYK   | rep1      |
| 678.0459 | 1354.0762 | 1354.5809 | 372.6            | 2      | 2.91  | 0.97        | KSVHEPMQTGLK    | LYK   | rep3      |
| 678.1092 | 1354.2027 | 1354.5809 | 279.24           | 2      | 2.57  | 0.72        | KSVHEPMQTGLK    | LYT   | rep1      |

**Matching Genes:**

[NP\\_085571.2](#) (ATPase subunit 1 [Arabidopsis thaliana])

**Protein Group 159**

**Expression Quality:**

| Group                 | Group Probability | Num Peptides | % Seq Coverage | Num Spectra |
|-----------------------|-------------------|--------------|----------------|-------------|
| Total (Non-Redundant) | 1                 | 3            | 22.69          | 16.0        |

**Peptides:**

| Observed  | Mr(expt)  | Mr(calc)  | Mass Error (ppm) | Charge | Score | Score Delta | Peptide                                       | Group | Replicate |
|-----------|-----------|-----------|------------------|--------|-------|-------------|-----------------------------------------------|-------|-----------|
| 1090.4681 | 3268.3809 | 3269.72   | 409.53           | 3      | 4.69  | 2.14        | ERPFNGLCDFLSSGPVIAMVWEGDGVIR : +57.05000 (C9) | LYK   | rep3      |
| 1090.5765 | 3268.7061 | 3269.72   | 310.07           | 3      | 3.53  | 1.34        | ERPFNGLCDFLSSGPVIAMVWEGDGVIR : +57.05000 (C9) | LYT   | rep1      |
| 669.7987  | 1337.5818 | 1338.4286 | 632.65           | 2      | 2.55  | 1.07        | NIIHGSDGPETAK                                 | LYK   | rep3      |
| 669.9038  | 1337.792  | 1338.4286 | 475.59           | 2      | 1.34  | 0.09        | NIIHGSDGPETAK                                 | LYT   | rep1      |
| 673.1265  | 1344.2373 | 1344.5642 | 243.09           | 2      | 2.45  | 0.98        | TFIAIKPDGVQR                                  | LYT   | rep1      |
| 673.107   | 1344.1983 | 1344.5642 | 272.15           | 2      | 2.19  | 0.7         | TFIAIKPDGVQR                                  | LYK   | rep2      |

&nbsp; **Matching Genes:**

[NP\\_192839.1](#) (NDPK3 (NUCLEOSIDE DIPHOSPHATE KINASE 3); ATP binding / nucleoside diphosphate kinase [Arabidopsis thaliana])

**Protein Group 160****Expression Quality:**

| Group                 | Group Probability | Num Peptides | % Seq Coverage | Num Spectra |
|-----------------------|-------------------|--------------|----------------|-------------|
| Total (Non-Redundant) | 1                 | 3            | 10.24          | 13.0        |

**Peptides:**

| Observed  | Mr(expt)  | Mr(calc)  | Mass Error (ppm) | Charge | Score | Score Delta | Peptide               | Group | Replicate |
|-----------|-----------|-----------|------------------|--------|-------|-------------|-----------------------|-------|-----------|
| 694.8043  | 2081.3895 | 2082.4336 | 501.38           | 3      | 1.12  | 0.36        | AALQAGIDKLADCVGLTLGPR | LYT   | rep1      |
| 694.9755  | 2081.9029 | 2082.4336 | 254.83           | 3      | 1     | 0.23        | AALQAGIDKLADCVGLTLGPR | LYK   | rep2      |
| 1127.0633 | 2252.1109 | 2250.6406 | 653.26           | 2      | 3.89  | 2.45        | APLLIAEDVTGEALATLVVVK | LYK   | rep3      |
| 868.8744  | 1735.7332 | 1735.9892 | 147.5            | 2      | 4.59  | 2.99        | HGLLSVTSGANPVSLKR     | LYK   | rep1      |
| 868.5734  | 1735.1311 | 1735.9892 | 494.3            | 2      | 4.55  | 2.87        | HGLLSVTSGANPVSLKR     | LYT   | rep3      |

**Matching Genes:**

[NP\\_180367.1](#) (CPN60A (chloroplast / 60 kDa chaperonin alpha subunit); ATP binding / protein binding / unfolded protein binding [Arabidopsis thaliana])

---

**Protein Group 161****Expression Quality:**

| Group                 | Group Probability | Num Peptides | % Seq Coverage | Num Spectra |
|-----------------------|-------------------|--------------|----------------|-------------|
| Total (Non-Redundant) | 1                 | 3            | 15.88          | 12.0        |

**Peptides:**

| Observed  | Mr(expt)  | Mr(calc)  | Mass Error (ppm) | Charge | Score | Score Delta | Peptide                                               | Group | Replicate |
|-----------|-----------|-----------|------------------|--------|-------|-------------|-------------------------------------------------------|-------|-----------|
| 674.4392  | 1346.8628 | 1347.608  | 552.97           | 2      | 3.14  | 0.93        | KLFGVTTLDVVR                                          | LYT   | rep1      |
| 951.8999  | 1901.7842 | 1901.2394 | 286.57           | 2      | 3.16  | 1.67        | MSPLVSTLHLYDIANVK                                     | LYT   | rep1      |
| 1254.0865 | 3759.2362 | 3760.3344 | 292.06           | 3      | 3.27  | 1.01        | TLVEAVAENCPNAFIHIISNPVNSTVPIAAEVLKK : +57.05000 (C10) | LYT   | rep1      |
| 1254.5956 | 3760.7633 | 3760.3344 | 114.04           | 3      | 3.21  | 1.24        | TLVEAVAENCPNAFIHIISNPVNSTVPIAAEVLKK : +57.05000 (C10) | LYK   | rep2      |

**Matching Genes:**

[NP\\_190336.1](#) (MDH (malate dehydrogenase); malate dehydrogenase [Arabidopsis thaliana])

---

**Protein Group 162****Expression Quality:**

| Group                 | Group Probability | Num Peptides | % Seq Coverage | Num Spectra |
|-----------------------|-------------------|--------------|----------------|-------------|
| Total (Non-Redundant) | 1                 | 4            | 18.51          | 16.0        |

**Peptides:**

| Observed  | Mr(expt) | Mr(calc) | Mass Error (ppm) | Charge | Score | Score Delta | Peptide                                                                            | Group | Replicate |
|-----------|----------|----------|------------------|--------|-------|-------------|------------------------------------------------------------------------------------|-------|-----------|
| 1187.2308 | 3558.669 | 3559.799 | 317.43           | 3      | 2.9   | 0.84        | HHGVVTEECDPYFDNTGCSHPGCEPAYPTPK : +57.05000 (C9); +57.05000 (C18); +57.05000 (C23) | LYK   | rep2      |



|           |           |           |        |   |      |      |                                                                                       |     |      |
|-----------|-----------|-----------|--------|---|------|------|---------------------------------------------------------------------------------------|-----|------|
| 435.7463  | 1304.2154 | 1304.4602 | 187.69 | 3 | 2.69 | 1.05 | HITGTNIGGHAVK                                                                         | LYT | rep1 |
| 435.9339  | 1304.7782 | 1304.4602 | 243.8  | 3 | 2.66 | 0.73 | HITGTNIGGHAVK                                                                         | LYK | rep3 |
| 708.9362  | 2123.785  | 2124.3029 | 243.79 | 3 | 2.47 | 0.93 | RGTNECGIEHGVVAGLPSDR : +57.05000 (C6)                                                 | LYK | rep3 |
| 1333.5294 | 3997.5648 | 3998.3207 | 189.07 | 3 | 1.5  | 0.44 | YFKHHGVVTEECDPYFDNTGCSHPGCEPAYTPK : +57.05000 (C12); +57.05000 (C21); +57.05000 (C26) | LYT | rep1 |

**Matching Genes:**

[NP\\_563648.1](#) (cathepsin B-like cysteine protease, putative [Arabidopsis thaliana])

---

**Protein Group 163**

**Expression Quality:**

| Group                 | Group Probability | Num Peptides | % Seq Coverage | Num Spectra |
|-----------------------|-------------------|--------------|----------------|-------------|
| Total (Non-Redundant) | 1                 | 4            | 13.49          | 11.0        |

**Peptides:**

| Observed | Mr(expt)  | Mr(calc)  | Mass Error (ppm) | Charge | Score | Score Delta | Peptide          | Group | Replicate |
|----------|-----------|-----------|------------------|--------|-------|-------------|------------------|-------|-----------|
| 961.9763 | 1921.937  | 1922.2353 | 155.18           | 2      | 1.28  | 0.35        | GFKDQIYDIFQLLPPK | LYK   | rep2      |
| 914.607  | 1827.1983 | 1828.0405 | 460.73           | 2      | 2.92  | 1.49        | GIYAYGFEKPSAIQQR | LYT   | rep1      |
| 914.593  | 1827.1704 | 1828.0405 | 475.96           | 2      | 2.52  | 1.16        | GIYAYGFEKPSAIQQR | LYK   | rep2      |
| 701.4593 | 1400.9029 | 1401.5278 | 445.91           | 2      | 2.97  | 1.68        | GLDVIQQAQSGTGK   | LYT   | rep1      |
| 553.196  | 1104.3763 | 1104.3074 | 62.39            | 2      | 2.39  | 1.18        | KGVAINFVTR       | LYT   | rep1      |

**Matching Genes:**

[NP\\_001030693.1](#) (EIF4A1 (eukaryotic translation initiation factor 4A-1); ATP-dependent helicase [Arabidopsis thaliana])

---

**Protein Group 164****Expression Quality:**

| Group                 | Group Probability | Num Peptides | % Seq Coverage | Num Spectra |
|-----------------------|-------------------|--------------|----------------|-------------|
| Total (Non-Redundant) | 1                 | 3            | 13.88          | 11.0        |

**Peptides:**

| Observed  | Mr(expt)  | Mr(calc)  | Mass Error (ppm) | Charge | Score | Score Delta | Peptide                      | Group | Replicate |
|-----------|-----------|-----------|------------------|--------|-------|-------------|------------------------------|-------|-----------|
| 764.8339  | 2291.4781 | 2291.552  | 32.24            | 3      | 3.86  | 1.34        | IMALDLPHGGHLSHGYQTDTK        | LYK   | rep3      |
| 764.5375  | 2290.5889 | 2291.552  | 420.26           | 3      | 2.89  | 1.27        | IMALDLPHGGHLSHGYQTDTK        | LYT   | rep2      |
| 885.4236  | 2653.2473 | 2654.0432 | 299.89           | 3      | 2.3   | 0.45        | INQAVFPGLQGGPHNHTITGLAVALK   | LYK   | rep3      |
| 1000.759  | 2999.2536 | 2999.3516 | 32.65            | 3      | 3.39  | 1.96        | WGVNVQSLSGSPANFQVYTALLKIPHER | LYK   | rep2      |
| 1000.3622 | 2998.0631 | 2999.3516 | 429.59           | 3      | 3.29  | 0.75        | WGVNVQSLSGSPANFQVYTALLKIPHER | LYT   | rep3      |

**Matching Genes:**

[NP\\_568488.2](#) (SHM2 (SERINE HYDROXYMETHYLTRANSFERASE 2); glycine hydroxymethyltransferase [Arabidopsis thaliana])

**Protein Group 165****Expression Quality:**

| Group                 | Group Probability | Num Peptides | % Seq Coverage | Num Spectra |
|-----------------------|-------------------|--------------|----------------|-------------|
| Total (Non-Redundant) | 1                 | 2            | 26.97          | 9.0         |

**Peptides:**

| Observed  | Mr(expt)  | Mr(calc)  | Mass Error (ppm) | Charge | Score | Score Delta | Peptide                             | Group | Replicate |
|-----------|-----------|-----------|------------------|--------|-------|-------------|-------------------------------------|-------|-----------|
| 538.9132  | 1075.8108 | 1076.3174 | 470.63           | 2      | 2.19  | 0.39        | ITMIWEKR                            | LYT   | rep2      |
| 538.8972  | 1075.7788 | 1076.3174 | 500.34           | 2      | 1.81  | 0.02        | ITMIWEKR                            | LYK   | rep1      |
| 1277.0897 | 3828.2457 | 3828.0947 | 39.44            | 3      | 7.29  | 4.55        | YRNENYLF PDTIGHHIQS VTVHDGEWDTQGGIK | LYK   | rep3      |
| 1276.5924 | 3826.7537 | 3828.0947 | 350.3            | 3      | 5.43  | 2.93        | YRNENYLF PDTIGHHIQS VTVHDGEWDTQGGIK | LYT   | rep3      |

**Matching Genes:**

[NP\\_189276.1](#) (major latex protein-related / MLP-related [Arabidopsis thaliana])

---

**Protein Group 166**

**Expression Quality:**

| Group                 | Group Probability | Num Peptides | % Seq Coverage | Num Spectra |
|-----------------------|-------------------|--------------|----------------|-------------|
| Total (Non-Redundant) | 1                 | 3            | 20             | 13.0        |

**Peptides:**

| Observed | Mr(expt)  | Mr(calc)  | Mass Error (ppm) | Charge | Score | Score Delta | Peptide                                                                | Group | Replicate |
|----------|-----------|-----------|------------------|--------|-------|-------------|------------------------------------------------------------------------|-------|-----------|
| 732.6791 | 2195.0138 | 2195.2778 | 120.29           | 3      | 2.99  | 1.07        | HSHHHSSSTPSAATPTPTAGAR                                                 | LYT   | rep2      |
| 732.7008 | 2195.0789 | 2195.2778 | 90.59            | 3      | 2.7   | 0.84        | HSHHHSSSTPSAATPTPTAGAR                                                 | LYK   | rep2      |
| 422.1154 | 1263.3228 | 1263.4747 | 120.26           | 3      | 1.67  | 0.34        | IHIVKDHDMR                                                             | LYK   | rep1      |
| 422.3662 | 1264.0752 | 1263.4747 | 475.23           | 3      | 1.18  | 0.07        | IHIVKDHDMR                                                             | LYT   | rep2      |
| 1171.873 | 2341.732  | 2342.7259 | 424.26           | 2      | 4.82  | 2.99        | LGSVSDYCVHHCVPVVVVR : +57.05000 (C8); +57.05000 (C12); +57.05000 (C14) | LYK   | rep3      |
| 782.1909 | 2343.5493 | 2342.7259 | 351.47           | 3      | 2.92  | 1.32        | LGSVSDYCVHHCVPVVVVR : +57.05000 (C8); +57.05000 (C12); +57.05000 (C14) | LYT   | rep3      |

**Matching Genes:**

[NP\\_567770.1](#) (universal stress protein (USP) family protein [Arabidopsis thaliana])

---

**Protein Group 167**

**Expression Quality:**

| Group                 | Group Probability | Num Peptides | % Seq Coverage | Num Spectra |
|-----------------------|-------------------|--------------|----------------|-------------|
| Total (Non-Redundant) | 1                 | 3            | 7.99           | 8.0         |

**Peptides:**

| Observed | Mr(expt)  | Mr(calc)  | Mass Error (ppm) | Charge | Score | Score Delta | Peptide           | Group | Replicate |
|----------|-----------|-----------|------------------|--------|-------|-------------|-------------------|-------|-----------|
| 617.9381 | 1850.7909 | 1850.264  | 284.73           | 3      | 4.43  | 2.49        | LKTNPPPHMMPPPPPAK | LYK   | rep3      |
| 617.3242 | 1848.9492 | 1850.264  | 710.63           | 3      | 1.58  | 0.06        | LKTNPPPHMMPPPPPAK | LYT   | rep1      |
| 418.5895 | 1252.745  | 1252.4252 | 255.34           | 3      | 2.73  | 0.61        | RLNTIHLEEK        | LYT   | rep1      |
| 627.1021 | 1252.1885 | 1252.4252 | 188.95           | 2      | 1.89  | 0.25        | RLNTIHLEEK        | LYK   | rep1      |
| 805.6038 | 1609.1919 | 1608.9328 | 161.03           | 2      | 2.17  | 0.6         | TNPPPHMMPPPPPAK   | LYK   | rep3      |

**Matching Genes:**

[NP\\_565484.1](#) (unknown protein [Arabidopsis thaliana])

**Protein Group 168****Expression Quality:**

| Group                 | Group Probability | Num Peptides | % Seq Coverage | Num Spectra |
|-----------------------|-------------------|--------------|----------------|-------------|
| Total (Non-Redundant) | 1                 | 3            | 18.42          | 12.0        |

**Peptides:**

| Observed | Mr(expt)  | Mr(calc)  | Mass Error (ppm) | Charge | Score | Score Delta | Peptide                      | Group | Replicate |
|----------|-----------|-----------|------------------|--------|-------|-------------|------------------------------|-------|-----------|
| 668.6739 | 1335.3321 | 1335.4679 | 101.7            | 2      | 1.71  | 0.61        | AVVVHADPDDLK                 | LYK   | rep2      |
| 668.7542 | 1335.4927 | 1335.4679 | 18.59            | 2      | 1.33  | 0.22        | AVVVHADPDDLK                 | LYT   | rep1      |
| 905.375  | 2713.1015 | 2713.9243 | 303.17           | 3      | 3.68  | 2.07        | AVVVHADPDDLKGGHELSSLATGNAGGR | LYT   | rep1      |
| 905.5585 | 2713.6519 | 2713.9243 | 100.36           | 3      | 3.03  | 1.86        | AVVVHADPDDLKGGHELSSLATGNAGGR | LYK   | rep1      |
| 698.9782 | 1395.9407 | 1396.4713 | 379.95           | 2      | 3.93  | 2.34        | GGHELSSLATGNAGGR             | LYT   | rep1      |
| 699.0398 | 1396.064  | 1396.4713 | 291.66           | 2      | 3.46  | 1.71        | GGHELSSLATGNAGGR             | LYK   | rep2      |

**Matching Genes:**

[NP\\_001077494.1](#) (CSD1 (copper/zinc superoxide dismutase 1) [Arabidopsis thaliana])

---

**Protein Group 169****Expression Quality:**

| Group                 | Group Probability | Num Peptides | % Seq Coverage | Num Spectra |
|-----------------------|-------------------|--------------|----------------|-------------|
| Total (Non-Redundant) | 1                 | 3            | 17.66          | 6.0         |

**Peptides:**

| Observed  | Mr(expt)  | Mr(calc)  | Mass Error (ppm) | Charge | Score | Score Delta | Peptide                                                       | Group | Replicate |
|-----------|-----------|-----------|------------------|--------|-------|-------------|---------------------------------------------------------------|-------|-----------|
| 883.6141  | 2647.8189 | 2648.011  | 72.54            | 3      | 4.25  | 2.18        | LGVFESHGFTYSGHPVSCAVAIEALK : +57.05000 (C17)                  | LYT   | rep3      |
| 883.5452  | 2647.612  | 2648.011  | 150.68           | 3      | 3.38  | 1.31        | LGVFESHGFTYSGHPVSCAVAIEALK : +57.05000 (C17)                  | LYK   | rep3      |
| 1478.1603 | 4431.4574 | 4432.9458 | 335.77           | 3      | 3.32  | 1.52        | SYHGSTLISASLSGLPPLHQNFDPAPFVLHTDCPHYWR : +57.05000 (C34)      | LYT   | rep3      |
| 1478.4374 | 4432.2887 | 4432.9458 | 148.24           | 3      | 1.33  | 0.16        | SYHGSTLISASLSGLPPLHQNFDPAPFVLHTDCPHYWR : +57.05000 (C34)      | LYK   | rep1      |
| 963.5469  | 2887.6171 | 2887.3231 | 101.83           | 3      | 1.7   | 0.34        | YDILFIADEVICAFGR LGTMFGCDK : +57.05000 (C12); +32.00000 (M20) | LYT   | rep3      |

**Matching Genes:**

[NP\\_566700.1 \(POP2 \(POLLEN-PISTIL INCOMPATIBILITY 2\); 4-aminobutyrate transaminase \[Arabidopsis thaliana\]\)](#)

---

**Protein Group 170****Expression Quality:**

| Group                 | Group Probability | Num Peptides | % Seq Coverage | Num Spectra |
|-----------------------|-------------------|--------------|----------------|-------------|
| Total (Non-Redundant) | 1                 | 2            | 16.67          | 14.0        |

**Peptides:**

| Observed | Mr(expt)  | Mr(calc)  | Mass Error (ppm) | Charge | Score | Score Delta | Peptide                  | Group | Replicate |
|----------|-----------|-----------|------------------|--------|-------|-------------|--------------------------|-------|-----------|
| 823.5658 | 2467.6739 | 2467.728  | 21.92            | 3      | 4.26  | 2.4         | HGLGVEEIVNHVMHSWEHATGK   | LYK   | rep3      |
| 918.6566 | 2752.9464 | 2753.9473 | 363.44           | 3      | 5.01  | 3.12        | VYHSHDGLAPHSHEPIYSPGYFSR | LYK   | rep3      |
| 918.7648 | 2753.2708 | 2753.9473 | 245.62           | 3      | 3.94  | 2.23        | VYHSHDGLAPHSHEPIYSPGYFSR | LYT   | rep3      |

**Matching Genes:**

[NP\\_001031481.1](#) (UREG (urease accessory protein G); metal ion binding / nucleotide binding [Arabidopsis thaliana])

**Protein Group 171****Expression Quality:**

| Group                 | Group Probability | Num Peptides | % Seq Coverage | Num Spectra |
|-----------------------|-------------------|--------------|----------------|-------------|
| Total (Non-Redundant) | 1                 | 4            | 29.73          | 9.0         |

**Peptides:**

| Observed  | Mr(expt)  | Mr(calc)  | Mass Error (ppm) | Charge | Score | Score Delta | Peptide                    | Group | Replicate |
|-----------|-----------|-----------|------------------|--------|-------|-------------|----------------------------|-------|-----------|
| 372.0898  | 1113.2461 | 1113.2743 | 25.35            | 3      | 2.21  | 0.79        | AGVAHKIDFR                 | LYT   | rep1      |
| 1223.9065 | 2445.7974 | 2446.8105 | 414.06           | 2      | 2.9   | 1.02        | HPWNIMTTSADEGQFLNMLIK      | LYK   | rep3      |
| 1223.8499 | 2445.6841 | 2446.8105 | 460.36           | 2      | 1.73  | 0.33        | HPWNIMTTSADEGQFLNMLIK      | LYT   | rep2      |
| 910.6576  | 2728.9493 | 2728.0991 | 311.64           | 3      | 2.47  | 0.9         | IGGVIGYDNTLWNGSVVAPPDAPMRK | LYT   | rep2      |
| 910.5591  | 2728.6538 | 2728.0991 | 203.31           | 3      | 2.3   | 0.85        | IGGVIGYDNTLWNGSVVAPPDAPMRK | LYK   | rep3      |
| 777.9459  | 2330.8143 | 2330.7095 | 44.98            | 3      | 1.66  | 0.41        | ILAMDVNRENYELGLPIEK        | LYT   | rep2      |

**Matching Genes:**

[NP\\_195131.1](#) (caffeoyl-CoA 3-O-methyltransferase, putative [Arabidopsis thaliana])

**Protein Group 172****Expression Quality:**

| Group                 | Group Probability | Num Peptides | % Seq Coverage | Num Spectra |
|-----------------------|-------------------|--------------|----------------|-------------|
| Total (Non-Redundant) | 1                 | 2            | 14.66          | 6.0         |

**Peptides:**

| Observed | Mr(expt) | Mr(calc) | Mass | Char | Score | Score | Peptide | Group | Replicat |
|----------|----------|----------|------|------|-------|-------|---------|-------|----------|
|----------|----------|----------|------|------|-------|-------|---------|-------|----------|

|           |           |           | Error (ppm) | ge |      | Delta |                                                                       | p   | e    |
|-----------|-----------|-----------|-------------|----|------|-------|-----------------------------------------------------------------------|-----|------|
| 1224.0287 | 3669.0626 | 3668.993  | 18.96       | 3  | 4.44 | 2.35  | GHGFEILAFPCNQFGNQEPGTNEEIVQFACTR : +57.05000 (C11); +57.05000 (C30)   | LYK | rep2 |
| 1223.7596 | 3668.2555 | 3668.993  | 201.03      | 3  | 4.27 | 2.28  | GHGFEILAFPCNQFGNQEPGTNEEIVQFACTR : +57.05000 (C11); +57.05000 (C30)   | LYT | rep1 |
| 1321.1271 | 3960.3577 | 3960.3401 | 4.47        | 3  | 4.75 | 2.94  | YKGGHFEILAFPCNQFGNQEPGTNEEIVQFACTR : +57.05000 (C13); +57.05000 (C32) | LYT | rep1 |

**Matching Genes:**

[NP\\_192897.2](#) (ATGPX6 (GLUTATHIONE PEROXIDASE 6); glutathione peroxidase [Arabidopsis thaliana])

**Protein Group 173**

**Expression Quality:**

| Group                 | Group Probability | Num Peptides | % Seq Coverage | Num Spectra |
|-----------------------|-------------------|--------------|----------------|-------------|
| Total (Non-Redundant) | 1                 | 4            | 45.71          | 5.0         |

**Peptides:**

| Observed | Mr(expt)  | Mr(calc)  | Mass Error (ppm) | Charge | Score | Score Delta | Peptide                                                             | Group | Replicate |
|----------|-----------|-----------|------------------|--------|-------|-------------|---------------------------------------------------------------------|-------|-----------|
| 519.006  | 1553.9945 | 1553.7858 | 134.33           | 3      | 2.43  | 0.3         | KVEDVMPIATGHEK                                                      | LYT   | rep1      |
| 518.9203 | 1553.7374 | 1553.7858 | 31.13            | 3      | 2.18  | 0.48        | KVEDVMPIATGHEK                                                      | LYK   | rep2      |
| 854.777  | 1707.5384 | 1706.8568 | 399.31           | 2      | 1.83  | 0.52        | RLDDIDFPEGPFGTK                                                     | LYT   | rep1      |
| 1284.225 | 3849.6514 | 3850.9947 | 348.8            | 3      | 3.33  | 1.5         | SFECPVCTQYFELEVVGPGGPPDGHGDEDDEHHH : +57.05000 (C4); +57.05000 (C7) | LYK   | rep2      |
| 602.9694 | 1805.8846 | 1808.0539 | 1199.82          | 3      | 1.6   | 0.36        | SIAATTRPVGFYLAANR                                                   | LYK   | rep1      |

**Matching Genes:**

[NP\\_001078161.1](#) (cytochrome c oxidase family protein [Arabidopsis thaliana])

---

**Protein Group 174**

**Expression Quality:**

| Group                 | Group Probability | Num Peptides | % Seq Coverage | Num Spectra |
|-----------------------|-------------------|--------------|----------------|-------------|
| Total (Non-Redundant) | 1                 | 3            | 16.23          | 6.0         |

**Peptides:**

| Observed  | Mr(expt)  | Mr(calc)  | Mass Error (ppm) | Charge | Score | Score Delta | Peptide                                                    | Group | Replicate |
|-----------|-----------|-----------|------------------|--------|-------|-------------|------------------------------------------------------------|-------|-----------|
| 1432.8104 | 4295.4078 | 4296.6596 | 291.33           | 3      | 4.33  | 2.67        | AFQLYDSGIFDGSCGTQLDHGVVAVGYGTENGKDYWIVR : +57.05000 ( C14) | LYK   | rep1      |
| 1432.6788 | 4295.013  | 4296.6596 | 383.21           | 3      | 3.66  | 1.98        | AFQLYDSGIFDGSCGTQLDHGVVAVGYGTENGKDYWIVR : +57.05000 (C14)  | LYT   | rep3      |
| 795.5935  | 1589.1714 | 1589.801  | 396.02           | 2      | 3.09  | 0.32        | AVAHQPISIAIEAGGR                                           | LYK   | rep3      |
| 795.5578  | 1589.0999 | 1589.801  | 441.01           | 2      | 2.2   | 0.33        | AVAHQPISIAIEAGGR                                           | LYT   | rep3      |
| 768.4185  | 2302.2319 | 2302.4968 | 115.06           | 3      | 1.75  | 0.6         | VVTIDSYEDVPTYSEESLKK                                       | LYT   | rep1      |

**Matching Genes:**

[NP\\_564497.1](#) (cysteine proteinase (RD21A) / thiol protease [Arabidopsis thaliana])

---

**Protein Group 175**

**Expression Quality:**

| Group                 | Group Probability | Num Peptides | % Seq Coverage | Num Spectra |
|-----------------------|-------------------|--------------|----------------|-------------|
| Total (Non-Redundant) | 1                 | 3            | 11.89          | 13.0        |

**Peptides:**

| Observed | Mr(expt) | Mr(calc) | Mass Error (ppm) | Charge | Score | Score Delta | Peptide | Group | Replicate |
|----------|----------|----------|------------------|--------|-------|-------------|---------|-------|-----------|
|----------|----------|----------|------------------|--------|-------|-------------|---------|-------|-----------|



|          |           |           |        |   |      |      |                  |     |      |
|----------|-----------|-----------|--------|---|------|------|------------------|-----|------|
| 409.5635 | 1225.667  | 1225.4047 | 214.05 | 3 | 2.64 | 1.24 | GHERPLTFLR       | LYK | rep3 |
| 409.4731 | 1225.3958 | 1225.4047 | 7.24   | 3 | 2.23 | 0.84 | GHERPLTFLR       | LYT | rep3 |
| 552.6825 | 1655.024  | 1654.8299 | 117.27 | 3 | 1.87 | 0.38 | GHFGPINALAFNPDGK | LYT | rep3 |
| 551.0208 | 1650.0388 | 1648.8223 | 737.82 | 3 | 4.62 | 0.39 | LHHFDSYFNIKI     | LYK | rep3 |

**Matching Genes:**

[NP\\_182151.1](#) (TRIP-1 (TGF-BETA RECEPTOR INTERACTING PROTEIN 1); nucleotide binding [Arabidopsis thaliana])

**Protein Group 176**

**Expression Quality:**

| Group                 | Group Probability | Num Peptides | % Seq Coverage | Num Spectra |
|-----------------------|-------------------|--------------|----------------|-------------|
| Total (Non-Redundant) | 1                 | 4            | 11.38          | 12.0        |

**Peptides:**

| Observed | Mr(expt)  | Mr(calc)  | Mass Error (ppm) | Charge | Score | Score Delta | Peptide                                | Group | Replicate |
|----------|-----------|-----------|------------------|--------|-------|-------------|----------------------------------------|-------|-----------|
| 711.0934 | 2130.2567 | 2130.4353 | 83.85            | 3      | 1.85  | 0.3         | TKVCIVGSGPAAHTAAIYASR : +57.05000 (C4) | LYT   | rep1      |
| 634.9664 | 1901.8758 | 1901.1581 | 377.53           | 3      | 2.46  | 0.37        | VCIVGSGPAAHTAAIYASR : +57.05000 (C2)   | LYK   | rep3      |
| 634.5699 | 1900.6864 | 1901.1581 | 248.11           | 3      | 1.97  | 0.37        | VCIVGSGPAAHTAAIYASR : +57.05000 (C2)   | LYT   | rep3      |
| 787.7505 | 1573.4854 | 1573.7967 | 197.84           | 2      | 2.8   | 1.29        | VSGLFFAIGHEPATK                        | LYK   | rep2      |
| 787.7491 | 1573.4825 | 1573.7967 | 199.7            | 2      | 1.77  | 0.62        | VSGLFFAIGHEPATK                        | LYT   | rep1      |
| 479.0685 | 956.1213  | 956.1496  | 29.63            | 2      | 2     | 0.37        | VYIIHRR                                | LYK   | rep3      |

**Matching Genes:**

[NP\\_179334.4](#) (NTRA (NADPH-dependent thioredoxin reductase 2) [Arabidopsis thaliana])

**Protein Group 177****Expression Quality:**

| Group                 | Group Probability | Num Peptides | % Seq Coverage | Num Spectra |
|-----------------------|-------------------|--------------|----------------|-------------|
| Total (Non-Redundant) | 1                 | 2            | 18.08          | 6.0         |

**Peptides:**

| Observed  | Mr(expt)  | Mr(calc)  | Mass Error (ppm) | Charge | Score | Score Delta | Peptide                                           | Group | Replicate |
|-----------|-----------|-----------|------------------|--------|-------|-------------|---------------------------------------------------|-------|-----------|
| 1096.8954 | 3287.6627 | 3287.8395 | 53.79            | 3      | 4.38  | 2.41        | EVEVPVVGGHAGVTILPLLSQVKPPCSFTQK : +57.05000 (C26) | LYK   | rep3      |
| 1096.5902 | 3286.7472 | 3287.8395 | 332.25           | 3      | 1.46  | 0.25        | EVEVPVVGGHAGVTILPLLSQVKPPCSFTQK : +57.05000 (C26) | LYT   | rep2      |
| 1165.4828 | 3493.4249 | 3493.9787 | 158.52           | 3      | 4.71  | 2.85        | MNPLVSVLHLYDVANAPGVTADISHMDTSAVVR                 | LYT   | rep1      |
| 1165.0858 | 3492.234  | 3493.9787 | 499.37           | 3      | 2.52  | 0.98        | MNPLVSVLHLYDVANAPGVTADISHMDTSAVVR                 | LYK   | rep2      |

**Matching Genes:**

[NP\\_179863.1](#) (PMDH1 (PEROXISOMAL NAD-MALATE DEHYDROGENASE 1); malate dehydrogenase [Arabidopsis thaliana])

**Protein Group 178****Expression Quality:**

| Group                 | Group Probability | Num Peptides | % Seq Coverage | Num Spectra |
|-----------------------|-------------------|--------------|----------------|-------------|
| Total (Non-Redundant) | 1                 | 2            | 21.34          | 7.0         |

**Peptides:**

| Observed  | Mr(expt)  | Mr(calc)  | Mass Error (ppm) | Charge | Score | Score Delta | Peptide                                                | Group | Replicate |
|-----------|-----------|-----------|------------------|--------|-------|-------------|--------------------------------------------------------|-------|-----------|
| 1156.9706 | 3467.8883 | 3467.9377 | 14.26            | 3      | 6.03  | 3.7         | HKVETEFPLPLYTNHGIGLTTWSPLASGVLTGK                      | LYK   | rep3      |
| 1156.9496 | 3467.8253 | 3467.9377 | 32.43            | 3      | 5.04  | 3.24        | HKVETEFPLPLYTNHGIGLTTWSPLASGVLTGK                      | LYT   | rep1      |
| 1294.9181 | 3881.7308 | 3881.4301 | 77.48            | 3      | 3.01  | 0.99        | VSGLKPIADELGVTLAQLAIWCASNPVSSVITGATR : +57.05000 (C23) | LYT   | rep3      |

**Matching Genes:**

[NP\\_171963.1](#) (KAB1 (POTASSIUM CHANNEL BETA SUBUNIT); potassium channel [Arabidopsis thaliana])

---

**Protein Group 179**

**Expression Quality:**

| Group                 | Group Probability | Num Peptides | % Seq Coverage | Num Spectra |
|-----------------------|-------------------|--------------|----------------|-------------|
| Total (Non-Redundant) | 1                 | 2            | 15.14          | 11.0        |

**Peptides:**

| Observed  | Mr(expt)  | Mr(calc)  | Mass Error (ppm) | Charge | Score | Score Delta | Peptide                                 | Group | Replicate |
|-----------|-----------|-----------|------------------|--------|-------|-------------|-----------------------------------------|-------|-----------|
| 712.5929  | 1423.1702 | 1423.6279 | 321.51           | 2      | 3.89  | 2.46        | HSVGAHPVHLIR                            | LYK   | rep3      |
| 1312.4677 | 3934.3795 | 3936.1518 | 450.28           | 3      | 5.09  | 2.66        | SEPYFETPAPPPSFGHVSHVGHQSPNESYPP<br>EHHR | LYK   | rep3      |
| 1312.8234 | 3935.4466 | 3936.1518 | 179.17           | 3      | 4.08  | 1.96        | SEPYFETPAPPPSFGHVSHVGHQSPNESYPP<br>EHHR | LYT   | rep3      |

**Matching Genes:**

[NP\\_565899.1](#) (hydroxyproline-rich glycoprotein family protein [Arabidopsis thaliana])

---

**Protein Group 180**

**Expression Quality:**

| Group                 | Group Probability | Num Peptides | % Seq Coverage | Num Spectra |
|-----------------------|-------------------|--------------|----------------|-------------|
| Total (Non-Redundant) | 1                 | 4            | 21.82          | 18.0        |

**Peptides:**

| Observed | Mr(expt) | Mr(calc)  | Mass Error (ppm) | Charge | Score | Score Delta | Peptide                                 | Group | Replicate |
|----------|----------|-----------|------------------|--------|-------|-------------|-----------------------------------------|-------|-----------|
| 814.3348 | 2439.981 | 2440.7459 | 313.37           | 3      | 2.32  | 1.02        | FLSCHGPLANRQPGSAFLPAHY : +57.05000 (C4) | LYT   | rep1      |

|          |           |           |        |   |      |      |                                 |     |      |
|----------|-----------|-----------|--------|---|------|------|---------------------------------|-----|------|
| 975.257  | 1948.4983 | 1949.1964 | 358.14 | 2 | 2.08 | 0.63 | GVDEFPFVHLSWEK : +57.05000 (C8) | LYT | rep1 |
| 637.7879 | 1273.5601 | 1273.5373 | 17.87  | 2 | 2.98 | 1.23 | IRVHPFHVLR                      | LYK | rep3 |
| 637.5288 | 1273.042  | 1273.5373 | 388.93 | 2 | 2.52 | 0.95 | IRVHPFHVLR                      | LYT | rep1 |
| 335.8229 | 1004.4453 | 1004.1927 | 251.6  | 3 | 1.55 | 0.6  | VHPFHVLR                        | LYT | rep3 |
| 503.2246 | 1004.4336 | 1004.1927 | 239.95 | 2 | 1.47 | 0.43 | VHPFHVLR                        | LYK | rep2 |

**Matching Genes:**

[NP\\_563945.2](#) (60S ribosomal protein L10 (RPL10A) / Wilm's tumor suppressor protein-related [Arabidopsis thaliana])

**Protein Group 181**

**Expression Quality:**

| Group                 | Group Probability | Num Peptides | % Seq Coverage | Num Spectra |
|-----------------------|-------------------|--------------|----------------|-------------|
| Total (Non-Redundant) | 1                 | 3            | 23.84          | 5.0         |

**Peptides:**

| Observed | Mr(expt)  | Mr(calc)  | Mass Error (ppm) | Charge | Score | Score Delta | Peptide                                                                      | Group | Replicate |
|----------|-----------|-----------|------------------|--------|-------|-------------|------------------------------------------------------------------------------|-------|-----------|
| 791.2784 | 2370.8119 | 2370.4531 | 151.34           | 3      | 3.83  | 2.24        | AGHDYDGGRDLDDFVSFINEK                                                        | LYK   | rep1      |
| 790.9562 | 2369.8451 | 2370.4531 | 256.52           | 3      | 2.49  | 1.14        | AGHDYDGGRDLDDFVSFINEK                                                        | LYT   | rep2      |
| 962.0225 | 1922.0293 | 1923.2273 | 622.88           | 2      | 2.85  | 1.54        | GALVEFYAPWCGHCKK : +57.05000 (C11); +57.05000 (C14)                          | LYT   | rep1      |
| 1539.282 | 4614.8411 | 4615.2216 | 82.44            | 3      | 2.23  | 0.84        | LAAVPQNVVVLTDPDNFDEIVLDQNKDVLVEFYAPWCGHCK : +57.05000 (C36); +57.05000 (C39) | LYT   | rep3      |

**Matching Genes:**

[NP\\_001031555.1](#) (ATPDIL2-1/MEE30/UNE5 (PDI-LIKE 2-1, maternal effect embryo arrest 30, unfertilized embryo sac 5); thiol-disulfide exchange intermediate [Arabidopsis thaliana])

**Protein Group 182****Expression Quality:**

| Group                 | Group Probability | Num Peptides | % Seq Coverage | Num Spectra |
|-----------------------|-------------------|--------------|----------------|-------------|
| Total (Non-Redundant) | 1                 | 3            | 11.03          | 8.0         |

**Peptides:**

| Observed | Mr(expt)  | Mr(calc)  | Mass Error (ppm) | Charge | Score | Score Delta | Peptide                    | Group | Replicate |
|----------|-----------|-----------|------------------|--------|-------|-------------|----------------------------|-------|-----------|
| 764.8339 | 2291.4781 | 2291.552  | 32.24            | 3      | 3.86  | 1.34        | IMALDLPHGGHLSHGYQTDTK      | LYK   | rep3      |
| 764.5375 | 2290.5889 | 2291.552  | 420.26           | 3      | 2.89  | 1.27        | IMALDLPHGGHLSHGYQTDTK      | LYT   | rep2      |
| 885.4236 | 2653.2473 | 2654.0432 | 299.89           | 3      | 2.3   | 0.45        | INQAVFPGLQGGPHNHTITGLAVALK | LYK   | rep3      |
| 420.311  | 1257.9094 | 1257.4003 | 404.95           | 3      | 2.73  | 0.67        | LRHEVEEFAK                 | LYT   | rep3      |

**Matching Genes:**

[NP\\_195506.1](#) (SHM1 (SERINE HYDROXYMETHYLTRANSFERASE 1); glycine hydroxymethyltransferase [Arabidopsis thaliana])

**Protein Group 183****Expression Quality:**

| Group                 | Group Probability | Num Peptides | % Seq Coverage | Num Spectra |
|-----------------------|-------------------|--------------|----------------|-------------|
| Total (Non-Redundant) | 1                 | 3            | 20.97          | 10.0        |

**Peptides:**

| Observed  | Mr(expt)  | Mr(calc)  | Mass Error (ppm) | Charge | Score | Score Delta | Peptide                                     | Group | Replicate |
|-----------|-----------|-----------|------------------|--------|-------|-------------|---------------------------------------------|-------|-----------|
| 550.9344  | 1099.8531 | 1100.2739 | 382.5            | 2      | 2.42  | 1.03        | AKANSLAQLGK                                 | LYT   | rep1      |
| 551.2044  | 1100.3931 | 1100.2739 | 108.33           | 2      | 2.08  | 0.87        | AKANSLAQLGK                                 | LYK   | rep1      |
| 1548.3395 | 4641.995  | 4643.2016 | 259.88           | 3      | 2.86  | 1.27        | RVPPAVPGIMFLSGGQSEAEATLNLNAMNQSPNPWHVSFSYAR | LYT   | rep3      |
| 1025.7872 | 3074.3382 | 3074.4104 | 23.47            | 3      | 3.62  | 1.29        | YAAISQDNGLVPIVEPEILLDGDHPIER                | LYT   | rep1      |
| 1025.5087 | 3073.5025 | 3074.4104 | 295.3            | 3      | 2.87  | 0.97        | YAAISQDNGLVPIVEPEILLDGDHPIER                | LYK   | rep2      |

**Matching Genes:**

[NP\\_178224.1](#) (fructose-bisphosphate aldolase, putative [Arabidopsis thaliana])

**Protein Group 184****Expression Quality:**

| Group                 | Group Probability | Num Peptides | % Seq Coverage | Num Spectra |
|-----------------------|-------------------|--------------|----------------|-------------|
| Total (Non-Redundant) | 1                 | 2            | 11.97          | 18.0        |

**Peptides:**

| Observed | Mr(expt)  | Mr(calc)  | Mass Error (ppm) | Charge | Score | Score Delta | Peptide           | Group | Replicate |
|----------|-----------|-----------|------------------|--------|-------|-------------|-------------------|-------|-----------|
| 848.8454 | 1695.6751 | 1696.774  | 647.67           | 2      | 3.85  | 2.17        | HEEEEEENKPSLLDK   | LYT   | rep1      |
| 849.1082 | 1696.2007 | 1696.774  | 337.89           | 2      | 3.7   | 2.07        | HEEEEEENKPSLLDK   | LYK   | rep2      |
| 709.3568 | 2125.047  | 2125.3074 | 122.52           | 3      | 5.05  | 2.38        | HEEEEHKPTLLEQLHQK | LYK   | rep3      |
| 709.26   | 2124.7566 | 2125.3074 | 259.17           | 3      | 4.75  | 2.15        | HEEEEHKPTLLEQLHQK | LYT   | rep1      |

**Matching Genes:**

[NP\\_564114.2](#) (ERD10/LTI45 (EARLY RESPONSIVE TO DEHYDRATION 10) [Arabidopsis thaliana])

**Protein Group 185****Expression Quality:**

| Group                 | Group Probability | Num Peptides | % Seq Coverage | Num Spectra |
|-----------------------|-------------------|--------------|----------------|-------------|
| Total (Non-Redundant) | 1                 | 4            | 14.76          | 24.0        |

**Peptides:**

| Observed | Mr(expt)  | Mr(calc) | Mass Error (ppm) | Charge | Score | Score Delta | Peptide                                  | Group | Replicate |
|----------|-----------|----------|------------------|--------|-------|-------------|------------------------------------------|-------|-----------|
| 837.3992 | 2509.174  | 2509.865 | 275.31           | 3      | 1.66  | 0.32        | GFCHLYDGQEALAVGMEAAITKK : +57.05000 (C3) | LYK   | rep1      |
| 837.5813 | 2509.7204 | 2509.865 | 57.62            | 3      | 1.49  | 0.42        | GFCHLYDGQEALAVGMEAAITKK : +57.05000 (C3) | LYT   | rep1      |

|          |           |           |        |   |      |      |                |     |      |
|----------|-----------|-----------|--------|---|------|------|----------------|-----|------|
| 461.696  | 1382.0645 | 1381.6228 | 319.69 | 3 | 1.46 | 0.38 | KLLLTHDIATEK   | LYT | rep1 |
| 503.1177 | 1004.2198 | 1004.1446 | 74.81  | 2 | 2.13 | 0.59 | RGDYVPGLK      | LYK | rep2 |
| 502.9271 | 1003.8385 | 1004.1446 | 304.84 | 2 | 2.06 | 0.37 | RGDYVPGLK      | LYT | rep3 |
| 532.4115 | 1594.211  | 1594.6702 | 287.92 | 3 | 3.62 | 1.16 | YHGHSMSDPGSTYR | LYK | rep3 |
| 797.8582 | 1593.7007 | 1594.6702 | 607.92 | 2 | 2.84 | 1.5  | YHGHSMSDPGSTYR | LYT | rep1 |

**Matching Genes:**

[NP\\_173828.1](#) (IAR4 (IAA-conjugate-resistant 4); pyruvate dehydroge nase (acetyl-transferring) [Arabidopsis thaliana])

**Protein Group 186**

**Expression Quality:**

| Group                 | Group Probability | Num Peptides | % Seq Coverage | Num Spectra |
|-----------------------|-------------------|--------------|----------------|-------------|
| Total (Non-Redundant) | 1                 | 3            | 15.61          | 15.0        |

**Peptides:**

| Observed | Mr(expt)  | Mr(calc)  | Mass Error (ppm) | Charge | Score | Score Delta | Peptide             | Group | Replicate |
|----------|-----------|-----------|------------------|--------|-------|-------------|---------------------|-------|-----------|
| 776.71   | 1551.4043 | 1550.6785 | 468.1            | 2      | 2.7   | 1.08        | GALDGGLDIPHS DKR    | LYT   | rep1      |
| 776.1321 | 1550.2486 | 1550.6785 | 277.22           | 2      | 2.66  | 1.03        | GALDGGLDIPHS DKR    | LYK   | rep2      |
| 740.3439 | 2218.0081 | 2218.4709 | 208.61           | 3      | 2.55  | 1.29        | LLGEDEPEKLQTHFSAYIK | LYK   | rep2      |
| 740.4532 | 2218.3363 | 2218.4709 | 60.7             | 3      | 1.71  | 0.44        | LLGEDEPEKLQTHFSAYIK | LYT   | rep2      |
| 773.5076 | 1544.9995 | 1545.7239 | 468.59           | 2      | 3.53  | 1.46        | NYIYGGHVS NYMK      | LYK   | rep2      |
| 773.5862 | 1545.1568 | 1545.7239 | 366.88           | 2      | 3.3   | 1.14        | NYIYGGHVS NYMK      | LYT   | rep1      |

**Mat ching Genes:**

[NP\\_198790.1](#) (60S ribosomal protein L5 (RPL5B) [Arabidopsis thaliana])

**Protein Group 187**

**Expression Quality:**

| Group                 | Group Probability | Num Peptides | % Seq Coverage | Num Spectra |
|-----------------------|-------------------|--------------|----------------|-------------|
| Total (Non-Redundant) | 1                 | 3            | 13.98          | 7.0         |

**Peptides:**

| Observed  | Mr(expt)  | Mr(calc)  | Mass Error (ppm) | Charge | Score | Score Delta | Peptide               | Group | Replicate |
|-----------|-----------|-----------|------------------|--------|-------|-------------|-----------------------|-------|-----------|
| 737.5877  | 1473.1597 | 1473.6341 | 321.95           | 2      | 3.01  | 1.27        | IHYETTGPEIWK          | LYT   | rep1      |
| 737.7383  | 1473.461  | 1473.6341 | 117.51           | 2      | 2.06  | 0.77        | IHYETTGPEIWK          | LYK   | rep2      |
| 692.3284  | 1382.6411 | 1382.6109 | 21.84            | 2      | 1.98  | 0.36        | LFVAIFPSFGER          | LYT   | rep1      |
| 1068.2805 | 2134.5454 | 2135.4285 | 413.5            | 2      | 3.77  | 2.12        | LYGVEPVESAILSGGKPGPHK | LYK   | rep3      |

**Matching Genes:**

[NP\\_193224.1](#) (OASA1 (O-ACETYLSELINE (THIOL) LYASE (OAS-TL) ISOFORM A1) [Arabidopsis thaliana])

**Protein Group 188****Expression Quality:**

| Group                 | Group Probability | Num Peptides | % Seq Coverage | Num Spectra |
|-----------------------|-------------------|--------------|----------------|-------------|
| Total (Non-Redundant) | 0.96              | 3            | 14.13          | 8.0         |

**Peptides:**

| Observed  | Mr(expt)  | Mr(calc)  | Mass Error (ppm) | Charge | Score | Score Delta | Peptide                                            | Group | Replicate |
|-----------|-----------|-----------|------------------|--------|-------|-------------|----------------------------------------------------|-------|-----------|
| 787.7505  | 1573.4854 | 1573.7967 | 197.84           | 2      | 2.8   | 1.29        | VSGLFFAIGHEPATK                                    | LYK   | rep2      |
| 787.7491  | 1573.4825 | 1573.7967 | 199.7            | 2      | 1.77  | 0.62        | VSGLFFAIGHEPATK                                    | LYT   | rep1      |
| 479.0685  | 956.1213  | 956.1496  | 29.63            | 2      | 2     | 0.37        | VYIIHRR                                            | LYK   | rep3      |
| 1114.1307 | 3339.3687 | 3339.6839 | 94.37            | 3      | 3.91  | 0.42        | YRQAITAAGTGCMAALDAEHYLQEIGSQQ GK : +57.05000 (C12) | LYT   | rep1      |

**Matching Genes:**

[NP\\_195271.2](#) (NTR1 (NADPH-dependent thioredoxin reductase 1) [Arabidopsis thaliana])



---

**Protein Group 189****Expression Quality:**

| Group                 | Group Probability | Num Peptides | % Seq Coverage | Num Spectra |
|-----------------------|-------------------|--------------|----------------|-------------|
| Total (Non-Redundant) | 1                 | 3            | 17.3           | 9.0         |

**Peptides:**

| Observed | Mr(expt)  | Mr(calc)  | Mass Error (ppm) | Charge | Score | Score Delta | Peptide                                     | Group | Replicate |
|----------|-----------|-----------|------------------|--------|-------|-------------|---------------------------------------------|-------|-----------|
| 861.4751 | 2581.4018 | 2581.8906 | 189.32           | 3      | 2.36  | 0.56        | FSLNGVNYTLPINKPPNSLHGGNK                    | LYT   | rep3      |
| 861.2465 | 2580.7159 | 2581.8906 | 454.98           | 3      | 2.04  | 0.02        | FSLNGVNYTLPINKPPNSLHGGNK                    | LYK   | rep3      |
| 938.764  | 2813.2686 | 2814.1474 | 312.28           | 3      | 4.14  | 1.84        | HAGVCLETQGFPNAINQSNFPSVVVK : +57.05000 (C5) | LYT   | rep1      |
| 548.5279 | 1095.0401 | 1095.259  | 199.9            | 2      | 2.18  | 0.45        | IWEVAGHKR                                   | LYT   | rep1      |
| 366.1683 | 1095.4815 | 1095.259  | 203.15           | 3      | 1.62  | 0.01        | IWEVAGHKR                                   | LYK   | rep1      |

**Matching Genes:**

[NP\\_566594.2](#) (aldose 1-epimerase family protein [Arabidopsis thaliana])

---

**Protein Group 190****Expression Quality:**

| Group                 | Group Probability | Num Peptides | % Seq Coverage | Num Spectra |
|-----------------------|-------------------|--------------|----------------|-------------|
| Total (Non-Redundant) | 1                 | 2            | 9.62           | 5.0         |

**Peptides:**

| Observed | Mr(expt)  | Mr(calc)  | Mass Error (ppm) | Charge | Score | Score Delta | Peptide                 | Group | Replicate |
|----------|-----------|-----------|------------------|--------|-------|-------------|-------------------------|-------|-----------|
| 749.5613 | 2245.6604 | 2246.4526 | 352.67           | 3      | 5.08  | 1.96        | ASGVAHEVHIYPGNGHAFLNR   | LYK   | rep2      |
| 749.7396 | 2246.1954 | 2246.4526 | 114.5            | 3      | 4.37  | 2.08        | ASGVAHEVHIYPGNGHAFLNR   | LYT   | rep3      |
| 830.1189 | 2487.3332 | 2487.7839 | 181.17           | 3      | 3.54  | 1.24        | LKASGVAHEVHIYPGNGHAFLNR | LYT   | rep1      |

**Matching Genes:**

[NP\\_180811.1](#) (dienelactone hydrolase family protein [Arabidopsis thaliana])

---

**Protein Group 191****Expression Quality:**

| Group                 | Group Probability | Num Peptides | % Seq Coverage | Num Spectra |
|-----------------------|-------------------|--------------|----------------|-------------|
| Total (Non-Redundant) | 0.96              | 3            | 14.13          | 3.0         |

**Peptides:**

| Observed | Mr(expt)  | Mr(calc)  | Mass Error (ppm) | Charge | Score | Score Delta | Peptide          | Group | Replicate |
|----------|-----------|-----------|------------------|--------|-------|-------------|------------------|-------|-----------|
| 720.8445 | 1439.6734 | 1439.704  | 21.25            | 2      | 3.34  | 0           | IEQIYLHSLPVK     | LYT   | rep1      |
| 892.0562 | 1782.0967 | 1782.998  | 505.51           | 2      | 2.76  | 1.36        | KVLQFAGIDDVFTSSR | LYT   | rep1      |
| 695.0447 | 1388.0738 | 1388.5708 | 357.94           | 2      | 2.5   | 1.15        | TYGFLTPEFWK      | LYT   | rep1      |

**Matching Genes:**

[NP\\_191308.1](#) (40S ribosomal protein S2 (RPS2D) [Arabidopsis thaliana])

---

**Protein Group 192****Expression Quality:**

| Group                 | Group Probability | Num Peptides | % Seq Coverage | Num Spectra |
|-----------------------|-------------------|--------------|----------------|-------------|
| Total (Non-Redundant) | 1                 | 3            | 10.31          | 7.0         |

**Peptides:**

| Observed  | Mr(expt)  | Mr(calc)  | Mass Error (ppm) | Charge | Score | Score Delta | Peptide                   | Group | Replicate |
|-----------|-----------|-----------|------------------|--------|-------|-------------|---------------------------|-------|-----------|
| 1234.3926 | 2466.7696 | 2466.8459 | 30.96            | 2      | 2.79  | 1.47        | HFSLIPPGGGGILAHSLAHVASSLK | LYK   | rep1      |
| 1233.9505 | 2465.8853 | 2466.8459 | 389.42           | 2      | 1.86  | 0.71        | HFSLIPPGGGGILAHSLAHVASSLK | LYT   | rep2      |
| 801.3383  | 2400.9913 | 2401.6843 | 288.56           | 3      | 3.9   | 1.98        | LEAVPKPGDSPPIVNAQSSSVHR   | LYT   | rep1      |

|          |           |           |        |   |      |      |                         |     |      |
|----------|-----------|-----------|--------|---|------|------|-------------------------|-----|------|
| 801.3475 | 2401.0191 | 2401.6843 | 276.97 | 3 | 3.19 | 1.65 | LEAVPKPGDSPPIVNAQSSSVHR | LYK | rep2 |
| 697.9269 | 2090.7572 | 2091.2014 | 212.43 | 3 | 1.89 | 0.36 | LEEAHHLNVPSGVEDSTEK     | LYT | rep1 |

**Matching Genes:**

[NP\\_568066.1](#) (unknown protein [Arabidopsis thaliana])

**Protein Group 193**

**Expression Quality:**

| Group                 | Group Probability | Num Peptides | % Seq Coverage | Num Spectra |
|-----------------------|-------------------|--------------|----------------|-------------|
| Total (Non-Redundant) | 1                 | 3            | 28.77          | 17.0        |

**Peptides:**

| Observed | Mr(expt)  | Mr(calc)  | Mass Error (ppm) | Charge | Score | Score Delta | Peptide                       | Group | Replicate |
|----------|-----------|-----------|------------------|--------|-------|-------------|-------------------------------|-------|-----------|
| 683.1925 | 1364.3694 | 1364.5972 | 166.89           | 2      | 2.65  | 1.41        | GHLPENKPFVVK                  | LYK   | rep3      |
| 455.7637 | 1364.2677 | 1364.5972 | 241.41           | 3      | 2.4   | 0.83        | GHLPENKPFVVK                  | LYT   | rep2      |
| 748.1313 | 1494.2469 | 1494.7615 | 344.31           | 2      | 2.63  | 1           | NKFFCPIVNLDK : +57.05000 (C5) | LYT   | rep1      |
| 678.3732 | 2032.096  | 2032.265  | 83.14            | 3      | 3.25  | 1.14        | SSKDNVPLIDVTQHGFVK            | LYK   | rep1      |
| 678.4303 | 2032.2674 | 2032.265  | 1.19             | 3      | 2.65  | 1.07        | SSKDNVPLIDVTQHGFVK            | LYT   | rep1      |

**Matching Genes:**

[NP\\_173743.1](#) (RPL27A (RIBOSOMAL PROTEIN L27A); structural constituent of ribosome [Arabidopsis thaliana])

**Protein Group 194**

**Expression Quality:**

| Group                 | Group Probability | Num Peptides | % Seq Coverage | Num Spectra |
|-----------------------|-------------------|--------------|----------------|-------------|
| Total (Non-Redundant) | 1                 | 4            | 19.01          | 13.0        |

**Peptides:**

| Observed  | Mr(expt)  | Mr(calc)  | Mass Error (ppm) | Charge | Score | Score Delta | Peptide                                                    | Group | Replicate |
|-----------|-----------|-----------|------------------|--------|-------|-------------|------------------------------------------------------------|-------|-----------|
| 1428.08   | 4281.2164 | 4281.688  | 110.15           | 3      | 1.45  | 0.56        | AFQLYSSGVFDGLCGTELDHGCVAVGYGTENGKDYWIVR : +57.05000 (C14 ) | LYK   | rep1      |
| 1427.7389 | 4280.1932 | 4281.688  | 349.12           | 3      | 1.41  | 0.16        | AFQLYSSGVFDGLCGTELDHGCVAVGYGTENGKDYWIVR : +57.05000 (C14)  | LYT   | rep3      |
| 796.0284  | 1590.0411 | 1589.801  | 150.99           | 2      | 2.49  | 0.93        | ALAHQPISVAIEAGGR                                           | LYT   | rep2      |
| 795.6377  | 1589.2598 | 1589.801  | 340.43           | 2      | 2.44  | 0.75        | ALAHQPISVAIEAGGR                                           | LYK   | rep1      |
| 490.3954  | 1468.1629 | 1467.7579 | 275.91           | 3      | 2.29  | 0.62        | CGIAMEASYPIKK : +57.05000 (C1)                             | LYT   | rep2      |
| 742.7008  | 2225.0789 | 2223.3996 | 755.28           | 3      | 2.26  | 0.64        | VVTIDSYEDVPENSEASLKK                                       | LYT   | rep2      |
| 741.9401  | 2222.7967 | 2223.3996 | 271.18           | 3      | 2.04  | 0.76        | VVTIDSYEDVPENSEASLKK                                       | LYK   | rep1      |

**Matching Genes:**

[NP\\_568620.1](#) (cysteine proteinase, putative / thiol protease, putative [Arabidopsis thaliana])

**Protein Group 195**

**Expression Quality:**

| Group                 | Group Probability | Num Peptides | % Seq Coverage | Num Spectra |
|-----------------------|-------------------|--------------|----------------|-------------|
| Total (Non-Redundant) | 0.99              | 3            | 13.61          | 14.0        |

**Peptides:**

| Observed | Mr(expt)  | Mr(calc)  | Mass Error (ppm) | Charge | Score | Score Delta | Peptide      | Group | Replicate |
|----------|-----------|-----------|------------------|--------|-------|-------------|--------------|-------|-----------|
| 451.9636 | 901.9115  | 902.0508  | 154.35           | 2      | 2.62  | 1.1         | GFGFVTFK     | LYT   | rep1      |
| 452.123  | 902.2304  | 902.0508  | 199.12           | 2      | 2.4   | 1.04        | GFGFVTFK     | LYK   | rep2      |
| 638.3841 | 1274.7525 | 1274.4261 | 256.07           | 2      | 3.23  | 1.19        | GFGFVTFKDEK  | LYK   | rep1      |
| 638.2784 | 1274.5411 | 1274.4261 | 90.17            | 2      | 3.05  | 1.26        | GFGFVTFKDEK  | LYT   | rep3      |
| 673.1538 | 1344.292  | 1343.4436 | 631.54           | 2      | 2.58  | 0.63        | TFSQFGDVIDSK | LYT   | rep2      |

**Matching Genes:**

[NP\\_195637.1](#) (ATGRP8/GR-RBP8 (COLD, CIRCADIAN RHYTHM, AND RNA BINDING 1, GLYCINE-RICH PROTEIN 8); RNA binding [Arabidopsis thaliana])

---

**Protein Group 196**

**Expression Quality:**

| Group                 | Group Probability | Num Peptides | % Seq Coverage | Num Spectra |
|-----------------------|-------------------|--------------|----------------|-------------|
| Total (Non-Redundant) | 1                 | 2            | 4.26           | 4.0         |

**Peptides:**

| Observed | Mr(expt)  | Mr(calc)  | Mass Error (ppm) | Charge | Score | Score Delta | Peptide                                        | Group | Replicate |
|----------|-----------|-----------|------------------|--------|-------|-------------|------------------------------------------------|-------|-----------|
| 840.3729 | 2518.0953 | 2518.7336 | 253.43           | 3      | 3.97  | 2.11        | HGTGHHGVGSYLCVHEGPHQVSFR : +57.05000 (C12)     | LYK   | rep3      |
| 977.3862 | 2929.1352 | 2930.1915 | 360.49           | 3      | 4.41  | 2.38        | HGTGHHGVGSYLCVHEGPHQVSFRPSAR : +57.05000 (C12) | LYK   | rep3      |

**Matching Genes:**

NP\_195394.1 (ATAPP1 (aminopeptidase P1) [Arabidopsis thaliana])

---

**Protein Group 197**

**Expression Quality:**

| Group                 | Group Probability | Num Peptides | % Seq Coverage | Num Spectra |
|-----------------------|-------------------|--------------|----------------|-------------|
| Total (Non-Redundant) | 1                 | 2            | 9.92           | 12.0        |

**Peptides:**

| Observed | Mr(expt)  | Mr(calc)  | Mass Error (ppm) | Charge | Score | Score Delta | Peptide               | Group | Replicate |
|----------|-----------|-----------|------------------|--------|-------|-------------|-----------------------|-------|-----------|
| 714.901  | 2141.6795 | 2140.3652 | 614.06           | 3      | 5.35  | 2.3         | NVGLDRPSDLVALSGGHTFGK | LYK   | rep3      |
| 714.2773 | 2139.8086 | 2140.3652 | 260.08           | 3      | 4.48  | 2.2         | NVGLDRPSDLVALSGGHTFGK | LYT   | rep1      |
| 568.3727 | 1702.0946 | 1701.9233 | 100.61           | 3      | 2.79  | 1.3         | TPTVFDNKYYVNLK        | LYK   | rep1      |
| 568.4823 | 1702.4234 | 1701.9233 | 293.84           | 3      | 2.55  | 1.17        | TPTVFDNKYYVNLK        | LYT   | rep2      |

**Matching Genes:**

[NP\\_190481.1](#) (ATPCB/ATPERX34/PERX34/PRXCB (PEROXIDASE 34); peroxidase [Arabidopsis thaliana])

---

### Protein Group 198

#### Expression Quality:

| Group                 | Group Probability | Num Peptides | % Seq Coverage | Num Spectra |
|-----------------------|-------------------|--------------|----------------|-------------|
| Total (Non-Redundant) | 1                 | 3            | 23.22          | 9.0         |

#### Peptides:

| Observed  | Mr(expt)  | Mr(calc)  | Mass Error (ppm) | Charge | Score | Score Delta | Peptide                                                                         | Group | Replicate |
|-----------|-----------|-----------|------------------|--------|-------|-------------|---------------------------------------------------------------------------------|-------|-----------|
| 1611.7679 | 4832.2804 | 4833.5197 | 256.4            | 3      | 3.87  | 1.99        | KVIISAPSADAPMFVVGVEHTYQPNMDIVSNASCTTNCLAPLAK : +57.05000 (C35); +57.05000 (C39) | LYT   | rep1      |
| 1130.9218 | 3389.7418 | 3389.7641 | 6.6              | 3      | 2.34  | 0.35        | LVSWYDNEWGYSNRVLDLIEHMALVAASH                                                   | LYT   | rep1      |
| 871.7848  | 2612.3309 | 2612.9634 | 242.05           | 3      | 1.94  | 0.57        | VVHEEFGILEGLMTTVHATTATQK                                                        | LYT   | rep3      |
| 871.7614  | 2612.2606 | 2612.9634 | 268.96           | 3      | 1.85  | 0.65        | VVHEEFGILEGLMTTVHATTATQK                                                        | LYK   | rep1      |

#### Matching Genes:

[NP\\_178071.1](#) (GAPCP-1; glyceraldehyde-3-phosphate dehydrogenase [Arabidopsis thaliana])

---

### Protein Group 199

#### Expression Quality:

| Group                 | Group Probability | Num Peptides | % Seq Coverage | Num Spectra |
|-----------------------|-------------------|--------------|----------------|-------------|
| Total (Non-Redundant) | 1                 | 2            | 14.25          | 5.0         |

#### Peptides:

| Observed | Mr(expt)  | Mr(calc)  | Mass Error (ppm) | Charge | Score | Score Delta | Peptide          | Group | Replicate |
|----------|-----------|-----------|------------------|--------|-------|-------------|------------------|-------|-----------|
| 544.8058 | 1631.3939 | 1631.8379 | 272.08           | 3      | 2.63  | 0.99        | DTLKVPHTSVGGGHVK | LYT   | rep3      |

|           |           |           |        |   |      |      |                                      |     |      |
|-----------|-----------|-----------|--------|---|------|------|--------------------------------------|-----|------|
| 1286.0673 | 3855.1783 | 3856.2993 | 290.69 | 3 | 5.48 | 3.29 | NALPEWETTGFVEYIAGGPQPGGMYFPVAHGVHAVR | LYK | rep3 |
| 1285.7416 | 3854.2013 | 3856.2993 | 544.06 | 3 | 2.41 | 0.93 | NALPEWETTGFVEYIAGGPQPGGMYFPVAHGVHAVR | LYT | rep3 |

**Matching Genes:**

[NP\\_566328.1](#) (unknown protein [Arabidopsis thaliana])

**Protein Group 200**

**Expression Quality:**

| Group                 | Group Probability | Num Peptides | % Seq Coverage | Num Spectra |
|-----------------------|-------------------|--------------|----------------|-------------|
| Total (Non-Redundant) | 1                 | 2            | 29.27          | 3.0         |

**Peptides:**

| Observed | Mr(expt)  | Mr(calc)  | Mass Error (ppm) | Charge | Score | Score Delta | Peptide                                               | Group | Replicate |
|----------|-----------|-----------|------------------|--------|-------|-------------|-------------------------------------------------------|-------|-----------|
| 668.6739 | 1335.3321 | 1335.4679 | 101.7            | 2      | 1.71  | 0.61        | AVVVHADPDDLK                                          | LYK   | rep2      |
| 668.7542 | 1335.4927 | 1335.4679 | 18.59            | 2      | 1.33  | 0.22        | AVVVHADPDDLK                                          | LYT   | rep1      |
| 1260.535 | 3778.5816 | 3780.1216 | 407.38           | 3      | 6.33  | 4           | ISGLSPGFHGFHIHSFGDTTNGCISTGPHFNPLNR : +57.05000 (C23) | LYK   | rep3      |

**Matching Genes:**

[NP\\_197311.1](#) (CSD3 (COPPER/ZINC SUPEROXIDE DISMUTASE 3); copper, zinc superoxide dismutase [Arabidopsis thaliana])

**Protein Group 201**

**Expression Quality:**

| Group                 | Group Probability | Num Peptides | % Seq Coverage | Num Spectra |
|-----------------------|-------------------|--------------|----------------|-------------|
| Total (Non-Redundant) | 1                 | 2            | 10.91          | 9.0         |

**Peptides:**

| Observed | Mr(expt) | Mr(calc) | Mass Error (ppm) | Charge | Score | Score Delta | Peptide | Group | Replicate |
|----------|----------|----------|------------------|--------|-------|-------------|---------|-------|-----------|
|----------|----------|----------|------------------|--------|-------|-------------|---------|-------|-----------|

|           |           |           |        |   |      |      |                                     |     |      |
|-----------|-----------|-----------|--------|---|------|------|-------------------------------------|-----|------|
| 1039.2216 | 3114.6412 | 3115.5583 | 294.37 | 3 | 5.7  | 3.47 | GGHAALPQHTIDPILAASNIVIVSLQHLVSR     | LYK | rep1 |
| 1039.5458 | 3115.6139 | 3115.5583 | 17.82  | 3 | 4.58 | 2.11 | GGHAALPQHTIDPILAASNIVIVSLQHLVSR     | LYT | rep1 |
| 641.7377  | 1922.1895 | 1922.2243 | 18.07  | 3 | 2.32 | 0.68 | MHACGHDAHTTMLLGAAK : +57.05000 (C4) | LYK | rep1 |

**Matching Genes:**

[NP\\_175587.1](#) (IAR3 (IAA-ALANINE RESISTANT 3); metallopeptidase [Arabidopsis thaliana])

**Protein Group 202**

**Expression Quality:**

| Group                 | Group Probability | Num Peptides | % Seq Coverage | Num Spectra |
|-----------------------|-------------------|--------------|----------------|-------------|
| Total (Non-Redundant) | 1                 | 2            | 14.8           | 12.0        |

**Peptides:**

| Observed  | Mr(expt)  | Mr(calc)  | Mass Error (ppm) | Charge | Score | Score Delta | Peptide                                         | Group | Replicate |
|-----------|-----------|-----------|------------------|--------|-------|-------------|-------------------------------------------------|-------|-----------|
| 1010.8724 | 3029.5938 | 3030.4526 | 283.39           | 3      | 2.28  | 0.83        | IDMGCHIDGFIALVGHTHVLQEGPLSGR : +57.05000 (C5)   | LYT   | rep3      |
| 1011.1215 | 3030.3409 | 3030.4526 | 36.87            | 3      | 1.89  | 0.57        | IDMGCHIDGFIALVGHTHVLQEGPLSGR : +57.05000 (C5)   | LYK   | rep2      |
| 1141.3663 | 3421.0755 | 3421.9341 | 250.91           | 3      | 5.73  | 3.4         | LGLVECVNHGHLQPYPVLYEKPGDFVAQIK : +57.05000 (C6) | LYT   | rep3      |
| 1141.2648 | 3420.7708 | 3421.9341 | 339.95           | 3      | 5.61  | 3           | LGLVECVNHGHLQPYPVLYEKPGDFVAQIK : +57.05000 (C6) | LYK   | rep3      |

**Matching Genes:**

[NP\\_190748.1](#) (ATG2 (G2p-related protein); metalloexopeptidase [Arabidopsis thaliana])

**Protein Group 203**

**Expression Quality:**

| Group                 | Group Probability | Num Peptides | % Seq Coverage | Num Spectra |
|-----------------------|-------------------|--------------|----------------|-------------|
| Total (Non-Redundant) | 1                 | 3            | 14.61          | 20.0        |

**Peptides:**



| Observed | Mr(expt)  | Mr(calc)  | Mass Error (ppm) | Charge | Score | Score Delta | Peptide          | Group | Replicate |
|----------|-----------|-----------|------------------|--------|-------|-------------|------------------|-------|-----------|
| 414.9313 | 827.847   | 827.9734  | 152.76           | 2      | 2.03  | 0.52        | GLVHFQK          | LYK   | rep1      |
| 414.9557 | 827.8958  | 827.9734  | 93.78            | 2      | 2.02  | 0.57        | GLVHFQK          | LYT   | rep1      |
| 872.0307 | 1742.0457 | 1741.9109 | 77.39            | 2      | 3.37  | 1.34        | IDYAPGGLNPPHTHPR | LYK   | rep3      |
| 871.5226 | 1741.0296 | 1741.9109 | 505.94           | 2      | 2.61  | 0.93        | IDYAPGGLNPPHTHPR | LYT   | rep2      |
| 504.9884 | 1007.9612 | 1008.1749 | 211.96           | 2      | 2.56  | 0.93        | KGDVFAPFK        | LYT   | rep1      |
| 504.9739 | 1007.9322 | 1008.1749 | 240.78           | 2      | 2.02  | 0.66        | KGDVFAPFK        | LYK   | rep1      |

**Matching Genes:**

[NP\\_172427.1](#) (GLP5 (GERMIN-LIKE PROTEIN 5); manganese ion binding / metal ion binding / nutrient reservoir [Arabidopsis thaliana])

**Protein Group 204**

**Expression Quality:**

| Group                 | Group Probability | Num Peptides | % Seq Coverage | Num Spectra |
|-----------------------|-------------------|--------------|----------------|-------------|
| Total (Non-Redundant) | 1                 | 2            | 11.4           | 16.0        |

**Peptides:**

| Observed  | Mr(expt)  | Mr(calc)  | Mass Error (ppm) | Charge | Score | Score Delta | Peptide                            | Group | Replicate |
|-----------|-----------|-----------|------------------|--------|-------|-------------|------------------------------------|-------|-----------|
| 543.1937  | 1626.5577 | 1626.6919 | 82.49            | 3      | 3.41  | 1.35        | HKEHISAYGEGNER                     | LYK   | rep3      |
| 1282.088  | 3843.2406 | 3844.3633 | 292.04           | 3      | 4.4   | 2.14        | RPASNMDPYIVTSLLAETLLWEPTLEAEALAAQK | LYK   | rep3      |
| 1283.0302 | 3846.067  | 3844.3633 | 443.17           | 3      | 4.14  | 1.83        | RPASNMDPYIVTSLLAETLLWEPTLEAEALAAQK | LYT   | rep3      |

**Matching Genes:**

[NP\\_001031969.1](#) (GS2 (GLUTAMINE SYNTHETASE 2); glutamate-ammonia ligase [Arabidopsis thaliana])

**Protein Group 205**

**Expression Quality:**

| Group                 | Group Probability | Num Peptides | % Seq Coverage | Num Spectra |
|-----------------------|-------------------|--------------|----------------|-------------|
| Total (Non-Redundant) | 1                 | 3            | 13.88          | 5.0         |

**Peptides:**

| Observed | Mr(expt)  | Mr(calc)  | Mass Error (ppm) | Charge | Score | Score Delta | Peptide                                                    | Group | Replicate |
|----------|-----------|-----------|------------------|--------|-------|-------------|------------------------------------------------------------|-------|-----------|
| 585.0009 | 1751.9791 | 1751.8976 | 46.53            | 3      | 3.57  | 1.45        | IRPSLFDAFGDDSSPK                                           | LYT   | rep1      |
| 678.4232 | 2032.2462 | 2032.2436 | 1.25             | 3      | 2.36  | 0.59        | LNDEDYVKPAMQTHVGSK                                         | LYT   | rep1      |
| 678.2899 | 2031.8463 | 2032.2436 | 195.53           | 3      | 2.33  | 0.88        | LNDEDYVKPAMQTHVGSK                                         | LYK   | rep2      |
| 868.1354 | 2601.3827 | 2600.9548 | 164.49           | 3      | 1.88  | 0.41        | VPPGCRMTIISDSCHSGGLIDEAK : +57.05000 (C5); +57.05000 (C14) | LYK   | rep3      |

**Matching Genes:**

[NP\\_178052.1](#) (latex-abundant protein, putative (AMC7) / caspase family protein [Arabidopsis thaliana])

**Protein Group 206**

**Expression Quality:**

| Group                 | Group Probability | Num Peptides | % Seq Coverage | Num Spectra |
|-----------------------|-------------------|--------------|----------------|-------------|
| Total (Non-Redundant) | 1                 | 2            | 34.32          | 9.0         |

**Peptides:**

| Observed  | Mr(expt)  | Mr(calc)  | Mass Error (ppm) | Charge | Score | Score Delta | Peptide                                                   | Group | Replicate |
|-----------|-----------|-----------|------------------|--------|-------|-------------|-----------------------------------------------------------|-------|-----------|
| 641.9573  | 1922.8483 | 1923.1653 | 164.79           | 3      | 4.51  | 2.29        | GRLHACISPSENGLINGK : +57.05000 (C6)                       | LYK   | rep1      |
| 642.0327  | 1923.0747 | 1923.1653 | 47.11            | 3      | 3.79  | 1.62        | GRLHACISPSENGLINGK : +57.05000 (C6)                       | LYT   | rep2      |
| 1525.8795 | 4574.6151 | 4576.1919 | 344.56           | 3      | 3.28  | 1.3         | SLSHDVFVYGSFQEPSVNLILECSPVMVPAQLHGYHVYR : +57.05000 (C24) | LYT   | rep3      |
| 1526.2177 | 4575.6295 | 4576.1919 | 122.89           | 3      | 2.68  | 1.26        | SLSHDVFVYGSFQEPSVNLILECSPVMVPAQLHGYHVYR : +57.05000 (C24) | LYK   | rep2      |

**Matching Genes:**

[NP\\_566840.1](#) (avirulence-responsive protein, putative / avirulence induced gene (AIG) protein, putative [Arabidopsis thaliana])

---

### Protein Group 207

#### Expression Quality:

| Group                 | Group Probability | Num Peptides | % Seq Coverage | Num Spectra |
|-----------------------|-------------------|--------------|----------------|-------------|
| Total (Non-Redundant) | 0.99              | 4            | 17.96          | 12.0        |

#### Peptides:

| Observed | Mr(expt)  | Mr(calc)  | Mass Error (ppm) | Charge | Score | Score Delta | Peptide          | Group | Replicate |
|----------|-----------|-----------|------------------|--------|-------|-------------|------------------|-------|-----------|
| 437.0707 | 1308.1887 | 1307.4226 | 586              | 3      | 1.88  | 0.12        | HNNVIPSSHFR      | LYK   | rep2      |
| 654.8135 | 1307.6114 | 1307.4226 | 144.38           | 2      | 1.66  | 0.26        | HNNVIPSSHFR      | LYT   | rep3      |
| 368.547  | 1102.6175 | 1102.25   | 333.43           | 3      | 2.09  | 0.52        | KHWQNYVK         | LYT   | rep2      |
| 368.5277 | 1102.5597 | 1102.25   | 280.94           | 3      | 1.92  | 0.41        | KHWQNYVK         | LYK   | rep1      |
| 784.0343 | 1566.053  | 1566.7926 | 472.03           | 2      | 2.04  | 0.48        | MKHNNVIPSSHFR    | LYT   | rep1      |
| 844.1621 | 1686.3086 | 1686.9598 | 386.02           | 2      | 1.77  | 0.69        | PTSGPLRPVVHGQTLK | LYT   | rep3      |

#### Matching Genes :

[NP\\_197778.1](#) (60S ribosomal protein L13 (RPL13D) [Arabidopsis thaliana])

---

### Protein Group 208

#### Expression Quality:

| Group                 | Group Probability | Num Peptides | % Seq Coverage | Num Spectra |
|-----------------------|-------------------|--------------|----------------|-------------|
| Total (Non-Redundant) | 1                 | 2            | 3.83           | 11.0        |

#### Peptides:

| Observed | Mr(expt)  | Mr(calc)  | Mass Error (ppm) | Charge | Score | Score Delta | Peptide        | Group | Replicate |
|----------|-----------|-----------|------------------|--------|-------|-------------|----------------|-------|-----------|
| 569.9742 | 1706.8993 | 1706.8683 | 18.15            | 3      | 4.47  | 2.37        | AHAHNLQVHPYTYR | LYK   | rep3      |

|          |           |           |        |   |      |      |                 |     |      |
|----------|-----------|-----------|--------|---|------|------|-----------------|-----|------|
| 854.5102 | 1707.0047 | 1706.8683 | 79.91  | 2 | 3.02 | 1.48 | AHAHNLQVHPYTYR  | LYT | rep2 |
| 621.8411 | 1862.4997 | 1863.0546 | 297.81 | 3 | 3.26 | 1.46 | RAHAHNLQVHPYTYR | LYK | rep3 |
| 622.176  | 1863.5046 | 1863.0546 | 241.56 | 3 | 1.6  | 0.25 | RAHAHNLQVHPYTYR | LYT | rep2 |

**Matching Genes:**

[NP\\_177561.1](#) (glycerophosphoryl diester phosphodiesterase family protein [Arabidopsis thaliana])

**Protein Group 209**

**Expression Quality:**

| Group                 | Group Probability | Num Peptides | % Seq Coverage | Num Spectra |
|-----------------------|-------------------|--------------|----------------|-------------|
| Total (Non-Redundant) | 1                 | 3            | 7.28           | 12.0        |

**Peptides:**

| Observed  | Mr(expt)  | Mr(calc)  | Mass Error (ppm) | Charge | Score | Score Delta | Peptide                      | Group | Replicate |
|-----------|-----------|-----------|------------------|--------|-------|-------------|------------------------------|-------|-----------|
| 968.5377  | 1935.0598 | 1935.093  | 17.13            | 2      | 2.87  | 0.98        | DSEIAMGGYQPHLSHR             | LYK   | rep2      |
| 646.0631  | 1935.1659 | 1935.093  | 37.65            | 3      | 2.44  | 0.64        | DSEIAMGGYQPHLSHR             | LYT   | rep2      |
| 772.6026  | 1543.1895 | 1543.651  | 298.97           | 2      | 3.38  | 1.17        | GGPREPWHDHSR                 | LYT   | rep2      |
| 515.3732  | 1543.096  | 1543.651  | 359.51           | 3      | 2.55  | 0.57        | GGPREPWHDHSR                 | LYK   | rep1      |
| 1152.6642 | 3454.9691 | 3456.9341 | 568.42           | 3      | 1.45  | 0.38        | MSLWYEHLGMLDETFLDPSSLECIEKVN | LYT   | rep3      |

**Matching Genes:**

[NP\\_188194.1](#) (PLDALPHA1 (PHOSPHOLIPASE D ALPHA 1); phospholipase D [Arabidopsis thaliana])

**Protein Group 210**

**Expression Quality:**

| Group                 | Group Probability | Num Peptides | % Seq Coverage | Num Spectra |
|-----------------------|-------------------|--------------|----------------|-------------|
| Total (Non-Redundant) | 1                 | 2            | 9.52           | 13.0        |

**Peptides:**

| Observed  | Mr(expt)  | Mr(calc)  | Mass Error (ppm) | Charge | Score | Score Delta | Peptide                                         | Group | Replicate |
|-----------|-----------|-----------|------------------|--------|-------|-------------|-------------------------------------------------|-------|-----------|
| 1067.9376 | 3200.7894 | 3201.5359 | 233.17           | 3      | 3.97  | 1.43        | EAPEGSFILLHGCAHNPTGIDPTPEQWVK : +57.05000 (C13) | LYT   | rep1      |
| 1067.8353 | 3200.4825 | 3201.5359 | 329.02           | 3      | 2.96  | 1.3         | EAPEGSFILLHGCAHNPTGIDPTPEQWVK : +57.05000 (C13) | LYK   | rep2      |
| 556.7748  | 1667.3009 | 1665.9242 | 826.38           | 3      | 3.68  | 1.62        | IARPMYSNPPVHGAR                                 | LYK   | rep3      |
| 833.7619  | 1665.5081 | 1665.9242 | 249.77           | 2      | 3.44  | 1.79        | IARPMYSNPPVHGAR                                 | LYT   | rep2      |

**Matching Genes:**

[NP\\_001031767.1](#) (ASP5 (ASPARTATE AMINOTRANSFERASE 5) [Arabidopsis thaliana])

**Protein Group 211****Expression Quality:**

| Group                 | Group Probability | Num Peptides | % Seq Coverage | Num Spectra |
|-----------------------|-------------------|--------------|----------------|-------------|
| Total (Non-Redundant) | 1                 | 2            | 7.89           | 4.0         |

**Peptides:**

| Observed | Mr(expt)  | Mr(calc)  | Mass Error (ppm) | Charge | Score | Score Delta | Peptide            | Group | Replicate |
|----------|-----------|-----------|------------------|--------|-------|-------------|--------------------|-------|-----------|
| 724.9813 | 2171.9205 | 2172.4868 | 260.67           | 3      | 5     | 1.64        | DGLTFLDLIVIQIENLNK | LYK   | rep3      |
| 703.7284 | 2108.1617 | 2108.3599 | 93.98            | 3      | 2.65  | 0.84        | VQLLEIAQVPDEHVNEFK | LYK   | rep2      |

**Matching Genes:**

[NP\\_186975.1](#) (UGP (UDP-glucose pyrophosphorylase); UTP:glucose-1-phosphate uridylyltransferase [Arabidopsis thaliana])

**Protein Group 212****Expression Quality:**

| Group                 | Group Probability | Num Peptides | % Seq Coverage | Num Spectra |
|-----------------------|-------------------|--------------|----------------|-------------|
| Total (Non-Redundant) | 1                 | 3            | 21.86          | 20.0        |

**Peptides:**

| Observed  | Mr(expt)  | Mr(calc)  | Mass Error (ppm) | Charge | Score | Score Delta | Peptide                       | Group | Replicate |
|-----------|-----------|-----------|------------------|--------|-------|-------------|-------------------------------|-------|-----------|
| 386.4553  | 1156.3423 | 1156.2977 | 38.56            | 3      | 2.74  | 0.89        | KHVSAAWWDK                    | LYT   | rep1      |
| 386.4109  | 1156.2092 | 1156.2977 | 76.56            | 3      | 2.6   | 0.8         | KHVSAAWWDK                    | LYK   | rep1      |
| 1050.8998 | 3149.6759 | 3150.5483 | 276.92           | 3      | 2.59  | 1.12        | NEYLAGDFVSLADLAHLPFTEYLVGPIGK | LYK   | rep3      |
| 508.2614  | 1014.5072 | 1014.2241 | 279.16           | 2      | 2.32  | 0.17        | RAVVTLVVEK                    | LYT   | rep2      |

**Matching Genes:**

[NP\\_180644.1](#) (ATGSTF10 (EARLY DEHYDRATION-INDUCED 13); glutathione transferase [Arabidopsis thaliana])

**Protein Group 213****Expression Quality:**

| Group                 | Group Probability | Num Peptides | % Seq Coverage | Num Spectra |
|-----------------------|-------------------|--------------|----------------|-------------|
| Total (Non-Redundant) | 1                 | 3            | 11.81          | 3.0         |

**Peptides:**

| Observed | Mr(expt)  | Mr(calc)  | Mass Error (ppm) | Charge | Score | Score Delta | Peptide                    | Group | Replicate |
|----------|-----------|-----------|------------------|--------|-------|-------------|----------------------------|-------|-----------|
| 565.357  | 1128.6983 | 1129.3771 | 601.02           | 2      | 2.07  | 0.26        | DLIVQCLLR : +57.05000 (C6) | LYK   | rep3      |
| 635.3752 | 1903.1023 | 1903.0342 | 35.78            | 3      | 2.05  | 0.31        | VSQHGFFNHHHHQYK            | LYT   | rep1      |
| 799.0758 | 2394.2039 | 2394.6633 | 191.83           | 3      | 3.47  | 1.29        | VSQHGFFNHHHHQYKHLK         | LYK   | rep3      |

**Matching Genes:**

[NP\\_176602.1](#) (VHA-E3 (VACUOLAR H<sup>+</sup>-ATPASE SUBUNIT E ISOFORM 3); hydrogen ion transporting ATP synthase, rotational mechanism / hydrogen ion transporting ATPase, rotational mechanism [Arabidopsis thaliana])

**Protein Group 214****Expression Quality:**

| Group | Group Probability | Num Peptides | % Seq Coverage | Num Spectra |
|-------|-------------------|--------------|----------------|-------------|
|-------|-------------------|--------------|----------------|-------------|

|                       |      |   |      |     |
|-----------------------|------|---|------|-----|
| Total (Non-Redundant) | 0.98 | 2 | 9.84 | 4.0 |
|-----------------------|------|---|------|-----|

**Peptides:**

| Observed | Mr(expt)  | Mr(calc)  | Mass Error (ppm) | Charge | Score | Score Delta | Peptide                            | Group | Replicate |
|----------|-----------|-----------|------------------|--------|-------|-------------|------------------------------------|-------|-----------|
| 599.9724 | 1796.8938 | 1797.2192 | 181.06           | 3      | 5.24  | 1.63        | FVIQTLAPLGCLPIVR : +57.05000 (C11) | LYK   | rep2      |
| 600.1675 | 1797.479  | 1797.2192 | 144.56           | 3      | 3.48  | 1.25        | FVIQTLAPLGCLPIVR : +57.05000 (C11) | LYT   | rep2      |
| 1239.177 | 2476.3384 | 2477.7778 | 580.93           | 2      | 2.32  | 0.66        | TAPASAPFQFTVDFYNAILTR              | LYK   | rep3      |

**Matching Genes:**

[NP\\_564647.1](#) (myrosinase-associated protein, putative [Arabidopsis thaliana])

**Protein Group 215**

**Expression Quality:**

| Group                 | Group Probability | Num Peptides | % Seq Coverage | Num Spectra |
|-----------------------|-------------------|--------------|----------------|-------------|
| Total (Non-Redundant) | 1                 | 3            | 15.81          | 5.0         |

**Peptides:**

| Observed | Mr(expt)  | Mr(calc)  | Mass Error (ppm) | Charge | Score | Score Delta | Peptide           | Group | Replicate |
|----------|-----------|-----------|------------------|--------|-------|-------------|-------------------|-------|-----------|
| 617.3229 | 1848.9452 | 1848.0138 | 503.98           | 3      | 3.1   | 1.03        | FNYMHYDNTHGAIHK   | LYT   | rep3      |
| 553.2799 | 1656.8162 | 1656.9307 | 69.05            | 3      | 2.09  | 0.48        | IFLLGPSHHFYTPK    | LYT   | rep2      |
| 553.3424 | 1657.0037 | 1656.9307 | 44.11            | 3      | 1.87  | 0.22        | IFLLGPSHHFYTPK    | LYK   | rep2      |
| 658.002  | 1970.9824 | 1972.1297 | 581.79           | 3      | 2.32  | 0.91        | IRQPTHAGSWYTDNPTK | LYT   | rep3      |

**Matching Genes:**

[NP\\_565590.1](#) (unknown protein [Arabidopsis thaliana])

**Protein Group 216**

**Expression Quality:**

| Group                 | Group Probability | Num Peptides | % Seq Coverage | Num Spectra |
|-----------------------|-------------------|--------------|----------------|-------------|
| Total (Non-Redundant) | 1                 | 3            | 16.19          | 7.0         |

**Peptides:**

| Observed | Mr(expt)  | Mr(calc)  | Mass Error (ppm) | Charge | Score | Score Delta | Peptide                  | Group | Replicate |
|----------|-----------|-----------|------------------|--------|-------|-------------|--------------------------|-------|-----------|
| 542.635  | 1083.2544 | 1083.3099 | 51.23            | 2      | 2.45  | 1.14        | HAMVAAGSLVK              | LYK   | rep2      |
| 542.4247 | 1082.8338 | 1083.3099 | 439.53           | 2      | 2.44  | 1.09        | HAMVAAGSLVK              | LYT   | rep1      |
| 421.1401 | 1260.3969 | 1260.4708 | 58.61            | 3      | 2.61  | 0.23        | HRTL MNVFDK              | LYT   | rep1      |
| 941.0779 | 2820.2102 | 2820.0437 | 59.03            | 3      | 2.43  | 0.32        | NYINLAQIHASENSKSFEQIEVER | LYK   | rep3      |

**Matching Genes:**

[NP\\_175159.1](#) (APFI; carbonate dehydratase [Arabidopsis thaliana])

**Protein Group 217**

**Expression Quality:**

| Group                 | Group Probability | Num Peptides | % Seq Coverage | Num Spectra |
|-----------------------|-------------------|--------------|----------------|-------------|
| Total (Non-Redundant) | 1                 | 3            | 6.17           | 12.0        |

**Peptides:**

| Observed | Mr(expt)  | Mr(calc)  | Mass Error (ppm) | Charge | Score | Score Delta | Peptide                         | Group | Replicate |
|----------|-----------|-----------|------------------|--------|-------|-------------|---------------------------------|-------|-----------|
| 903.7321 | 1805.4485 | 1806.0829 | 351.23           | 2      | 2.64  | 1           | FDPKIGGHLPGVHYIR                | LYT   | rep2      |
| 440.516  | 1318.5245 | 1318.5317 | 5.48             | 3      | 2.96  | 0.58        | IGGHLPGVHYIR                    | LYK   | rep3      |
| 660.1939 | 1318.3721 | 1318.5317 | 121.06           | 2      | 2.58  | 1.1         | IGGHLPGVHYIR                    | LYT   | rep2      |
| 482.3655 | 1444.073  | 1443.5916 | 333.47           | 3      | 1.86  | 0.25        | LPGFHTCVGGGGER : +57.05000 (C7) | LYK   | rep2      |
| 722.5818 | 1443.148  | 1443.5916 | 307.28           | 2      | 1.47  | 0.71        | LPGFHTCVGGGGER : +57.05000 (C7) | LYT   | rep3      |

**Matching Genes:**

[NP\\_564818.1](#) (monodehydroascorbate reductase, putative [Arabidopsis thaliana])



---

**Protein Group 218****Expression Quality:**

| Group                 | Group Probability | Num Peptides | % Seq Coverage | Num Spectra |
|-----------------------|-------------------|--------------|----------------|-------------|
| Total (Non-Redundant) | 1                 | 2            | 19.55          | 8.0         |

**Peptides:**

| Observed | Mr(expt)  | Mr(calc)  | Mass Error (ppm) | Charge | Score | Score Delta | Peptide           | Group | Replicate |
|----------|-----------|-----------|------------------|--------|-------|-------------|-------------------|-------|-----------|
| 691.2849 | 2070.8313 | 2070.405  | 205.87           | 3      | 4.37  | 1.74        | FVVHNTSELELLMMHNR | LYK   | rep3      |
| 691.2682 | 2070.7811 | 2070.405  | 181.64           | 3      | 1.59  | 0.34        | FVVHNTSELELLMMHNR | LYT   | rep3      |
| 369.0834 | 1104.2268 | 1103.2779 | 860.06           | 3      | 2.89  | 0.77        | HYLPNGFKK         | LYK   | rep3      |
| 368.7832 | 1103.3261 | 1103.2779 | 43.68            | 3      | 1.76  | 0.05        | HYLPNGFKK         | LYT   | rep2      |

**Matching Genes:**

[NP\\_193544.1](#) (60S ribosomal protein L32 (RPL32A) [Arabidopsis thaliana])

---

**Protein Group 219****Expression Quality:**

| Group                 | Group Probability | Num Peptides | % Seq Coverage | Num Spectra |
|-----------------------|-------------------|--------------|----------------|-------------|
| Total (Non-Redundant) | 1                 | 2            | 10.82          | 7.0         |

**Peptides:**

| Observed  | Mr(expt)  | Mr(calc)  | Mass Error (ppm) | Charge | Score | Score Delta | Peptide                        | Group | Replicate |
|-----------|-----------|-----------|------------------|--------|-------|-------------|--------------------------------|-------|-----------|
| 1116.5055 | 3346.493  | 3347.7673 | 380.65           | 3      | 5.53  | 3.66        | FSVNGKPIYHFMGTSTFSQYTVVHDVSVAK | LYK   | rep1      |
| 1117.0072 | 3347.9981 | 3347.7673 | 68.94            | 3      | 4.23  | 2.49        | FSVNGKPIYHFMGTSTFSQYTVVHDVSVAK | LYT   | rep3      |
| 640.1175  | 1278.2193 | 1278.461  | 189.11           | 2      | 1.73  | 0.52        | KFGVNEFVNP                     | LYK   | rep2      |
| 639.7356  | 1277.4556 | 1278.461  | 786.45           | 2      | 1.11  | 0.01        | KFGVNEFVNP                     | LYT   | rep1      |

**Matching Genes:**

[NP\\_199207.1](#) (ADH2 (ALCOHOL DEHYDROGENASE 2); formaldehyde dehydrogenase (glutathione) [Arabidopsis thaliana])

---

**Protein Group 220**

**Expression Quality:**

| Group                 | Group Probability | Num Peptides | % Seq Coverage | Num Spectra |
|-----------------------|-------------------|--------------|----------------|-------------|
| Total (Non-Redundant) | 1                 | 3            | 10.86          | 16.0        |

**Peptides:**

| Observed | Mr(expt)  | Mr(calc)  | Mass Error (ppm) | Charge | Score | Score Delta | Peptide          | Group | Replicate |
|----------|-----------|-----------|------------------|--------|-------|-------------|------------------|-------|-----------|
| 431.299  | 1290.8736 | 1290.4335 | 341.05           | 3      | 3.87  | 1.55        | HITGSNIGGHAVK    | LYK   | rep3      |
| 431.3528 | 1291.0351 | 1290.4335 | 466.2            | 3      | 2.77  | 0.95        | HITGSNIGGHAVK    | LYT   | rep3      |
| 593.1453 | 1184.2749 | 1184.303  | 23.67            | 2      | 1.71  | 0.25        | HYSVSTYTVK       | LYT   | rep3      |
| 592.8736 | 1183.7315 | 1184.303  | 482.55           | 2      | 1.55  | 0.25        | HYSVSTYTVK       | LYK   | rep2      |
| 592.3463 | 1774.0155 | 1774.0791 | 35.86            | 3      | 1.65  | 0.53        | KHFLGVPIVSHDPSLK | LYT   | rep3      |

**Matching Genes:**

[NP\\_567215.1](#) (cathepsin B-like cysteine protease, putative [Arabidopsis thaliana])

---

**Protein Group 221**

**Expression Quality:**

| Group                 | Group Probability | Num Peptides | % Seq Coverage | Num Spectra |
|-----------------------|-------------------|--------------|----------------|-------------|
| Total (Non-Redundant) | 1                 | 3            | 13.23          | 4.0         |

**Peptides:**

| Observed | Mr(expt)  | Mr(calc)  | Mass Error (ppm) | Charge | Score | Score Delta | Peptide              | Group | Replicate |
|----------|-----------|-----------|------------------|--------|-------|-------------|----------------------|-------|-----------|
| 718.0066 | 2150.9963 | 2151.3928 | 184.3            | 3      | 2.95  | 0.78        | AGSVEPAHHHTFGHDLVVIK | LYT   | rep3      |
| 717.9933 | 2150.9564 | 2151.3928 | 202.86           | 3      | 2.65  | 0.96        | AGSVEPAHHHTFGHDLVVIK | LYK   | rep2      |

|          |           |           |        |   |      |      |                        |     |      |
|----------|-----------|-----------|--------|---|------|------|------------------------|-----|------|
| 809.6989 | 2426.0731 | 2426.7405 | 275.01 | 3 | 2.67 | 0.81 | FKAGSVEPAHHHTFGHDLVVIK | LYK | rep3 |
| 662.3551 | 1984.0418 | 1983.2142 | 417.31 | 3 | 1.58 | 0.3  | FPGVYAATCLSVEDAVNAR    | LYK | rep1 |

**Matching Genes:**

[NP\\_566241.1](#) (DRT102 (DNA-DAMAGE-REPAIR/TOLERATION 2) [Arabidopsis thaliana])

**Protein Group 222**

**Expression Quality:**

| Group                 | Group Probability | Num Peptides | % Seq Coverage | Num Spectra |
|-----------------------|-------------------|--------------|----------------|-------------|
| Total (Non-Redundant) | 1                 | 2            | 20.88          | 6.0         |

**Peptides:**

| Observed | Mr(expt)  | Mr(calc)  | Mass Error (ppm) | Charge | Score | Score Delta | Peptide                                                     | Group | Replicate |
|----------|-----------|-----------|------------------|--------|-------|-------------|-------------------------------------------------------------|-------|-----------|
| 905.8519 | 2714.5323 | 2715.963  | 526.78           | 3      | 4.94  | 2.79        | HACPSSFTFAHDSPSLMHDCASPR : +57.05000 (C3); +57.05000 (C 20) | LYK   | rep3      |
| 905.9386 | 2714.7923 | 2715.963  | 431.05           | 3      | 4.75  | 2.57        | HACPSSFTFAHDSPSLMHDCASPR : +57.05000 (C3); +57.05000 (C20)  | LYT   | rep3      |
| 1055.14  | 3162.3966 | 3162.6739 | 87.69            | 3      | 2.24  | 0.68        | LFLTVVNNCPFTVWP AIQPNAGHPVLEK : +57.05000 (C9)              | LYT   | rep1      |

**Matching Genes:**

[NP\\_180445.1](#) (osmotin-like protein, putative [Arabidopsis thaliana])

**Protein Group 223**

**Expression Quality:**

| Group                 | Group Probability | Num Peptides | % Seq Coverage | Num Spectra |
|-----------------------|-------------------|--------------|----------------|-------------|
| Total (Non-Redundant) | 1                 | 3            | 11.29          | 7.0         |

**Peptides:**

| Observed | Mr(expt) | Mr(calc) | Mass Error (ppm) | Charge | Score | Score Delta | Peptide | Group | Replicate |
|----------|----------|----------|------------------|--------|-------|-------------|---------|-------|-----------|
|----------|----------|----------|------------------|--------|-------|-------------|---------|-------|-----------|

|          |           |           |        |   |      |      |                  |     |      |
|----------|-----------|-----------|--------|---|------|------|------------------|-----|------|
| 915.4551 | 1828.8946 | 1829.0716 | 96.81  | 2 | 3.39 | 1.85 | EHVEAWKPIVDAVHAK | LYT | rep3 |
| 610.714  | 1829.1185 | 1829.0716 | 25.61  | 3 | 2.88 | 1.47 | EHVEAWKPIVDAVHAK | LYK | rep2 |
| 576.9706 | 1727.8883 | 1727.9656 | 44.73  | 3 | 2.36 | 0.74 | RLGIEEIPGIVNDFR  | LYT | rep1 |
| 453.1508 | 1356.4288 | 1356.5766 | 108.99 | 3 | 1.41 | 0.26 | WFLANPDLPKR      | LYT | rep1 |

**Matching Genes:**

[NP\\_177794.1](#) (OPR1 (12-oxophytodienoate reductase 1); 12-oxophytodienoate reductase [Arabidopsis thaliana])

**Protein Group 224**

**Expression Quality:**

| Group                 | Group Probability | Num Peptides | % Seq Coverage | Num Spectra |
|-----------------------|-------------------|--------------|----------------|-------------|
| Total (Non-Redundant) | 1                 | 2            | 26.85          | 9.0         |

**Peptides:**

| Observed  | Mr(expt)  | Mr(calc)  | Mass Error (ppm) | Charge | Score | Score Delta | Peptide                                                                         | Group | Replicate |
|-----------|-----------|-----------|------------------|--------|-------|-------------|---------------------------------------------------------------------------------|-------|-----------|
| 736.0918  | 1470.168  | 1470.6749 | 344.68           | 2      | 3.6   | 1.72        | AFVVHELKDDLK                                                                    | LYT   | rep3      |
| 736.0313  | 1470.0469 | 1470.6749 | 427.02           | 2      | 2.32  | 0.51        | AFVVHELKDDLK                                                                    | LYK   | rep2      |
| 1643.8427 | 4928.5045 | 4929.2951 | 160.39           | 3      | 3.53  | 1.51        | ITGLTPGPHGFHLHEFGDTTNGCISTGPHFNPNNMTHGAPEDCR : +57.05000 (C23); +57.05000 (C44) | LYK   | rep2      |

**Matching Genes:**

[NP\\_565666.1](#) (CSD2 (COPPER/ZINC SUPEROXIDE DISMUTASE 2); copper, zinc superoxide dismutase [Arabidopsis thaliana])

**Protein Group 225**

**Expression Quality:**

| Group | Group Probability | Num Peptides | % Seq Coverage | Num Spectra |
|-------|-------------------|--------------|----------------|-------------|
|-------|-------------------|--------------|----------------|-------------|

|                       |   |   |       |     |
|-----------------------|---|---|-------|-----|
| Total (Non-Redundant) | 1 | 2 | 21.57 | 7.0 |
|-----------------------|---|---|-------|-----|

**Peptides:**

| Observed  | Mr(expt)  | Mr(calc)  | Mass Error (ppm) | Charge | Score | Score Delta | Peptide                           | Group | Replicate |
|-----------|-----------|-----------|------------------|--------|-------|-------------|-----------------------------------|-------|-----------|
| 1121.2169 | 3360.6273 | 3362.6338 | 596.7            | 3      | 3.56  | 1.62        | SENHLVPEAIGHLIQGVTVHDGDWDSHGTIK   | LYK   | rep3      |
| 1121.7782 | 3362.3111 | 3362.6338 | 95.95            | 3      | 2.91  | 1           | SENHLVPEAIGHLIQGVTVHDGDWDSHGTIK   | LYT   | rep3      |
| 1235.827  | 3704.4576 | 3705.031  | 154.76           | 3      | 3.55  | 1.52        | WRSENHLVPEAIGHLIQGVTVHDGDWDSHGTIK | LYT   | rep2      |
| 1235.4891 | 3703.4439 | 3705.031  | 428.35           | 3      | 1.94  | 0.25        | WRSENHLVPEAIGHLIQGVTVHDGDWDSHGTIK | LYK   | rep1      |

**Matching Genes:**

[NP\\_172949.1](#) (major latex protein-related / MLP-related [Arabidopsis thaliana])

**Protein Group 226**

**Expression Quality:**

| Group                 | Group Probability | Num Peptides | % Seq Coverage | Num Spectra |
|-----------------------|-------------------|--------------|----------------|-------------|
| Total (Non-Redundant) | 1                 | 2            | 12.89          | 14.0        |

**Peptides:**

| Observed | Mr(expt)  | Mr(calc)  | Mass Error (ppm) | Charge | Score | Score Delta | Peptide          | Group | Replicate |
|----------|-----------|-----------|------------------|--------|-------|-------------|------------------|-------|-----------|
| 709.1082 | 1416.2007 | 1416.536  | 236.69           | 2      | 3.52  | 1.44        | KGETPETAVVEEK    | LYK   | rep3      |
| 709.0804 | 1416.1451 | 1416.536  | 275.99           | 2      | 3.24  | 1.18        | KGETPETAVVEEK    | LYT   | rep3      |
| 883.6183 | 1765.221  | 1765.8314 | 345.69           | 2      | 3.5   | 1.54        | TEGTSGEKEEIVEETK | LYT   | rep3      |

**Matching Genes:**

[NP\\_001031676.1](#) (DREPP plasma membrane polypeptide family protein [Arabidopsis thaliana])

**Protein Group 227**

**Expression Quality:**

| Group                 | Group Probability | Num Peptides | % Seq Coverage | Num Spectra |
|-----------------------|-------------------|--------------|----------------|-------------|
| Total (Non-Redundant) | 1                 | 1            | 5.42           | 5.0         |

**Peptides:**

| Observed | Mr(expt)  | Mr(calc)  | Mass Error (ppm) | Charge | Score | Score Delta | Peptide                   | Group | Replicate |
|----------|-----------|-----------|------------------|--------|-------|-------------|---------------------------|-------|-----------|
| 946.7947 | 2837.3606 | 2839.1538 | 631.61           | 3      | 6.95  | 4.02        | ASHMAHVYDFYKPNLASEYPVVDGK | LYK   | rep3      |
| 947.2057 | 2838.5936 | 2839.1538 | 197.31           | 3      | 5.86  | 3.62        | ASHMAHVYDFYKPNLASEYPVVDGK | LYT   | rep3      |

**Matching Genes:**

[NP\\_192919.1](#) (BAP1 (hydroxymethylglutaryl-CoA synthase) [Arabidopsis thaliana])

**Protein Group 228**

**Expression Quality:**

| Group                 | Group Probability | Num Peptides | % Seq Coverage | Num Spectra |
|-----------------------|-------------------|--------------|----------------|-------------|
| Total (Non-Redundant) | 1                 | 2            | 19.87          | 8.0         |

**Peptides:**

| Observed | Mr(expt)  | Mr(calc)  | Mass Error (ppm) | Charge | Score | Score Delta | Peptide           | Group | Replicate |
|----------|-----------|-----------|------------------|--------|-------|-------------|-------------------|-------|-----------|
| 639.6732 | 1915.9962 | 1916.1892 | 100.73           | 3      | 3.47  | 1.48        | AHGLAPEIPEDLYHLIK | LYK   | rep2      |
| 639.5927 | 1915.7545 | 1916.1892 | 226.87           | 3      | 1.89  | 0.49        | AHGLAPEIPEDLYHLIK | LYT   | rep1      |
| 461.4479 | 1381.3202 | 1381.6692 | 252.61           | 3      | 3.44  | 0.57        | KGLTPSQIGVILR     | LYT   | rep1      |
| 691.5262 | 1381.0367 | 1381.6692 | 457.79           | 2      | 1.95  | 0.91        | KGLTPSQIGVILR     | LYK   | rep1      |

**Matching Genes:**

[NP\\_567104.1](#) (40S ribosomal protein S13 (RPS13A) [Arabidopsis thaliana])

**Protein Group 229**

**Expression Quality:**

| Group                 | Group Probability | Num Peptides | % Seq Coverage | Num Spectra |
|-----------------------|-------------------|--------------|----------------|-------------|
| Total (Non-Redundant) | 1                 | 2            | 10.46          | 4.0         |

**Peptides:**

| Observed  | Mr(expt)  | Mr(calc)  | Mass Error (ppm) | Charge | Score | Score Delta | Peptide               | Group | Replicate |
|-----------|-----------|-----------|------------------|--------|-------|-------------|-----------------------|-------|-----------|
| 505.5201  | 1513.5369 | 1513.7429 | 136.06           | 3      | 2.83  | 1.13        | FSLEETVAILHVR         | LYT   | rep3      |
| 505.6613  | 1513.9603 | 1513.7429 | 143.6            | 3      | 2.33  | 0.74        | FSLEETVAILHVR         | LYK   | rep2      |
| 718.4138  | 2152.218  | 2151.4709 | 347.22           | 3      | 4.05  | 2.05        | LEGTIGFGKPTADVSAIHIPK | LYK   | rep2      |
| 1076.0777 | 2150.1397 | 2151.4709 | 618.76           | 2      | 2.53  | 1.08        | LEGTIGFGKPTADVSAIHIPK | LYT   | rep1      |

**Matching Genes:**

[NP\\_181934.1](#) (late embryogenesis abundant family protein / LEA family protein [Arabidopsis thaliana])

---

**Protein Group 230****Expression Quality:**

| Group                 | Group Probability | Num Peptides | % Seq Coverage | Num Spectra |
|-----------------------|-------------------|--------------|----------------|-------------|
| Total (Non-Redundant) | 1                 | 2            | 31.61          | 4.0         |

**Peptides:**

| Observed  | Mr(expt)  | Mr(calc)  | Mass Error (ppm) | Charge | Score | Score Delta | Peptide                            | Group | Replicate |
|-----------|-----------|-----------|------------------|--------|-------|-------------|------------------------------------|-------|-----------|
| 742.256   | 1482.4964 | 1482.5115 | 10.18            | 2      | 1.99  | 0.53        | KDDEESGGGLGGYAK                    | LYK   | rep3      |
| 1147.3578 | 3439.0499 | 3439.5808 | 154.35           | 3      | 4.78  | 2.93        | YLNDYESSHSTGAGGPPPPTSQAEPASQPEPAAK | LYT   | rep1      |
| 1147.3246 | 3438.9503 | 3439.5808 | 183.31           | 3      | 2.85  | 1.36        | YLNDYESSHSTGAGGPPPPTSQAEPASQPEPAAK | LYK   | rep2      |

**Matching Genes:**

[NP\\_563934.1](#) (unknown protein [Arabidopsis thaliana])

---

**Protein Group 231****Expression Quality:**

| Group                 | Group Probability | Num Peptides | % Seq Coverage | Num Spectra |
|-----------------------|-------------------|--------------|----------------|-------------|
| Total (Non-Redundant) | 1                 | 3            | 9.96           | 6.0         |

**Peptides:**

| Observed | Mr(expt)  | Mr(calc)  | Mass Error (ppm) | Charge | Score | Score Delta | Peptide                     | Group | Replicate |
|----------|-----------|-----------|------------------|--------|-------|-------------|-----------------------------|-------|-----------|
| 545.0392 | 1088.0628 | 1088.3015 | 219.35           | 2      | 2.09  | 0.3         | FKDEIIPVK                   | LYT   | rep1      |
| 546.166  | 1090.3164 | 1088.3015 | 1851.45          | 2      | 1.51  | 0.19        | FKDEIIPVK                   | LYK   | rep2      |
| 537.1084 | 1072.2012 | 1072.2604 | 55.17            | 2      | 2.28  | 0.7         | KVEAQGLLSK                  | LYT   | rep1      |
| 877.3345 | 2628.9799 | 2630.0002 | 387.94           | 3      | 2.36  | 0.68        | LGLDPEKINVNGGAMAIGHPLGATGAR | LYK   | rep1      |
| 877.6478 | 2629.92   | 2630.0002 | 30.5             | 3      | 1.49  | 0.44        | LGLDPEKINVNGGAMAIGHPLGATGAR | LYT   | rep2      |

**Matching Genes:**

[NP\\_180873.1](#) (PED1 (PEROXISOME DEFECTIVE 1); acetyl-CoA C-acyltransferase [Arabidopsis thaliana])

**Protein Group 232****Expression Quality:**

| Group                 | Group Probability | Num Peptides | % Seq Coverage | Num Spectra |
|-----------------------|-------------------|--------------|----------------|-------------|
| Total (Non-Redundant) | 1                 | 2            | 14.46          | 9.0         |

**Peptides:**

| Observed  | Mr(expt)  | Mr(calc)  | Mass Error (ppm) | Charge | Score | Score Delta | Peptide                                | Group | Replicate |
|-----------|-----------|-----------|------------------|--------|-------|-------------|----------------------------------------|-------|-----------|
| 1215.8313 | 2429.647  | 2429.8012 | 63.48            | 2      | 4.45  | 2.21        | HGIICTEDLIHEILTVGPHFK : +57.05000 (C5) | LYT   | rep1      |
| 810.7758  | 2429.3038 | 2429.8012 | 204.73           | 3      | 4.39  | 2.33        | HGIICTEDLIHEILTVGPHFK : +57.05000 (C5) | LYK   | rep1      |
| 842.0565  | 1682.0974 | 1682.9232 | 490.67           | 2      | 2.28  | 0.92        | RVEPYVTYGFPNLK                         | LYT   | rep1      |

**Matching Genes:**

[NP\\_178234.1](#) (60S ribosomal protein L7 (RPL7B) [Arabidopsis thaliana])



---

**Protein Group 233****Expression Quality:**

| Group                 | Group Probability | Num Peptides | % Seq Coverage | Num Spectra |
|-----------------------|-------------------|--------------|----------------|-------------|
| Total (Non-Redundant) | 0.98              | 2            | 6.3            | 17.0        |

**Peptides:**

| Observed | Mr(expt)  | Mr(calc)  | Mass Error (ppm) | Charge | Score | Score Delta | Peptide                          | Group | Replicate |
|----------|-----------|-----------|------------------|--------|-------|-------------|----------------------------------|-------|-----------|
| 635.8989 | 1904.6733 | 1904.1654 | 266.74           | 3      | 1.52  | 0.57        | HSPFFAGYRPQFYMR                  | LYT   | rep3      |
| 635.7235 | 1904.1471 | 1904.1654 | 9.63             | 3      | 1.44  | 0.19        | HSPFFAGYRPQFYMR                  | LYK   | rep2      |
| 590.6725 | 1768.994  | 1768.9119 | 46.39            | 3      | 5.2   | 2.95        | HYAHVDCPGHADYVK : +57.05000 (C7) | LYT   | rep3      |
| 590.6534 | 1768.9369 | 1768.9119 | 14.1             | 3      | 5.2   | 2.86        | HYAHVDCPGHADYVK : +57.05000 (C7) | LYK   | rep1      |

**Matching Genes:**

[NP\\_193769.1](#) (AtRABE1b/AtRab8D (Arabidopsis Rab GTPase homolog E1b); translation elongation factor [Arabidopsis thaliana])

---

**Protein Group 234****Expression Quality:**

| Group                 | Group Probability | Num Peptides | % Seq Coverage | Num Spectra |
|-----------------------|-------------------|--------------|----------------|-------------|
| Total (Non-Redundant) | 1                 | 2            | 10.43          | 4.0         |

**Peptides:**

| Observed  | Mr(expt)  | Mr(calc)  | Mass Error (ppm) | Charge | Score | Score Delta | Peptide                                   | Group | Replicate |
|-----------|-----------|-----------|------------------|--------|-------|-------------|-------------------------------------------|-------|-----------|
| 1060.7843 | 3179.3294 | 3180.3735 | 328.29           | 3      | 2.1   | 0.54        | GGWPTWSGDSTVFFHHQADDGWSIFR                | LYK   | rep3      |
| 1627.411  | 4879.2096 | 4879.2471 | 7.69             | 3      | 4.58  | 3           | HIEIYDLENTTFQPVTESLNPSFHHYNPFVSPDSEFLGYHR | LYT   | rep3      |
| 1627.514  | 4879.5186 | 4879.2471 | 55.66            | 3      | 4.38  | 2.76        | HIEIYDLENTTFQPVTESLNPSFHHYNPFVSPDSEFLGYHR | LYK   | rep2      |

**Matching Genes:**

[NP\\_192096.1](#) (tolB protein-related [Arabidopsis thaliana])

---

### Protein Group 235

#### Expression Quality:

| Group                 | Group Probability | Num Peptides | % Seq Coverage | Num Spectra |
|-----------------------|-------------------|--------------|----------------|-------------|
| Total (Non-Redundant) | 1                 | 2            | 13.86          | 29.0        |

#### Peptides:

| Observed | Mr(expt)  | Mr(calc)  | Mass Error (ppm) | Charge | Score | Score Delta | Peptide                                            | Group | Replicate |
|----------|-----------|-----------|------------------|--------|-------|-------------|----------------------------------------------------|-------|-----------|
| 941.6618 | 1881.3079 | 1882.1336 | 438.68           | 2      | 3.78  | 2.33        | TVGINYFICSTPGHCR : +57.05000 (C9); +57.05000 (C15) | LYT   | rep1      |
| 941.7246 | 1881.4336 | 1882.1336 | 371.88           | 2      | 2.96  | 1.64        | TVGINYFICSTPGHCR : +57.05000 (C9); +57.05000 (C15) | LYK   | rep1      |
| 654.0279 | 1306.0401 | 1306.3834 | 262.81           | 2      | 2.87  | 1.11        | YGSSHTVDVVDK                                       | LYT   | rep2      |
| 653.9441 | 1305.8726 | 1306.3834 | 391.02           | 2      | 2.39  | 0.88        | YGSSHTVDVVDK                                       | LYK   | rep2      |

#### Matching Genes:

[NP\\_182006.1](#) (UCC2 (UCLACYANIN 2); copper ion binding [Arabidopsis thaliana])

---

### Protein Group 236

#### Expression Quality:

| Group                 | Group Probability | Num Peptides | % Seq Coverage | Num Spectra |
|-----------------------|-------------------|--------------|----------------|-------------|
| Total (Non-Redundant) | 1                 | 2            | 6.09           | 5.0         |

#### Peptides:

| Observed | Mr(expt)  | Mr(calc)  | Mass Error (ppm) | Charge | Score | Score Delta | Peptide                 | Group | Replicate |
|----------|-----------|-----------|------------------|--------|-------|-------------|-------------------------|-------|-----------|
| 817.8196 | 2450.4353 | 2450.5779 | 58.19            | 3      | 3.41  | 1.97        | HVVDEPANEEKPSESSAALSPEK | LYT   | rep1      |
| 694.3258 | 2079.9539 | 2080.2185 | 127.18           | 3      | 3.24  | 1.73        | HVVEEPLKDEQENVSEAK      | LYT   | rep1      |
| 694.2919 | 2079.8521 | 2080.2185 | 176.12           | 3      | 2.82  | 1.25        | HVVEEPLKDEQENVSEAK      | LYK   | rep2      |

**Matching Genes:**

[NP\\_187241.2](#) (neurofilament protein-related [Arabidopsis thaliana])

---

**Protein Group 237****Expression Quality:**

| Group                 | Group Probability | Num Peptides | % Seq Coverage | Num Spectra |
|-----------------------|-------------------|--------------|----------------|-------------|
| Total (Non-Redundant) | 1                 | 2            | 12.14          | 4.0         |

**Peptides:**

| Observed | Mr(expt)  | Mr(calc)  | Mass Error (ppm) | Charge | Score | Score Delta | Peptide                                                       | Group | Replicate |
|----------|-----------|-----------|------------------|--------|-------|-------------|---------------------------------------------------------------|-------|-----------|
| 1020.043 | 3057.1054 | 3058.4613 | 443.32           | 3      | 4.26  | 2.3         | KGCTPAQLALAWVHHQGDDVCPGTTK : +57.05000 (C3); +57.0500 0 (C21) | LYT   | rep1      |
| 612.8365 | 1835.4862 | 1836.0861 | 326.73           | 3      | 2.35  | 0.88        | RLDIACIDLYYQHR : +57.05000 (C6)                               | LYT   | rep3      |
| 612.7855 | 1835.3331 | 1836.0861 | 410.1            | 3      | 1.74  | 0.41        | RLDIACIDLYYQHR : +57.05000 (C6)                               | LYK   | rep1      |

**Matching Genes:**

[NP\\_176267.3](#) (AGD2 (ARF-GAP DOMAIN 2); aldo-keto reductase [Arabidopsis thaliana])

---

**Protein Group 238****Expression Quality:**

| Group                 | Group Probability | Num Peptides | % Seq Coverage | Num Spectra |
|-----------------------|-------------------|--------------|----------------|-------------|
| Total (Non-Redundant) | 1                 | 2            | 17.35          | 22.0        |

**Peptides:**

| Observed | Mr(expt)  | Mr(calc)  | Mass Error (ppm) | Charge | Score | Score Delta | Peptide      | Group | Replicate |
|----------|-----------|-----------|------------------|--------|-------|-------------|--------------|-------|-----------|
| 576.5093 | 1151.003  | 1151.2777 | 238.63           | 2      | 3.26  | 1.43        | IGDALHIGGGNK | LYT   | rep3      |
| 576.6607 | 1151.3057 | 1151.2777 | 24.32            | 2      | 2.94  | 1.21        | IGDALHIGGGNK | LYK   | rep3      |

|          |           |           |        |   |      |      |                   |     |      |
|----------|-----------|-----------|--------|---|------|------|-------------------|-----|------|
| 578.2056 | 1731.5932 | 1731.8712 | 160.51 | 3 | 3.31 | 1.66 | IGDALHIGGGNKEGEHK | LYT | rep3 |
|----------|-----------|-----------|--------|---|------|------|-------------------|-----|------|

**Matching Genes:**

[NP\\_175843.1](#) (dehydrin family protein [Arabidopsis thaliana])

**Protein Group 239**

**Expression Quality:**

| Group                 | Group Probability | Num Peptides | % Seq Coverage | Num Spectra |
|-----------------------|-------------------|--------------|----------------|-------------|
| Total (Non-Redundant) | 1                 | 1            | 13.59          | 7.0         |

**Peptides:**

| Observed | Mr(expt)  | Mr(calc) | Mass Error (ppm) | Charge | Score | Score Delta | Peptide                      | Group | Replicate |
|----------|-----------|----------|------------------|--------|-------|-------------|------------------------------|-------|-----------|
| 983.2428 | 2946.7049 | 2947.383 | 230.08           | 3      | 6.56  | 3.33        | SMTQHNVGALVVVKPGEQQALAGIITER | LYK   | rep3      |
| 983.545  | 2947.6117 | 2947.383 | 77.56            | 3      | 5.49  | 2.03        | SMTQHNVGALVVVKPGEQQALAGIITER | LYT   | rep3      |

**Matching Genes:**

[NP\\_196647.1](#) (CBS domain-containing protein [Arabidopsis thaliana])

**Protein Group 240**

**Expression Quality:**

| Group                 | Group Probability | Num Peptides | % Seq Coverage | Num Spectra |
|-----------------------|-------------------|--------------|----------------|-------------|
| Total (Non-Redundant) | 1                 | 3            | 7.07           | 8.0         |

**Peptides:**

| Observed  | Mr(expt)  | Mr(calc)  | Mass Error (ppm) | Charge | Score | Score Delta | Peptide                       | Group | Replicate |
|-----------|-----------|-----------|------------------|--------|-------|-------------|-------------------------------|-------|-----------|
| 779.741   | 1557.4663 | 1557.5815 | 73.95            | 2      | 1.63  | 0.41        | SGEDADTLGLTGHER               | LYK   | rep1      |
| 1057.7643 | 3170.2694 | 3170.6128 | 108.31           | 3      | 2.39  | 0.42        | WGSTAFQNMLVVPPGSGIVHQVNLEYLGR | LYT   | rep2      |
| 957.9995  | 2870.9751 | 2871.1289 | 53.58            | 3      | 2.53  | 1.06        | YTIHLPTDISEIRPGQDVTVTDDNGK    | LYK   | rep2      |

|          |         |           |        |   |      |      |                            |     |      |
|----------|---------|-----------|--------|---|------|------|----------------------------|-----|------|
| 957.7878 | 2870.34 | 2871.1289 | 274.75 | 3 | 1.85 | 0.66 | YTIHLPTDISEIRPGQDVTVTDDNGK | LYT | rep2 |
|----------|---------|-----------|--------|---|------|------|----------------------------|-----|------|

**Matching Genes:**

[NP\\_178634.2](#) (aconitate hydratase, cytoplasmic, putative / citrate hydro-lyase/aconitase, putative [Arabidopsis thaliana])

**Protein Group 241**

**Expression Quality:**

| Group                 | Group Probability | Num Peptides | % Seq Coverage | Num Spectra |
|-----------------------|-------------------|--------------|----------------|-------------|
| Total (Non-Redundant) | 0.99              | 4            | 15.35          | 4.0         |

**Peptides:**

| Observed  | Mr(expt)  | Mr(calc)  | Mass Error (ppm) | Charge | Score | Score Delta | Peptide                                 | Group | Replicate |
|-----------|-----------|-----------|------------------|--------|-------|-------------|-----------------------------------------|-------|-----------|
| 634.8925  | 1901.6539 | 1902.098  | 233.48           | 3      | 1.37  | 0.47        | DIVNIVACEGEERIER : +57.05000 (C8)       | LYT   | rep2      |
| 903.7233  | 2708.1463 | 2708.0436 | 37.93            | 3      | 1.93  | 0.28        | EEMGELHFCWEEKSLIVASAWR : +57.05000 (C9) | LYT   | rep1      |
| 921.1199  | 1840.2242 | 1842.155  | 1048.16          | 2      | 1.26  | 0.37        | IAAYMVEGLAARMAASGK : +32.00000 (M5)     | LYK   | rep3      |
| 1276.4738 | 3826.3978 | 3826.0691 | 85.91            | 3      | 1.92  | 0.47        | YFLDSPTDEFVQHPIGSGASVSSFGSLDSFPYQSR     | LYT   | rep2      |

**Matching Genes:**

[NP\\_173566.1](#) (SCL1 (SCARECROW-LIKE 1); transcription factor [Arabidopsis thaliana])

**Protein Group 242**

**Expression Quality:**

| Group                 | Group Probability | Num Peptides | % Seq Coverage | Num Spectra |
|-----------------------|-------------------|--------------|----------------|-------------|
| Total (Non-Redundant) | 1                 | 2            | 6.62           | 7.0         |

**Peptides:**

| Observed | Mr(expt)  | Mr(calc)  | Mass Error (ppm) | Charge | Score | Score Delta | Peptide       | Group | Replicate |
|----------|-----------|-----------|------------------|--------|-------|-------------|---------------|-------|-----------|
| 485.569  | 1453.6836 | 1453.6044 | 54.52            | 3      | 3.48  | 1.64        | KIEFPHPTTEEAR | LYK   | rep3      |

|          |           |           |        |   |      |      |                  |     |      |
|----------|-----------|-----------|--------|---|------|------|------------------|-----|------|
| 485.3573 | 1453.0484 | 1453.6044 | 382.45 | 3 | 2.57 | 1.05 | KIEFPHPTEEAR     | LYT | rep2 |
| 617.3102 | 1848.9071 | 1849.2076 | 162.54 | 3 | 2.98 | 1.2  | QIQELVEAIVLPMTHK | LYT | rep1 |

**Matching Genes:**

[NP\\_172384.1](#) (RPT5B (26S PROTEASOME AAA-ATPASE SUBUNIT RPT5B); ATPase/ calmodulin binding [Arabidopsis thaliana])

**Protein Group 243**

**Expression Quality:**

| Group                 | Group Probability | Num Peptides | % Seq Coverage | Num Spectra |
|-----------------------|-------------------|--------------|----------------|-------------|
| Total (Non-Redundant) | 1                 | 2            | 10.13          | 6.0         |

**Peptides:**

| Observed  | Mr(expt)  | Mr(calc)  | Mass Error (ppm) | Charge | Score | Score Delta | Peptide                        | Group | Replicate |
|-----------|-----------|-----------|------------------|--------|-------|-------------|--------------------------------|-------|-----------|
| 1088.7579 | 3263.2503 | 3263.5405 | 88.92            | 3      | 3.3   | 1.96        | ADGPAGILAIGTANPENHVLQAEYPDYYFR | LYK   | rep2      |
| 644.2632  | 1286.5108 | 1284.4891 | 1573.9           | 2      | 3.12  | 1.32        | HMHLTEEFK                      | LYK   | rep2      |
| 429.1258  | 1284.3539 | 1284.4891 | 105.27           | 3      | 2.97  | 0.36        | HMHLTEEFK                      | LYT   | rep1      |

**Matching Genes:**

[NP\\_196897.1](#) (CHS (CHALCONE SYNTHASE); naringenin-chalcone synthase [Arabidopsis thaliana])

**Protein Group 244**

**Expression Quality:**

| Group                 | Group Probability | Num Peptides | % Seq Coverage | Num Spectra |
|-----------------------|-------------------|--------------|----------------|-------------|
| Total (Non-Redundant) | 1                 | 2            | 5.1            | 6.0         |

**Peptides:**

| Observed | Mr(expt) | Mr(calc) | Mass Error (ppm) | Charge | Score | Score Delta | Peptide | Group | Replicate |
|----------|----------|----------|------------------|--------|-------|-------------|---------|-------|-----------|
|----------|----------|----------|------------------|--------|-------|-------------|---------|-------|-----------|

|           |           |           |        |   |      |      |                                                  |     |      |
|-----------|-----------|-----------|--------|---|------|------|--------------------------------------------------|-----|------|
| 1042.2806 | 3123.8184 | 3124.6125 | 254.13 | 3 | 2.96 | 1.14 | IAVGGHSYGAFMTANLLAHAPHLFACGIAR : +57.05000 (C26) | LYK | rep1 |
| 1042.1454 | 3123.4127 | 3124.6125 | 383.99 | 3 | 2.63 | 0.88 | IAVGGHSYGAFMTANLLAHAPHLFACGIAR : +57.05000 (C26) | LYT | rep2 |
| 755.8568  | 2264.547  | 2264.6561 | 48.17  | 3 | 3.43 | 1.92 | YLLVSSLHRPYSFIVPCGR : +57.05000 (C17)            | LYK | rep2 |
| 756.3772  | 2266.1081 | 2264.6561 | 641.18 | 3 | 2.29 | 0.9  | YLLVSSLHRPYSFIVPCGR : +57.05000 (C17)            | LYT | rep3 |

**Matching Genes:**

[NP\\_850473.1](#) (serine-type peptidase [Arabidopsis thaliana])

**Protein Group 245**

**Expression Quality:**

| Group                 | Group Probability | Num Peptides | % Seq Coverage | Num Spectra |
|-----------------------|-------------------|--------------|----------------|-------------|
| Total (Non-Redundant) | 1                 | 1            | 39.02          | 4.0         |

**Peptides:**

| Observed  | Mr(expt)  | Mr(calc)  | Mass Error (ppm) | Charge | Score | Score Delta | Peptide                                            | Group | Replicate |
|-----------|-----------|-----------|------------------|--------|-------|-------------|----------------------------------------------------|-------|-----------|
| 1175.2308 | 3522.669  | 3523.9002 | 349.39           | 3      | 6.38  | 3.96        | DHASVQLNIGHLDANGLYTGQFTTFALCGFVR : +57.05000 (C28) | LYT   | rep1      |
| 1175.2721 | 3522.7928 | 3523.9002 | 314.26           | 3      | 2     | 0.65        | DHASVQLNIGHLDANGLYTGQFTTFALCGFVR : +57.05000 (C28) | LYK   | rep2      |

**Matching Genes:**

[NP\\_001078280.1](#) (40S ribosomal protein S21 (RPS21B) [Arabidopsis thaliana])

**Protein Group 246**

**Expression Quality:**

| Group                 | Group Probability | Num Peptides | % Seq Coverage | Num Spectra |
|-----------------------|-------------------|--------------|----------------|-------------|
| Total (Non-Redundant) | 1                 | 3            | 10.57          | 8.0         |

**Peptides:**

| Observed  | Mr(expt)  | Mr(calc)  | Mass Error (ppm) | Charge | Score | Score Delta | Peptide               | Group | Replicate |
|-----------|-----------|-----------|------------------|--------|-------|-------------|-----------------------|-------|-----------|
| 636.0994  | 1905.2746 | 1905.1664 | 56.82            | 3      | 2.81  | 0.66        | EFFNQGVKPGELAIISR     | LYT   | rep3      |
| 953.1446  | 1904.2735 | 1905.1664 | 468.67           | 2      | 1.78  | 0.32        | EFFNQGVKPGELAIISR     | LYK   | rep3      |
| 487.4276  | 972.8396  | 973.0874  | 254.61           | 2      | 1.55  | 0.35        | GYIHLENK              | LYK   | rep2      |
| 487.4468  | 972.878   | 973.0874  | 215.22           | 2      | 1.52  | 0.3         | GYIHLENK              | LYT   | rep2      |
| 1099.1121 | 2196.2085 | 2197.626  | 644.98           | 2      | 2     | 0.83        | TLEADIVIVGVGGRPIISLFK | LYT   | rep3      |
| 733.2118  | 2196.6119 | 2197.626  | 461.44           | 3      | 1.81  | 0.68        | TLEADIVIVGVGGRPIISLFK | LYK   | rep1      |

**Matching Genes:**

[NP\\_568125.1](#) (monodehydroascorbate reductase, putative [Arabidopsis thaliana])

**Protein Group 247**

**Expression Quality:**

| Group                 | Group Probability | Num Peptides | % Seq Coverage | Num Spectra |
|-----------------------|-------------------|--------------|----------------|-------------|
| Total (Non-Redundant) | 1                 | 3            | 5.88           | 5.0         |

**Peptides:**

| Observed | Mr(expt)  | Mr(calc)  | Mass Error (ppm) | Charge | Score | Score Delta | Peptide         | Group | Replicate |
|----------|-----------|-----------|------------------|--------|-------|-------------|-----------------|-------|-----------|
| 838.8376 | 1675.6595 | 1675.9355 | 164.73           | 2      | 2.34  | 0.44        | AVSQSKPPYVPPHLR | LYK   | rep3      |
| 566.9967 | 1131.9778 | 1132.3607 | 338.13           | 2      | 1.59  | 0.59        | HAIPILLAER      | LYT   | rep1      |
| 441.3605 | 1321.0579 | 1320.5262 | 402.65           | 3      | 2.43  | 1.19        | SHLMDLLHAQR     | LYT   | rep3      |
| 441.3964 | 1321.1656 | 1320.5262 | 484.18           | 3      | 1.43  | 0.43        | SHLMDLLHAQR     | LYK   | rep2      |

**Matching Genes:**

[NP\\_001030884.1](#) (ATP-dependent helicase [Arabidopsis thaliana])

**Protein Group 248**

**Expression Quality:**



| Group                 | Group Probability | Num Peptides | % Seq Coverage | Num Spectra |
|-----------------------|-------------------|--------------|----------------|-------------|
| Total (Non-Redundant) | 1                 | 2            | 17.69          | 5.0         |

**Peptides:**

| Observed | Mr(expt)  | Mr(calc)  | Mass Error (ppm) | Charge | Score | Score Delta | Peptide                     | Group | Replicate |
|----------|-----------|-----------|------------------|--------|-------|-------------|-----------------------------|-------|-----------|
| 992.2421 | 2973.7027 | 2973.2449 | 153.99           | 3      | 2.77  | 0.8         | FGDAANEEAGSHLTMVSTEEILLERPR | LYT   | rep1      |
| 959.2986 | 2874.8723 | 2875.186  | 109.12           | 3      | 3.58  | 1.83        | VTNLSEDTPDLMEFHPFGAVTR      | LYT   | rep3      |
| 959.5211 | 2875.5399 | 2875.186  | 123.07           | 3      | 2.43  | 0.91        | VTNLSEDTPDLMEFHPFGAVTR      | LYK   | rep2      |

**Matching Genes:**

[NP\\_187747.1](#) (EIF3G1 (eukaryotic translation initiation factor 3G1); RNA binding / translation initiation factor [Arabidopsis thaliana])

**Protein Group 249**

**Expression Quality:**

| Group                 | Group Probability | Num Peptides | % Seq Coverage | Num Spectra |
|-----------------------|-------------------|--------------|----------------|-------------|
| Total (Non-Redundant) | 1                 | 2            | 7.18           | 4.0         |

**Peptides:**

| Observed  | Mr(expt)  | Mr(calc)  | Mass Error (ppm) | Charge | Score | Score Delta | Peptide                            | Group | Replicate |
|-----------|-----------|-----------|------------------|--------|-------|-------------|------------------------------------|-------|-----------|
| 1094.8597 | 3281.5557 | 3282.5439 | 301.04           | 3      | 3.65  | 2.13        | AINTGWLHPSINQFNPEQAVDFDTPVNEK      | LYT   | rep3      |
| 1094.9061 | 3281.6949 | 3282.5439 | 258.65           | 3      | 1.8   | 0.23        | AINTGWLHPSINQFNPEQAVDFDTPVNEK      | LYK   | rep2      |
| 1137.993  | 3410.9556 | 3410.7168 | 70.03            | 3      | 2.69  | 1.33        | AINTGWLHPSINQFNPEQAVDFDTPVNEK<br>K | LYK   | rep1      |

**Matching Genes:**

[NP\\_001032018.1](#) (KAS I (3-KETOACYL-ACYL CARRIER PROTEIN SYNTHASE I); fatty-acid synthase [Arabidopsis thaliana])

**Protein Group 250****Expression Quality:**

| Group                 | Group Probability | Num Peptides | % Seq Coverage | Num Spectra |
|-----------------------|-------------------|--------------|----------------|-------------|
| Total (Non-Redundant) | 1                 | 2            | 14             | 6.0         |

**Peptides:**

| Observed | Mr(expt)  | Mr(calc)  | Mass Error (ppm) | Charge | Score | Score Delta | Peptide                             | Group | Replicate |
|----------|-----------|-----------|------------------|--------|-------|-------------|-------------------------------------|-------|-----------|
| 608.6321 | 1822.8728 | 1823.1719 | 164.07           | 3      | 2.94  | 1.01        | KIVSLDNHIALACAGLK : +57.05000 (C13) | LYT   | rep1      |
| 911.9577 | 1821.8997 | 1823.1719 | 697.79           | 2      | 2.51  | 0.66        | KIVSLDNHIALACAGLK : +57.05000 (C13) | LYK   | rep3      |
| 701.6312 | 2101.8702 | 2100.2864 | 754.1            | 3      | 3.4   | 0.89        | QLEEEEIDIIVAEIEAEK                  | LYK   | rep3      |

**Matching Genes:**

[NP\\_190694.1](#) (PAD1 (20S proteasome alpha subunit D1); peptidase [Arabidopsis thaliana])

---

**Protein Group 251****Expression Quality:**

| Group                 | Group Probability | Num Peptides | % Seq Coverage | Num Spectra |
|-----------------------|-------------------|--------------|----------------|-------------|
| Total (Non-Redundant) | 1                 | 3            | 5.41           | 3.0         |

**Peptides:**

| Observed | Mr(expt)  | Mr(calc)  | Mass Error (ppm) | Charge | Score | Score Delta | Peptide                         | Group | Replicate |
|----------|-----------|-----------|------------------|--------|-------|-------------|---------------------------------|-------|-----------|
| 851.2936 | 1700.5716 | 1700.9402 | 216.71           | 2      | 2.86  | 0.95        | IVHHIVQELLGADK                  | LYT   | rep1      |
| 444.3831 | 1330.1257 | 1330.5409 | 312.04           | 3      | 1.24  | 0.29        | PGAGGLMPGMPGTR : +32.00000 (M7) | LYK   | rep2      |
| 476.7794 | 1427.3148 | 1427.4822 | 117.26           | 3      | 2.21  | 0.25        | SRSTQPPPSGEER                   | LYK   | rep3      |

**Matching Genes:**

[NP\\_200595.2](#) (eukaryotic translation initiation factor 4F, putative / eIF-4F, putative [Arabidopsis thaliana])

---

**Protein Group 252****Expression Quality:**

| Group                 | Group Probability | Num Peptides | % Seq Coverage | Num Spectra |
|-----------------------|-------------------|--------------|----------------|-------------|
| Total (Non-Redundant) | 1                 | 1            | 10.74          | 11.0        |

**Peptides:**

| Observed  | Mr(expt)  | Mr(calc)  | Mass Error (ppm) | Charge | Score | Score Delta | Peptide                                                    | Group | Replicate |
|-----------|-----------|-----------|------------------|--------|-------|-------------|------------------------------------------------------------|-------|-----------|
| 1447.2726 | 4338.7943 | 4339.8456 | 242.25           | 3      | 6.3   | 3.08        | AAIRDPDPVVFLENELLYGESFPISSEALDSSFCLPIGK : +57.05000 (C 34) | LYK   | rep3      |
| 1447.5355 | 4339.5831 | 4339.8456 | 60.49            | 3      | 3.69  | 1.86        | AAIRDPDPVVFLENELLYGESFPISSEALDSSFCLPIGK : +57.05000 (C34)  | LYT   | rep1      |

**Matching Genes:**

[NP\\_199898.1](#) (pyruvate dehydrogenase E1 component beta subunit, mitochondrial / PDHE1-B (PDH2) [Arabidopsis thaliana])

**Protein Group 253****Expression Quality:**

| Group                 | Group Probability | Num Peptides | % Seq Coverage | Num Spectra |
|-----------------------|-------------------|--------------|----------------|-------------|
| Total (Non-Redundant) | 1                 | 2            | 14.4           | 9.0         |

**Peptides:**

| Observed  | Mr(expt)  | Mr(calc)  | Mass Error (ppm) | Charge | Score | Score Delta | Peptide                       | Group | Replicate |
|-----------|-----------|-----------|------------------|--------|-------|-------------|-------------------------------|-------|-----------|
| 958.4034  | 2872.1869 | 2873.1719 | 342.83           | 3      | 1.88  | 0.51        | MFNTEFNHIAGNPDLDLYPSHLQAK     | LYK   | rep2      |
| 1139.6205 | 3415.838  | 3417.6728 | 536.88           | 3      | 4.34  | 2.48        | QHYYGSHPSINPFGIIPHGNIDYTSPhDR | LYK   | rep3      |
| 1139.7919 | 3416.3521 | 3417.6728 | 386.43           | 3      | 3.75  | 1.89        | QHYYGSHPSINPFGIIPHGNIDYTSPhDR | LYT   | rep1      |

**Matching Genes:**

[NP\\_001031671.1](#) (unknown protein [Arabidopsis thaliana])

---

**Protein Group 254****Expression Quality:**

| Group                 | Group Probability | Num Peptides | % Seq Coverage | Num Spectra |
|-----------------------|-------------------|--------------|----------------|-------------|
| Total (Non-Redundant) | 1                 | 2            | 8.64           | 4.0         |

**Peptides:**

| Observed | Mr(expt)  | Mr(calc)  | Mass Error (ppm) | Charge | Score | Score Delta | Peptide                 | Group | Replicate |
|----------|-----------|-----------|------------------|--------|-------|-------------|-------------------------|-------|-----------|
| 817.5437 | 2449.6076 | 2449.9634 | 145.2            | 3      | 3.01  | 0.9         | LVVRPMYSSPPIHGASIVATILK | LYK   | rep2      |
| 743.5828 | 1485.1499 | 1485.6913 | 364.37           | 2      | 3.2   | 1.79        | THYHQSVIYIPK            | LYT   | rep3      |
| 743.9848 | 1485.9539 | 1485.6913 | 176.77           | 2      | 2.86  | 1.07        | THYHQSVIYIPK            | LYK   | rep2      |

**Matching Genes:**

[NP\\_197456.1](#) (ASP2 (ASPARTATE AMINOTRANSFERASE 2) [Arabidopsis thaliana])

---

**Protein Group 255****Expression Quality:**

| Group                 | Group Probability | Num Peptides | % Seq Coverage | Num Spectra |
|-----------------------|-------------------|--------------|----------------|-------------|
| Total (Non-Redundant) | 1                 | 1            | 20.51          | 7.0         |

**Peptides:**

| Observed  | Mr(expt)  | Mr(calc)  | Mass Error (ppm) | Charge | Score | Score Delta | Peptide                          | Group | Replicate |
|-----------|-----------|-----------|------------------|--------|-------|-------------|----------------------------------|-------|-----------|
| 1131.4762 | 3391.4051 | 3392.6567 | 368.92           | 3      | 6.21  | 3.61        | ATFGITDHAQDHLGDVVYVELPDVGHSVSQGK | LYK   | rep1      |
| 1131.5629 | 3391.6651 | 3392.6567 | 292.28           | 3      | 5.78  | 3.09        | ATFGITDHAQDHLGDVVYVELPDVGHSVSQGK | LYT   | rep3      |

**Matching Genes:**

[NP\\_181057.1](#) (glycine cleavage system H protein, mitochondrial, putative [Arabidopsis thaliana])

---

**Protein Group 256**

**Expression Quality:**

| Group                 | Group Probability | Num Peptides | % Seq Coverage | Num Spectra |
|-----------------------|-------------------|--------------|----------------|-------------|
| Total (Non-Redundant) | 1                 | 2            | 6.98           | 3.0         |

**Peptides:**

| Observed | Mr(expt)  | Mr(calc)  | Mass Error (ppm) | Charge | Score | Score Delta | Peptide                   | Group | Replicate |
|----------|-----------|-----------|------------------|--------|-------|-------------|---------------------------|-------|-----------|
| 948.2584 | 2841.7518 | 2842.1577 | 142.82           | 3      | 3.95  | 1.99        | MVFAHGVDKEGHVVIYSSYGEFQNK | LYT   | rep2      |
| 948.4161 | 2842.2249 | 2842.1577 | 23.66            | 3      | 2.55  | 0.32        | MVFAHGVDKEGHVVIYSSYGEFQNK | LYK   | rep1      |
| 552.7008 | 1655.0789 | 1654.777  | 182.49           | 3      | 2.24  | 0.47        | VEEEKPAVPAAEEEK           | LYT   | rep1      |

**Matching Genes:**

[NP\\_177360.1](#) (PATL1 (PATELLIN 1); transporter [Arabidopsis thaliana])

**Protein Group 257****Expression Quality:**

| Group                 | Group Probability | Num Peptides | % Seq Coverage | Num Spectra |
|-----------------------|-------------------|--------------|----------------|-------------|
| Total (Non-Redundant) | 1                 | 1            | 7.14           | 5.0         |

**Peptides:**

| Observed  | Mr(expt)  | Mr(calc)  | Mass Error (ppm) | Charge | Score | Score Delta | Peptide                                          | Group | Replicate |
|-----------|-----------|-----------|------------------|--------|-------|-------------|--------------------------------------------------|-------|-----------|
| 1145.1805 | 3432.5181 | 3433.8569 | 389.87           | 3      | 6.17  | 3.82        | KGEDLFVEHTLSLTEALCGFQFVLTHLDGR : +57.05000 (C18) | LYK   | rep3      |
| 1145.5131 | 3433.5157 | 3433.8569 | 99.37            | 3      | 3.17  | 1.49        | KGEDLFVEHTLSLTEALCGFQFVLTHLDGR : +57.05000 (C18) | LYT   | rep3      |

**Matching Genes:**

[NP\\_189997.1](#) (ATJ3 (Arabidopsis thaliana DnaJ homologue 3))

**Protein Group 258****Expression Quality:**

| Group                 | Group Probability | Num Peptides | % Seq Coverage | Num Spectra |
|-----------------------|-------------------|--------------|----------------|-------------|
| Total (Non-Redundant) | 1                 | 3            | 13.95          | 19.0        |

**Peptides:**

| Observed  | Mr(expt)  | Mr(calc)  | Mass Error (ppm) | Charge | Score | Score Delta | Peptide                                       | Group | Replicate |
|-----------|-----------|-----------|------------------|--------|-------|-------------|-----------------------------------------------|-------|-----------|
| 1305.45   | 2608.8843 | 2608.9162 | 12.24            | 2      | 1.96  | 0.43        | FSPGSQIYIPVPTWSNHHNIWK                        | LYT   | rep1      |
| 870.5988  | 2608.7728 | 2608.9162 | 54.99            | 3      | 1.57  | 0.55        | FSPGSQIYIPVPTWSNHHNIWK                        | LYK   | rep2      |
| 1061.2023 | 3180.5833 | 3181.4216 | 263.49           | 3      | 1.44  | 0.13        | NAPEGSFLLHACAHNPTGVDPTEEQWR : +57.05000 (C13) | LYK   | rep2      |
| 669.9562  | 1337.8968 | 1338.4287 | 397.43           | 2      | 2.78  | 1.24        | TYHYYHPETK                                    | LYK   | rep3      |
| 670.3858  | 1338.7559 | 1338.4287 | 244.46           | 2      | 2.32  | 0.78        | TYHYYHPETK                                    | LYT   | rep3      |

**Matching Genes:**

[NP\\_180654.1](#) (ASP1 (ASPARTATE AMINOTRANSFERASE 1) [Arabidopsis thaliana])

**Protein Group 259**

**Expression Quality:**

| Group                 | Group Probability | Num Peptides | % Seq Coverage | Num Spectra |
|-----------------------|-------------------|--------------|----------------|-------------|
| Total (Non-Redundant) | 1                 | 2            | 6.88           | 13.0        |

**Peptides:**

| Observed | Mr(expt)  | Mr(calc)  | Mass Error (ppm) | Charge | Score | Score Delta | Peptide                    | Group | Replicate |
|----------|-----------|-----------|------------------|--------|-------|-------------|----------------------------|-------|-----------|
| 411.1826 | 1230.5242 | 1230.4017 | 99.54            | 3      | 2.86  | 1.07        | LHFHDCFVR : +57.05000 (C6) | LYK   | rep2      |
| 411.1906 | 1230.5482 | 1230.4017 | 119.03           | 3      | 2.63  | 1.1         | LHFHDCFVR : +57.05000 (C6) | LYT   | rep1      |
| 549.3276 | 1644.9594 | 1642.8857 | 1262.23          | 3      | 3.29  | 1.73        | MGNLRPLTGTQGEIR            | LYK   | rep2      |
| 548.7224 | 1643.1438 | 1642.8857 | 157.06           | 3      | 2.83  | 1.24        | MGNLRPLTGTQGEIR            | LYT   | rep1      |

**Matching Genes:**

[NP\\_181372.1](#) (peroxidase 22 (PER22) (P22) (PRXEA) / basic peroxidase E [Arabidopsis thaliana])

---

**Protein Group 260****Expression Quality:**

| Group                 | Group Probability | Num Peptides | % Seq Coverage | Num Spectra |
|-----------------------|-------------------|--------------|----------------|-------------|
| Total (Non-Redundant) | 1                 | 2            | 10.08          | 8.0         |

**Peptides:**

| Observed  | Mr(expt)  | Mr(calc)  | Mass Error (ppm) | Charge | Score | Score Delta | Peptide                       | Group | Replicate |
|-----------|-----------|-----------|------------------|--------|-------|-------------|-------------------------------|-------|-----------|
| 1047.3456 | 3139.0133 | 3138.5408 | 150.55           | 3      | 3.72  | 1.75        | IPSSWVQYYTPLLAIQPPSGHDAADIVAK | LYK   | rep1      |
| 1047.1942 | 3138.5592 | 3138.5408 | 5.86             | 3      | 1.19  | 0.14        | IPSSWVQYYTPLLAIQPPSGHDAADIVAK | LYT   | rep3      |
| 784.0262  | 2349.0553 | 2348.7461 | 131.64           | 3      | 2.4   | 0.5         | KVPSFENVQIYNVISSILGLK         | LYK   | rep2      |
| 1175.3382 | 2348.6607 | 2348.7461 | 36.36            | 2      | 2.16  | 0.03        | KVPSFENVQIYNVISSILGLK         | LYT   | rep1      |

**Matching Genes:**

[NP\\_194697.1](#) (type I phosphodiesterase/nucleotide pyrophosphatase family protein [Arabidopsis thaliana])

---

**Protein Group 261****Expression Quality:**

| Group                 | Group Probability | Num Peptides | % Seq Coverage | Num Spectra |
|-----------------------|-------------------|--------------|----------------|-------------|
| Total (Non-Redundant) | 1                 | 2            | 39.39          | 7.0         |

**Peptides:**

| Observed | Mr(expt)  | Mr(calc)  | Mass Error (ppm) | Charge | Score | Score Delta | Peptide                        | Group | Replicate |
|----------|-----------|-----------|------------------|--------|-------|-------------|--------------------------------|-------|-----------|
| 800.8478 | 2399.5199 | 2399.8613 | 142.28           | 3      | 3.24  | 1.59        | LLGDVTIANGGVMPNIHNLLLPK        | LYT   | rep1      |
| 801.0792 | 2400.2142 | 2399.8613 | 147.04           | 3      | 1.29  | 0.11        | LLGDVTIANGGVMPNIHNLLLPK        | LYK   | rep1      |
| 958.7777 | 2873.3097 | 2872.2881 | 355.67           | 3      | 2.88  | 1.1         | VGAGAPVYLAADVLEYLAAEVLELAGNAAR | LYK   | rep3      |
| 958.25   | 2871.7265 | 2872.2881 | 195.51           | 3      | 1.26  | 0.28        | VGAGAPVYLAADVLEYLAAEVLELAGNAAR | LYT   | rep1      |

**Matching Genes:**

[NP\\_175517.1](#) (histone H2A, putative [Arabidopsis thaliana])

---

**Protein Group 262**

**Expression Quality:**

| Group                 | Group Probability | Num Peptides | % Seq Coverage | Num Spectra |
|-----------------------|-------------------|--------------|----------------|-------------|
| Total (Non-Redundant) | 1                 | 2            | 16.57          | 4.0         |

**Peptides:**

| Observed | Mr(expt)  | Mr(calc)  | Mass Error (ppm) | Charge | Score | Score Delta | Peptide                         | Group | Replicate |
|----------|-----------|-----------|------------------|--------|-------|-------------|---------------------------------|-------|-----------|
| 514.0861 | 1539.2347 | 1539.7208 | 315.7            | 3      | 3.07  | 0.14        | KDEHLIVACNAGGR : +57.05000 (C9) | LYT   | rep1      |
| 839.891  | 1677.7664 | 1677.9253 | 94.69            | 2      | 3.05  | 1.25        | SHVEEALNIPYMFK                  | LYT   | rep1      |

**Matching Genes:**

[NP\\_565497.3](#) (unknown protein [Arabidopsis thaliana])

---

**Protein Group 263**

**Expression Quality:**

| Group                 | Group Probability | Num Peptides | % Seq Coverage | Num Spectra |
|-----------------------|-------------------|--------------|----------------|-------------|
| Total (Non-Redundant) | 0.96              | 3            | 0.71           | 4.0         |

**Peptides:**

| Observed | Mr(expt)  | Mr(calc)  | Mass Error (ppm) | Charge | Score | Score Delta | Peptide                                               | Group | Replicate |
|----------|-----------|-----------|------------------|--------|-------|-------------|-------------------------------------------------------|-------|-----------|
| 724.3379 | 2169.9902 | 2169.4012 | 271.5            | 3      | 2.18  | 0.4         | AQFLPLLDPLMDGASDMR : +32.00000 (M12); +32.00000 (M18) | LYT   | rep3      |
| 808.4923 | 2422.4535 | 2422.7021 | 102.63           | 3      | 2.53  | 0.33        | ERAQFLPLLDPLMDGASDMR : +32.00000 (M20)                | LYT   | rep2      |
| 809.1095 | 2424.305  | 2422.7021 | 661.62           | 3      | 2.35  | 0.23        | ERAQFLPLLDPLMDGASDMR : +32.00000 (M20)                | LYK   | rep1      |
| 613.6029 | 1837.7852 | 1839.0615 | 693.98           | 3      | 1.4   | 0.41        | LLWAIDAHASELGVDTK                                     | LYT   | rep1      |



**Matching Genes:**

[NP\\_176883.3](#) (midasin-related [Arabidopsis thaliana])

---

**Protein Group 264****Expression Quality:**

| Group                 | Group Probability | Num Peptides | % Seq Coverage | Num Spectra |
|-----------------------|-------------------|--------------|----------------|-------------|
| Total (Non-Redundant) | 1                 | 3            | 10.94          | 3.0         |

**Peptides:**

| Observed | Mr(expt)  | Mr(calc)  | Mass Error (ppm) | Charge | Score | Score Delta | Peptide             | Group | Replicate |
|----------|-----------|-----------|------------------|--------|-------|-------------|---------------------|-------|-----------|
| 349.784  | 1046.3285 | 1048.1974 | 1782.93          | 3      | 1.87  | 0.23        | KLQQEQFK            | LYK   | rep3      |
| 773.5438 | 2317.608  | 2317.5627 | 19.53            | 3      | 1.77  | 0.31        | LQQEQFKPAEQVTLEPFER | LYT   | rep1      |
| 837.1767 | 1672.3377 | 1672.978  | 382.75           | 2      | 2.44  | 0.88        | VIVEPHRHAGVFIK      | LYT   | rep1      |

**Matching Genes:**

[NP\\_567724.1](#) (FIB2 (FIBRILLARIN 2) [Arabidopsis thaliana])

---

**Protein Group 265****Expression Quality:**

| Group                 | Group Probability | Num Peptides | % Seq Coverage | Num Spectra |
|-----------------------|-------------------|--------------|----------------|-------------|
| Total (Non-Redundant) | 1                 | 2            | 3.07           | 16.0        |

**Peptides:**

| Observed | Mr(expt)  | Mr(calc)  | Mass Error (ppm) | Charge | Score | Score Delta | Peptide               | Group | Replicate |
|----------|-----------|-----------|------------------|--------|-------|-------------|-----------------------|-------|-----------|
| 876.6863 | 2627.0354 | 2627.9382 | 343.56           | 3      | 3.62  | 2.1         | ESPYLTHPIFNMYHTEHELLR | LYK   | rep2      |
| 876.8605 | 2627.5579 | 2627.9382 | 144.71           | 3      | 2.68  | 1.27        | ESPYLTHPIFNMYHTEHELLR | LYT   | rep3      |
| 709.0828 | 1416.1499 | 1416.6322 | 340.42           | 2      | 2.46  | 0.87        | RLESHYPVLFK           | LYT   | rep2      |

|         |           |           |        |   |      |      |            |     |      |
|---------|-----------|-----------|--------|---|------|------|------------|-----|------|
| 709.105 | 1416.1944 | 1416.6322 | 309.06 | 2 | 2.15 | 0.68 | RLESHYPVLF | LYK | rep1 |
|---------|-----------|-----------|--------|---|------|------|------------|-----|------|

**Matching Genes:**

[NP\\_180178.1](#) (glycine dehydrogenase (decarboxylating), putative / glycine decarboxylase, putative / glycine cleavage system P-protein, putative [Arabidopsis thaliana])

**Protein Group 266**

**Expression Quality:**

| Group                 | Group Probability | Num Peptides | % Seq Coverage | Num Spectra |
|-----------------------|-------------------|--------------|----------------|-------------|
| Total (Non-Redundant) | 1                 | 2            | 11.82          | 8.0         |

**Peptides:**

| Observed | Mr(expt)  | Mr(calc)  | Mass Error (ppm) | Charge | Score | Score Delta | Peptide       | Group | Replicate |
|----------|-----------|-----------|------------------|--------|-------|-------------|---------------|-------|-----------|
| 387.2678 | 1158.7798 | 1158.4199 | 310.68           | 3      | 2.5   | 0.84        | LGMKPITGVSR   | LYT   | rep1      |
| 760.7918 | 1519.5679 | 1519.8321 | 173.86           | 2      | 3.57  | 1.48        | NILFVISKPDVFK | LYT   | rep3      |
| 760.9405 | 1519.8653 | 1519.8321 | 21.8             | 2      | 2.84  | 0.65        | NILFVISKPDVFK | LYK   | rep3      |

**Matching Genes:**

[NP\\_187845.1](#) (nascent polypeptide associated complex alpha chain protein, putative / alpha-NAC, putative [Arabidopsis thaliana])

**Protein Group 267**

**Expression Quality:**

| Group                 | Group Probability | Num Peptides | % Seq Coverage | Num Spectra |
|-----------------------|-------------------|--------------|----------------|-------------|
| Total (Non-Redundant) | 1                 | 1            | 17.2           | 8.0         |

**Peptides:**

| Observed  | Mr(expt)  | Mr(calc)  | Mass Error (ppm) | Charge | Score | Score Delta | Peptide                           | Group | Replicate |
|-----------|-----------|-----------|------------------|--------|-------|-------------|-----------------------------------|-------|-----------|
| 1235.1532 | 3702.4361 | 3704.1645 | 466.62           | 3      | 6.01  | 4.07        | TPNAVNPLVLGSFPLLTI DVWEHAYYLDFQNR | LYK   | rep3      |
| 1235.9542 | 3704.8392 | 3704.1645 | 182.13           | 3      | 3.52  | 1.81        | TPNAVNPLVLGSFPLLTI DVWEHAYYLDFQNR | LYT   | rep3      |

**Matching Genes:**

[NP\\_001031710.1](#) (FSD1 (FE SUPEROXIDE DISMUTASE 1); iron superoxide dismutase [Arabidopsis thaliana])

**Protein Group 268****Expression Quality:**

| Group                 | Group Probability | Num Peptides | % Seq Coverage | Num Spectra |
|-----------------------|-------------------|--------------|----------------|-------------|
| Total (Non-Redundant) | 1                 | 2            | 7.63           | 12.0        |

**Peptides:**

| Observed | Mr(expt)  | Mr(calc)  | Mass Error (ppm) | Charge | Score | Score Delta | Peptide                                                      | Group | Replicate |
|----------|-----------|-----------|------------------|--------|-------|-------------|--------------------------------------------------------------|-------|-----------|
| 962.3597 | 2884.0557 | 2885.1596 | 382.61           | 3      | 2.37  | 0.82        | CTGCELGGDSGVEPYTVAHNQLLAHAK : +57.05000 (C1); +57.05000 (C4) | LYT   | rep2      |
| 962.4561 | 2884.3447 | 2885.1596 | 282.46           | 3      | 1.49  | 0.07        | CTGCELGGDSGVEPYTVAHNQLLAHAK : +57.05000 (C1); +57.05000 (C4) | LYK   | rep1      |
| 748.8181 | 1495.6206 | 1496.7179 | 733.09           | 2      | 3.56  | 1.81        | IQNHCSHLSCLK : +57.05000 (C5); +57.05000 (C10)               | LYK   | rep2      |
| 749.3433 | 1496.6709 | 1496.7179 | 31.36            | 2      | 3.24  | 1.89        | IQNHCSHLSCLK : +57.05000 (C5); +57.05000 (C10)               | LYT   | rep2      |

**Matching Genes:**

[NP\\_175191.2](#) (glycosyl hydrolase family 1 protein [Arabidopsis thaliana])

**Protein Group 269****Expression Quality:**

| Group                 | Group Probability | Num Peptides | % Seq Coverage | Num Spectra |
|-----------------------|-------------------|--------------|----------------|-------------|
| Total (Non-Redundant) | 1                 | 3            | 9.8            | 5.0         |

**Peptides:**

| Observed | Mr(expt) | Mr(calc)  | Mass Error (ppm) | Charge | Score | Score Delta | Peptide               | Group | Replicate |
|----------|----------|-----------|------------------|--------|-------|-------------|-----------------------|-------|-----------|
| 801.6455 | 2401.913 | 2402.6775 | 318.16           | 3      | 2.64  | 0.86        | KVYYAGLPDHPGHHLHFSQAK | LYK   | rep3      |

|          |           |           |        |   |      |      |                                           |     |      |
|----------|-----------|-----------|--------|---|------|------|-------------------------------------------|-----|------|
| 842.1453 | 2523.4123 | 2522.7932 | 245.39 | 3 | 1.5  | 0.47 | SVDAMNIKEEASVSTLLVNLNDNK : +32.00000 (M5) | LYK | rep2 |
| 758.8932 | 2273.6561 | 2274.5044 | 372.96 | 3 | 1.78 | 0.55 | VYYAGLPDHPGHHLHFSQAK                      | LYT | rep3 |
| 759.1058 | 2274.294  | 2274.5044 | 92.48  | 3 | 1.72 | 0.31 | VYYAGLPDHPGHHLHFSQAK                      | LYK | rep3 |

**Matching Genes:**

[NP\\_850712.1](#) (CBL (CYSTATHIONINE BETA-LYASE) [Arabidopsis thaliana])

**Protein Group 270**

**Expression Quality:**

| Group                 | Group Probability | Num Peptides | % Seq Coverage | Num Spectra |
|-----------------------|-------------------|--------------|----------------|-------------|
| Total (Non-Redundant) | 1                 | 2            | 8.23           | 7.0         |

**Peptides:**

| Observed  | Mr(expt)  | Mr(calc)  | Mass Error (ppm) | Charge | Score | Score Delta | Peptide                                            | Group | Replicate |
|-----------|-----------|-----------|------------------|--------|-------|-------------|----------------------------------------------------|-------|-----------|
| 362.2026  | 1083.5843 | 1083.2051 | 350.06           | 3      | 2.41  | 0.34        | HFRPELER                                           | LYK   | rep1      |
| 362.2725  | 1083.7941 | 1083.2051 | 543.78           | 3      | 2.32  | 0.68        | HFRPELER                                           | LYT   | rep3      |
| 1128.9161 | 3383.7249 | 3384.9121 | 350.72           | 3      | 3.51  | 1.78        | LKPPFPANAGLYGCPTTVTNVETVAVSPTILR : +57.05000 (C14) | LYT   | rep1      |
| 1128.963  | 3383.8656 | 3384.9121 | 309.17           | 3      | 2.28  | 0.58        | LKPPFPANAGLYGCPTTVTNVETVAVSPTILR : +57.05000 (C14) | LYK   | rep2      |

**Matching Genes:**

[NP\\_196470.1](#) (NADH-ubiquinone oxidoreductase 51 kDa subunit, mitochondrial, putative [Arabidopsis thaliana])

**Protein Group 271**

**Expression Quality:**

| Group                 | Group Probability | Num Peptides | % Seq Coverage | Num Spectra |
|-----------------------|-------------------|--------------|----------------|-------------|
| Total (Non-Redundant) | 1                 | 1            | 23.53          | 8.0         |

**Peptides:**

| Observed  | Mr(expt)  | Mr(calc)  | Mass Error (ppm) | Charge | Score | Score Delta | Peptide                                            | Group | Replicate |
|-----------|-----------|-----------|------------------|--------|-------|-------------|----------------------------------------------------|-------|-----------|
| 1177.5587 | 3529.6527 | 3530.9726 | 373.81           | 3      | 5.88  | 3.73        | FQSHAVLALQEAAEAYLVGLFEDTNLCAIHAK : +57.05000 (C27) | LYT   | rep3      |
| 1177.4254 | 3529.2528 | 3530.9726 | 487.07           | 3      | 5.61  | 3.37        | FQSHAVLALQEAAEAYLVGLFEDTNLCAIHAK : +57.05000 (C27) | LYK   | rep3      |

**Matching Genes:**

[NP\\_001031816.1](#) (DNA binding [Arabidopsis thaliana])

**Protein Group 272**

**Expression Quality:**

| Group                 | Group Probability | Num Peptides | % Seq Coverage | Num Spectra |
|-----------------------|-------------------|--------------|----------------|-------------|
| Total (Non-Redundant) | 1                 | 2            | 6.42           | 7.0         |

**Peptides:**

| Observed  | Mr(expt)  | Mr(calc)  | Mass Error (ppm) | Charge | Score | Score Delta | Peptide                             | Group | Replicate |
|-----------|-----------|-----------|------------------|--------|-------|-------------|-------------------------------------|-------|-----------|
| 736.9536  | 1471.8916 | 1472.5663 | 458.14           | 2      | 2.64  | 0.8         | DAFVVYQGHHGDK                       | LYT   | rep1      |
| 737.3644  | 1472.7132 | 1472.5663 | 99.76            | 2      | 2.29  | 0.38        | DAFVVYQGHHGDK                       | LYK   | rep2      |
| 1217.5831 | 3649.7259 | 3649.2121 | 140.79           | 3      | 3.21  | 1.17        | DALAVVGDIIHQVKPDEIVGVAGQLSDAESMMVLK | LYK   | rep3      |

**Matching Genes:**

[NP\\_568550.1](#) (EMB1467 (EMBRYO DEFECTIVE 1467); NADH dehydrogenase [Arabidopsis thaliana])

**Protein Group 273**

**Expression Quality:**

| Group                 | Group Probability | Num Peptides | % Seq Coverage | Num Spectra |
|-----------------------|-------------------|--------------|----------------|-------------|
| Total (Non-Redundant) | 1                 | 3            | 10.16          | 7.0         |

**Peptides:**

| Observed | Mr(expt)  | Mr(calc)  | Mass Error (ppm) | Charge | Score | Score Delta | Peptide         | Group | Replicate |
|----------|-----------|-----------|------------------|--------|-------|-------------|-----------------|-------|-----------|
| 478.2046 | 954.3936  | 954.0858  | 322.6            | 2      | 2.01  | 0.27        | FFVGGNWK        | LYT   | rep1      |
| 541.0664 | 1620.1757 | 1618.7992 | 850.36           | 3      | 1.71  | 0.61        | VASPQQAQEVHVAVR | LYK   | rep1      |
| 540.6742 | 1618.9991 | 1618.7992 | 123.5            | 3      | 1.65  | 0.54        | VASPQQAQEVHVAVR | LYT   | rep3      |
| 549.2117 | 1096.4077 | 1096.2438 | 149.59           | 2      | 2.12  | 0.64        | WVILGHSER       | LYT   | rep2      |

**Matching Genes:**

[NP\\_179713.1](#) (TIM (TRIOSEPHOSPHATE ISOMERASE); triose-phosphate isomerase [Arabidopsis thaliana])

**Protein Group 274**

**Expression Quality:**

| Group                 | Group Probability | Num Peptides | % Seq Coverage | Num Spectra |
|-----------------------|-------------------|--------------|----------------|-------------|
| Total (Non-Redundant) | 1                 | 2            | 16.04          | 12.0        |

**Peptides:**

| Observed | Mr(expt)  | Mr(calc)  | Mass Error (ppm) | Charge | Score | Score Delta | Peptide                             | Group | Replicate |
|----------|-----------|-----------|------------------|--------|-------|-------------|-------------------------------------|-------|-----------|
| 1005.696 | 2009.3763 | 2010.1366 | 378.25           | 2      | 3.98  | 1.62        | ATYHFFYNPAQNNWDLR                   | LYK   | rep2      |
| 1005.825 | 2009.6343 | 2010.1366 | 249.87           | 2      | 3.7   | 1.2         | ATYHFFYNPAQNNWDLR                   | LYT   | rep3      |
| 716.6957 | 2147.0636 | 2147.3334 | 125.65           | 3      | 1.85  | 0.59        | AVSAYCSTWDADKPYAWR : +57.05000 (C6) | LYT   | rep3      |
| 716.6066 | 2146.7962 | 2147.3334 | 250.15           | 3      | 1.25  | 0.14        | AVSAYCSTWDADKPYAWR : +57.05000 (C6) | LYK   | rep2      |

**Matching Genes:**

[NP\\_187123.1](#) (PR4 (PATHOGENESIS-RELATED 4) [Arabidopsis thaliana])

**Protein Group 275**

**Expression Quality:**

| Group | Group Probability | Num Peptides | % Seq Coverage | Num Spectra |
|-------|-------------------|--------------|----------------|-------------|
|-------|-------------------|--------------|----------------|-------------|

|                       |      |   |       |     |
|-----------------------|------|---|-------|-----|
| Total (Non-Redundant) | 0.96 | 3 | 14.02 | 5.0 |
|-----------------------|------|---|-------|-----|

**Peptides:**

| Observed | Mr(expt)  | Mr(calc)  | Mass Error (ppm) | Charge | Score | Score Delta | Peptide                                                              | Group | Replicate |
|----------|-----------|-----------|------------------|--------|-------|-------------|----------------------------------------------------------------------|-------|-----------|
| 689.377  | 2065.1074 | 2066.3871 | 619.28           | 3      | 1.97  | 0.39        | CLADLCGALHCDFVLSSK : +57.05000 (C1); +57.05000 (C6); +57.05000 (C11) | LYK   | rep3      |
| 651.0643 | 1950.1695 | 1952.2871 | 1084.65          | 3      | 1.59  | 0.42        | CLADLCGALHCDFVLSSK : +57.05000 (C1)                                  | LYK   | rep1      |
| 771.1488 | 2310.4229 | 2310.5105 | 37.89            | 3      | 2.22  | 0.34        | LVNEEVEVSNAP EIHCSRER                                                | LYK   | rep3      |
| 771.1617 | 2310.4618 | 2310.5105 | 21.09            | 3      | 1.97  | 0.16        | LVNEEVEVSNAP EIHCSRER                                                | LYT   | rep2      |

**Matching Genes:**

[NP\\_568969.1](#) (zinc finger (C2H2 type) family protein [Arabidopsis thaliana])

**Protein Group 276**

**Expression Quality:**

| Group                 | Group Probability | Num Peptides | % Seq Coverage | Num Spectra |
|-----------------------|-------------------|--------------|----------------|-------------|
| Total (Non-Redundant) | 1                 | 2            | 7.64           | 7.0         |

**Peptides:**

| Observed | Mr(expt)  | Mr(calc)  | Mass Error (ppm) | Charge | Score | Score Delta | Peptide            | Group | Replicate |
|----------|-----------|-----------|------------------|--------|-------|-------------|--------------------|-------|-----------|
| 517.9293 | 1550.7645 | 1550.7234 | 26.51            | 3      | 3.55  | 1.17        | HFHSLGAGVIEEVR     | LYT   | rep3      |
| 517.9103 | 1550.7074 | 1550.7234 | 10.33            | 3      | 2.48  | 0.68        | HFHSLGAGVIEEVR     | LYK   | rep2      |
| 684.6554 | 2050.9427 | 2050.4238 | 253.07           | 3      | 2.21  | 0.67        | MAGMNPMMHHPQGQHAFK | LYT   | rep3      |

**Matching Genes:**

[NP\\_564018.1](#) (UBP1B (OLIGOURIDYLATE BINDING PROTEIN 1B); mRNA 3'-UTR binding [Arabidopsis thaliana])

**Protein Group 277**

**Expression Quality:**

| Group                 | Group Probability | Num Peptides | % Seq Coverage | Num Spectra |
|-----------------------|-------------------|--------------|----------------|-------------|
| Total (Non-Redundant) | 1                 | 2            | 9.62           | 4.0         |

**Peptides:**

| Observed | Mr(expt)  | Mr(calc)  | Mass Error (ppm) | Charge | Score | Score Delta | Peptide         | Group | Replicate |
|----------|-----------|-----------|------------------|--------|-------|-------------|-----------------|-------|-----------|
| 441.9328 | 1322.7749 | 1324.4636 | 1275             | 3      | 1.98  | 0.54        | ATDNTLSLCSTAK   | LYK   | rep3      |
| 566.6642 | 1696.9691 | 1695.8406 | 665.46           | 3      | 3.75  | 1.75        | KGDGTTHVFLHDVNR | LYT   | rep3      |
| 566.6134 | 1696.8167 | 1695.8406 | 575.63           | 3      | 2.94  | 1.06        | KGDGTTHVFLHDVNR | LYK   | rep2      |

**Matching Genes:**

[NP\\_176901.1](#) (unknown protein [Arabidopsis thaliana])

**Protein Group 278****Expression Quality:**

| Group                 | Group Probability | Num Peptides | % Seq Coverage | Num Spectra |
|-----------------------|-------------------|--------------|----------------|-------------|
| Total (Non-Redundant) | 1                 | 2            | 15.29          | 4.0         |

**Peptides:**

| Observed | Mr(expt)  | Mr(calc)  | Mass Error (ppm) | Charge | Score | Score Delta | Peptide                       | Group | Replicate |
|----------|-----------|-----------|------------------|--------|-------|-------------|-------------------------------|-------|-----------|
| 756.6346 | 1511.2535 | 1511.6472 | 260.48           | 2      | 3.23  | 1.63        | AVSLQGQHGPFSR                 | LYT   | rep1      |
| 795.3275 | 1588.6394 | 1588.7519 | 70.79            | 2      | 2.48  | 0.62        | CQKEFQQSQHLR : +57.05000 (C1) | LYT   | rep1      |

**Matching Genes:**

[NP\\_194445.1](#) (2S seed storage protein 2 / 2S albumin storage protein / NWMU2-2S albumin 2 [Arabidopsis thaliana])

**Protein Group 279**



**Expression Quality:**

| Group                 | Group Probability | Num Peptides | % Seq Coverage | Num Spectra |
|-----------------------|-------------------|--------------|----------------|-------------|
| Total (Non-Redundant) | 1                 | 1            | 18.67          | 5.0         |

**Peptides:**

| Observed  | Mr(expt)  | Mr(calc)  | Mass Error (ppm) | Charge | Score | Score Delta | Peptide                      | Group | Replicate |
|-----------|-----------|-----------|------------------|--------|-------|-------------|------------------------------|-------|-----------|
| 1042.6127 | 3124.8145 | 3122.4153 | 768.4            | 3      | 5.71  | 3.85        | EGEQVFGVVHIFASFNDTFIHVTDLSGR | LYK   | rep3      |
| 1042.0841 | 3123.2288 | 3122.4153 | 260.56           | 3      | 2.47  | 0.99        | EGEQVFGVVHIFASFNDTFIHVTDLSGR | LYT   | rep3      |

**Matching Genes:**

[NP\\_181158.1](#) (40S ribosomal protein S14 (RPS14A) [Arabidopsis thaliana])

**Protein Group 280****Expression Quality:**

| Group                 | Group Probability | Num Peptides | % Seq Coverage | Num Spectra |
|-----------------------|-------------------|--------------|----------------|-------------|
| Total (Non-Redundant) | 1                 | 3            | 9.83           | 8.0         |

**Peptides:**

| Observed | Mr(expt)  | Mr(calc)  | Mass Error (ppm) | Charge | Score | Score Delta | Peptide                 | Group | Replicate |
|----------|-----------|-----------|------------------|--------|-------|-------------|-------------------------|-------|-----------|
| 483.5424 | 1447.6036 | 1447.7692 | 114.35           | 3      | 1.5   | 0.19        | FLKPSVAGFLLQK           | LYK   | rep1      |
| 483.7423 | 1448.2035 | 1447.7692 | 299.98           | 3      | 1.22  | 0.36        | FLKPSVAGFLLQK           | LYT   | rep3      |
| 791.3812 | 2371.1202 | 2370.707  | 174.29           | 3      | 1.89  | 0.28        | GVSLLLPTDVVIADKFAPDANSK | LYK   | rep1      |
| 611.0755 | 1220.1353 | 1220.4695 | 273.81           | 2      | 2.3   | 0.77        | VILSTHLGRPK             | LYK   | rep2      |
| 611.0091 | 1220.0025 | 1220.4695 | 382.63           | 2      | 1.9   | 0.57        | VILSTHLGRPK             | LYT   | rep2      |

**Matching Genes:**

[NP\\_176015.1](#) (phosphoglycerate kinase, putative [Arabidopsis thaliana])

---

**Protein Group 281****Expression Quality:**

| Group                 | Group Probability | Num Peptides | % Seq Coverage | Num Spectra |
|-----------------------|-------------------|--------------|----------------|-------------|
| Total (Non-Redundant) | 1                 | 2            | 26.15          | 12.0        |

**Peptides:**

| Observed  | Mr(expt)  | Mr(calc)  | Mass Error (ppm) | Charge | Score | Score Delta | Peptide                                   | Group | Replicate |
|-----------|-----------|-----------|------------------|--------|-------|-------------|-------------------------------------------|-------|-----------|
| 1439.0555 | 4314.1431 | 4315.6841 | 357.05           | 3      | 2.24  | 0.56        | LHSHDVPYGSQSGSQSVTGFPVVDNSNSYWIVKPVPGTTEK | LYK   | rep3      |
| 940.5288  | 1879.042  | 1879.0459 | 2.05             | 2      | 3.43  | 1.84        | LQHIDTSGYLHSHDKK                          | LYK   | rep2      |
| 940.5677  | 1879.1197 | 1879.0459 | 39.26            | 2      | 3.36  | 1.56        | LQHIDTSGYLHSHDKK                          | LYT   | rep3      |

**Matching Genes:**

[NP\\_565585.1](#) (MIR domain-containing protein [Arabidopsis thaliana])

---

**Protein Group 282****Expression Quality:**

| Group                 | Group Probability | Num Peptides | % Seq Coverage | Num Spectra |
|-----------------------|-------------------|--------------|----------------|-------------|
| Total (Non-Redundant) | 1                 | 2            | 15.31          | 9.0         |

**Peptides:**

| Observed | Mr(expt)  | Mr(calc)  | Mass Error (ppm) | Charge | Score | Score Delta | Peptide                                  | Group | Replicate |
|----------|-----------|-----------|------------------|--------|-------|-------------|------------------------------------------|-------|-----------|
| 824.3174 | 2469.9287 | 2470.6392 | 287.59           | 3      | 1.31  | 0.48        | ATPGHTAGCVTYVTGEGADQPQR : +57.05000 (C9) | LYT   | rep1      |
| 764.63   | 2290.8665 | 2291.6382 | 336.72           | 3      | 4.35  | 2.34        | LIYAMNTHVHADHVTGTGLLK                    | LYK   | rep2      |
| 764.5751 | 2290.7017 | 2291.6382 | 408.63           | 3      | 3.57  | 2           | LIYAMNTHVHADHVTGTGLLK                    | LYT   | rep3      |

**Matching Genes:**

[NP\\_564636.2](#) (ETHE1/GLX2-3 (GLYOXALASE 2-3); hydroxyacylglutathione hydrolase [Arabidopsis thaliana])

---

**Protein Group 283****Expression Quality:**

| Group                 | Group Probability | Num Peptides | % Seq Coverage | Num Spectra |
|-----------------------|-------------------|--------------|----------------|-------------|
| Total (Non-Redundant) | 1                 | 2            | 8.11           | 11.0        |

**Peptides:**

| Observed  | Mr(expt)  | Mr(calc)  | Mass Error (ppm) | Charge | Score | Score Delta | Peptide                  | Group | Replicate |
|-----------|-----------|-----------|------------------|--------|-------|-------------|--------------------------|-------|-----------|
| 830.4761  | 2488.4047 | 2487.8987 | 203.42           | 3      | 3.69  | 1.83        | EVIELPIKHPELFESESLGIAQPK | YT    | rep3      |
| 1244.4417 | 2486.8677 | 2487.8987 | 414.39           | 2      | 2.23  | 0.6         | EVIELPIKHPELFESESLGIAQPK | LYK   | rep2      |
| 814.5302  | 1627.0447 | 1627.8077 | 468.74           | 2      | 1.96  | 0.59        | QYYLQHIHELQR             | LYT   | rep1      |
| 543.5741  | 1627.6988 | 1627.8077 | 66.91            | 3      | 1.43  | 0.12        | QYYLQHIHELQR             | LYK   | rep1      |

**Matching Genes:**

[NP\\_568389.1](#) (ATSUG1; ATPase [Arabidopsis thaliana])

**Protein Group 284****Expression Quality:**

| Group                 | Group Probability | Num Peptides | % Seq Coverage | Num Spectra |
|-----------------------|-------------------|--------------|----------------|-------------|
| Total (Non-Redundant) | 0.98              | 3            | 23.38          | 3.0         |

**Peptides:**

| Observed  | Mr(expt)  | Mr(calc)  | Mass Error (ppm) | Charge | Score | Score Delta | Peptide                                                        | Group | Replicate |
|-----------|-----------|-----------|------------------|--------|-------|-------------|----------------------------------------------------------------|-------|-----------|
| 1311.2103 | 3930.6075 | 3931.4197 | 206.58           | 3      | 2.01  | 0.32        | DMGDSISGKGMIQGVSAVGAFYQLLSQSSLSILPSEEK                         | LYT   | rep1      |
| 990.8812  | 2969.6202 | 2971.3628 | 586.48           | 3      | 2.04  | 0.43        | FLRQPHFIVWDNSDLVTHEVMGGLK : +32.00000 (M21)                    | LYK   | rep3      |
| 1626.629  | 4876.8636 | 4878.4933 | 334.06           | 3      | 1.55  | 0.52        | NVYAIGAGMVAALTNESATSKSVYFAHCTSEMIFITHLLAEEPEK : +32.00000 (M9) | LYT   | rep2      |

**Matching Genes:**

[NP\\_001031525.1](#) (GPDHC1; glycerol-3-phosphate dehydrogenase (NAD+) [Arabidopsis thaliana])

---

**Protein Group 285**

**Expression Quality:**

| Group                 | Group Probability | Num Peptides | % Seq Coverage | Num Spectra |
|-----------------------|-------------------|--------------|----------------|-------------|
| Total (Non-Redundant) | 1                 | 2            | 11.3           | 6.0         |

**Peptides:**

| Observed  | Mr(expt)  | Mr(calc)  | Mass Error (ppm) | Charge | Score | Score Delta | Peptide                                           | Group | Replicate |
|-----------|-----------|-----------|------------------|--------|-------|-------------|---------------------------------------------------|-------|-----------|
| 481.132   | 960.2483  | 960.0455  | 211.31           | 2      | 1.48  | 0.32        | DIVDAHVK                                          | LYK   | rep1      |
| 480.881   | 959.7463  | 960.0455  | 311.66           | 2      | 1.44  | 0.19        | DIVDAHVK                                          | LYT   | rep3      |
| 1139.8427 | 3416.5045 | 3417.7712 | 370.63           | 3      | 4.11  | 2.22        | ITEISGVIVSFDPKPVPGDWNGAGAHCNYSK : +57.05000 (C27) | LYT   | rep3      |

**Matching Genes:**

[NP\\_188409.1](#) (ATGSKB6 (Arabidopsis thaliana glutamine synthase clone KB6); glutamate-ammonia ligase)

---

**Protein Group 286**

**Expression Quality:**

| Group                 | Group Probability | Num Peptides | % Seq Coverage | Num Spectra |
|-----------------------|-------------------|--------------|----------------|-------------|
| Total (Non-Redundant) | 1                 | 3            | 15.29          | 5.0         |

**Peptides:**

| Observed | Mr(expt)  | Mr(calc)  | Mass Error (ppm) | Charge | Score | Score Delta | Peptide       | Group | Replicate |
|----------|-----------|-----------|------------------|--------|-------|-------------|---------------|-------|-----------|
| 705.8667 | 1409.7178 | 1409.5898 | 90.79            | 2      | 1.68  | 0.29        | DIESALLDHLGVK | LYT   | rep1      |
| 692.1209 | 1382.2261 | 1382.6124 | 279.4            | 2      | 1.56  | 0.47        | TLLGEPKPPQFR  | LYT   | rep1      |
| 692.4445 | 1382.8733 | 1382.6124 | 188.71           | 2      | 1.36  | 0.01        | TLLGEPKPPQFR  | LYK   | rep2      |

|          |          |           |        |   |      |      |                                                  |     |      |
|----------|----------|-----------|--------|---|------|------|--------------------------------------------------|-----|------|
| 861.1658 | 1720.316 | 1721.0819 | 445.02 | 2 | 2.34 | 0.84 | YHLLVCGTTPCMIR : +57.05000 (C6); +57.05000 (C11) | LYT | rep1 |
|----------|----------|-----------|--------|---|------|------|--------------------------------------------------|-----|------|

**Matching Genes:**

[NP\\_567244.1](#) (NADH-ubiquinone oxidoreductase 24 kDa subunit, putative [Arabidopsis thaliana])

**Protein Group 287**

**Expression Quality:**

| Group                 | Group Probability | Num Peptides | % Seq Coverage | Num Spectra |
|-----------------------|-------------------|--------------|----------------|-------------|
| Total (Non-Redundant) | 1                 | 3            | 4.93           | 3.0         |

**Peptides:**

| Observed  | Mr(expt)  | Mr(calc) | Mass Error (ppm) | Charge | Score | Score Delta | Peptide                                              | Group | Replicate |
|-----------|-----------|----------|------------------|--------|-------|-------------|------------------------------------------------------|-------|-----------|
| 1220.6049 | 3658.7911 | 3660.045 | 342.59           | 3      | 1.99  | 0.51        | LVGRLSQEELMDQLSSFLPAVFEEAFGSQSADVR : +32.00000 (M11) | LYT   | rep3      |
| 572.0276  | 1713.0593 | 1714.922 | 1086.17          | 3      | 2.14  | 0.67        | NGGLGLSDIITQIQASK                                    | LYK   | rep3      |
| 807.8771  | 2420.6077 | 2419.72  | 366.87           | 3      | 1.45  | 0.29        | SVDLYEDLIRCCVADAMSEVR : +32.00000 (M17)              | LYK   | rep3      |

**Matching Genes:**

[NP\\_849997.2](#) (CLIP-associating protein (CLASP) -related [Arabidopsis thaliana])

**Protein Group 288**

**Expression Quality:**

| Group                 | Group Probability | Num Peptides | % Seq Coverage | Num Spectra |
|-----------------------|-------------------|--------------|----------------|-------------|
| Total (Non-Redundant) | 1                 | 2            | 16.39          | 6.0         |

**Peptides:**

| Observed  | Mr(expt)  | Mr(calc)  | Mass Error (ppm) | Charge | Score | Score Delta | Peptide           | Group | Replicate |
|-----------|-----------|-----------|------------------|--------|-------|-------------|-------------------|-------|-----------|
| 1045.8128 | 2089.6099 | 2090.2834 | 322.22           | 2      | 2.72  | 1.35        | NLEAWGGLMGPGYNYER | LYT   | rep2      |

|          |           |           |        |   |      |      |              |     |      |
|----------|-----------|-----------|--------|---|------|------|--------------|-----|------|
| 731.6193 | 1461.2229 | 1461.6233 | 273.9  | 2 | 2.83 | 1.06 | VYDKYGDYIGIR | LYT | rep2 |
| 488.6037 | 1462.7876 | 1461.6233 | 796.61 | 3 | 2.5  | 0.49 | VYDKYGDYIGIR | LYK | rep1 |

**Matching Genes:**

[NP\\_565527.1](#) (lipid-associated family protein [Arabidopsis thaliana])

**Protein Group 289**

**Expression Quality:**

| Group                 | Group Probability | Num Peptides | % Seq Coverage | Num Spectra |
|-----------------------|-------------------|--------------|----------------|-------------|
| Total (Non-Redundant) | 1                 | 1            | 3.23           | 5.0         |

**Peptides:**

| Observed  | Mr(expt)  | Mr(calc)  | Mass Error (ppm) | Charge | Score | Score Delta | Peptide                      | Group | Replicate |
|-----------|-----------|-----------|------------------|--------|-------|-------------|------------------------------|-------|-----------|
| 1069.704  | 3206.0885 | 3206.6484 | 174.63           | 3      | 5.55  | 3.39        | WGSNAFHNMLVVPPGSGIVHQNLEYLAR | LYK   | rep1      |
| 1069.9293 | 3206.7645 | 3206.6484 | 36.19            | 3      | 4.39  | 1.77        | WGSNAFHNMLVVPPGSGIVHQNLEYLAR | LYT   | rep3      |

**Matching Genes:**

[NP\\_195308.1](#) (aconitate hydratase, cytoplasmic / citrate hydro-lyase / aconitase (ACO) [Arabidopsis thaliana])

**Protein Group 290**

**Expression Quality:**

| Group                 | Group Probability | Num Peptides | % Seq Coverage | Num Spectra |
|-----------------------|-------------------|--------------|----------------|-------------|
| Total (Non-Redundant) | 1                 | 2            | 8.11           | 3.0         |

**Peptides:**

| Observed | Mr(expt)  | Mr(calc)  | Mass Error (ppm) | Charge | Score | Score Delta | Peptide                            | Group | Replicate |
|----------|-----------|-----------|------------------|--------|-------|-------------|------------------------------------|-------|-----------|
| 647.3627 | 1939.0645 | 1939.2947 | 118.71           | 3      | 2.45  | 1.04        | GQIHVEHMCSNALAMIK : +57.05000 (C9) | LYT   | rep1      |

|           |          |           |       |   |      |     |                                                  |     |      |
|-----------|----------|-----------|-------|---|------|-----|--------------------------------------------------|-----|------|
| 1227.6268 | 3679.857 | 3680.0272 | 46.23 | 3 | 3.06 | 1.5 | TALHDCLETIDETLDELHETVEDLHLYPTKK : +57.05000 (C6) | LYT | rep1 |
|-----------|----------|-----------|-------|---|------|-----|--------------------------------------------------|-----|------|

**Matching Genes:**

[NP\\_188048.1](#) (ATPME3 (Arabidopsis thaliana pectin methylesterase 3))

**Protein Group 291**

**Expression Quality:**

| Group                 | Group Probability | Num Peptides | % Seq Coverage | Num Spectra |
|-----------------------|-------------------|--------------|----------------|-------------|
| Total (Non-Redundant) | 1                 | 3            | 14.21          | 3.0         |

**Peptides:**

| Observed | Mr(expt)  | Mr(calc)  | Mass Error (ppm) | Charge | Score | Score Delta | Peptide        | Group | Replicate |
|----------|-----------|-----------|------------------|--------|-------|-------------|----------------|-------|-----------|
| 559.5935 | 1117.1714 | 1117.2865 | 102.99           | 2      | 1.67  | 0.49        | FMQLTNAHR      | LYK   | rep2      |
| 759.0315 | 1516.0474 | 1516.7303 | 450.27           | 2      | 2.5   | 1.21        | FMQLTNAHRGDVK  | LYT   | rep1      |
| 714.2483 | 1426.481  | 1426.5342 | 37.28            | 2      | 1.34  | 0.35        | TYATASAQTTANVK | LYT   | rep2      |

**Matching Genes:**

[NP\\_001031875.1](#) (ATP synthase delta chain, mitochondrial, putative / H(+)-transporting two-sector ATPase, delta (OSCP) subunit, putative [Arabidopsis thaliana])

**Protein Group 292**

**Expression Quality:**

| Group                 | Group Probability | Num Peptides | % Seq Coverage | Num Spectra |
|-----------------------|-------------------|--------------|----------------|-------------|
| Total (Non-Redundant) | 1                 | 2            | 10.14          | 4.0         |

**Peptides:**

| Observed | Mr(expt)  | Mr(calc)  | Mass Error (ppm) | Charge | Score | Score Delta | Peptide              | Group | Replicate |
|----------|-----------|-----------|------------------|--------|-------|-------------|----------------------|-------|-----------|
| 701.3434 | 2101.0067 | 2101.3257 | 151.81           | 3      | 2.93  | 1.35        | GHYTEGAEIIDSVLDDVVRK | LYK   | rep1      |
| 701.4745 | 2101.4    | 2101.3257 | 35.37            | 3      | 1.15  | 0.08        | GHYTEGAEIIDSVLDDVVRK | LYT   | rep1      |

|          |           |           |       |   |      |      |                            |     |      |
|----------|-----------|-----------|-------|---|------|------|----------------------------|-----|------|
| 934.0017 | 2798.9817 | 2799.0312 | 17.72 | 3 | 2.54 | 0.85 | SGPFGQIFRPDNFVFGQSGAGNNWAK | LYT | rep3 |
|----------|-----------|-----------|-------|---|------|------|----------------------------|-----|------|

**Matching Genes:**

[NP\\_193821.1](#) (TUB9 (tubulin beta-9 chain); structural molecule [Arabidopsis thaliana])

**Protein Group 293**

**Expression Quality:**

| Group                 | Group Probability | Num Peptides | % Seq Coverage | Num Spectra |
|-----------------------|-------------------|--------------|----------------|-------------|
| Total (Non-Redundant) | 1                 | 1            | 7.16           | 6.0         |

**Peptides:**

| Observed  | Mr(expt)  | Mr(calc)  | Mass Error (ppm) | Charge | Score | Score Delta | Peptide                           | Group | Replicate |
|-----------|-----------|-----------|------------------|--------|-------|-------------|-----------------------------------|-------|-----------|
| 1234.8187 | 3701.4327 | 3702.3249 | 240.99           | 3      | 5.46  | 3.25        | HGLIPVFPTMTFPNHYSIATGLYPAYHGIIMNK | LYK   | rep3      |
| 1235.2714 | 3702.7906 | 3702.3249 | 125.78           | 3      | 3.72  | 1.94        | HGLIPVFPTMTFPNHYSIATGLYPAYHGIIMNK | LYT   | rep2      |

**Matching Genes:**

[NP\\_194699.1](#) (type I phosphodiesterase/nucleotide pyrophosphatase family protein [Arabidopsis thaliana])

**Protein Group 294**

**Expression Quality:**

| Group                 | Group Probability | Num Peptides | % Seq Coverage | Num Spectra |
|-----------------------|-------------------|--------------|----------------|-------------|
| Total (Non-Redundant) | 1                 | 2            | 7.8            | 9.0         |

**Peptides:**

| Observed | Mr(expt)  | Mr(calc)  | Mass Error (ppm) | Charge | Score | Score Delta | Peptide              | Group | Replicate |
|----------|-----------|-----------|------------------|--------|-------|-------------|----------------------|-------|-----------|
| 752.9806 | 2255.9183 | 2256.4827 | 250.11           | 3      | 2.44  | 0.79        | GFTQTFEINHLNGEHVVSVK | LYK   | rep2      |
| 752.8191 | 2255.4338 | 2256.4827 | 464.82           | 3      | 1.66  | 0.3         | GFTQTFEINHLNGEHVVSVK | LYT   | rep3      |
| 569.3887 | 1705.1425 | 1705.0135 | 75.66            | 3      | 2.98  | 1.15        | KVYVTFSPVSISHIK      | LYT   | rep1      |



|          |           |           |        |   |     |      |                 |     |      |
|----------|-----------|-----------|--------|---|-----|------|-----------------|-----|------|
| 569.5001 | 1705.4769 | 1705.0135 | 271.76 | 3 | 2.6 | 0.97 | KVYVTFSPVSISHIK | LYK | rep1 |
|----------|-----------|-----------|--------|---|-----|------|-----------------|-----|------|

**Matching Genes:**

[NP\\_180168.1](#) (jacalin lectin family protein [Arabidopsis thaliana])

**Protein Group 295**

**Expression Quality:**

| Group                 | Group Probability | Num Peptides | % Seq Coverage | Num Spectra |
|-----------------------|-------------------|--------------|----------------|-------------|
| Total (Non-Redundant) | 1                 | 2            | 15.62          | 9.0         |

**Peptides:**

| Observed | Mr(expt)  | Mr(calc)  | Mass Error (ppm) | Charge | Score | Score Delta | Peptide            | Group | Replicate |
|----------|-----------|-----------|------------------|--------|-------|-------------|--------------------|-------|-----------|
| 666.4397 | 1996.2956 | 1996.2284 | 33.68            | 3      | 1.92  | 0.46        | SSVLMDVKPWDEETDMK  | LYT   | rep3      |
| 931.1346 | 1860.2535 | 1861.1103 | 460.42           | 2      | 3.49  | 1.67        | VYAAVPVKPSDAFPNASK | LYK   | rep3      |
| 931.3763 | 1860.7369 | 1861.1103 | 200.68           | 2      | 2.5   | 1.22        | VYAAVPVKPSDAFPNASK | LYT   | rep1      |

**Matching Genes:**

[NP\\_568375.2](#) (elongation factor 1B alpha-subunit 2 (eEF1Balpha2) [Arabidopsis thaliana])

**Protein Group 296**

**Expression Quality:**

| Group                 | Group Probability | Num Peptides | % Seq Coverage | Num Spectra |
|-----------------------|-------------------|--------------|----------------|-------------|
| Total (Non-Redundant) | 0.95              | 3            | 12.43          | 7.0         |

**Peptides:**

| Observed | Mr(expt)  | Mr(calc)  | Mass Error (ppm) | Charge | Score | Score Delta | Peptide                  | Group | Replicate |
|----------|-----------|-----------|------------------|--------|-------|-------------|--------------------------|-------|-----------|
| 947.1343 | 2838.3794 | 2838.2104 | 59.52            | 3      | 1.69  | 0.45        | DSLRFMDLANDNLPAPFFTLNQLK | LYK   | rep1      |
| 517.5482 | 1033.0808 | 1032.223  | 831.06           | 2      | 1.17  | 0.35        | LNCRVVNSK                | LYT   | rep2      |

|          |           |           |        |   |      |      |                            |     |      |
|----------|-----------|-----------|--------|---|------|------|----------------------------|-----|------|
| 607.0564 | 1212.0972 | 1211.3754 | 595.87 | 2 | 2.52 | 1.01 | NQCQFIMDR : +57.05000 (C3) | LYT | rep2 |
| 606.3299 | 1210.6441 | 1211.3754 | 603.7  | 2 | 1.6  | 0.58 | NQCQFIMDR : +57.05000 (C3) | LYK | rep2 |

**Matching Genes:**

[NP\\_192617.1](#) (peroxidase, putative [Arabidopsis thaliana])

**Protein Group 297**

**Expression Quality:**

| Group                 | Group Probability | Num Peptides | % Seq Coverage | Num Spectra |
|-----------------------|-------------------|--------------|----------------|-------------|
| Total (Non-Redundant) | 1                 | 2            | 5.62           | 21.0        |

**Peptides:**

| Observed | Mr(expt)  | Mr(calc)  | Mass Error (ppm) | Charge | Score | Score Delta | Peptide      | Group | Replicate |
|----------|-----------|-----------|------------------|--------|-------|-------------|--------------|-------|-----------|
| 437.051  | 1308.1296 | 1307.4625 | 510.22           | 3      | 2.84  | 1.16        | KGYVGIHSSGFR | LYK   | rep2      |
| 654.6848 | 1307.354  | 1307.4625 | 82.96            | 2      | 2.42  | 0.91        | KGYVGIHSSGFR | LYT   | rep1      |
| 711.6817 | 1421.3477 | 1421.6919 | 242.1            | 2      | 2.53  | 1.17        | LTLHGLVQHYIK | LYT   | rep1      |
| 475.0193 | 1422.0344 | 1421.6919 | 240.91           | 3      | 2.52  | 0.95        | LTLHGLVQHYIK | LYK   | rep2      |

**Matching Genes:**

[NP\\_568244.1](#) (DEAD/DEAH box helicase, putative (RH15) [Arabidopsis thaliana])

**Protein Group 298**

**Expression Quality:**

| Group                 | Group Probability | Num Peptides | % Seq Coverage | Num Spectra |
|-----------------------|-------------------|--------------|----------------|-------------|
| Total (Non-Redundant) | 1                 | 1            | 3.73           | 11.0        |

**Peptides:**

| Observed | Mr(expt) | Mr(calc) | Mass Error (ppm) | Charge | Score | Score Delta | Peptide | Group | Replicate |
|----------|----------|----------|------------------|--------|-------|-------------|---------|-------|-----------|
|----------|----------|----------|------------------|--------|-------|-------------|---------|-------|-----------|

|          |           |          |        |   |      |      |                     |     |      |
|----------|-----------|----------|--------|---|------|------|---------------------|-----|------|
| 777.9296 | 2330.7652 | 2331.425 | 283.01 | 3 | 5.35 | 3.21 | FNFSHGSHEYHQETLDNLR | LYT | rep1 |
| 778.2279 | 2331.6602 | 2331.425 | 100.88 | 3 | 5.25 | 2.72 | FNFSHGSHEYHQETLDNLR | LYK | rep3 |

**Matching Genes:**

[NP\\_196474.1](#) (pyruvate kinase, putative [Arabidopsis thaliana])

**Protein Group 299**

**Expression Quality:**

| Group                 | Group Probability | Num Peptides | % Seq Coverage | Num Spectra |
|-----------------------|-------------------|--------------|----------------|-------------|
| Total (Non-Redundant) | 1                 | 2            | 9.11           | 3.0         |

**Peptides:**

| Observed | Mr(expt)  | Mr(calc)  | Mass Error (ppm) | Charge | Score | Score Delta | Peptide               | Group | Replicate |
|----------|-----------|-----------|------------------|--------|-------|-------------|-----------------------|-------|-----------|
| 777.7306 | 2330.1683 | 2330.4971 | 141.07           | 3      | 3.2   | 1.06        | AFVHWYVGEEMEEGEFSEAR  | LYT   | rep3      |
| 795.9659 | 2384.8744 | 2385.6003 | 304.32           | 3      | 2.12  | 0.73        | QLFHPEQLISGKEDAANNFAR | LYK   | rep1      |
| 796.0156 | 2385.0234 | 2385.6003 | 241.84           | 3      | 1.81  | 0.6         | QLFHPEQLISGKEDAANNFAR | LYT   | rep2      |

**Matching Genes:**

[NP\\_171974.1](#) (TUA4 (tubulin alpha-4 chain) [Arabidopsis thaliana])

**Protein Group 300**

**Expression Quality:**

| Group                 | Group Probability | Num Peptides | % Seq Coverage | Num Spectra |
|-----------------------|-------------------|--------------|----------------|-------------|
| Total (Non-Redundant) | 1                 | 1            | 16.88          | 8.0         |

**Peptides:**

| Observed | Mr(expt)  | Mr(calc)  | Mass Error (ppm) | Charge | Score | Score Delta | Peptide                    | Group | Replicate |
|----------|-----------|-----------|------------------|--------|-------|-------------|----------------------------|-------|-----------|
| 1010.85  | 3029.5264 | 3028.3418 | 391.19           | 3      | 5.2   | 2.8         | WAIENLADKGDTIYIIHTLPLSGDES | LYT   | rep1      |

|           |           |           |        |   |     |     |                             |     |      |
|-----------|-----------|-----------|--------|---|-----|-----|-----------------------------|-----|------|
| 1010.3279 | 3027.9602 | 3028.3418 | 126.02 | 3 | 4.7 | 2.8 | WAIENLADKGDITYIIHTLPLSGDESR | LYK | rep2 |
|-----------|-----------|-----------|--------|---|-----|-----|-----------------------------|-----|------|

**Matching Genes:**

[NP\\_566991.2](#) (universal stress protein (USP) family protein [Arabidopsis thaliana])

**Protein Group 301**

**Expression Quality:**

| Group                 | Group Probability | Num Peptides | % Seq Coverage | Num Spectra |
|-----------------------|-------------------|--------------|----------------|-------------|
| Total (Non-Redundant) | 1                 | 2            | 32.9           | 13.0        |

**Peptides:**

| Observed  | Mr(expt)  | Mr(calc)  | Mass Error (ppm) | Charge | Score | Score Delta | Peptide                                                         | Group | Replicate |
|-----------|-----------|-----------|------------------|--------|-------|-------------|-----------------------------------------------------------------|-------|-----------|
| 1080.7748 | 3239.3009 | 3240.4164 | 344.27           | 3      | 1.86  | 0.25        | AGACSTCAGQIVSGNVDQSDGSFLEDHLEK : +57.05000 (C4); +57.05000 (C7) | LYT   | rep1      |
| 1080.8876 | 3239.6392 | 3240.4164 | 239.84           | 3      | 1.82  | 0.61        | AGACSTCAGQIVSGNVDQSDGSFLEDHLEK : +57.05000 (C4); +57.05000 (C7) | LYK   | rep2      |
| 1175.4651 | 2348.9146 | 2348.6638 | 106.78           | 2      | 3.32  | 1.54        | GYVLTCVAYPQSDCVIHTK : +57.05000 (C6); +57.05000 (C14)           | LYK   | rep3      |
| 783.7561  | 2348.2448 | 2348.6638 | 178.39           | 3      | 3.08  | 1.29        | GYVLTCVAYPQSDCVIHTK : +57.05000 (C6); +57.05000 (C14)           | LYT   | rep1      |

**Matching Genes:**

[NP\\_180320.1](#) (ATFD3 (FERREDOXIN 3); electron carrier [Arabidopsis thaliana])

**Protein Group 302**

**Expression Quality:**

| Group                 | Group Probability | Num Peptides | % Seq Coverage | Num Spectra |
|-----------------------|-------------------|--------------|----------------|-------------|
| Total (Non-Redundant) | 1                 | 2            | 6.63           | 13.0        |

**Peptides:**

| Observed | Mr(expt)  | Mr(calc)  | Mass Error (ppm) | Charge | Score | Score Delta | Peptide                       | Group | Replicate |
|----------|-----------|-----------|------------------|--------|-------|-------------|-------------------------------|-------|-----------|
| 480.7554 | 1439.2426 | 1438.5718 | 466.33           | 3      | 1.7   | 0.52        | HYNKDFGIECR : +57.05000 (C10) | LYT   | rep2      |
| 775.7342 | 1549.4527 | 1549.8248 | 240.12           | 2      | 3.35  | 1.76        | KLPIHHIPGPEGVR                | LYK   | rep3      |
| 775.9152 | 1549.8147 | 1549.8248 | 6.51             | 2      | 2.52  | 1.08        | KLPIHHIPGPEGVR                | LYT   | rep3      |

**Matching Genes:**

[NP\\_198236.1](#) (GME (GDP-D-MANNOSE 3',5'-EPIMERASE); GDP-mannose 3,5-epimerase/ NAD binding / catalytic [Arabidopsis thaliana])

**Protein Group 303**

**Expression Quality:**

| Group                 | Group Probability | Num Peptides | % Seq Coverage | Num Spectra |
|-----------------------|-------------------|--------------|----------------|-------------|
| Total (Non-Redundant) | 1                 | 2            | 14.43          | 3.0         |

**Peptides:**

| Observed  | Mr(expt)  | Mr(calc)  | Mass Error (ppm) | Charge | Score | Score Delta | Peptide                                           | Group | Replicate |
|-----------|-----------|-----------|------------------|--------|-------|-------------|---------------------------------------------------|-------|-----------|
| 1152.9747 | 3455.9007 | 3457.9216 | 584.43           | 3      | 3.34  | 1.39        | KGDALLFFNLHPDAIPDPLSLHGGCPVIEGK : +57.05000 (C25) | LYK   | rep3      |
| 487.0735  | 1458.197  | 1457.5069 | 473.44           | 3      | 1.67  | 0.62        | YDAHFDYFHDK                                       | LYK   | rep2      |
| 729.4446  | 1456.8736 | 1457.5069 | 434.56           | 2      | 1.08  | 0.17        | YDAHFDYFHDK                                       | LYT   | rep3      |

**Matching Genes:**

[NP\\_197391.1](#) (oxidoreductase, 2OG-Fe(II) oxygenase family protein [Arabidopsis thaliana])

**Protein Group 304**

**Expression Quality:**

| Group                 | Group Probability | Num Peptides | % Seq Coverage | Num Spectra |
|-----------------------|-------------------|--------------|----------------|-------------|
| Total (Non-Redundant) | 1                 | 1            | 15.27          | 8.0         |

**Peptides:**

| Observed | Mr(expt)  | Mr(calc)  | Mass Error (ppm) | Charge | Score | Score Delta | Peptide                               | Group | Replicate |
|----------|-----------|-----------|------------------|--------|-------|-------------|---------------------------------------|-------|-----------|
| 774.7839 | 2321.3283 | 2321.6612 | 143.39           | 3      | 4.99  | 2.75        | KPWQITGPCAHPEYLEAVPK : +57.05000 (C9) | LYK   | rep3      |
| 774.8029 | 2321.3851 | 2321.6612 | 118.94           | 3      | 4.31  | 2.5         | KPWQITGPCAHPEYLEAVPK : +57.05000 (C9) | LYT   | rep3      |

**Matching Genes:**

[NP\\_196423.1](#) (unknown protein [Arabidopsis thaliana])

**Protein Group 305**

**Expression Quality:**

| Group                 | Group Probability | Num Peptides | % Seq Coverage | Num Spectra |
|-----------------------|-------------------|--------------|----------------|-------------|
| Total (Non-Redundant) | 1                 | 2            | 13.41          | 7.0         |

**Peptides:**

| Observed | Mr(expt)  | Mr(calc)  | Mass Error (ppm) | Charge | Score | Score Delta | Peptide      | Group | Replicate |
|----------|-----------|-----------|------------------|--------|-------|-------------|--------------|-------|-----------|
| 615.4823 | 1228.949  | 1229.4186 | 381.93           | 2      | 1.9   | 0.88        | GMPHKFYHGR   | LYT   | rep1      |
| 410.9266 | 1229.7562 | 1229.4186 | 274.67           | 3      | 1.3   | 0.28        | GMPHKFYHGR   | LYK   | rep1      |
| 744.6833 | 1487.3509 | 1487.672  | 215.85           | 2      | 3.02  | 1.65        | IHVRVEHVQQSR | LYT   | rep1      |
| 497.1914 | 1488.5507 | 1487.672  | 590.69           | 3      | 2.26  | 0.79        | IHVRVEHVQQSR | LYK   | rep2      |

**Matching Genes:**

[NP\\_563847.1](#) (60S ribosomal protein L21 (RPL21A) [Arabidopsis thaliana])

**Protein Group 306**

**Expression Quality:**

| Group                 | Group Probability | Num Peptides | % Seq Coverage | Num Spectra |
|-----------------------|-------------------|--------------|----------------|-------------|
| Total (Non-Redundant) | 1                 | 1            | 16.96          | 10.0        |

**Peptides:**

| Observed  | Mr(expt)  | Mr(calc)  | Mass Error (ppm) | Charge | Score | Score Delta | Peptide                               | Group | Replicate |
|-----------|-----------|-----------|------------------|--------|-------|-------------|---------------------------------------|-------|-----------|
| 1006.7776 | 2011.5396 | 2012.1742 | 315.4            | 2      | 4.85  | 2.67        | VGVHHYNGNNVDLGTACGK : +57.05000 (C17) | LYK   | rep3      |
| 671.9629  | 2012.8652 | 2012.1742 | 343.39           | 3      | 3.24  | 1.67        | VGVHHYNGNNVDLGTACGK : +57.05000 (C17) | LYT   | rep3      |

**Matching Genes:**

[NP\\_565164.1](#) (60S ribosomal protein L30 (RPL30B) [Arabidopsis thaliana])

**Protein Group 307**

**Expression Quality:**

| Group                 | Group Probability | Num Peptides | % Seq Coverage | Num Spectra |
|-----------------------|-------------------|--------------|----------------|-------------|
| Total (Non-Redundant) | 1                 | 2            | 14.88          | 8.0         |

**Peptides:**

| Observed  | Mr(expt)  | Mr(calc)  | Mass Error (ppm) | Charge | Score | Score Delta | Peptide                                                  | Group | Replicate |
|-----------|-----------|-----------|------------------|--------|-------|-------------|----------------------------------------------------------|-------|-----------|
| 1458.1923 | 4371.5533 | 4373.0563 | 343.69           | 3      | 1.76  | 0.51        | INYYPPCPRPDALGVPAHTDLSGITLLVPNEVPGLQVFK : +57.05000 (C7) | LYK   | rep2      |
| 437.4095  | 1309.205  | 1308.4953 | 542.32           | 3      | 3.07  | 0.65        | KAWVDHLFHR                                               | LYK   | rep2      |
| 437.2184  | 1308.6317 | 1308.4953 | 104.19           | 3      | 3.06  | 0.68        | KAWVDHLFHR                                               | LYT   | rep1      |

**Matching Genes:**

[NP\\_196481.1](#) (FLS (FLAVONOL SYNTHASE) [Arabidopsis thaliana])

**Protein Group 308**

**Expression Quality:**

| Group                 | Group Probability | Num Peptides | % Seq Coverage | Num Spectra |
|-----------------------|-------------------|--------------|----------------|-------------|
| Total (Non-Redundant) | 1                 | 2            | 5.51           | 6.0         |

**Peptides:**

| Observed | Mr(expt)  | Mr(calc)  | Mass Error (ppm) | Charge | Score | Score Delta | Peptide                            | Group | Replicate |
|----------|-----------|-----------|------------------|--------|-------|-------------|------------------------------------|-------|-----------|
| 439.4747 | 1315.4007 | 1315.5261 | 95.32            | 3      | 2.17  | 1.02        | APIETAVKPPHR                       | LYT   | rep1      |
| 658.6872 | 1315.3587 | 1315.5261 | 127.27           | 2      | 1.81  | 0.52        | APIETAVKPPHR                       | LYK   | rep1      |
| 655.6823 | 1964.0233 | 1964.2793 | 130.32           | 3      | 2.63  | 0.74        | MVCAQAANANPLYLHYK : +57.05000 (C3) | LYT   | rep1      |

**Matching Genes:**

[NP\\_194713.1](#) (MTO2 (METHIONINE OVER-ACCUMULATOR); threonine synthase [Arabidopsis thaliana])

**Protein Group 309**

**Expression Quality:**

| Group                 | Group Probability | Num Peptides | % Seq Coverage | Num Spectra |
|-----------------------|-------------------|--------------|----------------|-------------|
| Total (Non-Redundant) | 1                 | 2            | 10.14          | 22.0        |

**Peptides:**

| Observed | Mr(expt)  | Mr(calc)  | Mass Error (ppm) | Charge | Score | Score Delta | Peptide     | Group | Replicate |
|----------|-----------|-----------|------------------|--------|-------|-------------|-------------|-------|-----------|
| 398.9938 | 1193.9578 | 1193.3196 | 534.88           | 3      | 2.37  | 1.18        | HATFVPHTAGR | LYK   | rep1      |
| 399.1562 | 1194.4451 | 1193.3196 | 943.19           | 3      | 2.25  | 1.09        | HATFVPHTAGR | LYT   | rep2      |
| 387.6208 | 1159.8391 | 1159.3883 | 388.81           | 3      | 2.42  | 0.61        | LTNSLMMHGR  | LYT   | rep1      |

**Matching Genes:**

[NP\\_001031502.1](#) (ATRPS5B (RIBOSOMAL PROTEIN 5B); structural constituent of ribosome [Arabidopsis thaliana])

**Protein Group 310**

**Expression Quality:**

| Group                 | Group Probability | Num Peptides | % Seq Coverage | Num Spectra |
|-----------------------|-------------------|--------------|----------------|-------------|
| Total (Non-Redundant) | 1                 | 1            | 5.7            | 18.0        |

**Peptides:**



| Observed  | Mr(expt)  | Mr(calc)  | Mass Error (ppm) | Charge | Score | Score Delta | Peptide              | Group | Replicate |
|-----------|-----------|-----------|------------------|--------|-------|-------------|----------------------|-------|-----------|
| 1032.2652 | 2062.5147 | 2063.3303 | 395.3            | 2      | 4.77  | 3.06        | GSGGGRPHALPIFLYAQGHK | LYT   | rep2      |
| 1032.2232 | 2062.4307 | 2063.3303 | 436              | 2      | 4.14  | 2.4         | GSGGGRPHALPIFLYAQGHK | LYK   | rep3      |

**Matching Genes:**

[NP\\_568483.1](#) (meprin and TRAF homology domain-containing protein / MATH domain-containing protein [Arabidopsis thaliana])

**Protein Group 311**

**Expression Quality:**

| Group                 | Group Probability | Num Peptides | % Seq Coverage | Num Spectra |
|-----------------------|-------------------|--------------|----------------|-------------|
| Total (Non-Redundant) | 1                 | 2            | 7.37           | 8.0         |

**Peptides:**

| Observed | Mr(expt)  | Mr(calc)  | Mass Error (ppm) | Charge | Score | Score Delta | Peptide                          | Group | Replicate |
|----------|-----------|-----------|------------------|--------|-------|-------------|----------------------------------|-------|-----------|
| 678.1438 | 2031.4079 | 2031.3284 | 39.17            | 3      | 2.77  | 1.31        | HNIGLPLQFAAASFNRK                | LYK   | rep1      |
| 678.1957 | 2031.5636 | 2031.3284 | 115.79           | 3      | 1.77  | 0.69        | HNIGLPLQFAAASFNRK                | LYT   | rep3      |
| 750.068  | 1498.1204 | 1498.7502 | 420.21           | 2      | 1.98  | 0.67        | VASVKPFGACFSTK : +57.05000 (C10) | LYK   | rep2      |
| 750.0711 | 1498.1265 | 1498.7502 | 416.13           | 2      | 1.61  | 0.26        | VASVKPFGACFSTK : +57.05000 (C10) | LYT   | rep2      |

**Matching Genes:**

[NP\\_563679.1](#) (extracellular dermal glycoprotein, putative / EDGP, putative [Arabidopsis thaliana])

**Protein Group 312**

**Expression Quality:**

| Group                 | Group Probability | Num Peptides | % Seq Coverage | Num Spectra |
|-----------------------|-------------------|--------------|----------------|-------------|
| Total (Non-Redundant) | 1                 | 1            | 7.98           | 9.0         |

**Peptides:**

| Observed  | Mr(expt)  | Mr(calc)  | Mass Error (ppm) | Charge | Score | Score Delta | Peptide                              | Group | Replicate |
|-----------|-----------|-----------|------------------|--------|-------|-------------|--------------------------------------|-------|-----------|
| 1211.9781 | 3632.911  | 3635.1418 | 613.69           | 3      | 4.73  | 2.41        | IVGFHGSSSDLIHSVGVYIIPSTTPLTPPVSGGLTK | LYK   | rep3      |
| 1212.2604 | 3633.7577 | 3635.1418 | 380.78           | 3      | 3.79  | 2.02        | IVGFHGSSSDLIHSVGVYIIPSTTPLTPPVSGGLTK | LYT   | rep3      |

**Matching Genes:**

[NP\\_001030712.1](#) (JR1 (Jacalin lectin family protein) [Arabidopsis thaliana])

**Protein Group 313**

**Expression Quality:**

| Group                 | Group Probability | Num Peptides | % Seq Coverage | Num Spectra |
|-----------------------|-------------------|--------------|----------------|-------------|
| Total (Non-Redundant) | 1                 | 2            | 8.13           | 12.0        |

**Peptides:**

| Observed | Mr(expt)  | Mr(calc)  | Mass Error (ppm) | Charge | Score | Score Delta | Peptide         | Group | Replicate |
|----------|-----------|-----------|------------------|--------|-------|-------------|-----------------|-------|-----------|
| 545.4691 | 1088.9226 | 1089.2976 | 344.21           | 2      | 2.98  | 1.03        | RFLHVVYR        | LYT   | rep3      |
| 545.5594 | 1089.1031 | 1089.2976 | 178.59           | 2      | 2.5   | 0.59        | RFLHVVYR        | LYK   | rep1      |
| 786.8283 | 1571.6409 | 1570.7927 | 539.98           | 2      | 1.74  | 0.36        | SGEVIKIVNQELGGK | LYT   | rep1      |
| 786.8592 | 1571.7027 | 1570.7927 | 579.3            | 2      | 1.64  | 0.61        | SGEVIKIVNQELGGK | LYK   | rep2      |

**Matching Genes:**

[NP\\_001031025.1](#) (ATGLX1 (GLYOXALASE I HOMOLOG); lactoylglutathione lyase [Arabidopsis thaliana])

**Protein Group 314**

**Expression Quality:**

| Group                 | Group Probability | Num Peptides | % Seq Coverage | Num Spectra |
|-----------------------|-------------------|--------------|----------------|-------------|
| Total (Non-Redundant) | 1                 | 1            | 7.26           | 19.0        |

**Peptides:**

| Observed  | Mr(expt)  | Mr(calc)  | Mass Error (ppm) | Charge | Score | Score Delta | Peptide           | Group | Replicate |
|-----------|-----------|-----------|------------------|--------|-------|-------------|-------------------|-------|-----------|
| 1003.0231 | 2004.0306 | 2005.2477 | 606.97           | 2      | 4.68  | 2.82        | YFLHQHTIQHGQPATVK | LYK   | rep3      |
| 669.434   | 2005.2784 | 2005.2477 | 15.33            | 3      | 4.06  | 2.42        | YFLHQHTIQHGQPATVK | LYT   | rep2      |

**Matching Genes:**

[NP\\_001031759.1](#) (PBA1 (20S proteasome beta subunit A 1); peptidase [Arabidopsis thaliana])

**Protein Group 315**

**Expression Quality:**

| Group                 | Group Probability | Num Peptides | % Seq Coverage | Num Spectra |
|-----------------------|-------------------|--------------|----------------|-------------|
| Total (Non-Redundant) | 1                 | 2            | 14.44          | 12.0        |

**Peptides:**

| Observed  | Mr(expt)  | Mr(calc)  | Mass Error (ppm) | Charge | Score | Score Delta | Peptide                      | Group | Replicate |
|-----------|-----------|-----------|------------------|--------|-------|-------------|------------------------------|-------|-----------|
| 1031.5214 | 3091.5406 | 3090.5708 | 313.8            | 3      | 2.84  | 1.4         | GVMDDQTVGEGTHFLIPILQRPHIFDIR | LYK   | rep2      |
| 1031.1693 | 3090.4845 | 3090.5708 | 27.93            | 3      | 2.38  | 0.67        | GVMDDQTVGEGTHFLIPILQRPHIFDIR | LYT   | rep2      |
| 464.556   | 1390.6446 | 1390.5466 | 70.47            | 3      | 1.83  | 0.58        | TKPHTFSSISGTK                | LYT   | rep1      |
| 696.1021  | 1390.1885 | 1390.5466 | 257.53           | 2      | 1.76  | 0.5         | TKPHTFSSISGTK                | LYK   | rep2      |

**Matching Genes:**

[NP\\_198893.1](#) (ATPHB3 (PROHIBITIN 3) [Arabidopsis thaliana])

**Protein Group 316**

**Expression Quality:**

| Group                 | Group Probability | Num Peptides | % Seq Coverage | Num Spectra |
|-----------------------|-------------------|--------------|----------------|-------------|
| Total (Non-Redundant) | 1                 | 1            | 3.55           | 3.0         |

**Peptides:**

| Observed | Mr(expt)  | Mr(calc)  | Mass Error (ppm) | Charge | Score | Score Delta | Peptide             | Group | Replicate |
|----------|-----------|-----------|------------------|--------|-------|-------------|---------------------|-------|-----------|
| 691.6854 | 2072.0328 | 2072.1599 | 61.34            | 3      | 4.66  | 2.65        | HFQNEPDGDGTSAVHVYAK | LYT   | rep3      |
| 691.4933 | 2071.4564 | 2072.1599 | 339.51           | 3      | 3.54  | 1.97        | HFQNEPDGDGTSAVHVYAK | LYK   | rep2      |

**Matching Genes:**

[NP\\_191872.1](#) (RANGAP1 (RAN GTPASE ACTIVATING PROTEIN 1); RAN GTPase activator [Arabidopsis thaliana])

**Protein Group 317**

**Expression Quality:**

| Group                 | Group Probability | Num Peptides | % Seq Coverage | Num Spectra |
|-----------------------|-------------------|--------------|----------------|-------------|
| Total (Non-Redundant) | 1                 | 1            | 23.53          | 7.0         |

**Peptides:**

| Observed  | Mr(expt)  | Mr(calc)  | Mass Error (ppm) | Charge | Score | Score Delta | Peptide                                            | Group | Replicate |
|-----------|-----------|-----------|------------------|--------|-------|-------------|----------------------------------------------------|-------|-----------|
| 1147.2169 | 3438.6273 | 3438.8303 | 59.05            | 3      | 4.56  | 2.51        | FQSSAVAALQEAAEAYLVGLFEDTNLCAIHAK : +57.05000 (C27) | LYT   | rep1      |
| 1147.1732 | 3438.4962 | 3438.8303 | 97.17            | 3      | 4.24  | 2.08        | FQSSAVAALQEAAEAYLVGLFEDTNLCAIHAK : +57.05000 (C27) | LYK   | rep3      |

**Matching Genes:**

[NP\\_189372.1](#) (histone H3 [Arabidopsis thaliana])

**Protein Group 318**

**Expression Quality:**

| Group                 | Group Probability | Num Peptides | % Seq Coverage | Num Spectra |
|-----------------------|-------------------|--------------|----------------|-------------|
| Total (Non-Redundant) | 0.97              | 2            | 20.16          | 10.0        |

**Peptides:**

| Observed | Mr(expt) | Mr(calc) | Mass Error (ppm) | Charge | Score | Score Delta | Peptide | Group | Replicate |
|----------|----------|----------|------------------|--------|-------|-------------|---------|-------|-----------|
|----------|----------|----------|------------------|--------|-------|-------------|---------|-------|-----------|

|          |           |           |        |   |      |      |                                |     |      |
|----------|-----------|-----------|--------|---|------|------|--------------------------------|-----|------|
| 455.6441 | 1363.9088 | 1363.5212 | 284.27 | 3 | 2.48 | 0.5  | AGLEEPLEQIHK                   | LYT | rep1 |
| 455.7327 | 1364.1747 | 1363.5212 | 479.26 | 3 | 1.99 | 0.29 | AGLEEPLEQIHK                   | LYK | rep2 |
| 498.1592 | 1491.4541 | 1491.5899 | 91.04  | 3 | 2.07 | 0.47 | KAPCGEGTNTWDR : +57.05000 (C4) | LYT | rep1 |
| 746.4355 | 1490.8553 | 1491.5899 | 492.49 | 2 | 1.98 | 0.63 | KAPCGEGTNTWDR : +57.05000 (C4) | LYK | rep3 |

**Matching Genes:**

[NP\\_001078781.1](#) (40S ribosomal protein S20 (RPS20C) [Arabidopsis thaliana])

**Protein Group 319**

**Expression Quality:**

| Group                 | Group Probability | Num Peptides | % Seq Coverage | Num Spectra |
|-----------------------|-------------------|--------------|----------------|-------------|
| Total (Non-Redundant) | 0.98              | 3            | 9.38           | 5.0         |

**Peptides:**

| Observed  | Mr(expt)  | Mr(calc)  | Mass Error (ppm) | Charge | Score | Score Delta | Peptide                               | Group | Replicate |
|-----------|-----------|-----------|------------------|--------|-------|-------------|---------------------------------------|-------|-----------|
| 731.6004  | 1461.1851 | 1460.5358 | 444.59           | 2      | 1.5   | 0.48        | PPGSGSTMNGQSANR                       | LYK   | rep3      |
| 731.6336  | 1461.2515 | 1460.5358 | 490.06           | 2      | 1.23  | 0.3         | PPGSGSTMNGQSANR                       | LYT   | rep1      |
| 403.4691  | 1207.3839 | 1208.266  | 730.04           | 3      | 1.68  | 0.3         | QMSSSNGVGPGR : +32.00000 (M2)         | LYT   | rep2      |
| 1318.8934 | 3953.6568 | 3955.2715 | 408.23           | 3      | 1.35  | 0.44        | SFLSSLR SILSSPSQSFVLSSPSDSSDIFDFSSFHR | LYT   | rep3      |

**Matching Genes:**

[NP\\_973512.1](#) (unknown protein [Arabidopsis thaliana])

**Protein Group 320**

**Expression Quality:**

| Group                 | Group Probability | Num Peptides | % Seq Coverage | Num Spectra |
|-----------------------|-------------------|--------------|----------------|-------------|
| Total (Non-Redundant) | 1                 | 2            | 7.27           | 6.0         |

**Peptides:**

| Observed | Mr(expt)  | Mr(calc)  | Mass Error (ppm) | Charge | Score | Score Delta | Peptide        | Group | Replicate |
|----------|-----------|-----------|------------------|--------|-------|-------------|----------------|-------|-----------|
| 808.1221 | 1614.2286 | 1614.8536 | 387.08           | 2      | 2.9   | 1.28        | GLLLVDHQLAHDKR | LYK   | rep3      |
| 539.1129 | 1614.3153 | 1614.8536 | 333.38           | 3      | 1.93  | 0.76        | GLLLVDHQLAHDKR | LYT   | rep3      |
| 420.9929 | 1259.9551 | 1259.4211 | 423.98           | 3      | 1.61  | 0.28        | HKNTAFSWLR     | LYT   | rep2      |

**Matching Genes:**

[NP\\_567641.1](#) (PRXR1 (peroxidase 42); peroxidase [Arabidopsis thaliana])

**Protein Group 321****Expression Quality:**

| Group                 | Group Probability | Num Peptides | % Seq Coverage | Num Spectra |
|-----------------------|-------------------|--------------|----------------|-------------|
| Total (Non-Redundant) | 0.99              | 2            | 7.81           | 5.0         |

**Peptides:**

| Observed | Mr(expt)  | Mr(calc)  | Mass Error (ppm) | Charge | Score | Score Delta | Peptide     | Group | Replicate |
|----------|-----------|-----------|------------------|--------|-------|-------------|-------------|-------|-----------|
| 556.3175 | 1110.6194 | 1111.3234 | 633.42           | 2      | 1.88  | 0.75        | HAMVASGALVR | LYT   | rep1      |
| 556.3272 | 1110.6387 | 1111.3234 | 616.06           | 2      | 1.57  | 0.73        | HAMVASGALVR | LYK   | rep2      |
| 421.1401 | 1260.3969 | 1260.4708 | 58.61            | 3      | 2.61  | 0.23        | HRTL MNVFDK | LYT   | rep1      |

**Matching Genes:**

[NP\\_001078808.1](#) (GAMMA CA3 (GAMMA CARBONIC ANHYDRASE 3) [Arabidopsis thaliana])

**Protein Group 322****Expression Quality:**

| Group                 | Group Probability | Num Peptides | % Seq Coverage | Num Spectra |
|-----------------------|-------------------|--------------|----------------|-------------|
| Total (Non-Redundant) | 1                 | 1            | 6.92           | 5.0         |

**Peptides:**

| Observed | Mr(expt)  | Mr(calc)  | Mass Error (ppm) | Charge | Score | Score Delta | Peptide                    | Group | Replicate |
|----------|-----------|-----------|------------------|--------|-------|-------------|----------------------------|-------|-----------|
| 965.7567 | 2894.2467 | 2895.2368 | 341.99           | 3      | 4.49  | 2.36        | DFGSIDILVHSLANGPEVSKPLETSR | LYK   | rep1      |
| 965.8851 | 2894.6319 | 2895.2368 | 208.92           | 3      | 1.9   | 0.42        | DFGSIDILVHSLANGPEVSKPLETSR | LYT   | rep1      |

**Matching Genes:**

[NP\\_565331.1](#) (MOD1 (MOSAIC DEATH 1); enoyl-[acyl-carrier-protein] reductase (NADH)/ oxidoreductase [Arabidopsis thaliana])

**Protein Group 323****Expression Quality:**

| Group                 | Group Probability | Num Peptides | % Seq Coverage | Num Spectra |
|-----------------------|-------------------|--------------|----------------|-------------|
| Total (Non-Redundant) | 1                 | 1            | 16.67          | 6.0         |

**Peptides:**

| Observed  | Mr(expt)  | Mr(calc)  | Mass Error (ppm) | Charge | Score | Score Delta | Peptide                            | Group | Replicate |
|-----------|-----------|-----------|------------------|--------|-------|-------------|------------------------------------|-------|-----------|
| 1206.5634 | 3616.6666 | 3615.9097 | 209.33           | 3      | 4.48  | 1.09        | HTGPGFLSMANAGQDTNGSQFFITTVTTSWLDGR | LYT   | rep1      |
| 1206.4965 | 3616.4659 | 3615.9097 | 153.83           | 3      | 1.94  | 0.59        | HTGPGFLSMANAGQDTNGSQFFITTVTTSWLDGR | LYK   | rep1      |

**Matching Genes:**

[NP\\_200679.1](#) (ROC7 (rotamase CyP 7); peptidyl-prolyl cis-trans isomerase [Arabidopsis thaliana])

**Protein Group 324****Expression Quality:**

| Group                 | Group Probability | Num Peptides | % Seq Coverage | Num Spectra |
|-----------------------|-------------------|--------------|----------------|-------------|
| Total (Non-Redundant) | 1                 | 1            | 5.6            | 6.0         |

**Peptides:**

| Observed | Mr(expt)  | Mr(calc)  | Mass Error (ppm) | Charge | Score | Score Delta | Peptide              | Group | Replicate |
|----------|-----------|-----------|------------------|--------|-------|-------------|----------------------|-------|-----------|
| 750.4999 | 2248.4762 | 2248.5947 | 52.73            | 3      | 4.48  | 2.9         | HAVGLVRPVSVAFEVVHEFR | LYT   | rep3      |
| 750.4757 | 2248.4036 | 2248.5947 | 84.97            | 3      | 3.99  | 2.26        | HAVGLVRPVSVAFEVVHEFR | LYK   | rep1      |

**Matching Genes:**

[NP\\_001030812.1](#) (cysteine-type peptidase [Arabidopsis thaliana])

**Protein Group 325**

**Expression Quality:**

| Group                 | Group Probability | Num Peptides | % Seq Coverage | Num Spectra |
|-----------------------|-------------------|--------------|----------------|-------------|
| Total (Non-Redundant) | 1                 | 1            | 7.88           | 4.0         |

**Peptides:**

| Observed  | Mr(expt)  | Mr(calc)  | Mass Error (ppm) | Charge | Score | Score Delta | Peptide                                              | Group | Replicate |
|-----------|-----------|-----------|------------------|--------|-------|-------------|------------------------------------------------------|-------|-----------|
| 1262.434  | 3784.2784 | 3784.3176 | 10.36            | 3      | 4.43  | 2.06        | SIGNIVTGDDLQTCVISHGALLSLLSLLTHNHKK : +57.05000 (C15) | LYK   | rep2      |
| 1261.9784 | 3782.9117 | 3784.3176 | 371.51           | 3      | 3.26  | 1.33        | SIGNIVTGDDLQTCVISHGALLSLLSLLTHNHKK : +57.05000 (C15) | LYT   | rep3      |

**Matching Genes:**

[NP\\_567485.1](#) (importin alpha-2, putative (IMPA-2) [Arabidopsis thaliana])

**Protein Group 326**

**Expression Quality:**

| Group                 | Group Probability | Num Peptides | % Seq Coverage | Num Spectra |
|-----------------------|-------------------|--------------|----------------|-------------|
| Total (Non-Redundant) | 1                 | 2            | 3.44           | 6.0         |

**Peptides:**

| Observed | Mr(expt) | Mr(calc) | Mass Error (ppm) | Charge | Score | Score Delta | Peptide | Group | Replicate |
|----------|----------|----------|------------------|--------|-------|-------------|---------|-------|-----------|
|----------|----------|----------|------------------|--------|-------|-------------|---------|-------|-----------|



|          |           |           |        |   |      |      |                         |     |      |
|----------|-----------|-----------|--------|---|------|------|-------------------------|-----|------|
| 795.7162 | 2384.1251 | 2384.74   | 257.85 | 3 | 2.57 | 0.8  | KIHLSLVANPSHLEAADSVMVGK | LYK | rep1 |
| 733.3634 | 1464.7112 | 1465.5753 | 589.59 | 2 | 1.85 | 0.22 | YHLGTSYDRPTR            | LYT | rep3 |
| 733.4788 | 1464.9419 | 1465.5753 | 432.17 | 2 | 1.8  | 0.48 | YHLGTSYDRPTR            | LYK | rep2 |

**Matching Genes:**

[NP\\_191101.2](#) (2-oxoglutarate dehydrogenase E1 component, putative / oxoglutarate decarboxylase, putative / alpha-ketoglutaric dehydrogenase, putative [Arabidopsis thaliana])

**Protein Group 327**

**Expression Quality:**

| Group                 | Group Probability | Num Peptides | % Seq Coverage | Num Spectra |
|-----------------------|-------------------|--------------|----------------|-------------|
| Total (Non-Redundant) | 1                 | 2            | 20.49          | 8.0         |

**Peptides:**

| Observed | Mr(expt)  | Mr(calc)  | Mass Error (ppm) | Charge | Score | Score Delta | Peptide                        | Group | Replicate |
|----------|-----------|-----------|------------------|--------|-------|-------------|--------------------------------|-------|-----------|
| 436.2758 | 1305.804  | 1305.4849 | 244.45           | 3      | 2.35  | 0.78        | AGLEAPLEQIHK                   | LYT   | rep1      |
| 498.1592 | 1491.4541 | 1491.5899 | 91.04            | 3      | 2.07  | 0.47        | KAPCGEGTNTWDR : +57.05000 (C4) | LYT   | rep1      |
| 746.4355 | 1490.8553 | 1491.5899 | 492.49           | 2      | 1.98  | 0.63        | KAPCGEGTNTWDR : +57.05000 (C4) | LYK   | rep3      |

**Matching Genes:**

[NP\\_001030826.1](#) (structural constituent of ribosome [Arabidopsis thaliana])

**Protein Group 328**

**Expression Quality:**

| Group                 | Group Probability | Num Peptides | % Seq Coverage | Num Spectra |
|-----------------------|-------------------|--------------|----------------|-------------|
| Total (Non-Redundant) | 1                 | 1            | 5.71           | 6.0         |

**Peptides:**

| Observed | Mr(expt) | Mr(calc) | Mass Error (ppm) | Charge | Score | Score Delta | Peptide                   | Group | Replicate |
|----------|----------|----------|------------------|--------|-------|-------------|---------------------------|-------|-----------|
| 876.6885 | 2627.042 | 2627.918 | 333.35           | 3      | 4.42  | 2.21        | SHGGLSYGQNGSHFEPKPVPPPIPK | LYK   | rep3      |
| 876.9548 | 2627.841 | 2627.918 | 29.27            | 3      | 2.23  | 1.12        | SHGGLSYGQNGSHFEPKPVPPPIPK | LYT   | rep1      |

**Matching Genes:**

[NP\\_172853.1](#) (protein kinase family protein / ankyrin repeat family protein [Arabidopsis thaliana])

**Protein Group 329**

**Expression Quality:**

| Group                 | Group Probability | Num Peptides | % Seq Coverage | Num Spectra |
|-----------------------|-------------------|--------------|----------------|-------------|
| Total (Non-Redundant) | 1                 | 1            | 4.31           | 7.0         |

**Peptides:**

| Observed | Mr(expt)  | Mr(calc) | Mass Error (ppm) | Charge | Score | Score Delta | Peptide           | Group | Replicate |
|----------|-----------|----------|------------------|--------|-------|-------------|-------------------|-------|-----------|
| 904.6994 | 1807.3831 | 1806.943 | 243.57           | 2      | 4.42  | 2.77        | GAHEGQGLGNNFLSHIR | LYK   | rep1      |
| 603.4572 | 1807.348  | 1806.943 | 224.14           | 3      | 3.01  | 1.54        | GAHEGQGLGNNFLSHIR | LYT   | rep3      |

**Matching Genes:**

[NP\\_174346.1](#) (GTP binding [Arabidopsis thaliana])

**Protein Group 330**

**Expression Quality:**

| Group                 | Group Probability | Num Peptides | % Seq Coverage | Num Spectra |
|-----------------------|-------------------|--------------|----------------|-------------|
| Total (Non-Redundant) | 1                 | 2            | 23.15          | 5.0         |

**Peptides:**

| Observed | Mr(expt)  | Mr(calc)  | Mass Error (ppm) | Charge | Score | Score Delta | Peptide      | Group | Replicate |
|----------|-----------|-----------|------------------|--------|-------|-------------|--------------|-------|-----------|
| 464.1771 | 1389.5079 | 1389.6449 | 98.58            | 3      | 2.2   | 0.65        | FKLITPSILSDR | LYT   | rep1      |

|          |           |           |        |   |      |      |               |     |      |
|----------|-----------|-----------|--------|---|------|------|---------------|-----|------|
| 746.5381 | 1491.0606 | 1491.6777 | 413.72 | 2 | 2.2  | 0.9  | MVAAHSSQQIYTR | LYT | rep1 |
| 498.4421 | 1492.3029 | 1491.6777 | 419.14 | 3 | 1.23 | 0.37 | MVAAHSSQQIYTR | LYK | rep1 |

**Matching Genes:**

[NP\\_195631.1](#) (40S ribosomal protein S25 (RPS25E) [Arabidopsis thaliana])

**Protein Group 331**

**Expression Quality:**

| Group                 | Group Probability | Num Peptides | % Seq Coverage | Num Spectra |
|-----------------------|-------------------|--------------|----------------|-------------|
| Total (Non-Redundant) | 1                 | 1            | 18.75          | 4.0         |

**Peptides:**

| Observed  | Mr(expt)  | Mr(calc)  | Mass Error (ppm) | Charge | Score | Score Delta | Peptide                                          | Group | Replicate |
|-----------|-----------|-----------|------------------|--------|-------|-------------|--------------------------------------------------|-------|-----------|
| 1110.2872 | 3327.8382 | 3328.7508 | 274.14           | 3      | 4.4   | 2.36        | NHPHGFVAKPETGQDGTVNLMVWHCTIPGK : +57.05000 (C25) | LYK   | rep1      |
| 1110.4364 | 3328.2857 | 3328.7508 | 139.7            | 3      | 4.1   | 2.2         | NHPHGFVAKPETGQDGTVNLMVWHCTIPGK : +57.05000 (C25) | LYT   | rep3      |

**Matching Genes:**

[NP\\_191346.1](#) (AHUS5 (EMBRYO DEFECTIVE 1637); ubiquitin-protein ligase [Arabidopsis thaliana])

**Protein Group 332**

**Expression Quality:**

| Group                 | Group Probability | Num Peptides | % Seq Coverage | Num Spectra |
|-----------------------|-------------------|--------------|----------------|-------------|
| Total (Non-Redundant) | 1                 | 1            | 7.92           | 4.0         |

**Peptides:**

| Observed  | Mr(expt)  | Mr(calc)  | Mass Error (ppm) | Charge | Score | Score Delta | Peptide                                      | Group | Replicate |
|-----------|-----------|-----------|------------------|--------|-------|-------------|----------------------------------------------|-------|-----------|
| 1057.2782 | 3168.8111 | 3169.6168 | 254.2            | 3      | 4.38  | 2.18        | HDVTEPLLEVDQIYHLACPASPIFYK : +57.05000 (C19) | LYT   | rep3      |

|           |          |           |       |   |      |     |                                               |     |      |
|-----------|----------|-----------|-------|---|------|-----|-----------------------------------------------|-----|------|
| 1057.5922 | 3169.753 | 3169.6168 | 42.96 | 3 | 2.89 | 1.4 | HDVTEPLLIQVDQIYHLACPASPIFYK : +57.05000 (C19) | LYK | rep1 |
|-----------|----------|-----------|-------|---|------|-----|-----------------------------------------------|-----|------|

**Matching Genes:**

NP\_001030820.1 (UXS5 (UDP-Xyl synthase 5); catalytic [Arabidopsis thaliana])

**Protein Group 333**

**Expression Quality:**

| Group                 | Group Probability | Num Peptides | % Seq Coverage | Num Spectra |
|-----------------------|-------------------|--------------|----------------|-------------|
| Total (Non-Redundant) | 1                 | 1            | 14.5           | 4.0         |

**Peptides:**

| Observed | Mr(expt)  | Mr(calc)  | Mass Error (ppm) | Charge | Score | Score Delta | Peptide             | Group | Replicate |
|----------|-----------|-----------|------------------|--------|-------|-------------|---------------------|-------|-----------|
| 994.939  | 1987.8623 | 1988.1659 | 152.67           | 2      | 4.33  | 2.12        | DFEEAGHLAPTGLFLGGEK | LYT   | rep1      |
| 994.809  | 1987.6023 | 1988.1659 | 283.45           | 2      | 3.78  | 1.84        | DFEEAGHLAPTGLFLGGEK | LYK   | rep2      |

**Matching Genes:**

[NP\\_194664.1](#) (PFN2/PRF2/PRO2 (PROFILIN 2); actin binding / protein binding [Arabidopsis thaliana])

**Protein Group 334**

**Expression Quality:**

| Group                 | Group Probability | Num Peptides | % Seq Coverage | Num Spectra |
|-----------------------|-------------------|--------------|----------------|-------------|
| Total (Non-Redundant) | 0.99              | 2            | 23.36          | 3.0         |

**Peptides:**

| Observed | Mr(expt)  | Mr(calc)  | Mass Error (ppm) | Charge | Score | Score Delta | Peptide      | Group | Replicate |
|----------|-----------|-----------|------------------|--------|-------|-------------|--------------|-------|-----------|
| 464.1771 | 1389.5079 | 1389.6449 | 98.58            | 3      | 2.2   | 0.65        | FKLITPSILSDR | LYT   | rep1      |
| 503.558  | 1507.6505 | 1507.6771 | 17.67            | 3      | 2.07  | 0.64        | MVSAHSSQIYTR | LYT   | rep1      |

**Matching Genes:**

[NP\\_001031390.1](#) (structural constituent of ribosome [Arabidopsis thaliana])

---

**Protein Group 335**

**Expression Quality:**

| Group                 | Group Probability | Num Peptides | % Seq Coverage | Num Spectra |
|-----------------------|-------------------|--------------|----------------|-------------|
| Total (Non-Redundant) | 1                 | 3            | 4.21           | 3.0         |

**Peptides:**

| Observed  | Mr(expt)  | Mr(calc)  | Mass Error (ppm) | Charge | Score | Score Delta | Peptide                                                | Group | Replicate |
|-----------|-----------|-----------|------------------|--------|-------|-------------|--------------------------------------------------------|-------|-----------|
| 661.2476  | 1320.4795 | 1320.5816 | 77.33            | 2      | 1.55  | 0.49        | KIPCSSDICK : +57.05000 (C4); +57.05000 (C9)            | LYT   | rep1      |
| 686.8297  | 1371.6438 | 1373.5161 | 1363.12          | 2      | 1.41  | 0.35        | LLYVGPPNETDR                                           | LYT   | rep2      |
| 1074.7969 | 2147.5782 | 2149.5666 | 925.03           | 2      | 1.3   | 0.4         | PPSGILMFGPPGCSKTLMAR : +32.00000 (M7); +57.05000 (C13) | LYT   | rep3      |

**Matching Genes:**

[NP\\_191228.1](#) (CIP111 (CAM INTERACTING PROTEIN 111); ATPase/ calmodulin binding [Arabidopsis thaliana])

---

**Protein Group 336**

**Expression Quality:**

| Group                 | Group Probability | Num Peptides | % Seq Coverage | Num Spectra |
|-----------------------|-------------------|--------------|----------------|-------------|
| Total (Non-Redundant) | 1                 | 2            | 17.69          | 3.0         |

**Peptides:**

| Observed  | Mr(expt)  | Mr(calc)  | Mass Error (ppm) | Charge | Score | Score Delta | Peptide                                                   | Group | Replicate |
|-----------|-----------|-----------|------------------|--------|-------|-------------|-----------------------------------------------------------|-------|-----------|
| 1433.8414 | 4298.5008 | 4299.7083 | 280.82           | 3      | 2.02  | 0.86        | RPYGVGLLVGGLDESGAHLYYNCPSGNYFEYQAFAGSR : +57.05000 ( C23) | LYT   | rep3      |
| 564.0415  | 1126.0674 | 1126.3333 | 236.03           | 2      | 2.18  | 0.9         | SHVVLACVNK : +57.05000 (C7)                               | LYT   | rep3      |

**Matching Genes:**

[NP\\_175158.1](#) (PAF2 (20S proteasome alpha subunit F2); peptidase [Arabidopsis thaliana])

**Protein Group 337****Expression Quality:**

| Group                 | Group Probability | Num Peptides | % Seq Coverage | Num Spectra |
|-----------------------|-------------------|--------------|----------------|-------------|
| Total (Non-Redundant) | 1                 | 1            | 10.43          | 18.0        |

**Peptides:**

| Observed | Mr(expt)  | Mr(calc) | Mass Error (ppm) | Charge | Score | Score Delta | Peptide      | Group | Replicate |
|----------|-----------|----------|------------------|--------|-------|-------------|--------------|-------|-----------|
| 608.4355 | 1214.8553 | 1213.389 | 1208.38          | 2      | 4.19  | 2.22        | GKDLAELIAAGR | LYK   | rep3      |
| 607.7156 | 1213.4156 | 1213.389 | 21.87            | 2      | 3.92  | 1.75        | GKDLAELIAAGR | LYT   | rep3      |

**Matching Genes:**

NP\_180339.1 (60S acidic ribosomal protein P2 (RPP2B) [Arabidopsis thaliana])

**Protein Group 338****Expression Quality:**

| Group                 | Group Probability | Num Peptides | % Seq Coverage | Num Spectra |
|-----------------------|-------------------|--------------|----------------|-------------|
| Total (Non-Redundant) | 1                 | 2            | 6.95           | 6.0         |

**Peptides:**

| Observed | Mr(expt)  | Mr(calc)  | Mass Error (ppm) | Charge | Score | Score Delta | Peptide     | Group | Replicate |
|----------|-----------|-----------|------------------|--------|-------|-------------|-------------|-------|-----------|
| 684.7163 | 1367.417  | 1366.4469 | 709.97           | 2      | 1.94  | 0.53        | FNNHHTVNDIR | LYK   | rep1      |
| 398.6086 | 1192.8023 | 1192.4429 | 301.41           | 3      | 2.24  | 0.6         | RAPVHVNLMR  | LYK   | rep1      |
| 398.4753 | 1192.4025 | 1192.4429 | 33.8             | 3      | 2.14  | 0.79        | RAPVHVNLMR  | LYT   | rep2      |

**Matching Genes:**

[NP\\_193946.1](#) (PUX3 (LANT UBX DOMAIN-CONTAINING PROTEIN 3) [Arabidopsis thaliana])

---

**Protein Group 339**

**Expression Quality:**

| Group                 | Group Probability | Num Peptides | % Seq Coverage | Num Spectra |
|-----------------------|-------------------|--------------|----------------|-------------|
| Total (Non-Redundant) | 1                 | 1            | 2.47           | 8.0         |

**Peptides:**

| Observed | Mr(expt)  | Mr(calc) | Mass Error (ppm) | Charge | Score | Score Delta | Peptide       | Group | Replicate |
|----------|-----------|----------|------------------|--------|-------|-------------|---------------|-------|-----------|
| 781.658  | 1561.3003 | 1561.811 | 326.99           | 2      | 4.16  | 2.5         | MHSSHLLLEEPIR | LYT   | rep1      |
| 521.6132 | 1561.816  | 1561.811 | 3.19             | 3      | 3.34  | 1.46        | MHSSHLLLEEPIR | LYK   | rep2      |

**Matching Genes:**

[NP\\_565850.1](#) (pyruvate kinase, putative [Arabidopsis thaliana])

---

**Protein Group 340**

**Expression Quality:**

| Group                 | Group Probability | Num Peptides | % Seq Coverage | Num Spectra |
|-----------------------|-------------------|--------------|----------------|-------------|
| Total (Non-Redundant) | 1                 | 1            | 6.59           | 11.0        |

**Peptides:**

| Observed | Mr(expt)  | Mr(calc)  | Mass Error (ppm) | Charge | Score | Score Delta | Peptide           | Group | Replicate |
|----------|-----------|-----------|------------------|--------|-------|-------------|-------------------|-------|-----------|
| 662.8531 | 1985.536  | 1986.1182 | 293.12           | 3      | 4.15  | 2.36        | FVLTTTHHWDHAGGNEK | LYK   | rep2      |
| 662.9208 | 1985.7389 | 1986.1182 | 190.98           | 3      | 3.6   | 1.47        | FVLTTTHHWDHAGGNEK | LYT   | rep3      |

**Matching Genes:**

[NP\\_187696.1](#) (GLX2-2 (GLYOXALASE 2-2); hydroxyacylglutathione hydrolase [Arabidopsis thaliana])

---

**Protein Group 341****Expression Quality:**

| Group                 | Group Probability | Num Peptides | % Seq Coverage | Num Spectra |
|-----------------------|-------------------|--------------|----------------|-------------|
| Total (Non-Redundant) | 1                 | 1            | 5.32           | 9.0         |

**Peptides:**

| Observed | Mr(expt)  | Mr(calc)  | Mass Error (ppm) | Charge | Score | Score Delta | Peptide                                             | Group | Replicate |
|----------|-----------|-----------|------------------|--------|-------|-------------|-----------------------------------------------------|-------|-----------|
| 616.025  | 1845.0516 | 1844.0902 | 521.31           | 3      | 4.11  | 2.29        | HLNFFAVSAAPCGHCR : +57.05000 (C12); +57.05000 (C15) | LYK   | rep1      |
| 616.0172 | 1845.0282 | 1844.0902 | 508.6            | 3      | 3.67  | 1.96        | HLNFFAVSAAPCGHCR : +57.05000 (C12); +57.05000 (C15) | LYT   | rep1      |

**Matching Genes:**

[NP\\_179547.1](#) (CDA1 (CYTIDINE DEAMINASE 1) [Arabidopsis thaliana])

---

**Protein Group 342****Expression Quality:**

| Group                 | Group Probability | Num Peptides | % Seq Coverage | Num Spectra |
|-----------------------|-------------------|--------------|----------------|-------------|
| Total (Non-Redundant) | 1                 | 1            | 6.42           | 7.0         |

**Peptides:**

| Observed | Mr(expt)  | Mr(calc)  | Mass Error (ppm) | Charge | Score | Score Delta | Peptide                        | Group | Replicate |
|----------|-----------|-----------|------------------|--------|-------|-------------|--------------------------------|-------|-----------|
| 520.4636 | 1558.3674 | 1558.7691 | 257.7            | 3      | 4.1   | 1.63        | HAFDWALVHFCR : +57.05000 (C11) | LYK   | rep2      |
| 520.7059 | 1559.0943 | 1558.7691 | 208.64           | 3      | 3.78  | 1.47        | HAFDWALVHFCR : +57.05000 (C11) | LYT   | rep3      |

**Matching Genes:**

[NP\\_850015.1](#) (RD2 (RESPONSIVE TO DESSICATION 2) [Arabidopsis thaliana])

---

**Protein Group 343**



**Expression Quality:**

| Group                 | Group Probability | Num Peptides | % Seq Coverage | Num Spectra |
|-----------------------|-------------------|--------------|----------------|-------------|
| Total (Non-Redundant) | 1                 | 1            | 6.12           | 13.0        |

**Peptides:**

| Observed  | Mr(expt)  | Mr(calc)  | Mass Error (ppm) | Charge | Score | Score Delta | Peptide              | Group | Replicate |
|-----------|-----------|-----------|------------------|--------|-------|-------------|----------------------|-------|-----------|
| 1038.2803 | 2074.545  | 2075.3413 | 383.71           | 2      | 4.06  | 2.62        | GDGGGRPHALPIFLFAQGHK | LYK   | rep1      |
| 693.0509  | 2076.1292 | 2075.3413 | 379.67           | 3      | 3.63  | 1.62        | GDGGGRPHALPIFLFAQGHK | LYT   | rep3      |

**Matching Genes:**

[NP\\_001078623.1](#) (meprin and TRAF homology domain-containing protein / MATH domain-containing protein [Arabidopsis thaliana])

**Protein Group 344****Expression Quality:**

| Group                 | Group Probability | Num Peptides | % Seq Coverage | Num Spectra |
|-----------------------|-------------------|--------------|----------------|-------------|
| Total (Non-Redundant) | 1                 | 1            | 8.61           | 3.0         |

**Peptides:**

| Observed | Mr(expt)  | Mr(calc)  | Mass Error (ppm) | Charge | Score | Score Delta | Peptide                                | Group | Replicate |
|----------|-----------|-----------|------------------|--------|-------|-------------|----------------------------------------|-------|-----------|
| 816.1753 | 2445.5024 | 2445.8673 | 149.19           | 3      | 4.05  | 2.3         | HGIICVEDLIHEIMTVGPHFK : +57.05000 (C5) | LYT   | rep3      |
| 816.649  | 2446.9237 | 2445.8673 | 431.89           | 3      | 2.19  | 0.68        | HGIICVEDLIHEIMTVGPHFK : +57.05000 (C5) | LYK   | rep2      |

**Matching Genes:**

[NP\\_187967.1](#) (60S ribosomal protein L7 (RPL7D) [Arabidopsis thaliana])

**Protein Group 345****Expression Quality:**

| Group | Group Probability | Num Peptides | % Seq Coverage | Num Spectra |
|-------|-------------------|--------------|----------------|-------------|
|-------|-------------------|--------------|----------------|-------------|

|                       |   |   |      |     |
|-----------------------|---|---|------|-----|
| Total (Non-Redundant) | 1 | 1 | 3.39 | 3.0 |
|-----------------------|---|---|------|-----|

**Peptides:**

| Observed | Mr(expt)  | Mr(calc)  | Mass Error (ppm) | Charge | Score | Score Delta | Peptide                         | Group | Replicate |
|----------|-----------|-----------|------------------|--------|-------|-------------|---------------------------------|-------|-----------|
| 905.7677 | 1809.5198 | 1810.0087 | 270.11           | 2      | 4.02  | 2.46        | CHISHEVNHLEGLK : +57.05000 (C1) | LYT   | rep2      |

**Matching Genes:**

[NP\\_001077698.1](#) (UBP6 (UBIQUITIN-SPECIFIC PROTEASE 6) [Arabidopsis thaliana])

**Protein Group 346**

**Expression Quality:**

| Group                 | Group Probability | Num Peptides | % Seq Coverage | Num Spectra |
|-----------------------|-------------------|--------------|----------------|-------------|
| Total (Non-Redundant) | 1                 | 2            | 8.36           | 4.0         |

**Peptides:**

| Observed | Mr(expt)  | Mr(calc)  | Mass Error (ppm) | Charge | Score | Score Delta | Peptide                          | Group | Replicate |
|----------|-----------|-----------|------------------|--------|-------|-------------|----------------------------------|-------|-----------|
| 791.574  | 1581.1324 | 1581.6632 | 335.65           | 2      | 2.34  | 0.88        | SLSENKDDLSDCAK : +57.05000 (C12) | LYT   | rep1      |
| 487.0735 | 1458.197  | 1457.5069 | 473.44           | 3      | 1.67  | 0.62        | YDAHFDYFHDK                      | LYK   | rep2      |
| 729.4446 | 1456.8736 | 1457.5069 | 434.56           | 2      | 1.08  | 0.17        | YDAHFDYFHDK                      | LYT   | rep3      |

**Matching Genes:**

[NP\\_566279.1](#) (AT-P4H-2 (A. THALIANA P4H ISOFORM 2); oxidoreductase, acting on paired donors, with incorporation or reduction of molecular oxygen, 2-oxoglutarate as one donor, and incorporation of one atom each of oxygen into both donors / procollagen-proline 4-dioxygenase [Arabidopsis thaliana])

**Protein Group 347**

**Expression Quality:**

| Group                 | Group Probability | Num Peptides | % Seq Coverage | Num Spectra |
|-----------------------|-------------------|--------------|----------------|-------------|
| Total (Non-Redundant) | 1                 | 1            | 6.28           | 8.0         |

**Peptides:**

| Observed | Mr(expt)  | Mr(calc)  | Mass Error (ppm) | Charge | Score | Score Delta | Peptide       | Group | Replicate |
|----------|-----------|-----------|------------------|--------|-------|-------------|---------------|-------|-----------|
| 508.2253 | 1521.6524 | 1521.7518 | 65.35            | 3      | 3.98  | 2.08        | MNTKPSHGPIHFR | LYK   | rep3      |
| 761.6465 | 1521.2774 | 1521.7518 | 311.77           | 2      | 2.94  | 1.49        | MNTKPSHGPIHFR | LYT   | rep1      |

**Matching Genes:**

NP\_001030654.1 (structural constituent of ribosome [Arabidopsis thaliana])

**Protein Group 348****Expression Quality:**

| Group                 | Group Probability | Num Peptides | % Seq Coverage | Num Spectra |
|-----------------------|-------------------|--------------|----------------|-------------|
| Total (Non-Redundant) | 1                 | 1            | 6.79           | 6.0         |

**Peptides:**

| Observed | Mr(expt)  | Mr(calc)  | Mass Error (ppm) | Charge | Score | Score Delta | Peptide                | Group | Replicate |
|----------|-----------|-----------|------------------|--------|-------|-------------|------------------------|-------|-----------|
| 864.3572 | 2590.0481 | 2590.8147 | 295.9            | 3      | 3.94  | 2.03        | NLTYILNTHHHYDHTGGNLELK | LYT   | rep3      |
| 864.4744 | 2590.3996 | 2590.8147 | 160.21           | 3      | 3.57  | 1.33        | NLTYILNTHHHYDHTGGNLELK | LYK   | rep2      |

**Matching Genes:**

[NP\\_180693.1](#) (GLX2-5 (GLYOXALASE 2-5); hydroxyacylglutathione hydrolase/ iron ion binding / zinc ion binding [Arabidopsis thaliana])

**Protein Group 349****Expression Quality:**

| Group                 | Group Probability | Num Peptides | % Seq Coverage | Num Spectra |
|-----------------------|-------------------|--------------|----------------|-------------|
| Total (Non-Redundant) | 1                 | 2            | 27.62          | 3.0         |

**Peptides:**

| Observed | Mr(expt) | Mr(calc) | Mass Error (ppm) | Charge | Score | Score Delta | Peptide | Group | Replicate |
|----------|----------|----------|------------------|--------|-------|-------------|---------|-------|-----------|
|----------|----------|----------|------------------|--------|-------|-------------|---------|-------|-----------|

|           |           |           |        |   |      |      |                                                 |     |      |
|-----------|-----------|-----------|--------|---|------|------|-------------------------------------------------|-----|------|
| 1125.4642 | 3373.3692 | 3372.6442 | 214.98 | 3 | 1.7  | 0.61 | HWYIQSTCATSGEGLYEGLDWLSNNIASKA : +57.05000 (C8) | LYT | rep1 |
| 809.3202  | 2424.9371 | 2424.5935 | 141.71 | 3 | 2.22 | 0.79 | HYFQNTQGLIFVVDNSNDRDR                           | LYT | rep2 |

**Matching Genes:**

[NP\\_172533.2](#) (ADP-ribosylation factor, putative [Arabidopsis thaliana])

**Protein Group 350**

**Expression Quality:**

| Group                 | Group Probability | Num Peptides | % Seq Coverage | Num Spectra |
|-----------------------|-------------------|--------------|----------------|-------------|
| Total (Non-Redundant) | 1                 | 1            | 2.71           | 6.0         |

**Peptides:**

| Observed | Mr(expt)  | Mr(calc) | Mass Error (ppm) | Charge | Score | Score Delta | Peptide         | Group | Replicate |
|----------|-----------|----------|------------------|--------|-------|-------------|-----------------|-------|-----------|
| 934.2565 | 1866.4973 | 1867.163 | 356.48           | 2      | 3.9   | 2.27        | DHFNHVILSVLGYPK | LYK   | rep2      |
| 934.4615 | 1866.9073 | 1867.163 | 136.94           | 2      | 3.89  | 2.03        | DHFNHVILSVLGYPK | LYT   | rep3      |

**Matching Genes:**

NP\_001031683.1 (translation initiation factor [Arabidopsis thaliana])

**Protein Group 351**

**Expression Quality:**

| Group                 | Group Probability | Num Peptides | % Seq Coverage | Num Spectra |
|-----------------------|-------------------|--------------|----------------|-------------|
| Total (Non-Redundant) | 1                 | 1            | 6.09           | 3.0         |

**Peptides:**

| Observed  | Mr(expt)  | Mr(calc)  | Mass Error (ppm) | Charge | Score | Score Delta | Peptide                           | Group | Replicate |
|-----------|-----------|-----------|------------------|--------|-------|-------------|-----------------------------------|-------|-----------|
| 1146.0448 | 3435.1109 | 3436.7624 | 480.54           | 3      | 3.9   | 2.13        | NFAYSHLHPAGGVYDAHPKPVGIGFGGTLGNER | LYK   | rep1      |
| 1146.3143 | 3435.9195 | 3436.7624 | 245.27           | 3      | 3.76  | 1.84        | NFAYSHLHPAGGVYDAHPKPVGIGFGGTLGNER | LYT   | rep3      |

**Matching Genes:**

[NP\\_198775.1](#) (unknown protein [Arabidopsis thaliana])

---

**Protein Group 352****Expression Quality:**

| Group                 | Group Probability | Num Peptides | % Seq Coverage | Num Spectra |
|-----------------------|-------------------|--------------|----------------|-------------|
| Total (Non-Redundant) | 1                 | 1            | 5.25           | 6.0         |

**Peptides:**

| Observed | Mr(expt)  | Mr(calc)  | Mass Error (ppm) | Charge | Score | Score Delta | Peptide           | Group | Replicate |
|----------|-----------|-----------|------------------|--------|-------|-------------|-------------------|-------|-----------|
| 579.724  | 1736.1485 | 1735.8883 | 149.91           | 3      | 3.88  | 2.61        | HGFSGMPASHGASLSHR | LYT   | rep3      |
| 580.139  | 1737.3936 | 1735.8883 | 867.19           | 3      | 3.62  | 2.27        | HGFSGMPASHGASLSHR | LYK   | rep2      |

**Matching Genes:**

[NP\\_566579.1](#) (RPL3P (ribosomal protein large subunit 3P); structural constituent of ribosome [Arabidopsis thaliana])

---

**Protein Group 353****Expression Quality:**

| Group                 | Group Probability | Num Peptides | % Seq Coverage | Num Spectra |
|-----------------------|-------------------|--------------|----------------|-------------|
| Total (Non-Redundant) | 1                 | 2            | 4.36           | 3.0         |

**Peptides:**

| Observed | Mr(expt)  | Mr(calc)  | Mass Error (ppm) | Charge | Score | Score Delta | Peptide                     | Group | Replicate |
|----------|-----------|-----------|------------------|--------|-------|-------------|-----------------------------|-------|-----------|
| 673.8016 | 2018.3814 | 2018.3613 | 9.97             | 3      | 1.88  | 0.51        | LAEPICYVVPKEDILYAVK         | LYK   | rep1      |
| 460.6832 | 1379.026  | 1378.6011 | 308.24           | 3      | 1.99  | 0.53        | VCEPLFYHWK : +57.05000 (C2) | LYT   | rep3      |

**Matching Genes:**

[NP\\_196079.1](#) (SIR (sulfite reductase); sulfite reductase (ferredoxin) [Arabidopsis])

thaliana])

---

### Protein Group 354

#### Expression Quality:

| Group                 | Group Probability | Num Peptides | % Seq Coverage | Num Spectra |
|-----------------------|-------------------|--------------|----------------|-------------|
| Total (Non-Redundant) | 1                 | 1            | 4.7            | 9.0         |

#### Peptides:

| Observed | Mr(expt)  | Mr(calc) | Mass Error (ppm) | Charge | Score | Score Delta | Peptide         | Group | Replicate |
|----------|-----------|----------|------------------|--------|-------|-------------|-----------------|-------|-----------|
| 603.4414 | 1807.3007 | 1807.026 | 152.05           | 3      | 3.85  | 1.66        | KQHSFIQPSLIEHSR | LYK   | rep1      |
| 603.3116 | 1806.9115 | 1807.026 | 63.38            | 3      | 3.06  | 1.08        | KQHSFIQPSLIEHSR | LYT   | rep2      |

#### Matching Genes:

NP\_197178.1 (inositol 1,3,4-trisphosphate 5/6-kinase [Arabidopsis thaliana])

---

### Protein Group 355

#### Expression Quality:

| Group                 | Group Probability | Num Peptides | % Seq Coverage | Num Spectra |
|-----------------------|-------------------|--------------|----------------|-------------|
| Total (Non-Redundant) | 1                 | 1            | 2.58           | 7.0         |

#### Peptides:

| Observed | Mr(expt)  | Mr(calc)  | Mass Error (ppm) | Charge | Score | Score Delta | Peptide              | Group | Replicate |
|----------|-----------|-----------|------------------|--------|-------|-------------|----------------------|-------|-----------|
| 757.1205 | 2268.338  | 2268.6477 | 136.52           | 3      | 3.84  | 2.05        | NKPIILSHHMLPGLQQGQEK | LYT   | rep3      |
| 757.5726 | 2269.6944 | 2268.6477 | 461.39           | 3      | 3.46  | 1.63        | NKPIILSHHMLPGLQQGQEK | LYK   | rep2      |

#### Matching Genes:

[NP\\_174157.3](#) (ATP binding / aminoacyl-tRNA ligase [Arabidopsis thaliana])

---

**Protein Group 356****Expression Quality:**

| Group                 | Group Probability | Num Peptides | % Seq Coverage | Num Spectra |
|-----------------------|-------------------|--------------|----------------|-------------|
| Total (Non-Redundant) | 1                 | 1            | 5.32           | 11.0        |

**Peptides:**

| Observed | Mr(expt)  | Mr(calc)  | Mass Error (ppm) | Charge | Score | Score Delta | Peptide        | Group | Replicate |
|----------|-----------|-----------|------------------|--------|-------|-------------|----------------|-------|-----------|
| 764.1595 | 1526.3033 | 1526.7018 | 261.03           | 2      | 3.8   | 1.87        | ISSATAFTHVLHSR | LYT   | rep1      |
| 764.0989 | 1526.1822 | 1526.7018 | 340.35           | 2      | 3.56  | 1.8         | ISSATAFTHVLHSR | LYK   | rep3      |

**Matching Genes:**

NP\_180725.1 (unknown protein [Arabidopsis thaliana])

---

**Protein Group 357****Expression Quality:**

| Group                 | Group Probability | Num Peptides | % Seq Coverage | Num Spectra |
|-----------------------|-------------------|--------------|----------------|-------------|
| Total (Non-Redundant) | 1                 | 1            | 5.16           | 5.0         |

**Peptides:**

| Observed  | Mr(expt)  | Mr(calc)  | Mass Error (ppm) | Charge | Score | Score Delta | Peptide                       | Group | Replicate |
|-----------|-----------|-----------|------------------|--------|-------|-------------|-------------------------------|-------|-----------|
| 1042.6793 | 3125.0145 | 3124.6272 | 123.95           | 3      | 3.79  | 1.52        | MGSYLAVAAASANPPHFIHLIYKSSGPVK | LYT   | rep3      |
| 1042.0433 | 3123.1065 | 3124.6272 | 486.67           | 3      | 3.47  | 1.32        | MGSYLAVAAASANPPHFIHLIYKSSGPVK | LYK   | rep3      |

**Matching Genes:**

[NP\\_194820.1](#) (cytosol aminopeptidase family protein [Arabidopsis thaliana])

---

**Protein Group 358**

**Expression Quality:**

| Group                 | Group Probability | Num Peptides | % Seq Coverage | Num Spectra |
|-----------------------|-------------------|--------------|----------------|-------------|
| Total (Non-Redundant) | 1                 | 1            | 9.63           | 14.0        |

**Peptides:**

| Observed | Mr(expt)  | Mr(calc)  | Mass Error (ppm) | Charge | Score | Score Delta | Peptide            | Group | Replicate |
|----------|-----------|-----------|------------------|--------|-------|-------------|--------------------|-------|-----------|
| 981.2113 | 1960.407  | 1961.1949 | 401.75           | 2      | 3.77  | 2.09        | HFGPAPGVPHSNTKPYVR | LYK   | rep3      |
| 981.8061 | 1961.5965 | 1961.1949 | 204.74           | 2      | 3.17  | 1.6         | HFGPAPGVPHSNTKPYVR | LYT   | rep1      |

**Matching Genes:**

[NP\\_198137.1](#) (60S ribosomal protein L18 (RPL18C) [Arabidopsis thaliana])

---

**Protein Group 359****Expression Quality:**

| Group                 | Group Probability | Num Peptides | % Seq Coverage | Num Spectra |
|-----------------------|-------------------|--------------|----------------|-------------|
| Total (Non-Redundant) | 1                 | 1            | 5.54           | 4.0         |

**Peptides:**

| Observed | Mr(expt)  | Mr(calc) | Mass Error (ppm) | Charge | Score | Score Delta | Peptide                            | Group | Replicate |
|----------|-----------|----------|------------------|--------|-------|-------------|------------------------------------|-------|-----------|
| 986.9436 | 1971.8716 | 1972.238 | 185.76           | 2      | 3.76  | 2.05        | VSHYPPCPHPELVNGLR : +57.05000 (C7) | LYK   | rep3      |
| 658.4224 | 1972.2436 | 1972.238 | 2.86             | 3      | 1.37  | 0.06        | VSHYPPCPHPELVNGLR : +57.05000 (C7) | LYT   | rep3      |

**Matching Genes:**

[NP\\_565154.1](#) (1-aminocyclopropane-1-carboxylate oxidase, putative / ACC oxidase, putative [Arabidopsis thaliana])

---

**Protein Group 360****Expression Quality:**



| Group                 | Group Probability | Num Peptides | % Seq Coverage | Num Spectra |
|-----------------------|-------------------|--------------|----------------|-------------|
| Total (Non-Redundant) | 1                 | 1            | 4.42           | 5.0         |

**Peptides:**

| Observed | Mr(expt)  | Mr(calc)  | Mass Error (ppm) | Charge | Score | Score Delta | Peptide              | Group | Replicate |
|----------|-----------|-----------|------------------|--------|-------|-------------|----------------------|-------|-----------|
| 647.8561 | 1940.5448 | 1940.1161 | 220.96           | 3      | 3.74  | 1.55        | HASPMHLISPSHGGNGGGAR | LYK   | rep2      |
| 647.775  | 1940.3016 | 1940.1161 | 95.62            | 3      | 3.36  | 0.87        | HASPMHLISPSHGGNGGGAR | LYT   | rep3      |

**Matching Genes:**

[NP\\_001031725.1](#) (RNA binding [Arabidopsis thaliana])

**Protein Group 361**

**Expression Quality:**

| Group                 | Group Probability | Num Peptides | % Seq Coverage | Num Spectra |
|-----------------------|-------------------|--------------|----------------|-------------|
| Total (Non-Redundant) | 1                 | 1            | 17.73          | 4.0         |

**Peptides:**

| Observed  | Mr(expt)  | Mr(calc)  | Mass Error (ppm) | Charge | Score | Score Delta | Peptide                              | Group | Replicate |
|-----------|-----------|-----------|------------------|--------|-------|-------------|--------------------------------------|-------|-----------|
| 1300.7689 | 3899.2833 | 3900.3669 | 277.83           | 3      | 3.74  | 1.82        | YFLSSGFAFLHANSVADIIAVEAVPLDHIDPSQVQK | LYK   | rep1      |
| 1300.7216 | 3899.1412 | 3900.3669 | 314.26           | 3      | 3.34  | 1.52        | YFLSSGFAFLHANSVADIIAVEAVPLDHIDPSQVQK | LYT   | rep1      |

**Matching Genes:**

[NP\\_199514.1](#) (ATP synthase delta' chain, mitochondrial [Arabidopsis thaliana])

**Protein Group 362**

**Expression Quality:**

| Group                 | Group Probability | Num Peptides | % Seq Coverage | Num Spectra |
|-----------------------|-------------------|--------------|----------------|-------------|
| Total (Non-Redundant) | 1                 | 1            | 8.99           | 3.0         |

**Peptides:**

| Observed  | Mr(expt)  | Mr(calc)  | Mass Error (ppm) | Charge | Score | Score Delta | Peptide                                                                | Group | Replicate |
|-----------|-----------|-----------|------------------|--------|-------|-------------|------------------------------------------------------------------------|-------|-----------|
| 1318.3954 | 3952.1627 | 3953.5784 | 358.09           | 3      | 3.73  | 1.74        | VLVLDGVIQLTERDECA YQEMITHLPLCSIPNPK : +57.05000 (C16); +57.05000 (C28) | LYK   | rep1      |
| 1318.9308 | 3953.7689 | 3953.5784 | 48.18            | 3      | 3.58  | 1.96        | VLVLDGVIQLTERDECA YQEMITHLPLCSIPNPK : +57.05000 (C16); +57.05000 (C28) | LYT   | rep3      |

**Matching Genes:**

[NP\\_173794.2](#) (SPDS1 (SPERMIDINE SYNTHASE 1) [Arabidopsis thaliana])

**Protein Group 363****Expression Quality:**

| Group                 | Group Probability | Num Peptides | % Seq Coverage | Num Spectra |
|-----------------------|-------------------|--------------|----------------|-------------|
| Total (Non-Redundant) | 1                 | 1            | 5.41           | 3.0         |

**Peptides:**

| Observed | Mr(expt)  | Mr(calc)  | Mass Error (ppm) | Charge | Score | Score Delta | Peptide                  | Group | Replicate |
|----------|-----------|-----------|------------------|--------|-------|-------------|--------------------------|-------|-----------|
| 766.1737 | 2295.4976 | 2295.4822 | 6.74             | 3      | 3.69  | 1.9         | FGGSGARP NLPWVSTTGSGPHGR | LYT   | rep3      |
| 765.8201 | 2294.4367 | 2295.4822 | 455.43           | 3      | 2.16  | 0.37        | FGGSGARP NLPWVSTTGSGPHGR | LYK   | rep2      |

**Matching Genes:**

[NP\\_001078466.1](#) (unknown protein [Arabidopsis thaliana])

**Protein Group 364****Expression Quality:**

| Group | Group Probability | Num Peptides | % Seq Coverage | Num Spectra |
|-------|-------------------|--------------|----------------|-------------|
|-------|-------------------|--------------|----------------|-------------|

|                       |   |   |       |     |
|-----------------------|---|---|-------|-----|
| Total (Non-Redundant) | 1 | 1 | 11.94 | 4.0 |
|-----------------------|---|---|-------|-----|

**Peptides:**

| Observed | Mr(expt)  | Mr(calc)  | Mass Error (ppm) | Charge | Score | Score Delta | Peptide                                    | Group | Replicate |
|----------|-----------|-----------|------------------|--------|-------|-------------|--------------------------------------------|-------|-----------|
| 879.2615 | 2634.7609 | 2636.0434 | 486.5            | 3      | 3.69  | 1.94        | KVVIFGLPGAYTGVCSQQHVPSYK : +57.05000 (C15) | LYK   | rep3      |
| 879.7493 | 2636.2243 | 2636.0434 | 68.64            | 3      | 3.49  | 2.14        | KVVIFGLPGAYTGVCSQQHVPSYK : +57.05000 (C15) | LYT   | rep3      |

**Matching Genes:**

NP\_566268.1 (ATPRXIIF/PRXIIF (PEROXIREDOXIN IIF); antioxidant/ peroxidase [Arabidopsis thaliana])

**Protein Group 365**

**Expression Quality:**

| Group                 | Group Probability | Num Peptides | % Seq Coverage | Num Spectra |
|-----------------------|-------------------|--------------|----------------|-------------|
| Total (Non-Redundant) | 1                 | 1            | 6.79           | 5.0         |

**Peptides:**

| Observed | Mr(expt)  | Mr(calc)  | Mass Error (ppm) | Charge | Score | Score Delta | Peptide              | Group | Replicate |
|----------|-----------|-----------|------------------|--------|-------|-------------|----------------------|-------|-----------|
| 968.6794 | 2903.0149 | 2901.1299 | 649.74           | 3      | 3.64  | 2.04        | DFQLHLQQQQEFLHHHQQQR | LYT   | rep3      |
| 967.7786 | 2900.3122 | 2901.1299 | 281.84           | 3      | 3.56  | 1.97        | DFQLHLQQQQEFLHHHQQQR | LYK   | rep1      |

**Matching Genes:**

[NP\\_194012.1](#) (DNA-binding protein-related [Arabidopsis thaliana])

**Protein Group 366**

**Expression Quality:**

| Group                 | Group Probability | Num Peptides | % Seq Coverage | Num Spectra |
|-----------------------|-------------------|--------------|----------------|-------------|
| Total (Non-Redundant) | 1                 | 1            | 8.88           | 5.0         |

**Peptides:**

| Observed | Mr(expt)  | Mr(calc)  | Mass Error (ppm) | Charge | Score | Score Delta | Peptide                 | Group | Replicate |
|----------|-----------|-----------|------------------|--------|-------|-------------|-------------------------|-------|-----------|
| 838.5886 | 2512.7424 | 2512.8332 | 36.15            | 3      | 3.64  | 1.83        | QTTSNLGHLNKPSIQALIHGLNR | LYT   | rep3      |
| 838.5411 | 2512.5999 | 2512.8332 | 92.84            | 3      | 3.48  | 1.57        | QTTSNLGHLNKPSIQALIHGLNR | LYK   | rep2      |

**Matching Genes:**

[NP\\_001078617.1](#) (26S proteasome regulatory subunit, putative [Arabidopsis thaliana])

**Protein Group 367**

**Expression Quality:**

| Group                 | Group Probability | Num Peptides | % Seq Coverage | Num Spectra |
|-----------------------|-------------------|--------------|----------------|-------------|
| Total (Non-Redundant) | 1                 | 1            | 5.11           | 5.0         |

**Peptides:**

| Observed | Mr(expt)  | Mr(calc)  | Mass Error (ppm) | Charge | Score | Score Delta | Peptide          | Group | Replicate |
|----------|-----------|-----------|------------------|--------|-------|-------------|------------------|-------|-----------|
| 916.6103 | 1831.2049 | 1831.9012 | 380.13           | 2      | 3.6   | 2.28        | LHSELHAEDGNEVEPR | LYK   | rep2      |
| 916.5365 | 1831.0574 | 1831.9012 | 460.63           | 2      | 3.32  | 1.98        | LHSELHAEDGNEVEPR | LYT   | rep3      |

**Matching Genes:**

[NP\\_196063.1](#) (KH domain-containing protein NOVA, putative [Arabidopsis thaliana])

**Protein Group 368**

**Expression Quality:**

| Group                 | Group Probability | Num Peptides | % Seq Coverage | Num Spectra |
|-----------------------|-------------------|--------------|----------------|-------------|
| Total (Non-Redundant) | 1                 | 1            | 8.12           | 17.0        |

**Peptides:**

| Observed | Mr(expt)  | Mr(calc)  | Mass Error (ppm) | Charge | Score | Score Delta | Peptide                         | Group | Replicate |
|----------|-----------|-----------|------------------|--------|-------|-------------|---------------------------------|-------|-----------|
| 508.0623 | 1521.1633 | 1521.7072 | 357.41           | 3      | 3.51  | 1.28        | HSNIPAHVSPCFR : +57.05000 (C11) | LYK   | rep3      |

|          |           |           |        |   |      |      |                                 |     |      |
|----------|-----------|-----------|--------|---|------|------|---------------------------------|-----|------|
| 761.5935 | 1521.1714 | 1521.7072 | 352.06 | 2 | 3.07 | 1.46 | HSNIPAHVSPCFR : +57.05000 (C11) | LYT | rep1 |
|----------|-----------|-----------|--------|---|------|------|---------------------------------|-----|------|

**Matching Genes:**

[NP\\_190462.1](#) (EMB1080 (EMBRYO DEFECTIVE 1080); structural constituent of ribosome [Arabidopsis thaliana])

**Protein Group 369**

**Expression Quality:**

| Group                 | Group Probability | Num Peptides | % Seq Coverage | Num Spectra |
|-----------------------|-------------------|--------------|----------------|-------------|
| Total (Non-Redundant) | 1                 | 1            | 11.28          | 5.0         |

**Peptides:**

| Observed | Mr(expt)  | Mr(calc)  | Mass Error (ppm) | Charge | Score | Score Delta | Peptide                                          | Group | Replicate |
|----------|-----------|-----------|------------------|--------|-------|-------------|--------------------------------------------------|-------|-----------|
| 909.0999 | 1816.1841 | 1817.0631 | 483.74           | 2      | 3.46  | 1.65        | TQYCVSCAIHSHVVR : +57.05000 (C4); +57.05000 (C7) | LYK   | rep1      |
| 607.1588 | 1818.453  | 1817.0631 | 764.89           | 3      | 2.74  | 1.15        | TQYCVSCAIHSHVVR : +57.05000 (C4); +57.05000 (C7) | LYT   | rep3      |

**Matching Genes:**

[NP\\_181583.1](#) (40S ribosomal protein S26 (RPS26A) [Arabidopsis thaliana])

**Protein Group 370**

**Expression Quality:**

| Group                 | Group Probability | Num Peptides | % Seq Coverage | Num Spectra |
|-----------------------|-------------------|--------------|----------------|-------------|
| Total (Non-Redundant) | 1                 | 1            | 10.84          | 7.0         |

**Peptides:**

| Observed | Mr(expt)  | Mr(calc)  | Mass Error (ppm) | Charge | Score | Score Delta | Peptide                 | Group | Replicate |
|----------|-----------|-----------|------------------|--------|-------|-------------|-------------------------|-------|-----------|
| 794.6473 | 2380.9185 | 2380.5342 | 161.46           | 3      | 3.44  | 1.39        | GFGFITPDDGGDDLFLVHQSSIR | LYK   | rep3      |
| 795.2207 | 2382.6386 | 2380.5342 | 884.03           | 3      | 3.22  | 1.22        | GFGFITPDDGGDDLFLVHQSSIR | LYT   | rep3      |

**Matching Genes:**

[NP\\_195580.1](#) (GRP2 (COLD SHOCK DOMAIN PROTEIN 2); nucleic acid binding [Arabidopsis thaliana])

---

**Protein Group 371****Expression Quality:**

| Group                 | Group Probability | Num Peptides | % Seq Coverage | Num Spectra |
|-----------------------|-------------------|--------------|----------------|-------------|
| Total (Non-Redundant) | 1                 | 1            | 2.46           | 5.0         |

**Peptides:**

| Observed | Mr(expt)  | Mr(calc)  | Mass Error (ppm) | Charge | Score | Score Delta | Peptide            | Group | Replicate |
|----------|-----------|-----------|------------------|--------|-------|-------------|--------------------|-------|-----------|
| 644.3013 | 1929.8803 | 1930.1792 | 154.83           | 3      | 3.44  | 1.54        | SPRPDVAFTHHLPASGLK | LYK   | rep2      |
| 644.2777 | 1929.8097 | 1930.1792 | 191.45           | 3      | 2.27  | 0.82        | SPRPDVAFTHHLPASGLK | LYT   | rep1      |

**Matching Genes:**

[NP\\_001032101.1](#) (subtilase [Arabidopsis thaliana])

---

**Protein Group 372****Expression Quality:**

| Group                 | Group Probability | Num Peptides | % Seq Coverage | Num Spectra |
|-----------------------|-------------------|--------------|----------------|-------------|
| Total (Non-Redundant) | 1                 | 1            | 4              | 11.0        |

**Peptides:**

| Observed | Mr(expt)  | Mr(calc)  | Mass Error (ppm) | Charge | Score | Score Delta | Peptide      | Group | Replicate |
|----------|-----------|-----------|------------------|--------|-------|-------------|--------------|-------|-----------|
| 516.2657 | 1545.7738 | 1545.8564 | 53.48            | 3      | 3.43  | 1.81        | HLRPEMALFYLR | LYT   | rep3      |
| 516.7618 | 1547.262  | 1545.8564 | 909.28           | 3      | 3.43  | 1.58        | HLRPEMALFYLR | LYK   | rep1      |

**Matching Genes:**

[NP\\_001031879.1](#) (3-isopropylmalate dehydrogenase [Arabidopsis thaliana])

---

**Protein Group 373****Expression Quality:**

| Group                 | Group Probability | Num Peptides | % Seq Coverage | Num Spectra |
|-----------------------|-------------------|--------------|----------------|-------------|
| Total (Non-Redundant) | 0.99              | 1            | 8.88           | 3.0         |

**Peptides:**

| Observed  | Mr(expt)  | Mr(calc)  | Mass Error (ppm) | Charge | Score | Score Delta | Peptide                               | Group | Replicate |
|-----------|-----------|-----------|------------------|--------|-------|-------------|---------------------------------------|-------|-----------|
| 758.6908  | 2273.0489 | 2272.3892 | 290.32           | 3      | 3.4   | 0.87        | EVERLLDMVDSSENSDCEEK : +32.00000 (M8) | LYK   | rep3      |
| 1137.7605 | 2273.5054 | 2272.3892 | 491.21           | 2      | 1.51  | 0.11        | EVERLLDMVDSSENSDCEEK : +32.00000 (M8) | LYT   | rep1      |

**Matching Genes:**

[NP\\_178212.2](#) (XH domain-containing protein [Arabidopsis thaliana])

---

**Protein Group 374****Expression Quality:**

| Group                 | Group Probability | Num Peptides | % Seq Coverage | Num Spectra |
|-----------------------|-------------------|--------------|----------------|-------------|
| Total (Non-Redundant) | 1                 | 1            | 3.75           | 7.0         |

**Peptides:**

| Observed | Mr(expt)  | Mr(calc)  | Mass Error (ppm) | Charge | Score | Score Delta | Peptide                             | Group | Replicate |
|----------|-----------|-----------|------------------|--------|-------|-------------|-------------------------------------|-------|-----------|
| 997.487  | 1992.9583 | 1994.2851 | 665.3            | 2      | 3.36  | 1.8         | CYTGLTSAHAALLTHHLK : +57.05000 (C1) | LYT   | rep3      |
| 665.7509 | 1994.2291 | 1994.2851 | 28.08            | 3      | 2.08  | 0.38        | CYTGLTSAHAALLTHHLK : +57.05000 (C1) | LYK   | rep1      |

**Matching Genes:**

[NP\\_188431.3](#) (HON4; DNA binding [Arabidopsis thaliana])

---

**Protein Group 375****Expression Quality:**

| Group                 | Group Probability | Num Peptides | % Seq Coverage | Num Spectra |
|-----------------------|-------------------|--------------|----------------|-------------|
| Total (Non-Redundant) | 1                 | 1            | 14.04          | 10.0        |

**Peptides:**

| Observed | Mr(expt)  | Mr(calc)  | Mass Error (ppm) | Charge | Score | Score Delta | Peptide                                                     | Group | Replicate |
|----------|-----------|-----------|------------------|--------|-------|-------------|-------------------------------------------------------------|-------|-----------|
| 925.22   | 2772.6364 | 2773.2702 | 228.52           | 3      | 3.35  | 1.57        | MFLGSVSNYCTNHAHCPVVIKPK : +57.05000 (C10); +57.05000 (C 16) | LYT   | rep1      |
| 924.9374 | 2771.7887 | 2773.2702 | 534.21           | 3      | 3.29  | 1.21        | MFLGSVSNYCTNHAHCPVVIKPK : +57.05000 (C10); +57.05000 (C16)  | LYK   | rep3      |

**Matching Genes:**

[NP\\_172445.2](#) (ethylene-responsive protein, putative [Arabidopsis thaliana])

---

**Protein Group 376****Expression Quality:**

| Group                 | Group Probability | Num Peptides | % Seq Coverage | Num Spectra |
|-----------------------|-------------------|--------------|----------------|-------------|
| Total (Non-Redundant) | 1                 | 1            | 8.79           | 5.0         |

**Peptides:**

| Observed | Mr(expt)  | Mr(calc)  | Mass Error (ppm) | Charge | Score | Score Delta | Peptide                                      | Group | Replicate |
|----------|-----------|-----------|------------------|--------|-------|-------------|----------------------------------------------|-------|-----------|
| 982.6873 | 2945.0383 | 2946.4019 | 462.8            | 3      | 3.35  | 1.81        | IKPISGGIPHCFPQFGPGLIQHGFGR : +57.05000 (C11) | LYK   | rep3      |
| 983.46   | 2947.3564 | 2946.4019 | 323.96           | 3      | 2.56  | 1.16        | IKPISGGIPHCFPQFGPGLIQHGFGR : +57.05000 (C11) | LYT   | rep3      |

**Matching Genes:**

NP\_201454.1 (aldose 1-epimerase family protein [Arabidopsis thaliana])

---

**Protein Group 377**



**Expression Quality:**

| Group                 | Group Probability | Num Peptides | % Seq Coverage | Num Spectra |
|-----------------------|-------------------|--------------|----------------|-------------|
| Total (Non-Redundant) | 1                 | 1            | 19.5           | 4.0         |

**Peptides:**

| Observed  | Mr(expt)  | Mr(calc)  | Mass Error (ppm) | Charge | Score | Score Delta | Peptide                          | Group | Replicate |
|-----------|-----------|-----------|------------------|--------|-------|-------------|----------------------------------|-------|-----------|
| 1197.6981 | 3590.0709 | 3590.9663 | 249.35           | 3      | 3.35  | 1.85        | YNASQVPAEWHGWLHFITDHTGDELLESLKPK | LYT   | rep3      |
| 1197.6088 | 3589.8028 | 3590.9663 | 324              | 3      | 3.33  | 1.54        | YNASQVPAEWHGWLHFITDHTGDELLESLKPK | LYK   | rep2      |

**Matching Genes:**

[NP\\_001030628.1](#) (oxidoreductase [Arabidopsis thaliana])

**Protein Group 378****Expression Quality:**

| Group                 | Group Probability | Num Peptides | % Seq Coverage | Num Spectra |
|-----------------------|-------------------|--------------|----------------|-------------|
| Total (Non-Redundant) | 1                 | 1            | 3.02           | 10.0        |

**Peptides:**

| Observed | Mr(expt)  | Mr(calc)  | Mass Error (ppm) | Charge | Score | Score Delta | Peptide    | Group | Replicate |
|----------|-----------|-----------|------------------|--------|-------|-------------|------------|-------|-----------|
| 401.9922 | 1202.9533 | 1202.3297 | 518.63           | 3      | 3.34  | 1.46        | RPHVGFYGNR | LYT   | rep2      |
| 402.0425 | 1203.1041 | 1202.3297 | 644.12           | 3      | 3.01  | 1.39        | RPHVGFYGNR | LYK   | rep1      |

**Matching Genes:**

[NP\\_201215.1](#) (peroxidase, putative [Arabidopsis thaliana])

**Protein Group 379****Expression Quality:**

| Group                 | Group Probability | Num Peptides | % Seq Coverage | Num Spectra |
|-----------------------|-------------------|--------------|----------------|-------------|
| Total (Non-Redundant) | 1                 | 1            | 2.56           | 6.0         |

**Peptides:**

| Observed | Mr(expt)  | Mr(calc)  | Mass Error (ppm) | Charge | Score | Score Delta | Peptide           | Group | Replicate |
|----------|-----------|-----------|------------------|--------|-------|-------------|-------------------|-------|-----------|
| 597.7726 | 1790.2943 | 1789.9986 | 165.16           | 3      | 3.32  | 1.37        | ALNREPAGHAFHSAALK | LYT   | rep2      |
| 598.0631 | 1791.1659 | 1789.9986 | 652.07           | 3      | 2.72  | 1.14        | ALNREPAGHAFHSAALK | LYK   | rep2      |

**Matching Genes:**

[NP\\_187752.1](#) (DNAJ heat shock N-terminal domain-containing protein / cell division protein-related [Arabidopsis thaliana])

**Protein Group 380**

**Expression Quality:**

| Group                 | Group Probability | Num Peptides | % Seq Coverage | Num Spectra |
|-----------------------|-------------------|--------------|----------------|-------------|
| Total (Non-Redundant) | 1                 | 1            | 5.73           | 3.0         |

**Peptides:**

| Observed | Mr(expt)  | Mr(calc)  | Mass Error (ppm) | Charge | Score | Score Delta | Peptide                | Group | Replicate |
|----------|-----------|-----------|------------------|--------|-------|-------------|------------------------|-------|-----------|
| 838.9633 | 2513.8663 | 2513.8579 | 3.34             | 3      | 3.31  | 1.25        | HIPDLHVLISTPFHPAYVTAER | LYK   | rep1      |
| 839.2948 | 2514.8609 | 2513.8579 | 399              | 3      | 2.86  | 1.34        | HIPDLHVLISTPFHPAYVTAER | LYT   | rep2      |

**Matching Genes:**

[NP\\_196982.1](#) (FDH (FORMATE DEHYDROGENASE); NAD binding / cofactor binding / oxidoreductase, acting on the CH-OH group of donors, NAD or NADP as acceptor [Arabidopsis thaliana])

**Protein Group 381**

**Expression Quality:**

| Group | Group Probability | Num Peptides | % Seq Coverage | Num Spectra |
|-------|-------------------|--------------|----------------|-------------|
|-------|-------------------|--------------|----------------|-------------|

|                       |   |   |      |     |
|-----------------------|---|---|------|-----|
| Total (Non-Redundant) | 1 | 1 | 1.72 | 3.0 |
|-----------------------|---|---|------|-----|

**Peptides:**

| Observed | Mr(expt)  | Mr(calc)  | Mass Error (ppm) | Charge | Score | Score Delta | Peptide       | Group | Replicate |
|----------|-----------|-----------|------------------|--------|-------|-------------|---------------|-------|-----------|
| 525.3734 | 1573.0968 | 1572.8168 | 178.03           | 3      | 3.3   | 1.44        | KIHVHNEQVSLIR | LYT   | rep3      |
| 787.1741 | 1572.3326 | 1572.8168 | 307.86           | 2      | 3.05  | 1.16        | KIHVHNEQVSLIR | LYK   | rep1      |

**Matching Genes:**

NP\_001032163.1 (unknown protein [Arabidopsis thaliana])

**Protein Group 382**

**Expression Quality:**

| Group                 | Group Probability | Num Peptides | % Seq Coverage | Num Spectra |
|-----------------------|-------------------|--------------|----------------|-------------|
| Total (Non-Redundant) | 1                 | 1            | 5.18           | 3.0         |

**Peptides:**

| Observed | Mr(expt)  | Mr(calc)  | Mass Error (ppm) | Charge | Score | Score Delta | Peptide           | Group | Replicate |
|----------|-----------|-----------|------------------|--------|-------|-------------|-------------------|-------|-----------|
| 943.6121 | 1885.2085 | 1886.1848 | 517.59           | 2      | 3.3   | 1.67        | MSQHFASLKPGDVLEVK | LYK   | rep3      |
| 629.4413 | 1885.3004 | 1886.1848 | 468.9            | 3      | 2.45  | 0.43        | MSQHFASLKPGDVLEVK | LYT   | rep1      |

**Matching Genes:**

[NP\\_568391.1](#) (NADH-cytochrome b5 reductase, putative [Arabidopsis thaliana])

**Protein Group 383**

**Expression Quality:**

| Group                 | Group Probability | Num Peptides | % Seq Coverage | Num Spectra |
|-----------------------|-------------------|--------------|----------------|-------------|
| Total (Non-Redundant) | 1                 | 1            | 9.63           | 8.0         |

**Peptides:**

| Observed | Mr(expt)  | Mr(calc)  | Mass Error (ppm) | Charge | Score | Score Delta | Peptide            | Group | Replicate |
|----------|-----------|-----------|------------------|--------|-------|-------------|--------------------|-------|-----------|
| 657.6339 | 1969.8783 | 1970.2051 | 165.88           | 3      | 3.29  | 1.75        | HFGPAPGVPHSHSKPYVR | LYK   | rep3      |
| 657.9666 | 1970.8762 | 1970.2051 | 340.63           | 3      | 3.1   | 1.51        | HFGPAPGVPHSHSKPYVR | LYT   | rep3      |

**Matching Genes:**

[NP\\_187210.1](#) (RPL18 (RIBOSOMAL PROTEIN L18); structural constituent of ribosome [Arabidopsis thaliana])

**Protein Group 384**

**Expression Quality:**

| Group                 | Group Probability | Num Peptides | % Seq Coverage | Num Spectra |
|-----------------------|-------------------|--------------|----------------|-------------|
| Total (Non-Redundant) | 1                 | 1            | 11.05          | 5.0         |

**Peptides:**

| Observed | Mr(expt)  | Mr(calc)  | Mass Error (ppm) | Charge | Score | Score Delta | Peptide                                                | Group | Replicate |
|----------|-----------|-----------|------------------|--------|-------|-------------|--------------------------------------------------------|-------|-----------|
| 729.9854 | 2186.9326 | 2187.5308 | 273.46           | 3      | 3.27  | 0.95        | TPGPHYFICGIPGHCTGGMK : +57.05000 (C9); +57.05000 (C15) | LYK   | rep3      |
| 1094.097 | 2186.1783 | 2187.5308 | 618.28           | 2      | 2.5   | 1.01        | TPGPHYFICGIPGHCTGGMK : +57.05000 (C9); +57.05000 (C15) | LYT   | rep1      |

**Matching Genes:**

[NP\\_177368.1](#) (plastocyanin-like domain-containing protein [Arabidopsis thaliana])

**Protein Group 385**

**Expression Quality:**

| Group                 | Group Probability | Num Peptides | % Seq Coverage | Num Spectra |
|-----------------------|-------------------|--------------|----------------|-------------|
| Total (Non-Redundant) | 1                 | 1            | 7.04           | 5.0         |

**Peptides:**

| Observed | Mr(expt)  | Mr(calc) | Mass Error (ppm) | Charge | Score | Score Delta | Peptide        | Group | Replicate |
|----------|-----------|----------|------------------|--------|-------|-------------|----------------|-------|-----------|
| 504.9787 | 1511.9126 | 1511.84  | 48.06            | 3      | 3.27  | 1.14        | KGGMIVLPAGIYHR | LYK   | rep1      |

|          |           |         |        |   |      |      |                |     |      |
|----------|-----------|---------|--------|---|------|------|----------------|-----|------|
| 504.8787 | 1511.6127 | 1511.84 | 150.32 | 3 | 1.62 | 0.11 | KGGMIVLPAGIYHR | LYT | rep3 |
|----------|-----------|---------|--------|---|------|------|----------------|-----|------|

**Matching Genes:**

NP\_001031640.2 (ATARD2; metal ion binding [Arabidopsis thaliana])

**Protein Group 386**

**Expression Quality:**

| Group                 | Group Probability | Num Peptides | % Seq Coverage | Num Spectra |
|-----------------------|-------------------|--------------|----------------|-------------|
| Total (Non-Redundant) | 1                 | 1            | 3.68           | 10.0        |

**Peptides:**

| Observed | Mr(expt)  | Mr(calc)  | Mass Error (ppm) | Charge | Score | Score Delta | Peptide      | Group | Replicate |
|----------|-----------|-----------|------------------|--------|-------|-------------|--------------|-------|-----------|
| 473.0674 | 1416.1787 | 1415.6457 | 376.46           | 3      | 3.26  | 0.85        | VVHHSEIVNILR | LYK   | rep2      |
| 473.1081 | 1416.3008 | 1415.6457 | 462.73           | 3      | 2.88  | 0.98        | VVHHSEIVNILR | LYT   | rep2      |

**Matching Genes:**

NP\_197445.1 (cinnamyl-alcohol dehydrogenase, putative (CAD) [Arabidopsis thaliana])

**Protein Group 387**

**Expression Quality:**

| Group                 | Group Probability | Num Peptides | % Seq Coverage | Num Spectra |
|-----------------------|-------------------|--------------|----------------|-------------|
| Total (Non-Redundant) | 1                 | 1            | 2.71           | 3.0         |

**Peptides:**

| Observed | Mr(expt)  | Mr(calc)  | Mass Error (ppm) | Charge | Score | Score Delta | Peptide       | Group | Replicate |
|----------|-----------|-----------|------------------|--------|-------|-------------|---------------|-------|-----------|
| 532.4755 | 1594.4029 | 1593.7898 | 384.7            | 3      | 3.25  | 1.49        | HLHVYSWPQGELK | LYK   | rep3      |
| 532.2128 | 1593.6148 | 1593.7898 | 109.77           | 3      | 2.77  | 1           | HLHVYSWPQGELK | LYT   | rep3      |

**Matching Genes:**

NP\_189022.1 (selenium-binding family protein [Arabidopsis thaliana])

---

**Protein Group 388**

**Expression Quality:**

| Group                 | Group Probability | Num Peptides | % Seq Coverage | Num Spectra |
|-----------------------|-------------------|--------------|----------------|-------------|
| Total (Non-Redundant) | 0.99              | 1            | 6.41           | 8.0         |

**Peptides:**

| Observed | Mr(expt)  | Mr(calc)  | Mass Error (ppm) | Charge | Score | Score Delta | Peptide              | Group | Replicate |
|----------|-----------|-----------|------------------|--------|-------|-------------|----------------------|-------|-----------|
| 729.9845 | 2186.93   | 2186.6479 | 129              | 3      | 3.25  | 0.97        | QQLPSIAPKPLIIPPIFSAR | LYT   | rep2      |
| 730.3314 | 2187.9708 | 2186.6479 | 604.97           | 3      | 2.7   | 0.49        | QQLPSIAPKPLIIPPIFSAR | LYK   | rep3      |

**Matching Genes:**

[NP\\_196701.1](#) (protein kinase-related [Arabidopsis thaliana])

---

**Protein Group 389**

**Expression Quality:**

| Group                 | Group Probability | Num Peptides | % Seq Coverage | Num Spectra |
|-----------------------|-------------------|--------------|----------------|-------------|
| Total (Non-Redundant) | 1                 | 1            | 6.5            | 5.0         |

**Peptides:**

| Observed | Mr(expt)  | Mr(calc)  | Mass Error (ppm) | Charge | Score | Score Delta | Peptide          | Group | Replicate |
|----------|-----------|-----------|------------------|--------|-------|-------------|------------------|-------|-----------|
| 590.3602 | 1768.0572 | 1767.9897 | 38.17            | 3      | 3.19  | 1.79        | HLSLNGNSEVAVFRPK | LYT   | rep3      |
| 590.2518 | 1767.732  | 1767.9897 | 145.77           | 3      | 3.01  | 1.34        | HLSLNGNSEVAVFRPK | LYK   | rep2      |

**Matching Genes:**

[NP\\_566401.1](#) (unknown protein [Arabidopsis thaliana])

---

**Protein Group 390****Expression Quality:**

| Group                 | Group Probability | Num Peptides | % Seq Coverage | Num Spectra |
|-----------------------|-------------------|--------------|----------------|-------------|
| Total (Non-Redundant) | 1                 | 1            | 11.51          | 5.0         |

**Peptides:**

| Observed | Mr(expt)  | Mr(calc)  | Mass Error (ppm) | Charge | Score | Score Delta | Peptide          | Group | Replicate |
|----------|-----------|-----------|------------------|--------|-------|-------------|------------------|-------|-----------|
| 868.1147 | 1734.2137 | 1734.9182 | 406.1            | 2      | 3.19  | 1.26        | VNELRPGTNGHSLNVK | LYK   | rep3      |
| 579.4113 | 1735.2103 | 1734.9182 | 168.36           | 3      | 2.6   | 1.2         | VNELRPGTNGHSLNVK | LYT   | rep3      |

**Matching Genes:**

NP\_563874.1 (DNA-binding protein-related [Arabidopsis thaliana])

---

**Protein Group 391****Expression Quality:**

| Group                 | Group Probability | Num Peptides | % Seq Coverage | Num Spectra |
|-----------------------|-------------------|--------------|----------------|-------------|
| Total (Non-Redundant) | 1                 | 1            | 4.69           | 3.0         |

**Peptides:**

| Observed | Mr(expt)  | Mr(calc)  | Mass Error (ppm) | Charge | Score | Score Delta | Peptide            | Group | Replicate |
|----------|-----------|-----------|------------------|--------|-------|-------------|--------------------|-------|-----------|
| 677.8954 | 2030.6627 | 2031.2435 | 285.95           | 3      | 3.18  | 1.04        | ALSNTRPSAHLHAHLYDK | LYK   | rep2      |

**Matching Genes:**

[NP\\_565791.1](#) (katanin, putative [Arabidopsis thaliana])

---

**Protein Group 392****Expression Quality:**

| Group                 | Group Probability | Num Peptides | % Seq Coverage | Num Spectra |
|-----------------------|-------------------|--------------|----------------|-------------|
| Total (Non-Redundant) | 1                 | 1            | 8.81           | 3.0         |

**Peptides:**

| Observed | Mr(expt)  | Mr(calc)  | Mass Error (ppm) | Charge | Score | Score Delta | Peptide             | Group | Replicate |
|----------|-----------|-----------|------------------|--------|-------|-------------|---------------------|-------|-----------|
| 739.5641 | 2215.6688 | 2216.5649 | 404.29           | 3      | 3.17  | 1.47        | AHEAVKPYMPTVEEVVAFK | LYK   | rep3      |
| 739.5927 | 2215.7545 | 2216.5649 | 365.63           | 3      | 2.15  | 0.31        | AHEAVKPYMPTVEEVVAFK | LYT   | rep1      |

**Matching Genes:**

[NP\\_174033.1](#) (ATGSTU13 (GLUTATHIONE S-TRANSFERASE 12); glutathione transferase [Arabidopsis thaliana])

**Protein Group 393**

**Expression Quality:**

| Group                 | Group Probability | Num Peptides | % Seq Coverage | Num Spectra |
|-----------------------|-------------------|--------------|----------------|-------------|
| Total (Non-Redundant) | 1                 | 1            | 2.16           | 3.0         |

**Peptides:**

| Observed | Mr(expt)  | Mr(calc)  | Mass Error (ppm) | Charge | Score | Score Delta | Peptide      | Group | Replicate |
|----------|-----------|-----------|------------------|--------|-------|-------------|--------------|-------|-----------|
| 710.2159 | 1418.4161 | 1418.5649 | 104.95           | 2      | 3.14  | 1.47        | HGLHNPFKSPER | LYT   | rep1      |
| 473.9672 | 1418.878  | 1418.5649 | 220.7            | 3      | 2.09  | 0.63        | HGLHNPFKSPER | LYK   | rep1      |

**Matching Genes:**

NP\_568955.1 (ALDH12A1 (Aldehyde dehydrogenase 12A1); 1-pyrroline-5-carboxylate dehydrogenase/ 3-chloroallyl aldehyde dehydrogenase [Arabidopsis thaliana])

**Protein Group 394**

**Expression Quality:**

| Group                 | Group Probability | Num Peptides | % Seq Coverage | Num Spectra |
|-----------------------|-------------------|--------------|----------------|-------------|
| Total (Non-Redundant) | 1                 | 1            | 2.14           | 3.0         |



**Peptides:**

| Observed | Mr(expt)  | Mr(calc)  | Mass Error (ppm) | Charge | Score | Score Delta | Peptide            | Group | Replicate |
|----------|-----------|-----------|------------------|--------|-------|-------------|--------------------|-------|-----------|
| 673.9769 | 2018.9073 | 2019.3143 | 201.56           | 3      | 3.09  | 0.76        | HVSHLFLGFPGHTITVEK | LYT   | rep3      |
| 673.8729 | 2018.5953 | 2019.3143 | 356.07           | 3      | 2.82  | 0.32        | HVSHLFLGFPGHTITVEK | LYK   | rep2      |

**Matching Genes:**

[NP\\_195152.2](#) (unknown protein [Arabidopsis thaliana])

**Protein Group 395****Expression Quality:**

| Group                 | Group Probability | Num Peptides | % Seq Coverage | Num Spectra |
|-----------------------|-------------------|--------------|----------------|-------------|
| Total (Non-Redundant) | 1                 | 1            | 5.6            | 4.0         |

**Peptides:**

| Observed | Mr(expt)  | Mr(calc) | Mass Error (ppm) | Charge | Score | Score Delta | Peptide        | Group | Replicate |
|----------|-----------|----------|------------------|--------|-------|-------------|----------------|-------|-----------|
| 558.4476 | 1672.3194 | 1671.894 | 254.43           | 3      | 3.04  | 1.27        | FKFPVDSVELYAEK | LYK   | rep2      |
| 836.5775 | 1671.1394 | 1671.894 | 451.34           | 2      | 2.5   | 1.13        | FKFPVDSVELYAEK | LYT   | rep2      |

**Matching Genes:**

NP\_180719.1 (40S ribosomal protein S3 (RPS3A) [Arabidopsis thaliana])

**Protein Group 396****Expression Quality:**

| Group                 | Group Probability | Num Peptides | % Seq Coverage | Num Spectra |
|-----------------------|-------------------|--------------|----------------|-------------|
| Total (Non-Redundant) | 1                 | 1            | 2.56           | 6.0         |

**Peptides:**

| Observed | Mr(expt) | Mr(calc) | Mass Error (ppm) | Charge | Score | Score Delta | Peptide | Group | Replicate |
|----------|----------|----------|------------------|--------|-------|-------------|---------|-------|-----------|
|----------|----------|----------|------------------|--------|-------|-------------|---------|-------|-----------|

|          |           |           |         |   |      |      |               |     |      |
|----------|-----------|-----------|---------|---|------|------|---------------|-----|------|
| 476.3461 | 1426.0149 | 1424.5713 | 1013.38 | 3 | 3.02 | 1.13 | SPAGLFFQHAGHR | LYK | rep3 |
| 713.0777 | 1424.1397 | 1424.5713 | 302.96  | 2 | 2.95 | 1.65 | SPAGLFFQHAGHR | LYT | rep3 |

**Matching Genes:**

NP\_565456.2 (FVE (FVE) [Arabidopsis thaliana])

**Protein Group 397**

**Expression Quality:**

| Group                 | Group Probability | Num Peptides | % Seq Coverage | Num Spectra |
|-----------------------|-------------------|--------------|----------------|-------------|
| Total (Non-Redundant) | 1                 | 1            | 13.98          | 4.0         |

**Peptides:**

| Observed  | Mr(expt)  | Mr(calc)  | Mass Error (ppm) | Charge | Score | Score Delta | Peptide                          | Group | Replicate |
|-----------|-----------|-----------|------------------|--------|-------|-------------|----------------------------------|-------|-----------|
| 1223.8685 | 3668.5821 | 3669.0754 | 134.45           | 3      | 2.99  | 1.44        | VAASGFYVVVPDYFGGDPYNPSNQDRPIPVIK | LYK   | rep2      |
| 1224.2938 | 3669.858  | 3669.0754 | 213.29           | 3      | 2.66  | 1.06        | VAASGFYVVVPDYFGGDPYNPSNQDRPIPVIK | LYT   | rep3      |

**Matching Genes:**

[NP\\_001030749.1](#) (hydrolase [Arabidopsis thaliana])

**Protein Group 398**

**Expression Quality:**

| Group                 | Group Probability | Num Peptides | % Seq Coverage | Num Spectra |
|-----------------------|-------------------|--------------|----------------|-------------|
| Total (Non-Redundant) | 1                 | 1            | 4.46           | 3.0         |

**Peptides:**

| Observed | Mr(expt)  | Mr(calc) | Mass Error (ppm) | Charge | Score | Score Delta | Peptide                 | Group | Replicate |
|----------|-----------|----------|------------------|--------|-------|-------------|-------------------------|-------|-----------|
| 894.5061 | 2680.4948 | 2680.845 | 130.6            | 3      | 2.94  | 1.58        | HDETGVSNDLYDFLQAFFAEHPK | LYK   | rep2      |
| 894.54   | 2680.5966 | 2680.845 | 92.63            | 3      | 2.77  | 1.43        | HDETGVSNDLYDFLQAFFAEHPK | LYT   | rep3      |

**Matching Genes:**

[NP\\_187652.1](#) (SCPL49 (serine carboxypeptidase-like 49); serine carboxypeptidase [Arabidopsis thaliana])

---

**Protein Group 399****Expression Quality:**

| Group                 | Group Probability | Num Peptides | % Seq Coverage | Num Spectra |
|-----------------------|-------------------|--------------|----------------|-------------|
| Total (Non-Redundant) | 1                 | 1            | 2.66           | 7.0         |

**Peptides:**

| Observed | Mr(expt)  | Mr(calc)  | Mass Error (ppm) | Charge | Score | Score Delta | Peptide     | Group | Replicate |
|----------|-----------|-----------|------------------|--------|-------|-------------|-------------|-------|-----------|
| 440.6762 | 1319.0051 | 1318.4853 | 394.25           | 3      | 2.94  | 1.37        | KFTSAFPHVER | LYT   | rep2      |
| 440.3031 | 1317.8858 | 1318.4853 | 454.7            | 3      | 2.9   | 1           | KFTSAFPHVER | LYK   | rep2      |

**Matching Genes:**

[NP\\_001031202.1](#) (translation elongation factor [Arabidopsis thaliana])

---

**Protein Group 400****Expression Quality:**

| Group                 | Group Probability | Num Peptides | % Seq Coverage | Num Spectra |
|-----------------------|-------------------|--------------|----------------|-------------|
| Total (Non-Redundant) | 1                 | 1            | 2.49           | 4.0         |

**Peptides:**

| Observed  | Mr(expt)  | Mr(calc)  | Mass Error (ppm) | Charge | Score | Score Delta | Peptide           | Group | Replicate |
|-----------|-----------|-----------|------------------|--------|-------|-------------|-------------------|-------|-----------|
| 1007.1648 | 2012.314  | 2013.2696 | 474.67           | 2      | 2.92  | 1.27        | LHVHTVQQLQQELANVR | LYT   | rep3      |
| 672.7556  | 2015.2434 | 2013.2696 | 980.36           | 3      | 1.9   | 0.36        | LHVHTVQQLQQELANVR | LYK   | rep1      |

**Matching Genes:**

[NP\\_001078752.1](#) (unknown protein [Arabidopsis thaliana])

---

**Protein Group 401****Expression Quality:**

| Group                 | Group Probability | Num Peptides | % Seq Coverage | Num Spectra |
|-----------------------|-------------------|--------------|----------------|-------------|
| Total (Non-Redundant) | 1                 | 1            | 9.02           | 3.0         |

**Peptides:**

| Observed | Mr(expt)  | Mr(calc)  | Mass Error (ppm) | Charge | Score | Score Delta | Peptide      | Group | Replicate |
|----------|-----------|-----------|------------------|--------|-------|-------------|--------------|-------|-----------|
| 470.6429 | 1408.9052 | 1408.6532 | 178.89           | 3      | 2.92  | 1.28        | KQFVIDVLHPGR | LYT   | rep1      |

**Matching Genes:**

[NP\\_187143.1](#) (40S ribosomal protein S24 (RPS24A) [Arabidopsis thaliana])

---

**Protein Group 402****Expression Quality:**

| Group                 | Group Probability | Num Peptides | % Seq Coverage | Num Spectra |
|-----------------------|-------------------|--------------|----------------|-------------|
| Total (Non-Redundant) | 1                 | 1            | 4.02           | 4.0         |

**Peptides:**

| Observed | Mr(expt)  | Mr(calc)  | Mass Error (ppm) | Charge | Score | Score Delta | Peptide  | Group | Replicate |
|----------|-----------|-----------|------------------|--------|-------|-------------|----------|-------|-----------|
| 343.7741 | 1028.2988 | 1027.1831 | 1086.23          | 3      | 2.92  | 0.74        | HHFAQLFK | LYK   | rep1      |
| 343.389  | 1027.1436 | 1027.1831 | 38.41            | 3      | 2.84  | 0.96        | HHFAQLFK | LYT   | rep2      |

**Matching Genes:**

[NP\\_001030868.1](#) (zinc ion binding [Arabidopsis thaliana])

---

**Protein Group 403**

**Expression Quality:**

| Group                 | Group Probability | Num Peptides | % Seq Coverage | Num Spectra |
|-----------------------|-------------------|--------------|----------------|-------------|
| Total (Non-Redundant) | 1                 | 1            | 4.4            | 9.0         |

**Peptides:**

| Observed | Mr(expt)  | Mr(calc)  | Mass Error (ppm) | Charge | Score | Score Delta | Peptide     | Group | Replicate |
|----------|-----------|-----------|------------------|--------|-------|-------------|-------------|-------|-----------|
| 649.5332 | 1297.0508 | 1297.4213 | 285.52           | 2      | 2.89  | 1.3         | YHVHSPESLTK | LYT   | rep1      |
| 433.532  | 1297.5727 | 1297.4213 | 116.69           | 3      | 2.56  | 0.7         | YHVHSPESLTK | LYK   | rep1      |

**Matching Genes:**

[NP\\_188850.1](#) (PAC1 (20S proteasome alpha subunit C1); peptidase [Arabidopsis thaliana])

---

**Protein Group 404****Expression Quality:**

| Group                 | Group Probability | Num Peptides | % Seq Coverage | Num Spectra |
|-----------------------|-------------------|--------------|----------------|-------------|
| Total (Non-Redundant) | 1                 | 1            | 3.04           | 4.0         |

**Peptides:**

| Observed | Mr(expt)  | Mr(calc)  | Mass Error (ppm) | Charge | Score | Score Delta | Peptide                                        | Group | Replicate |
|----------|-----------|-----------|------------------|--------|-------|-------------|------------------------------------------------|-------|-----------|
| 757.6809 | 1513.3462 | 1513.7687 | 279.09           | 2      | 2.86  | 1.18        | ACGVCHSDLHVMK : +57.05000 (C2); +57.05000 (C5) | LYK   | rep1      |
| 505.5596 | 1513.6552 | 1513.7687 | 74.96            | 3      | 1.4   | 0.19        | ACGVCHSDLHVMK : +57.05000 (C2); +57.05000 (C5) | LYT   | rep3      |

**Matching Genes:**

[NP\\_568975.2](#) (oxidoreductase, zinc-binding dehydrogenase family protein [Arabidopsis thaliana])

---

**Protein Group 405****Expression Quality:**

| Group | Group Probability | Num Peptides | % Seq Coverage | Num Spectra |
|-------|-------------------|--------------|----------------|-------------|
|-------|-------------------|--------------|----------------|-------------|

|                       |   |   |     |     |
|-----------------------|---|---|-----|-----|
| Total (Non-Redundant) | 1 | 1 | 2.1 | 4.0 |
|-----------------------|---|---|-----|-----|

**Peptides:**

| Observed | Mr(expt)  | Mr(calc)  | Mass Error (ppm) | Charge | Score | Score Delta | Peptide     | Group | Replicate |
|----------|-----------|-----------|------------------|--------|-------|-------------|-------------|-------|-----------|
| 648.0777 | 1294.1397 | 1294.4637 | 250.33           | 2      | 2.86  | 1.39        | FTQLSSHPLHK | LYT   | rep3      |
| 648.0349 | 1294.0542 | 1294.4637 | 316.35           | 2      | 2.13  | 0.7         | FTQLSSHPLHK | LYK   | rep2      |

**Matching Genes:**

NP\_001030958.1 (nucleotide binding [Arabidopsis thaliana])

**Protein Group 406**

**Expression Quality:**

| Group                 | Group Probability | Num Peptides | % Seq Coverage | Num Spectra |
|-----------------------|-------------------|--------------|----------------|-------------|
| Total (Non-Redundant) | 1                 | 1            | 2.78           | 5.0         |

**Peptides:**

| Observed | Mr(expt)  | Mr(calc)  | Mass Error (ppm) | Charge | Score | Score Delta | Peptide         | Group | Replicate |
|----------|-----------|-----------|------------------|--------|-------|-------------|-----------------|-------|-----------|
| 580.4052 | 1738.192  | 1736.9724 | 702.13           | 3      | 2.84  | 1.28        | VPALDYVDIPHTQIR | LYK   | rep2      |
| 579.9332 | 1736.7762 | 1736.9724 | 112.95           | 3      | 2.33  | 0.72        | VPALDYVDIPHTQIR | LYT   | rep3      |

**Matching Genes:**

NP\_566470.1 (dihydrolipoamide S-acetyltransferase, putative [Arabidopsis thaliana])

**Protein Group 407**

**Expression Quality:**

| Group                 | Group Probability | Num Peptides | % Seq Coverage | Num Spectra |
|-----------------------|-------------------|--------------|----------------|-------------|
| Total (Non-Redundant) | 1                 | 1            | 4.34           | 10.0        |

**Peptides:**

| Observed | Mr(expt)  | Mr(calc)  | Mass Error (ppm) | Charge | Score | Score Delta | Peptide          | Group | Replicate |
|----------|-----------|-----------|------------------|--------|-------|-------------|------------------|-------|-----------|
| 535.6073 | 1603.7984 | 1603.7862 | 7.59             | 3      | 2.83  | 1.34        | YHASAIHVPGPPEVAR | LYK   | rep3      |
| 802.4871 | 1602.9585 | 1603.7862 | 516.1            | 2      | 2.66  | 1.5         | YHASAIHVPGPPEVAR | LYT   | rep3      |

**Matching Genes:**

NP\_001078234.1 (NIT1 (NITRILASE 1) [Arabidopsis thaliana])

**Protein Group 408**

**Expression Quality:**

| Group                 | Group Probability | Num Peptides | % Seq Coverage | Num Spectra |
|-----------------------|-------------------|--------------|----------------|-------------|
| Total (Non-Redundant) | 1                 | 1            | 6.93           | 3.0         |

**Peptides:**

| Observed | Mr(expt)  | Mr(calc)  | Mass Error (ppm) | Charge | Score | Score Delta | Peptide                                                       | Group | Replicate |
|----------|-----------|-----------|------------------|--------|-------|-------------|---------------------------------------------------------------|-------|-----------|
| 947.8824 | 2840.6239 | 2840.3613 | 92.44            | 3      | 2.8   | 1.27        | GALIANPNCSTIICLMAVTPLHHHAK : +57.05000 (C9); +57.05000 ( C14) | LYK   | rep1      |
| 947.4652 | 2839.3722 | 2840.3613 | 348.24           | 3      | 2.09  | 0.06        | GALIANPNCSTIICLMAVTPLHHHAK : +57.05000 (C9); +57.05000 (C14)  | LYT   | rep1      |

**Matching Genes:**

[NP\\_172934.1](#) (semialdehyde dehydrogenase family protein [Arabidopsis thaliana])

**Protein Group 409**

**Expression Quality:**

| Group                 | Group Probability | Num Peptides | % Seq Coverage | Num Spectra |
|-----------------------|-------------------|--------------|----------------|-------------|
| Total (Non-Redundant) | 1                 | 1            | 2.88           | 10.0        |

**Peptides:**

| Observed | Mr(expt)  | Mr(calc)  | Mass Error (ppm) | Charge | Score | Score Delta | Peptide                    | Group | Replicate |
|----------|-----------|-----------|------------------|--------|-------|-------------|----------------------------|-------|-----------|
| 407.7485 | 1220.2221 | 1220.4271 | 167.96           | 3      | 2.77  | 1.24        | MHFHDCFVK : +57.05000 (C6) | LYK   | rep2      |
| 407.7997 | 1220.3756 | 1220.4271 | 42.23            | 3      | 2.47  | 0.96        | MHFHDCFVK : +57.05000 (C6) | LYT   | rep3      |

**Matching Genes:**

[NP\\_197284.1](#) (peroxidase 57 (PER57) (P57) (PRXR10) [Arabidopsis thaliana])

**Protein Group 410**

**Expression Quality:**

| Group                 | Group Probability | Num Peptides | % Seq Coverage | Num Spectra |
|-----------------------|-------------------|--------------|----------------|-------------|
| Total (Non-Redundant) | 1                 | 1            | 8.45           | 15.0        |

**Peptides:**

| Observed | Mr(expt)  | Mr(calc)  | Mass Error (ppm) | Charge | Score | Score Delta | Peptide      | Group | Replicate |
|----------|-----------|-----------|------------------|--------|-------|-------------|--------------|-------|-----------|
| 603.5821 | 1205.1485 | 1205.3718 | 185.29           | 2      | 2.77  | 1.23        | KGHAVGDIPGVR | LYT   | rep1      |
| 603.5775 | 1205.1394 | 1205.3718 | 192.78           | 2      | 2.73  | 1.4         | KGHAVGDIPGVR | LYK   | rep1      |

**Matching Genes:**

NP\_195916.1 (40S ribosomal protein S23 (RPS23B) [Arabidopsis thaliana])

**Protein Group 411**

**Expression Quality:**

| Group                 | Group Probability | Num Peptides | % Seq Coverage | Num Spectra |
|-----------------------|-------------------|--------------|----------------|-------------|
| Total (Non-Redundant) | 1                 | 1            | 9.15           | 3.0         |

**Peptides:**

| Observed | Mr(expt) | Mr(calc) | Mass Error (ppm) | Charge | Score | Score Delta | Peptide | Group | Replicate |
|----------|----------|----------|------------------|--------|-------|-------------|---------|-------|-----------|
|----------|----------|----------|------------------|--------|-------|-------------|---------|-------|-----------|



|          |           |          |        |   |      |      |              |     |      |
|----------|-----------|----------|--------|---|------|------|--------------|-----|------|
| 735.2112 | 1468.4068 | 1469.607 | 816.73 | 2 | 2.76 | 1.19 | STHGYHILSEGR | LYT | rep3 |
| 490.7954 | 1469.3628 | 1469.607 | 166.23 | 3 | 2.4  | 0.6  | STHGYHILSEGR | LYK | rep2 |

**Matching Genes:**

NP\_564250.1 (peptidyl-prolyl cis-trans isomerase PPIC-type family protein [Arabidopsis thaliana])

**Protein Group 412**

**Expression Quality:**

| Group                 | Group Probability | Num Peptides | % Seq Coverage | Num Spectra |
|-----------------------|-------------------|--------------|----------------|-------------|
| Total (Non-Redundant) | 1                 | 1            | 5.65           | 3.0         |

**Peptides:**

| Observed | Mr(expt)  | Mr(calc)  | Mass Error (ppm) | Charge | Score | Score Delta | Peptide        | Group | Replicate |
|----------|-----------|-----------|------------------|--------|-------|-------------|----------------|-------|-----------|
| 827.0214 | 1652.0271 | 1652.8124 | 475.09           | 2      | 2.7   | 1.27        | SYEHPSNELKPVPR | LYT   | rep3      |
| 551.7494 | 1652.2247 | 1652.8124 | 355.56           | 3      | 2.59  | 1.18        | SYEHPSNELKPVPR | LYK   | rep1      |

**Matching Genes:**

NP\_188925.1 (unknown protein [Arabidopsis thaliana])

**Protein Group 413**

**Expression Quality:**

| Group                 | Group Probability | Num Peptides | % Seq Coverage | Num Spectra |
|-----------------------|-------------------|--------------|----------------|-------------|
| Total (Non-Redundant) | 1                 | 1            | 8.59           | 4.0         |

**Peptides:**

| Observed | Mr(expt)  | Mr(calc)  | Mass Error (ppm) | Charge | Score | Score Delta | Peptide           | Group | Replicate |
|----------|-----------|-----------|------------------|--------|-------|-------------|-------------------|-------|-----------|
| 596.0968 | 1785.2669 | 1784.9789 | 161.38           | 3      | 2.67  | 1.26        | HIDFALTSPFGGGRPGR | LYT   | rep1      |
| 595.8495 | 1784.525  | 1784.9789 | 254.28           | 3      | 2.16  | 0.88        | HIDFALTSPFGGGRPGR | LYK   | rep2      |

**Matching Genes:**

[NP\\_197024.1](#) (40S ribosomal protein S9 (RPS9B) [Arabidopsis thaliana])

---

**Protein Group 414****Expression Quality:**

| Group                 | Group Probability | Num Peptides | % Seq Coverage | Num Spectra |
|-----------------------|-------------------|--------------|----------------|-------------|
| Total (Non-Redundant) | 1                 | 1            | 14.71          | 3.0         |

**Peptides:**

| Observed | Mr(expt)  | Mr(calc)  | Mass Error (ppm) | Charge | Score | Score Delta | Peptide                   | Group | Replicate |
|----------|-----------|-----------|------------------|--------|-------|-------------|---------------------------|-------|-----------|
| 955.1667 | 2862.4768 | 2862.0806 | 138.44           | 3      | 2.62  | 1.28        | DAFDLYDQDKNGLISASELHQVLNR | LYT   | rep3      |
| 954.9895 | 2861.945  | 2862.0806 | 47.35            | 3      | 1.61  | 0.31        | DAFDLYDQDKNGLISASELHQVLNR | LYK   | rep1      |

**Matching Genes:**

[NP\\_173259.1](#) (calcium-binding protein, putative [Arabidopsis thaliana])

---

**Protein Group 415****Expression Quality:**

| Group                 | Group Probability | Num Peptides | % Seq Coverage | Num Spectra |
|-----------------------|-------------------|--------------|----------------|-------------|
| Total (Non-Redundant) | 1                 | 1            | 11.81          | 8.0         |

**Peptides:**

| Observed | Mr(expt)  | Mr(calc)  | Mass Error (ppm) | Charge | Score | Score Delta | Peptide           | Group | Replicate |
|----------|-----------|-----------|------------------|--------|-------|-------------|-------------------|-------|-----------|
| 931.6239 | 1861.2322 | 1862.0185 | 422.3            | 2      | 2.6   | 1.16        | SWTGTIIGPHNTVHEGR | LYT   | rep1      |
| 621.61   | 1861.8065 | 1862.0185 | 113.89           | 3      | 2.57  | 0.68        | SWTGTIIGPHNTVHEGR | LYK   | rep3      |

**Matching Genes:**

[NP\\_001078011.1](#) (MMZ3 (MMS ZWEI HOMOLOGE 3) [Arabidopsis thaliana])

---

**Protein Group 416****Expression Quality:**

| Group                 | Group Probability | Num Peptides | % Seq Coverage | Num Spectra |
|-----------------------|-------------------|--------------|----------------|-------------|
| Total (Non-Redundant) | 1                 | 1            | 4.21           | 5.0         |

**Peptides:**

| Observed | Mr(expt)  | Mr(calc)  | Mass Error (ppm) | Charge | Score | Score Delta | Peptide   | Group | Replicate |
|----------|-----------|-----------|------------------|--------|-------|-------------|-----------|-------|-----------|
| 428.8571 | 1283.5477 | 1283.5083 | 30.7             | 3      | 2.59  | 1.15        | HMYHDMYMR | LYT   | rep2      |
| 429.1337 | 1284.3777 | 1283.5083 | 677.38           | 3      | 2.39  | 0.83        | HMYHDMYMR | LYK   | rep2      |

**Matching Genes:**

[NP\\_171777.1](#) (EMB2386 (EMBRYO DEFECTIVE 2386); structural constituent of ribosome [Arabidopsis thaliana])

---

**Protein Group 417****Expression Quality:**

| Group                 | Group Probability | Num Peptides | % Seq Coverage | Num Spectra |
|-----------------------|-------------------|--------------|----------------|-------------|
| Total (Non-Redundant) | 1                 | 1            | 3.19           | 4.0         |

**Peptides:**

| Observed | Mr(expt)  | Mr(calc)  | Mass Error (ppm) | Charge | Score | Score Delta | Peptide       | Group | Replicate |
|----------|-----------|-----------|------------------|--------|-------|-------------|---------------|-------|-----------|
| 474.5856 | 1420.7332 | 1420.6622 | 49.99            | 3      | 2.58  | 1.01        | ELLKPSASVALHR | LYT   | rep3      |
| 474.7122 | 1421.1132 | 1420.6622 | 317.43           | 3      | 2.26  | 0.54        | ELLKPSASVALHR | LYK   | rep1      |

**Matching Genes:**

NP\_200637.1 (RPT3 (root phototropism 3); ATPase [Arabidopsis thaliana])

---

**Protein Group 418****Expression Quality:**

| Group                 | Group Probability | Num Peptides | % Seq Coverage | Num Spectra |
|-----------------------|-------------------|--------------|----------------|-------------|
| Total (Non-Redundant) | 1                 | 1            | 2.27           | 8.0         |

**Peptides:**

| Observed | Mr(expt)  | Mr(calc)  | Mass Error (ppm) | Charge | Score | Score Delta | Peptide     | Group | Replicate |
|----------|-----------|-----------|------------------|--------|-------|-------------|-------------|-------|-----------|
| 722.6172 | 1443.2188 | 1443.6395 | 291.44           | 2      | 2.58  | 1.07        | EVQIMHHLGHR | LYT   | rep1      |
| 722.7373 | 1443.459  | 1443.6395 | 125.03           | 2      | 1.98  | 0.38        | EVQIMHHLGHR | LYK   | rep2      |

**Matching Genes:**

NP\_194096.1 (CDPK6 (CALCIUM-DEPENDENT PROTEIN KINASE 6); anion channel/ calcium- and calmodulin-dependent protein kinase/ kinase [Arabidopsis thaliana])

---

**Protein Group 419****Expression Quality:**

| Group                 | Group Probability | Num Peptides | % Seq Coverage | Num Spectra |
|-----------------------|-------------------|--------------|----------------|-------------|
| Total (Non-Redundant) | 1                 | 1            | 3.63           | 3.0         |

**Peptides:**

| Observed | Mr(expt)  | Mr(calc)  | Mass Error (ppm) | Charge | Score | Score Delta | Peptide              | Group | Replicate |
|----------|-----------|-----------|------------------|--------|-------|-------------|----------------------|-------|-----------|
| 763.2416 | 2286.7013 | 2286.5535 | 64.64            | 3      | 2.55  | 1           | ELVDRNPELGHVLNDPSILR | LYK   | rep2      |
| 763.1749 | 2286.5013 | 2286.5535 | 22.81            | 3      | 2     | 0.56        | ELVDRNPELGHVLNDPSILR | LYT   | rep1      |

**Matching Genes:**

[NP\\_179311.1](#) (ubiquitin family protein [Arabidopsis thaliana])

---

**Protein Group 420****Expression Quality:**

| Group                 | Group Probability | Num Peptides | % Seq Coverage | Num Spectra |
|-----------------------|-------------------|--------------|----------------|-------------|
| Total (Non-Redundant) | 1                 | 1            | 4.83           | 8.0         |

**Peptides:**

| Observed | Mr(expt)  | Mr(calc)  | Mass Error (ppm) | Charge | Score | Score Delta | Peptide       | Group | Replicate |
|----------|-----------|-----------|------------------|--------|-------|-------------|---------------|-------|-----------|
| 699.1507 | 1396.2857 | 1396.6024 | 226.78           | 2      | 2.52  | 1.13        | GSVLRPGFIHGTR | LYK   | rep3      |
| 466.4772 | 1396.408  | 1396.6024 | 139.17           | 3      | 1.96  | 0.57        | GSVLRPGFIHGTR | LYT   | rep1      |

**Matching Genes:**

NP\_568323.1 (dehydrogenase-related [Arabidopsis thaliana])

**Protein Group 421**

**Expression Quality:**

| Group                 | Group Probability | Num Peptides | % Seq Coverage | Num Spectra |
|-----------------------|-------------------|--------------|----------------|-------------|
| Total (Non-Redundant) | 1                 | 1            | 5.42           | 3.0         |

**Peptides:**

| Observed | Mr(expt)  | Mr(calc)  | Mass Error (ppm) | Charge | Score | Score Delta | Peptide                                         | Group | Replicate |
|----------|-----------|-----------|------------------|--------|-------|-------------|-------------------------------------------------|-------|-----------|
| 500.2148 | 1497.6209 | 1497.8124 | 127.88           | 3      | 2.46  | 0.68        | GHLLTAGMCHLCK : +57.05000 (C9); +57.05000 (C12) | LYK   | rep1      |
| 500.152  | 1497.4326 | 1497.8124 | 253.55           | 3      | 2.11  | 0.86        | GHLLTAGMCHLCK : +57.05000 (C9); +57.05000 (C12) | LYT   | rep1      |

**Matching Genes:**

NP\_001030872.1 (ALPHA-SNAP2 (ALPHA-SOLUBLE NSF ATTACHMENT PROTEIN); soluble NSF attachment protein [Arabidopsis thaliana])

**Protein Group 422**

**Expression Quality:**

| Group                 | Group Probability | Num Peptides | % Seq Coverage | Num Spectra |
|-----------------------|-------------------|--------------|----------------|-------------|
| Total (Non-Redundant) | 1                 | 1            | 2.89           | 3.0         |

**Peptides:**

| Observed | Mr(expt)  | Mr(calc)  | Mass Error (ppm) | Charge | Score | Score Delta | Peptide                         | Group | Replicate |
|----------|-----------|-----------|------------------|--------|-------|-------------|---------------------------------|-------|-----------|
| 747.6303 | 1493.2449 | 1493.7352 | 328.21           | 2      | 2.43  | 1.08        | LVGAHCHLGSTITK : +57.05000 (C6) | LYT   | rep3      |

**Matching Genes:**

[NP\\_188056.1](#) (diaminopimelate decarboxylase, putative / DAP carboxylase, putative [Arabidopsis thaliana])

**Protein Group 423****Expression Quality:**

| Group                 | Group Probability | Num Peptides | % Seq Coverage | Num Spectra |
|-----------------------|-------------------|--------------|----------------|-------------|
| Total (Non-Redundant) | 1                 | 1            | 1.85           | 4.0         |

**Peptides:**

| Observed | Mr(expt)  | Mr(calc)  | Mass Error (ppm) | Charge | Score | Score Delta | Peptide            | Group | Replicate |
|----------|-----------|-----------|------------------|--------|-------|-------------|--------------------|-------|-----------|
| 976.6507 | 1951.2857 | 1952.1848 | 460.57           | 2      | 2.42  | 1.04        | LNVHVVPKSHDDVGVWIK | LYK   | rep2      |
| 651.6649 | 1951.9713 | 1952.1848 | 109.38           | 3      | 2.3   | 1.1         | LNVHVVPKSHDDVGVWIK | LYT   | rep3      |

**Matching Genes:**

[NP\\_001031878.1](#) (alpha-mannosidase [Arabidopsis thaliana])

**Protein Group 424****Expression Quality:**

| Group                 | Group Probability | Num Peptides | % Seq Coverage | Num Spectra |
|-----------------------|-------------------|--------------|----------------|-------------|
| Total (Non-Redundant) | 1                 | 1            | 2.76           | 4.0         |

**Peptides:**

| Observed | Mr(expt)  | Mr(calc)  | Mass Error (ppm) | Charge | Score | Score Delta | Peptide        | Group | Replicate |
|----------|-----------|-----------|------------------|--------|-------|-------------|----------------|-------|-----------|
| 555.743  | 1664.2056 | 1663.8833 | 193.74           | 3      | 2.41  | 0.87        | HFKEHTFVPTVTHK | LYT   | rep2      |

|          |           |           |        |   |     |      |                |     |      |
|----------|-----------|-----------|--------|---|-----|------|----------------|-----|------|
| 555.9792 | 1664.9143 | 1663.8833 | 619.62 | 3 | 2.1 | 0.83 | HFKGEHTFVPVTHK | LYK | rep1 |
|----------|-----------|-----------|--------|---|-----|------|----------------|-----|------|

**Matching Genes:**

NP\_192355.1 (aspartyl protease family protein [Arabidopsis thaliana])

**Protein Group 425**

**Expression Quality:**

| Group                 | Group Probability | Num Peptides | % Seq Coverage | Num Spectra |
|-----------------------|-------------------|--------------|----------------|-------------|
| Total (Non-Redundant) | 1                 | 1            | 8.02           | 5.0         |

**Peptides:**

| Observed  | Mr(expt)  | Mr(calc)  | Mass Error (ppm) | Charge | Score | Score Delta | Peptide           | Group | Replicate |
|-----------|-----------|-----------|------------------|--------|-------|-------------|-------------------|-------|-----------|
| 672.0326  | 2013.0743 | 2011.2906 | 886.83           | 3      | 2.4   | 1.16        | ILYSSVVYPHNYGFVPR | LYT   | rep2      |
| 1006.4026 | 2010.7896 | 2011.2906 | 249.12           | 2      | 2.37  | 1.14        | ILYSSVVYPHNYGFVPR | LYK   | rep2      |

**Matching Genes:**

[NP\\_171613.1](#) (inorganic pyrophosphatase, putative (soluble) / pyrophosphate phospho-hydrolase, putative / PPase, putative [Arabidopsis thaliana])

**Protein Group 426**

**Expression Quality:**

| Group                 | Group Probability | Num Peptides | % Seq Coverage | Num Spectra |
|-----------------------|-------------------|--------------|----------------|-------------|
| Total (Non-Redundant) | 1                 | 1            | 3.38           | 4.0         |

**Peptides:**

| Observed | Mr(expt)  | Mr(calc)  | Mass Error (ppm) | Charge | Score | Score Delta | Peptide          | Group | Replicate |
|----------|-----------|-----------|------------------|--------|-------|-------------|------------------|-------|-----------|
| 670.1166 | 2007.3263 | 2007.4313 | 52.31            | 3      | 2.27  | 0.57        | LVELLHHSVPLIPALR | LYK   | rep2      |
| 670.2384 | 2007.6917 | 2007.4313 | 129.75           | 3      | 1.83  | 0.43        | LVELLHHSVPLIPALR | LYT   | rep3      |

**Matching Genes:**

[NP\\_187328.1](#) (AT-IMP (Arabidopsis thaliana importin alpha); protein transporter)

---

**Protein Group 427**

**Expression Quality:**

| Group                 | Group Probability | Num Peptides | % Seq Coverage | Num Spectra |
|-----------------------|-------------------|--------------|----------------|-------------|
| Total (Non-Redundant) | 0.99              | 1            | 2.65           | 3.0         |

**Peptides:**

| Observed | Mr(expt)  | Mr(calc)  | Mass Error (ppm) | Charge | Score | Score Delta | Peptide         | Group | Replicate |
|----------|-----------|-----------|------------------|--------|-------|-------------|-----------------|-------|-----------|
| 522.9019 | 1565.6821 | 1565.7347 | 33.62            | 3      | 2.16  | 0.55        | TGHYTPISAGHSPLK | LYT   | rep3      |
| 523.2244 | 1566.6496 | 1565.7347 | 584.32           | 3      | 2.03  | 0.75        | TGHYTPISAGHSPLK | LYK   | rep2      |

**Matching Genes:**

NP\_191274.1 (NAP57 (ARABIDOPSIS THALIANA HOMOLOGUE OF NAP57) [Arabidopsis thaliana])

---

**Protein Group 428**

**Expression Quality:**

| Group                 | Group Probability | Num Peptides | % Seq Coverage | Num Spectra |
|-----------------------|-------------------|--------------|----------------|-------------|
| Total (Non-Redundant) | 1                 | 1            | 8.4            | 3.0         |

**Peptides:**

| Observed | Mr(expt)  | Mr(calc)  | Mass Error (ppm) | Charge | Score | Score Delta | Peptide     | Group | Replicate |
|----------|-----------|-----------|------------------|--------|-------|-------------|-------------|-------|-----------|
| 686.5862 | 1371.1568 | 1371.6131 | 332.73           | 2      | 2.14  | 1.01        | LVNYQHLMPTR | LYT   | rep1      |
| 687.1632 | 1372.3108 | 1371.6131 | 508.66           | 2      | 1.57  | 0.25        | LVNYQHLMPTR | LYK   | rep2      |

**Matching Genes:**

NP\_001078392.1 (60S ribosomal protein L27 (RPL27C) [Arabidopsis thaliana])



---

**Protein Group 429****Expression Quality:**

| Group                 | Group Probability | Num Peptides | % Seq Coverage | Num Spectra |
|-----------------------|-------------------|--------------|----------------|-------------|
| Total (Non-Redundant) | 0.99              | 1            | 16.36          | 6.0         |

**Peptides:**

| Observed  | Mr(expt)  | Mr(calc)  | Mass Error (ppm) | Charge | Score | Score Delta | Peptide                             | Group | Replicate |
|-----------|-----------|-----------|------------------|--------|-------|-------------|-------------------------------------|-------|-----------|
| 1207.201  | 3618.5797 | 3619.2768 | 192.63           | 3      | 2.13  | 0.81        | DSHVPILAPLPIGFAVFLVHLATIPITGTGINPAR | LYT   | rep1      |
| 1207.1327 | 3618.3746 | 3619.2768 | 249.29           | 3      | 1.64  | 0.51        | DSHVPILAPLPIGFAVFLVHLATIPITGTGINPAR | LYK   | rep1      |

**Matching Genes:**

[NP\\_001077441.1](#) (PIP1C (PLASMA MEMBRANE INTRINSIC PROTEIN 1;3) [Arabidopsis thaliana])

---

**Protein Group 430****Expression Quality:**

| Group                 | Group Probability | Num Peptides | % Seq Coverage | Num Spectra |
|-----------------------|-------------------|--------------|----------------|-------------|
| Total (Non-Redundant) | 0.99              | 1            | 4.15           | 3.0         |

**Peptides:**

| Observed | Mr(expt)  | Mr(calc)  | Mass Error (ppm) | Charge | Score | Score Delta | Peptide                              | Group | Replicate |
|----------|-----------|-----------|------------------|--------|-------|-------------|--------------------------------------|-------|-----------|
| 686.8221 | 2057.443  | 2058.3685 | 449.67           | 3      | 2.11  | 0.8         | EVLPWNGKGEAIMVVIDR : +32.00000 (M13) | LYK   | rep2      |
| 686.8824 | 2057.6239 | 2058.3685 | 361.78           | 3      | 1.95  | 0.28        | EVLPWNGKGEAIMVVIDR : +32.00000 (M13) | LYT   | rep2      |

**Matching Genes:**

[NP\\_198202.1](#) (unknown protein [Arabidopsis thaliana])

---

**Protein Group 431****Expression Quality:**

| Group                 | Group Probability | Num Peptides | % Seq Coverage | Num Spectra |
|-----------------------|-------------------|--------------|----------------|-------------|
| Total (Non-Redundant) | 0.99              | 1            | 9.47           | 12.0        |

**Peptides:**

| Observed | Mr(expt)  | Mr(calc)  | Mass Error (ppm) | Charge | Score | Score Delta | Peptide         | Group | Replicate |
|----------|-----------|-----------|------------------|--------|-------|-------------|-----------------|-------|-----------|
| 965.6377 | 1929.2598 | 1930.1809 | 477.21           | 2      | 1.95  | 0.84        | HVPQHRPGLPEQFYK | LYT   | rep3      |
| 965.6324 | 1929.2491 | 1930.1809 | 482.77           | 2      | 1.86  | 0.7         | HVPQHRPGLPEQFYK | LYK   | rep2      |

**Matching Genes:**

[NP\\_568778.1](#) (NADH-ubiquinone oxidoreductase-related [Arabidopsis thaliana])
